# Supplementary material for: Genome-wide detection of genotype environment interactions for flowering time in Brassica napus
Source: Front Plant Sci. 2022 Nov 21;13:1065766. doi: 10.3389/fpls.2022.1065766 (PMC9721451; doi:10.3389/fpls.2022.1065766)
Supplement: Supplementary file 1 [file Table_1.xlsx]

## Sheet: Table S1
Table S1. Summary of 490 B. napus accessions used in this study
Sample ID	Germplasm name	Origin	Sub-population
X2	Ganyou5	Hubei (China)	Semi-winter OSR
X4	Norin42	Japan	Semi-winter OSR
X6	Kelina	Chongqing (China)	Semi-winter OSR
X8	H-6	Japan	Semi-winter OSR
X10	Yan81-2	Chongqing (China)	Semi-winter OSR
X12	28887	Chongqing (China)	Semi-winter OSR
X14	Qianyou4	Guizhou (China)	Semi-winter OSR
X16	Qianyou331	Guizhou (China)	Semi-winter OSR
X18	Enyou73-1-2	Chongqing (China)	Semi-winter OSR
X20	Niuerduo	Chongqing (China)	Mixed type OSR
X22	880101	Chongqing (China)	Semi-winter OSR
X24	Swu40	Chongqing (China)	Semi-winter OSR
X26	Swu42	Chongqing (China)	Semi-winter OSR
X28	Swu43	Chongqing (China)	Semi-winter OSR
X30	Swu44	Chongqing (China)	Semi-winter OSR
X32	Swu45	Chongqing (China)	Semi-winter OSR
X34	Swu46	Chongqing (China)	Semi-winter OSR
X36	Swu47	Chongqing (China)	Semi-winter OSR
X40	Swu48	Chongqing (China)	Semi-winter OSR
X42	Swu52	Chongqing (China)	Semi-winter OSR
X44	Swu53	Chongqing (China)	Mixed type OSR
X46	Swu56	Chongqing (China)	Semi-winter OSR
X48	Swu59	Chongqing (China)	Semi-winter OSR
X50	Swu65	Chongqing (China)	Semi-winter OSR
X56	Swu92	Chongqing (China)	Semi-winter OSR
X60	Swu106	Chongqing (China)	Semi-winter OSR
X64	Chuanyou20	Sichuan (China)	Semi-winter OSR
X66	Chuanyou18	Sichuan (China)	Semi-winter OSR
X70	Cy12Ny-7	Sichuan (China)	Semi-winter OSR
X72	Cy12Q95406	Sichuan (China)	Semi-winter OSR
X74	Cy12Q8-7	Sichuan (China)	Semi-winter OSR
X76	Cy12Qsz06	Sichuan (China)	Semi-winter OSR
X78	Cy12Qcwh-1	Sichuan (China)	Semi-winter OSR
X80	Cy12Q95108	Sichuan (China)	Semi-winter OSR
X82	Cy12Q21535-N3	Sichuan (China)	Semi-winter OSR
X84	Cy12Pxw-4	Sichuan (China)	Semi-winter OSR
X86	Cy12Pxw-6	Sichuan (China)	Semi-winter OSR
X88	Cy12Pxw-9	Sichuan (China)	Semi-winter OSR
X90	Cy13Pxw-17	Sichuan (China)	Semi-winter OSR
X92	Cy14Pxw-18	Sichuan (China)	Semi-winter OSR
X94	Cy15Pxw-31	Sichuan (China)	Mixed type OSR
X96	Cy16Pxw-35	Sichuan (China)	Semi-winter OSR
X98	Cy17Pxw-58	Sichuan (China)	Semi-winter OSR
X100	Cy18Pxw-62	Sichuan (China)	Semi-winter OSR
X102	Cy19Pxw-65	Sichuan (China)	Semi-winter OSR
X104	Cy20Pxw-66	Sichuan (China)	Semi-winter OSR
X106	Cy21Pxw-84	Sichuan (China)	Semi-winter OSR
X108	Cy12Gj-1	Sichuan (China)	Semi-winter OSR
X110	Wx1025	Hunan (China)	Semi-winter OSR
X114	Wx10296	Hunan (China)	Semi-winter OSR
X116	Wx10315	Hunan (China)	Semi-winter OSR
X118	10-1043	Hunan (China)	Semi-winter OSR
X120	10-1047	Hunan (China)	Semi-winter OSR
X122	10-1061	Hunan (China)	Semi-winter OSR
X124	10-1070	Hunan (China)	Semi-winter OSR
X126	10-804	Hunan (China)	Semi-winter OSR
X128	10-1358	Hunan (China)	Semi-winter OSR
X130	1472	Hunan (China)	Mixed type OSR
X132	Xiangyou13	Hunan (China)	Semi-winter OSR
X134	Xiangyou15	Hunan (China)	Semi-winter OSR
X136	Xiangyou11	Hunan (China)	Semi-winter OSR
X138	740	Hunan (China)	Semi-winter OSR
X142	631	Hunan (China)	Semi-winter OSR
X144	613	Hunan (China)	Semi-winter OSR
X146	783	Hunan (China)	Semi-winter OSR
X148	782	Hunan (China)	Mixed type OSR
X150	Yb3	Hunan (China)	Semi-winter OSR
X152	1360	Hunan (China)	Semi-winter OSR
X154	563	Hunan (China)	Semi-winter OSR
X156	Wx10329	Hunan (China)	Semi-winter OSR
X158	Santana	German	Semi-winter OSR
X160	1281	Hunan (China)	Semi-winter OSR
X162	509	Hunan (China)	Mixed type OSR
X164	1368	Hunan (China)	Semi-winter OSR
X166	1322	Hunan (China)	Semi-winter OSR
X168	1252	Hunan (China)	Semi-winter OSR
X170	1321	Hunan (China)	Semi-winter OSR
X172	7022	Hubei (China)	Semi-winter OSR
X174	7094	Hubei (China)	Mixed type OSR
X176	7016	Hubei (China)	Semi-winter OSR
X178	9F087	Hubei (China)	Semi-winter OSR
X180	97096	Hubei (China)	Semi-winter OSR
X182	97097	Hubei (China)	Semi-winter OSR
X184	7189	Hubei (China)	Semi-winter OSR
X186	7191	Hubei (China)	Semi-winter OSR
X188	7037	Hubei (China)	Semi-winter OSR
X190	Rq011	Australia	Semi-winter OSR
X192	Rr009	Australia	Semi-winter OSR
X194	Rr002	Australia	Mixed type OSR
X196	97177	Hubei (China)	Semi-winter OSR
X198	96021	Hubei (China)	Mixed type OSR
X200	96063	Hubei (China)	Semi-winter OSR
X202	1111	Hubei (China)	Semi-winter OSR
X204	1570	Hubei (China)	Semi-winter OSR
X206	9Bao22	Hubei (China)	Semi-winter OSR
X208	1188	Hubei (China)	Semi-winter OSR
X210	2354	Hubei (China)	Semi-winter OSR
X212	2359	Hubei (China)	Semi-winter OSR
X214	2365	Hubei (China)	Semi-winter OSR
X218	93210	Hubei (China)	Semi-winter OSR
X220	Nca	Hubei (China)	Semi-winter OSR
X222	Zhongshuang4	Hubei (China)	Semi-winter OSR
X224	Zhongshuang9	Hubei (China)	Semi-winter OSR
X226	Zhongshuang11	Hubei (China)	Semi-winter OSR
X228	2011-6200	Hubei (China)	Semi-winter OSR
X230	2011-6308	Hubei (China)	Spring OSR
X232	2011-7103	Hubei (China)	Semi-winter OSR
X234	2012-11526	Hubei (China)	Semi-winter OSR
X236	2012-3448	Hubei (China)	Mixed type OSR
X238	2012-3546	Hubei (China)	Semi-winter OSR
X240	2012-4531	Hubei (China)	Mixed type OSR
X242	2012-5086	Hubei (China)	Semi-winter OSR
X244	2012-5113	Hubei (China)	Semi-winter OSR
X246	2012-8327	Hubei (China)	Semi-winter OSR
X248	2012-8355	Hubei (China)	Mixed type OSR
X250	2012-8380	Hubei (China)	Semi-winter OSR
X252	2012-8998	Hubei (China)	Semi-winter OSR
X254	2012-9323	Hubei (China)	Semi-winter OSR
X256	2012-9354	Hubei (China)	Semi-winter OSR
X258	2012-9380	Hubei (China)	Semi-winter OSR
X260	2012-9478	Hubei (China)	Mixed type OSR
X262	2012-9542	Hubei (China)	Semi-winter OSR
X264	2012-K8053	Hubei (China)	Mixed type OSR
X266	R2	Hubei (China)	Mixed type OSR
X268	Xiwang106	Hubei (China)	Semi-winter OSR
X270	Yangguang198	Hubei (China)	Semi-winter OSR
X272	Yangguang209	Hubei (China)	Semi-winter OSR
X274	L134	Hubei (China)	Semi-winter OSR
X276	L135	Hubei (China)	Semi-winter OSR
X278	L136	Hubei (China)	Semi-winter OSR
X280	L137	Hubei (China)	Semi-winter OSR
X282	L138	Hubei (China)	Semi-winter OSR
X284	L139	Hubei (China)	Semi-winter OSR
X286	L140	Hubei (China)	Semi-winter OSR
X288	Huayou2	Hubei (China)	Semi-winter OSR
X290	Major	France	Winter OSR
X292	Huashuang2	Hubei (China)	Semi-winter OSR
X294	Aurora	German	Semi-winter OSR
X296	Huayou13	Hubei (China)	Semi-winter OSR
X298	Rucabo	German	Mixed type OSR
X300	Huayou3	Hubei (China)	Semi-winter OSR
X302	Huayou14	Hubei (China)	Semi-winter OSR
X304	Ningyou1	Jiangsu(China)	Semi-winter OSR
X308	11-9-700	Hubei (China)	Semi-winter OSR
X310	11-9-701	Hubei (China)	Semi-winter OSR
X314	11-9-703	Hubei (China)	Mixed type OSR
X316	11-9-704	Hubei (China)	Semi-winter OSR
X318	11-9-705	Hubei (China)	Mixed type OSR
X320	11-9-706	Hubei (China)	Semi-winter OSR
X322	11-9-707	Hubei (China)	Semi-winter OSR
X324	11-P63-5	Hubei (China)	Semi-winter OSR
X326	11-P63-8	Hubei (China)	Mixed type OSR
X328	11-P63-3	Hubei (China)	Mixed type OSR
X330	11-P67	Hubei (China)	Semi-winter OSR
X334	42666	Hubei (China)	Semi-winter OSR
X336	42667	Hubei (China)	Semi-winter OSR
X338	42668	Hubei (China)	Semi-winter OSR
X340	42672	Hubei (China)	Semi-winter OSR
X342	10-32	Hubei (China)	Mixed type OSR
X344	10-33	Hubei (China)	Semi-winter OSR
X346	10-34	Hubei (China)	Semi-winter OSR
X348	42645	Hubei (China)	Mixed type OSR
X350	42646	Hubei (China)	Semi-winter OSR
X352	11-7-103	Hubei (China)	Semi-winter OSR
X354	11-7-117	Hubei (China)	Semi-winter OSR
X356	11-7-125	Hubei (China)	Semi-winter OSR
X358	11-P74-8	Hubei (China)	Semi-winter OSR
X360	11-P74-13	Hubei (China)	Semi-winter OSR
X362	7-7766-74	Hubei (China)	Semi-winter OSR
X364	P18	Hubei (China)	Semi-winter OSR
X366	23651	Hubei (China)	Mixed type OSR
X368	Shengguang77	Hubei (China)	Semi-winter OSR
X370	Jiayu17	Hubei (China)	Semi-winter OSR
X372	Jiayu25	Hubei (China)	Mixed type OSR
X374	Jiayu16	Hubei (China)	Semi-winter OSR
X376	Jiayu31	Hubei (China)	Mixed type OSR
X378	Huashuang5	Hubei (China)	Semi-winter OSR
X380	Huashuang4	Hubei (China)	Semi-winter OSR
X384	Huashuang128	Hubei (China)	Semi-winter OSR
X386	Jia904	Hubei (China)	Semi-winter OSR
X388	Jia908	Hubei (China)	Semi-winter OSR
X390	Jiapf190	Hubei (China)	Semi-winter OSR
X392	Jia915	Hubei (China)	Semi-winter OSR
X394	Jia922	Hubei (China)	Semi-winter OSR
X396	Jia951	Hubei (China)	Semi-winter OSR
X398	Jia917	Hubei (China)	Mixed type OSR
X400	Jia923	Hubei (China)	Semi-winter OSR
X402	Jia931	Hubei (China)	Semi-winter OSR
X404	Jiayu05	Hubei (China)	Semi-winter OSR
X406	Jia963	Hubei (China)	Mixed type OSR
X408	Huyou17	Shanghai (China)	Semi-winter OSR
X410	Huyou15	Shanghai (China)	Semi-winter OSR
X412	Huyou12	Shanghai (China)	Mixed type OSR
X414	Ningyou18	Jiangsu (China)	Semi-winter OSR
X416	Ningyou16	Jiangsu (China)	Semi-winter OSR
X420	Ningyou12	Jiangsu (China)	Semi-winter OSR
X422	Shilijia	Jiangsu (China)	Semi-winter OSR
X424	Shilifeng	Jiangsu (China)	Semi-winter OSR
X428	Yangyou6	Jiangsu (China)	Semi-winter OSR
X430	Yangyou5	Jiangsu (China)	Semi-winter OSR
X432	Zhengyou3	Jiangsu (China)	Semi-winter OSR
X434	Hongyou3	Jiangsu (China)	Semi-winter OSR
X436	Suyou1	Jiangsu (China)	Semi-winter OSR
X438	Zheyou18	Zhejiang (China)	Semi-winter OSR
X440	Zheshuang72	Zhejiang (China)	Semi-winter OSR
X442	Zheshuang8	Zhejiang (China)	Semi-winter OSR
X444	Zheyou758	Zhejiang (China)	Semi-winter OSR
X446	Huyou14	Shanghai (China)	Semi-winter OSR
X448	Huyou18	Shanghai (China)	Mixed type OSR
X450	Huyou19	Shanghai (China)	Semi-winter OSR
X452	Zheyou19	Zhejiang (China)	Semi-winter OSR
X454	Zheyou21	Zhejiang (China)	Semi-winter OSR
X456	Zheshuang6	Zhejiang (China)	Semi-winter OSR
X458	Wanyou15	Anhui (China)	Semi-winter OSR
X460	Wanyou16	Anhui (China)	Mixed type OSR
X462	Wanyou20	Anhui (China)	Semi-winter OSR
X464	Wanyou29	Anhui (China)	Semi-winter OSR
X466	Agrev012	German	Spring OSR
X468	Agrev019	German	Spring OSR
X470	Agrev021	German	Spring OSR
X472	Topas	Sweden	Spring OSR
X474	Cyclon	United_Kingdom	Spring OSR
X476	We-241	Canada	Spring OSR
X478	Si-242	Canada	Spring OSR
X480	Zh-243	Canada	Semi-winter OSR
X482	Hai-244	Canada	Spring OSR
X484	D2	Danmark	Spring OSR
X486	D3	Danmark	Spring OSR
X488	Q-247	the USA	Spring OSR
X490	11-985	Qinghai (China)	Spring OSR
X492	11-504	Qinghai (China)	Mixed type OSR
X494	11-997	Qinghai (China)	Spring OSR
X496	11-540	Qinghai (China)	Spring OSR
X498	11-1184	Qinghai (China)	Mixed type OSR
X500	10-758	Qinghai (China)	Spring OSR
X502	10-1230	Qinghai (China)	Spring OSR
X504	10-847	Qinghai (China)	Spring OSR
X506	11-1124	Qinghai (China)	Spring OSR
X508	Shan2B	Shanxi (China)	Semi-winter OSR
X510	Kenc1	Shanxi (China)	Winter OSR
X512	P113	Shanxi (China)	Semi-winter OSR
X514	P158	Shanxi (China)	Mixed type OSR
X516	P310	Shanxi (China)	Mixed type OSR
X518	P312	Shanxi (China)	Mixed type OSR
X520	P668	Shanxi (China)	Mixed type OSR
X522	P685	Shanxi (China)	Mixed type OSR
X524	A117	Shanxi (China)	Winter OSR
X526	A172	Shanxi (China)	Winter OSR
X528	B250	Shanxi (China)	Winter OSR
X530	B265	Shanxi (China)	Winter OSR
X532	A109	Shanxi (China)	Winter OSR
X534	B285	Shanxi (China)	Winter OSR
X536	C052	Shanxi (China)	Winter OSR
X538	Gy270	Shanxi (China)	Semi-winter OSR
X540	Gy282	Shanxi (China)	Mixed type OSR
X542	Gy284	Shanxi (China)	Semi-winter OSR
X544	B262	Henan (China)	Winter OSR
X546	A82	Jiangxi (China)	Winter OSR
X548	A98	Shanxi (China)	Winter OSR
X550	B414	Xinjiang (China)	Semi-winter OSR
X554	A97	Sichuan (China)	Mixed type OSR
X556	A148	Sweden	Winter OSR
X558	B431	Danmark	Winter OSR
X560	08-P35	Hubei (China)	Mixed type OSR
X562	08-P36	Hubei (China)	Spring OSR
X564	09-P32	Hubei (China)	Spring OSR
X566	09-P36	Hubei (China)	Mixed type OSR
X568	09-P37	Hubei (China)	Mixed type OSR
X570	10-P10	Hubei (China)	Mixed type OSR
X572	10-P29	Hubei (China)	Mixed type OSR
X574	11-P30	Hubei (China)	Mixed type OSR
X576	12-P24	Hubei (China)	Mixed type OSR
X578	12-P25	Hubei (China)	Semi-winter OSR
X582	03II3B	Gansu (China)	Spring OSR
X584	03I32B	Gansu (China)	Spring OSR
X586	964	Gansu (China)	Spring OSR
X588	Dd1	Gansu (China)	Mixed type OSR
X590	Gl302-1	Gansu (China)	Mixed type OSR
X592	06T9F	Gansu (China)	Mixed type OSR
X594	Longyou2	Gansu (China)	Spring OSR
X596	03II4B	Gansu (China)	Spring OSR
X598	03Lf1	Gansu (China)	Spring OSR
X600	9852	Gansu (China)	Semi-winter OSR
X602	9801C	Gansu (China)	Spring OSR
X604	986	Gansu (China)	Mixed type OSR
X606	876	Gansu (China)	Spring OSR
X608	Wu164	Gansu (China)	Spring OSR
X610	Longyou4	Gansu (China)	Spring OSR
X612	9889	Gansu (China)	Spring OSR
X614	06H7	Gansu (China)	Mixed type OSR
X616	Tianyou4	Gansu (China)	Spring OSR
X618	Swu01	Hubei (China)	Semi-winter OSR
X620	Swu2	Chongqing (China)	Semi-winter OSR
X622	Imc103	Chongqing (China)	Spring OSR
X624	O-136	Chongqing (China)	Mixed type OSR
X626	Sophia	unknown	Spring OSR
X628	Ca-318	German	Spring OSR
X630	Conny	Sweden	Spring OSR
X632	Wesreo	Australia	Spring OSR
X634	Wase Chousen	Japan	Semi-winter OSR
X636	Gogatsuna	Japan	Semi-winter OSR
X638	Nakaee Chousen	Japan	Semi-winter OSR
X640	Cat.No.117	Union of Soviet	Spring OSR
X642	90750	Chongqing (China)	Mixed type OSR
X644	Norin43	Japan	Semi-winter OSR
X648	Youyan2	Guizhou (China)	Semi-winter OSR
X650	Swu39	Sichuan (China)	Mixed type OSR
X654	Swu41	Chongqing (China)	Semi-winter OSR
X656	Swu49	Chongqing (China)	Semi-winter OSR
X658	Swu54	Chongqing (China)	Semi-winter OSR
X660	Swu57	Chongqing (China)	Semi-winter OSR
X662	Swu60	Chongqing (China)	Mixed type OSR
X664	Swu61	Chongqing (China)	Spring OSR
X666	Swu62	Chongqing (China)	Spring OSR
X668	Swu63	Chongqing (China)	Semi-winter OSR
X670	Swu64	Chongqing (China)	Semi-winter OSR
X672	Swu66	Chongqing (China)	Mixed type OSR
X676	Swu68	Chongqing (China)	Semi-winter OSR
X678	Swu69	Chongqing (China)	Semi-winter OSR
X680	Swu70	Chongqing (China)	Semi-winter OSR
X682	Swu71	Chongqing (China)	Mixed type OSR
X684	Swu74	Chongqing (China)	Semi-winter OSR
X686	Swu75	Chongqing (China)	Semi-winter OSR
X688	Swu76	Chongqing (China)	Semi-winter OSR
X690	Swu77	Chongqing (China)	Semi-winter OSR
X692	Swu80	Chongqing (China)	Semi-winter OSR
X694	Swu81	Chongqing (China)	Semi-winter OSR
X696	Swu84	Chongqing (China)	Semi-winter OSR
X698	Swu85	Chongqing (China)	Mixed type OSR
X700	Swu97	Chongqing (China)	Semi-winter OSR
X702	Swu88	Chongqing (China)	Semi-winter OSR
X704	Swu89	Chongqing (China)	Semi-winter OSR
X706	Swu90	Chongqing (China)	Semi-winter OSR
X708	Swu93	Chongqing (China)	Semi-winter OSR
X710	Swu94	Chongqing (China)	Semi-winter OSR
X712	Swu95	Chongqing (China)	Mixed type OSR
X714	Swu96	Chongqing (China)	Semi-winter OSR
X716	Swu99	Chongqing (China)	Semi-winter OSR
X718	Swu100	Chongqing (China)	Semi-winter OSR
X720	Swu102	Chongqing (China)	Semi-winter OSR
X722	Swu103	Chongqing (China)	Semi-winter OSR
X724	Swu104	Chongqing (China)	Semi-winter OSR
X728	Swu107	Chongqing (China)	Semi-winter OSR
X730	Swu110	Chongqing (China)	Semi-winter OSR
X732	Swu111	Chongqing (China)	Semi-winter OSR
X736	Swu113	Chongqing (China)	Semi-winter OSR
X738	Swu114	Chongqing (China)	Semi-winter OSR
X740	Zhongshuang10	Hubei (China)	Semi-winter OSR
X742	Zhongshuang6	Hubei (China)	Semi-winter OSR
X744	Zhongshuang7	Hubei (China)	Semi-winter OSR
X746	Zhongshuang12	Hubei (China)	Semi-winter OSR
X748	Zhongyou589	Hubei (China)	Semi-winter OSR
X750	Fuyou4	Heilongjiang(China)	Mixed type OSR
X752	Zhen3736	Jiangsu (China)	Semi-winter OSR
X754	Zhenyou6	Jiangsu (China)	Semi-winter OSR
X756	Hx0352	Jiangsu (China)	Semi-winter OSR
X758	Yangguang2009	Hubei (China)	Semi-winter OSR
X760	Huyou21	Shanghai (China)	Semi-winter OSR
X762	Zheshuang3	Zhejiang (China)	Mixed type OSR
X764	L385	Zhejiang (China)	Semi-winter OSR
X766	L386	Anhui (China)	Semi-winter OSR
X768	Wanyou12	Anhui (China)	Semi-winter OSR
X770	Wanyou7	Anhui (China)	Semi-winter OSR
X772	L389	Jiangsu (China)	Semi-winter OSR
X774	Zhenyou5	Jiangsu (China)	Semi-winter OSR
X776	Yangyou4	Jiangsu (China)	Mixed type OSR
X778	L392	Shanghai (China)	Semi-winter OSR
X780	L393	Shanghai (China)	Semi-winter OSR
X782	L394	Shanghai (China)	Semi-winter OSR
X784	L395	Shanghai (China)	Semi-winter OSR
X786	L396	Zhejiang (China)	Semi-winter OSR
X788	L397	Zhejiang (China)	Semi-winter OSR
X790	Zheyou50	Zhejiang (China)	Semi-winter OSR
X794	L400	Hubei (China)	Semi-winter OSR
X796	L401	Hubei (China)	Semi-winter OSR
X798	L402	Hubei (China)	Semi-winter OSR
X800	Huahang901	Hubei (China)	Semi-winter OSR
X802	Yangj6711	Jiangsu (China)	Semi-winter OSR
X804	Yan6055	Jiangsu (China)	Semi-winter OSR
X808	L407	Hubei (China)	Semi-winter OSR
X810	Zheyou17	Zhejiang (China)	Semi-winter OSR
X814	Zhongyou821	Hubei (China)	Semi-winter OSR
X816	Qinyou1	Shanxi (China)	Winter OSR
X818	Weilong88	Hubei (China)	Mixed type OSR
X820	Yanyou2	Jiangsu (China)	Mixed type OSR
X822	Qinyou5	Shanxi (China)	Mixed type OSR
X824	Suyou4	Jiangsu (China)	Semi-winter OSR
X826	Fengyou9	Henan (China)	Semi-winter OSR
X828	De68-12	Anhui (China)	Semi-winter OSR
X830	Monty	Australia	Mixed type OSR
X834	L420	Jiangsu (China)	Semi-winter OSR
X836	L421	Jiangsu (China)	Semi-winter OSR
X838	L424	Jiangsu (China)	Semi-winter OSR
X840	Helios	Denmark	Semi-winter OSR
X844	96—203	Qinghai (China)	Semi-winter OSR
X846	Qing662	Hubei (China)	Semi-winter OSR
X848	699	Hubei (China)	Semi-winter OSR
X850	Canadian2	Canada	Semi-winter OSR
X852	Zhongshuang2	Hubei (China)	Semi-winter OSR
X854	Zhongshuang3	Hubei (China)	Semi-winter OSR
X858	Wh-15	Hubei (China)	Mixed type OSR
X860	Wh-17	Hubei (China)	Semi-winter OSR
X862	Wh-19	Hubei (China)	Semi-winter OSR
X864	Wh-20	Hubei (China)	Semi-winter OSR
X866	Wh-23	Hubei (China)	Semi-winter OSR
X868	Wh-24	Hubei (China)	Semi-winter OSR
X872	Wh-26	Hubei (China)	Semi-winter OSR
X876	Wh-28	Hubei (China)	Semi-winter OSR
X878	Wh-29	Hubei (China)	Semi-winter OSR
X880	Wh-30	Hubei (China)	Mixed type OSR
X884	Wh-33	Hubei (China)	Semi-winter OSR
X888	Wh-38	Hubei (China)	Mixed type OSR
X890	Wh-41	Hubei (China)	Mixed type OSR
X892	Wh-42	Hubei (China)	Mixed type OSR
X894	Wh-43	Hubei (China)	Mixed type OSR
X896	Wh-45	Hubei (China)	Spring OSR
X898	Wh-49	Hubei (China)	Mixed type OSR
X900	Wh-50	Hubei (China)	Mixed type OSR
X902	Wh-55	Hubei (China)	Spring OSR
X904	Wh-56	Hubei (China)	Spring OSR
X906	Wh-57	Hubei (China)	Mixed type OSR
X908	Wh-58	Hubei (China)	Mixed type OSR
X910	Wh-59	Hubei (China)	Mixed type OSR
X912	Wh-60	Hubei (China)	Spring OSR
X914	Wh-61	Hubei (China)	Mixed type OSR
X916	Wh-62	Hubei (China)	Mixed type OSR
X918	Wh-63	Hubei (China)	Mixed type OSR
X920	Wh-81	Hubei (China)	Mixed type OSR
X922	Wh-83	Hubei (China)	Mixed type OSR
X924	Wh-85	Hubei (China)	Mixed type OSR
X926	Wh-88	Hubei (China)	Mixed type OSR
X928	Wh-93	Hubei (China)	Spring OSR
X930	Wh-95	Hubei (China)	Mixed type OSR
X932	Wh-100	Hubei (China)	Mixed type OSR
X934	Wh-127	Hubei (China)	Mixed type OSR
X936	Yuyou1	Henan (China)	Semi-winter OSR
X938	Cobra	German	Winter OSR
X940	Ningyou 7	Jiangsu (China)	Semi-winter OSR
X944	Huayou6	Hubei (China)	Semi-winter OSR
X946	Huayou12	Hubei (China)	Mixed type OSR
X948	Cubs Root	Korea	Semi-winter OSR
X950	Huayou10	Hubei (China)	Semi-winter OSR
X952	Bienvenu	France	Winter OSR
X954	Shengliyoucai	Japan	Semi-winter OSR
X956	Erake	Poland	Mixed type OSR
X958	Taisetsu	Japan	Winter OSR
X960	Cresor	France	Spring OSR
X962	Daichousen	Japan	Semi-winter OSR
X964	Comet	Sweden	Spring OSR
X966	Niklas	Denmark	Mixed type OSR
X970	Chuosenshu	Korea	Winter OSR
X972	Wesbrook	Australia	Mixed type OSR
X974	Suigenshu	Korea	Semi-winter OSR
X976	Huayou4	Hubei (China)	Semi-winter OSR
X980	Y2	Shanghai (China)	Semi-winter OSR
X982	Y3	Shanghai (China)	Semi-winter OSR
X984	Y4	Shanghai (China)	Semi-winter OSR
X986	Huyou3	Shanghai (China)	Semi-winter OSR
X988	Y6	Shanghai (China)	Semi-winter OSR
X990	Y7	Shanghai (China)	Winter OSR
X992	Y8	Shanghai (China)	Semi-winter OSR
X994	Caoyou2	Shanghai (China)	Semi-winter OSR
X996	L503	Shanghai (China)	Semi-winter OSR
X998	Y14	Jiangsu (China)	Semi-winter OSR
X1000	Y15	Jiangsu (China)	Spring OSR
X1002	Y16	Jiangsu (China)	Semi-winter OSR
X1004	Y17	Jiangsu (China)	Semi-winter OSR
X1006	L508	Jiangsu (China)	Semi-winter OSR
X1010	Ningyou8	Jiangsu (China)	Mixed type OSR
X1012	Ningyou6	Jiangsu (China)	Mixed type OSR
X1014	Y32	Jiangsu (China)	Semi-winter OSR
X1016	Y33	Japan	Semi-winter OSR
X1018	Huaiyou12	Jiangsu (China)	Mixed type OSR
X1020	Peixuan170	Jiangsu (China)	Semi-winter OSR
X1022	Guangde138	Anhui (China)	Semi-winter OSR
X1024	Guangde8104	Anhui (China)	Semi-winter OSR
X1026	Y38	Anhui (China)	Semi-winter OSR
X1028	Guangde761	Anhui (China)	Semi-winter OSR
X1030	Y40	Anhui (China)	Semi-winter OSR
X1032	Chu610	Anhui (China)	Semi-winter OSR
X1034	Chu107	Anhui (China)	Semi-winter OSR
X1036	Su84-6	Anhui (China)	Semi-winter OSR
X1038	Y44	Anhui (China)	Semi-winter OSR
X1040	Chuyou1	Anhui (China)	Semi-winter OSR
X1042	Y46	Anhui (China)	Mixed type OSR
X1044	Jie65-1	Zhejiang (China)	Semi-winter OSR
X1046	Shenhuang1	Shanghai (China)	Semi-winter OSR
X1048	Zheyou601	Zhejiang (China)	Semi-winter OSR
X1050	Y61	Zhejiang (China)	Semi-winter OSR
X1052	Zaofeng1	Zhejiang (China)	Semi-winter OSR

## Sheet: Table S2
Table S2. Phenotypic characteristics of flowering time of 490 B. napus accessions in eight environments trials
Environmenta	Latitude	Longitude	Planting date	Mean	Std Dev	Minimum	Maximum	CVb (%)	Skewness	Kurtosis
WH2013	30.48	114.35	2012-10-03	157.493	3.79867	146	174	2.41196	0.874248	1.92574
WH2014	30.48	114.35	2013-10-04	153.564	9.60639	94	178	6.25561	-1.56061	5.93156
CS2013	28.2	113.09	2012-09-29	160.274	4.28658	152	186	2.67453	1.36141	6.03461
CS2014	28.2	113.09	2013-09-29	166.548	5.43884	134	191	3.26563	-0.792427	5.79572
NJ2013	31.58	119.18	2012-10-04	160.503	5.59145	147	181	3.4837	0.892534	1.00747
NJ2014	31.58	119.18	2013-09-29	167.546	6.37692	151	189	3.80607	-0.333589	0.390389
CQ2013	29.58	106.55	2012-09-26	151.309	7.8222	102	181	5.16969	-0.221353	4.01094
EZ2013	30.48	114.9	2012-09-28	162.569	5.29729	128	202	3.2585	0.866297	11.4813
a WH: Wuhan, CS: Changsha, NJ: Nanjing, CQ: Chongqin, EZ, Ezhou; b CV: coefficient of variation.

## Sheet: Table S3
Table S3. Climatic data for seven environment trials after planted to the 200 days after planting
Environment	Date	Days after planting	TAVGa	PRCPb
WH2013	2012-10-03	1	69	0
WH2013	2012-10-04	2	68	0
WH2013	2012-10-05	3	66	0.12
WH2013	2012-10-06	4	67	0
WH2013	2012-10-07	5	68	0.02
WH2013	2012-10-08	6	70	0
WH2013	2012-10-09	7	70	0
WH2013	2012-10-10	8	69	0
WH2013	2012-10-11	9	70	0
WH2013	2012-10-12	10	69	0
WH2013	2012-10-13	11	66	0
WH2013	2012-10-14	12	66	0
WH2013	2012-10-15	13	65	0.3
WH2013	2012-10-16	14	65	0.73
WH2013	2012-10-17	15	57	0
WH2013	2012-10-18	16	59	0
WH2013	2012-10-19	17	65	0
WH2013	2012-10-20	18	68	0
WH2013	2012-10-21	19	71	0.39
WH2013	2012-10-22	20	60	0.52
WH2013	2012-10-23	21	56	0
WH2013	2012-10-24	22	59	0.06
WH2013	2012-10-25	23	59	0.16
WH2013	2012-10-26	24	60	0.89
WH2013	2012-10-27	25	61	0
WH2013	2012-10-28	26	61	0
WH2013	2012-10-29	27	61	1.93
WH2013	2012-10-30	28	59	0.04
WH2013	2012-10-31	29	54	0
WH2013	2012-11-01	30	56	0
WH2013	2012-11-02	31	59	0
WH2013	2012-11-03	32	52	0.12
WH2013	2012-11-04	33	50	0
WH2013	2012-11-05	34	49	0
WH2013	2012-11-06	35	48	0
WH2013	2012-11-07	36	51	0
WH2013	2012-11-08	37	55	0.01
WH2013	2012-11-09	38	50	0.07
WH2013	2012-11-10	39	51	0
WH2013	2012-11-11	40	47	0
WH2013	2012-11-12	41	47	0
WH2013	2012-11-13	42	52	0
WH2013	2012-11-14	43	55	0
WH2013	2012-11-15	44	51	0.09
WH2013	2012-11-16	45	48	0.11
WH2013	2012-11-17	46	48	0
WH2013	2012-11-18	47	50	0
WH2013	2012-11-19	48	48	0
WH2013	2012-11-20	49	53	0.04
WH2013	2012-11-21	50	51	0.09
WH2013	2012-11-22	51	51	0.37
WH2013	2012-11-23	52	47	0.15
WH2013	2012-11-24	53	48	0.02
WH2013	2012-11-25	54	47	0.04
WH2013	2012-11-26	55	45	0
WH2013	2012-11-27	56	45	0.01
WH2013	2012-11-28	57	49	0.03
WH2013	2012-11-29	58	49	0.04
WH2013	2012-11-30	59	50	0
WH2013	2012-12-01	60	46	0.12
WH2013	2012-12-02	61	38	0
WH2013	2012-12-03	62	43	0
WH2013	2012-12-04	63	41	0
WH2013	2012-12-05	64	44	0
WH2013	2012-12-06	65	45	0
WH2013	2012-12-07	66	43	0
WH2013	2012-12-08	67	44	0
WH2013	2012-12-09	68	44	0
WH2013	2012-12-10	69	41	0.01
WH2013	2012-12-11	70	41	0
WH2013	2012-12-12	71	41	0
WH2013	2012-12-13	72	47	0.44
WH2013	2012-12-14	73	40	0.18
WH2013	2012-12-15	74	42	0.02
WH2013	2012-12-16	75	43	0
WH2013	2012-12-17	76	42	0.45
WH2013	2012-12-18	77	39	0.1
WH2013	2012-12-19	78	37	0
WH2013	2012-12-20	79	37	0.16
WH2013	2012-12-21	80	36	0.01
WH2013	2012-12-22	81	34	0
WH2013	2012-12-23	82	32	0
WH2013	2012-12-24	83	36	0
WH2013	2012-12-25	84	33	0
WH2013	2012-12-26	85	32	0.11
WH2013	2012-12-27	86	33	0.01
WH2013	2012-12-28	87	35	0
WH2013	2012-12-29	88	34	0.43
WH2013	2012-12-30	89	30	0
WH2013	2012-12-31	90	32	0
WH2013	2013-01-01	91	38	0
WH2013	2013-01-02	92	34	0
WH2013	2013-01-03	93	29	0
WH2013	2013-01-04	94	26	0
WH2013	2013-01-05	95	32	0
WH2013	2013-01-06	96	35	0
WH2013	2013-01-07	97	36	0
WH2013	2013-01-08	98	38	0
WH2013	2013-01-09	99	35	0
WH2013	2013-01-10	100	38	0
WH2013	2013-01-11	101	37	0
WH2013	2013-01-12	102	40	0
WH2013	2013-01-13	103	41	0
WH2013	2013-01-14	104	42	0
WH2013	2013-01-15	105	40	0
WH2013	2013-01-16	106	39	0
WH2013	2013-01-17	107	33	0
WH2013	2013-01-18	108	36	0
WH2013	2013-01-19	109	47	0
WH2013	2013-01-20	110	39	0
WH2013	2013-01-21	111	35	0
WH2013	2013-01-22	112	34	0
WH2013	2013-01-23	113	39	0
WH2013	2013-01-24	114	40	0
WH2013	2013-01-25	115	42	0
WH2013	2013-01-26	116	44	0
WH2013	2013-01-27	117	42	0
WH2013	2013-01-28	118	51	0.02
WH2013	2013-01-29	119	52	0
WH2013	2013-01-30	120	48	0.24
WH2013	2013-01-31	121	45	1.01
WH2013	2013-02-01	122	46	0
WH2013	2013-02-02	123	43	0.01
WH2013	2013-02-03	124	45	0
WH2013	2013-02-04	125	42	0.3
WH2013	2013-02-05	126	39	0.03
WH2013	2013-02-06	127	41	0.01
WH2013	2013-02-07	128	33	0.11
WH2013	2013-02-08	129	29	0.04
WH2013	2013-02-09	130	34	0
WH2013	2013-02-10	131	39	0
WH2013	2013-02-11	132	39	0
WH2013	2013-02-12	133	40	0
WH2013	2013-02-13	134	43	0
WH2013	2013-02-14	135	40	0.05
WH2013	2013-02-15	136	44	0
WH2013	2013-02-16	137	49	0
WH2013	2013-02-17	138	48	0
WH2013	2013-02-18	139	37	0.37
WH2013	2013-02-19	140	37	0
WH2013	2013-02-20	141	40	0
WH2013	2013-02-21	142	41	0
WH2013	2013-02-22	143	45	0
WH2013	2013-02-23	144	50	0
WH2013	2013-02-24	145	51	0
WH2013	2013-02-25	146	54	0.39
WH2013	2013-02-26	147	49	0.09
WH2013	2013-02-27	148	49	0.01
WH2013	2013-02-28	149	55	0.13
WH2013	2013-03-01	150	41	0.05
WH2013	2013-03-02	151	43	0.04
WH2013	2013-03-03	152	49	0
WH2013	2013-03-04	153	56	0
WH2013	2013-03-05	154	60	0
WH2013	2013-03-06	155	65	0
WH2013	2013-03-07	156	63	0
WH2013	2013-03-08	157	69	0
WH2013	2013-03-09	158	71	0
WH2013	2013-03-10	159	50	0
WH2013	2013-03-11	160	51	0
WH2013	2013-03-12	161	51	0.18
WH2013	2013-03-13	162	48	0
WH2013	2013-03-14	163	50	0
WH2013	2013-03-15	164	58	0.09
WH2013	2013-03-16	165	52	1.52
WH2013	2013-03-17	166	50	0.63
WH2013	2013-03-18	167	60	0.6
WH2013	2013-03-19	168	59	0.03
WH2013	2013-03-20	169	51	0
WH2013	2013-03-21	170	58	0
WH2013	2013-03-22	171	61	0.15
WH2013	2013-03-23	172	54	0.05
WH2013	2013-03-24	173	55	0
WH2013	2013-03-25	174	52	0.78
WH2013	2013-03-26	175	48	0
WH2013	2013-03-27	176	56	0
WH2013	2013-03-28	177	61	0
WH2013	2013-03-29	178	64	0
WH2013	2013-03-30	179	62	0
WH2013	2013-03-31	180	62	0
WH2013	2013-04-01	181	65	0
WH2013	2013-04-02	182	65	0
WH2013	2013-04-03	183	62	0
WH2013	2013-04-04	184	67	0.13
WH2013	2013-04-05	185	53	0.3
WH2013	2013-04-06	186	54	0.29
WH2013	2013-04-07	187	61	0
WH2013	2013-04-08	188	64	0
WH2013	2013-04-09	189	54	0
WH2013	2013-04-10	190	59	0
WH2013	2013-04-11	191	64	0
WH2013	2013-04-12	192	69	0
WH2013	2013-04-13	193	71	0
WH2013	2013-04-14	194	72	0
WH2013	2013-04-15	195	78	0
WH2013	2013-04-16	196	74	0
WH2013	2013-04-17	197	76	0
WH2013	2013-04-18	198	63	0.03
WH2013	2013-04-19	199	49	0.59
WH2013	2013-04-20	200	47	0
WH2014	2013-10-04	1	67	0
WH2014	2013-10-05	2	71	0
WH2014	2013-10-06	3	72	0
WH2014	2013-10-07	4	75	0
WH2014	2013-10-08	5	71	0
WH2014	2013-10-09	6	72	0
WH2014	2013-10-10	7	74	0
WH2014	2013-10-11	8	75	0
WH2014	2013-10-12	9	76	0
WH2014	2013-10-13	10	74	0
WH2014	2013-10-14	11	69	0
WH2014	2013-10-15	12	59	0
WH2014	2013-10-16	13	56	0
WH2014	2013-10-17	14	58	0
WH2014	2013-10-18	15	63	0
WH2014	2013-10-19	16	63	0
WH2014	2013-10-20	17	66	0
WH2014	2013-10-21	18	63	0
WH2014	2013-10-22	19	63	0
WH2014	2013-10-23	20	66	0
WH2014	2013-10-24	21	64	0
WH2014	2013-10-25	22	57	0
WH2014	2013-10-26	23	56	0
WH2014	2013-10-27	24	62	0
WH2014	2013-10-28	25	65	0
WH2014	2013-10-29	26	66	0
WH2014	2013-10-30	27	60	0.22
WH2014	2013-10-31	28	61	0
WH2014	2013-11-01	29	58	0.69
WH2014	2013-11-02	30	56	0.2
WH2014	2013-11-03	31	61	0.16
WH2014	2013-11-04	32	58	0
WH2014	2013-11-05	33	59	0
WH2014	2013-11-06	34	59	0
WH2014	2013-11-07	35	63	0
WH2014	2013-11-08	36	67	0
WH2014	2013-11-09	37	63	0.18
WH2014	2013-11-10	38	56	0.02
WH2014	2013-11-11	39	53	0.27
WH2014	2013-11-12	40	50	0.25
WH2014	2013-11-13	41	53	0.05
WH2014	2013-11-14	42	53	0.01
WH2014	2013-11-15	43	54	0
WH2014	2013-11-16	44	55	0
WH2014	2013-11-17	45	53	0
WH2014	2013-11-18	46	51	0
WH2014	2013-11-19	47	54	0
WH2014	2013-11-20	48	59	0
WH2014	2013-11-21	49	57	0
WH2014	2013-11-22	50	55	0
WH2014	2013-11-23	51	53	0.4
WH2014	2013-11-24	52	48	0.15
WH2014	2013-11-25	53	51	0.02
WH2014	2013-11-26	54	51	0
WH2014	2013-11-27	55	42	0
WH2014	2013-11-28	56	41	0
WH2014	2013-11-29	57	44	0
WH2014	2013-11-30	58	46	0
WH2014	2013-12-01	59	49	0
WH2014	2013-12-02	60	52	0
WH2014	2013-12-03	61	50	0
WH2014	2013-12-04	62	49	0
WH2014	2013-12-05	63	49	0
WH2014	2013-12-06	64	45	0
WH2014	2013-12-07	65	50	0
WH2014	2013-12-08	66	54	0.05
WH2014	2013-12-09	67	44	0
WH2014	2013-12-10	68	45	0
WH2014	2013-12-11	69	43	0
WH2014	2013-12-12	70	44	0
WH2014	2013-12-13	71	45	0
WH2014	2013-12-14	72	48	0
WH2014	2013-12-15	73	50	0
WH2014	2013-12-16	74	45	0.01
WH2014	2013-12-17	75	40	0
WH2014	2013-12-18	76	37	0
WH2014	2013-12-19	77	37	0
WH2014	2013-12-20	78	36	0
WH2014	2013-12-21	79	34	0
WH2014	2013-12-22	80	35	0
WH2014	2013-12-23	81	37	0
WH2014	2013-12-24	82	38	0
WH2014	2013-12-25	83	42	0
WH2014	2013-12-26	84	36	0
WH2014	2013-12-27	85	31	0
WH2014	2013-12-28	86	34	0
WH2014	2013-12-29	87	37	0
WH2014	2013-12-30	88	40	0
WH2014	2013-12-31	89	45	0
WH2014	2014-01-01	90	48	0
WH2014	2014-01-02	91	47	0
WH2014	2014-01-03	92	44	0
WH2014	2014-01-04	93	44	0
WH2014	2014-01-05	94	49	0
WH2014	2014-01-06	95	45	0.09
WH2014	2014-01-07	96	41	0.66
WH2014	2014-01-08	97	39	0.34
WH2014	2014-01-09	98	39	0
WH2014	2014-01-10	99	40	0.19
WH2014	2014-01-11	100	39	0.04
WH2014	2014-01-12	101	40	0
WH2014	2014-01-13	102	39	0
WH2014	2014-01-14	103	39	0
WH2014	2014-01-15	104	41	0
WH2014	2014-01-16	105	45	0
WH2014	2014-01-17	106	42	0
WH2014	2014-01-18	107	40	0
WH2014	2014-01-19	108	42	0
WH2014	2014-01-20	109	42	0
WH2014	2014-01-21	110	39	0
WH2014	2014-01-22	111	44	0
WH2014	2014-01-23	112	51	0
WH2014	2014-01-24	113	55	0
WH2014	2014-01-25	114	48	0
WH2014	2014-01-26	115	47	0
WH2014	2014-01-27	116	48	0
WH2014	2014-01-28	117	47	0.48
WH2014	2014-01-29	118	45	0.01
WH2014	2014-01-30	119	52	0
WH2014	2014-01-31	120	64	0
WH2014	2014-02-01	121	54	0
WH2014	2014-02-02	122	55	0
WH2014	2014-02-03	123	44	0
WH2014	2014-02-04	124	40	0.06
WH2014	2014-02-05	125	34	0.33
WH2014	2014-02-06	126	35	0.68
WH2014	2014-02-07	127	34	0.09
WH2014	2014-02-08	128	34	0.02
WH2014	2014-02-09	129	31	0.06
WH2014	2014-02-10	130	28	0.03
WH2014	2014-02-11	131	31	0
WH2014	2014-02-12	132	34	0
WH2014	2014-02-13	133	32	0
WH2014	2014-02-14	134	37	0
WH2014	2014-02-15	135	42	0
WH2014	2014-02-16	136	40	0.01
WH2014	2014-02-17	137	36	0.41
WH2014	2014-02-18	138	33	0.04
WH2014	2014-02-19	139	37	0.09
WH2014	2014-02-20	140	45	0
WH2014	2014-02-21	141	51	0
WH2014	2014-02-22	142	53	0
WH2014	2014-02-23	143	53	0.09
WH2014	2014-02-24	144	49	0.66
WH2014	2014-02-25	145	48	0
WH2014	2014-02-26	146	52	0
WH2014	2014-02-27	147	49	0.76
WH2014	2014-02-28	148	44	0.51
WH2014	2014-03-01	149	42	0.06
WH2014	2014-03-02	150	44	0
WH2014	2014-03-03	151	48	0
WH2014	2014-03-04	152	50	0
WH2014	2014-03-05	153	54	0
WH2014	2014-03-06	154	47	0.12
WH2014	2014-03-07	155	46	0.04
WH2014	2014-03-08	156	48	0
WH2014	2014-03-09	157	52	0
WH2014	2014-03-10	158	55	0
WH2014	2014-03-11	159	55	0.02
WH2014	2014-03-12	160	49	0
WH2014	2014-03-13	161	47	0
WH2014	2014-03-14	162	54	0
WH2014	2014-03-15	163	57	0
WH2014	2014-03-16	164	62	0
WH2014	2014-03-17	165	69	0
WH2014	2014-03-18	166	67	0.06
WH2014	2014-03-19	167	54	0.99
WH2014	2014-03-20	168	49	0
WH2014	2014-03-21	169	52	0
WH2014	2014-03-22	170	58	0
WH2014	2014-03-23	171	58	0.02
WH2014	2014-03-24	172	59	0.38
WH2014	2014-03-25	173	62	0
WH2014	2014-03-26	174	67	0
WH2014	2014-03-27	175	72	0
WH2014	2014-03-28	176	72	1.92
WH2014	2014-03-29	177	70	0
WH2014	2014-03-30	178	69	0.01
WH2014	2014-03-31	179	60	0
WH2014	2014-04-01	180	62	0
WH2014	2014-04-02	181	67	0
WH2014	2014-04-03	182	66	0
WH2014	2014-04-04	183	64	0
WH2014	2014-04-05	184	65	0.02
WH2014	2014-04-06	185	59	0.01
WH2014	2014-04-07	186	61	0
WH2014	2014-04-08	187	66	0
WH2014	2014-04-09	188	72	0
WH2014	2014-04-10	189	70	0.01
WH2014	2014-04-11	190	62	1.26
WH2014	2014-04-12	191	56	0.1
WH2014	2014-04-13	192	61	0.09
WH2014	2014-04-14	193	68	0.05
WH2014	2014-04-15	194	63	0.76
WH2014	2014-04-16	195	60	0.94
WH2014	2014-04-17	196	66	0.03
WH2014	2014-04-18	197	65	0.18
WH2014	2014-04-19	198	59	0.02
WH2014	2014-04-20	199	61	0.56
WH2014	2014-04-21	200	59	1.43
CS2013	2012-09-29	1	70	0
CS2013	2012-09-30	2	71	0
CS2013	2012-10-01	3	72	0
CS2013	2012-10-02	4	73	0
CS2013	2012-10-03	5	72	0
CS2013	2012-10-04	6	68	0
CS2013	2012-10-05	7	65	0
CS2013	2012-10-06	8	66	0.06
CS2013	2012-10-07	9	70	0
CS2013	2012-10-08	10	67	0
CS2013	2012-10-09	11	66	0.01
CS2013	2012-10-10	12	70	0
CS2013	2012-10-11	13	71	0
CS2013	2012-10-12	14	72	0
CS2013	2012-10-13	15	66	0.01
CS2013	2012-10-14	16	64	0.01
CS2013	2012-10-15	17	69	0
CS2013	2012-10-16	18	66	0.33
CS2013	2012-10-17	19	66	0
CS2013	2012-10-18	20	66	0
CS2013	2012-10-19	21	71	0
CS2013	2012-10-20	22	74	0
CS2013	2012-10-21	23	74	0.2
CS2013	2012-10-22	24	65	0.5
CS2013	2012-10-23	25	64	0
CS2013	2012-10-24	26	62	0
CS2013	2012-10-25	27	62	0
CS2013	2012-10-26	28	63	0
CS2013	2012-10-27	29	63	0
CS2013	2012-10-28	30	65	0
CS2013	2012-10-29	31	65	1.03
CS2013	2012-10-30	32	62	0.17
CS2013	2012-10-31	33	62	0
CS2013	2012-11-01	34	61	0
CS2013	2012-11-02	35	64	0
CS2013	2012-11-03	36	60	0.1
CS2013	2012-11-04	37	58	0
CS2013	2012-11-05	38	60	0.01
CS2013	2012-11-06	39	60	0
CS2013	2012-11-07	40	57	0.06
CS2013	2012-11-08	41	54	1.09
CS2013	2012-11-09	42	55	0.61
CS2013	2012-11-10	43	54	0.78
CS2013	2012-11-11	44	56	0
CS2013	2012-11-12	45	55	0
CS2013	2012-11-13	46	58	0
CS2013	2012-11-14	47	59	0
CS2013	2012-11-15	48	53	0.35
CS2013	2012-11-16	49	47	1.25
CS2013	2012-11-17	50	49	0
CS2013	2012-11-18	51	50	0
CS2013	2012-11-19	52	51	0
CS2013	2012-11-20	53	54	0
CS2013	2012-11-21	54	53	0.03
CS2013	2012-11-22	55	52	0.44
CS2013	2012-11-23	56	50	0.08
CS2013	2012-11-24	57	50	0
CS2013	2012-11-25	58	49	0.16
CS2013	2012-11-26	59	51	0
CS2013	2012-11-27	60	49	0
CS2013	2012-11-28	61	51	0.32
CS2013	2012-11-29	62	49	0
CS2013	2012-11-30	63	48	0.01
CS2013	2012-12-01	64	48	0.54
CS2013	2012-12-02	65	43	0
CS2013	2012-12-03	66	45	0
CS2013	2012-12-04	67	48	0
CS2013	2012-12-05	68	50	0
CS2013	2012-12-06	69	51	0
CS2013	2012-12-07	70	52	0
CS2013	2012-12-08	71	53	0
CS2013	2012-12-09	72	46	0.01
CS2013	2012-12-10	73	43	0.26
CS2013	2012-12-11	74	44	0.01
CS2013	2012-12-12	75	45	0
CS2013	2012-12-13	76	50	0
CS2013	2012-12-14	77	45	0
CS2013	2012-12-15	78	42	0.08
CS2013	2012-12-16	79	45	0
CS2013	2012-12-17	80	44	0.29
CS2013	2012-12-18	81	40	0.21
CS2013	2012-12-19	82	42	0.08
CS2013	2012-12-20	83	41	0.3
CS2013	2012-12-21	84	38	0.22
CS2013	2012-12-22	85	40	0.01
CS2013	2012-12-23	86	39	0
CS2013	2012-12-24	87	40	0
CS2013	2012-12-25	88	40	0
CS2013	2012-12-26	89	34	0.52
CS2013	2012-12-27	90	33	0.57
CS2013	2012-12-28	91	35	0.02
CS2013	2012-12-29	92	36	0.61
CS2013	2012-12-30	93	35	0
CS2013	2012-12-31	94	37	0
CS2013	2013-01-01	95	44	0
CS2013	2013-01-02	96	39	0
CS2013	2013-01-03	97	32	0.1
CS2013	2013-01-04	98	28	0.19
CS2013	2013-01-05	99	30	0.02
CS2013	2013-01-06	100	33	0
CS2013	2013-01-07	101	35	0
CS2013	2013-01-08	102	37	0
CS2013	2013-01-09	103	38	0
CS2013	2013-01-10	104	42	0
CS2013	2013-01-11	105	43	0
CS2013	2013-01-12	106	41	0
CS2013	2013-01-13	107	44	0
CS2013	2013-01-14	108	47	0.14
CS2013	2013-01-15	109	47	0.19
CS2013	2013-01-16	110	48	0.04
CS2013	2013-01-17	111	40	0
CS2013	2013-01-18	112	41	0
CS2013	2013-01-19	113	49	0
CS2013	2013-01-20	114	43	0
CS2013	2013-01-21	115	39	0.01
CS2013	2013-01-22	116	39	0.09
CS2013	2013-01-23	117	42	0.09
CS2013	2013-01-24	118	44	0.01
CS2013	2013-01-25	119	45	0
CS2013	2013-01-26	120	51	0
CS2013	2013-01-27	121	49	0
CS2013	2013-01-28	122	52	0.02
CS2013	2013-01-29	123	56	0
CS2013	2013-01-30	124	60	0
CS2013	2013-01-31	125	55	0.03
CS2013	2013-02-01	126	51	0.02
CS2013	2013-02-02	127	45	0.11
CS2013	2013-02-03	128	52	0
CS2013	2013-02-04	129	44	0
CS2013	2013-02-05	130	44	0
CS2013	2013-02-06	131	44	0.35
CS2013	2013-02-07	132	38	0.54
CS2013	2013-02-08	133	30	0.17
CS2013	2013-02-09	134	34	0.11
CS2013	2013-02-10	135	40	0.01
CS2013	2013-02-11	136	40	0.17
CS2013	2013-02-12	137	41	0
CS2013	2013-02-13	138	43	0.1
CS2013	2013-02-14	139	43	0.07
CS2013	2013-02-15	140	45	0.04
CS2013	2013-02-16	141	50	0.01
CS2013	2013-02-17	142	49	0.2
CS2013	2013-02-18	143	43	0.6
CS2013	2013-02-19	144	38	0.18
CS2013	2013-02-20	145	41	0.12
CS2013	2013-02-21	146	42	0.78
CS2013	2013-02-22	147	47	0.64
CS2013	2013-02-23	148	51	0
CS2013	2013-02-24	149	53	0
CS2013	2013-02-25	150	54	0.01
CS2013	2013-02-26	151	51	0.24
CS2013	2013-02-27	152	56	0
CS2013	2013-02-28	153	64	0
CS2013	2013-03-01	154	42	0.38
CS2013	2013-03-02	155	44	0
CS2013	2013-03-03	156	51	0
CS2013	2013-03-04	157	57	0
CS2013	2013-03-05	158	62	0
CS2013	2013-03-06	159	66	0
CS2013	2013-03-07	160	67	0
CS2013	2013-03-08	161	74	0
CS2013	2013-03-09	162	75	0
CS2013	2013-03-10	163	53	0.13
CS2013	2013-03-11	164	55	0
CS2013	2013-03-12	165	59	0.78
CS2013	2013-03-13	166	53	0
CS2013	2013-03-14	167	52	0
CS2013	2013-03-15	168	59	0.06
CS2013	2013-03-16	169	59	0
CS2013	2013-03-17	170	53	1.21
CS2013	2013-03-18	171	63	0
CS2013	2013-03-19	172	60	0.3
CS2013	2013-03-20	173	60	0
CS2013	2013-03-21	174	64	0
CS2013	2013-03-22	175	65	0.11
CS2013	2013-03-23	176	56	1.05
CS2013	2013-03-24	177	59	0
CS2013	2013-03-25	178	59	0.93
CS2013	2013-03-26	179	49	0.04
CS2013	2013-03-27	180	58	0.02
CS2013	2013-03-28	181	62	0.13
CS2013	2013-03-29	182	67	0
CS2013	2013-03-30	183	62	0.01
CS2013	2013-03-31	184	61	0
CS2013	2013-04-01	185	64	0
CS2013	2013-04-02	186	66	0.02
CS2013	2013-04-03	187	62	0.05
CS2013	2013-04-04	188	63	3.22
CS2013	2013-04-05	189	56	0.91
CS2013	2013-04-06	190	55	0.9
CS2013	2013-04-07	191	63	0
CS2013	2013-04-08	192	62	0
CS2013	2013-04-09	193	59	0.14
CS2013	2013-04-10	194	61	0
CS2013	2013-04-11	195	63	0
CS2013	2013-04-12	196	67	0
CS2013	2013-04-13	197	65	0
CS2013	2013-04-14	198	73	0
CS2013	2013-04-15	199	78	0
CS2013	2013-04-16	200	78	0
CS2014	2013-09-29	1	72	0
CS2014	2013-09-30	2	75	0
CS2014	2013-10-01	3	75	0
CS2014	2013-10-02	4	76	0
CS2014	2013-10-03	5	72	0
CS2014	2013-10-04	6	72	0
CS2014	2013-10-05	7	72	0
CS2014	2013-10-06	8	73	0
CS2014	2013-10-07	9	74	0
CS2014	2013-10-08	10	74	0
CS2014	2013-10-09	11	75	0
CS2014	2013-10-10	12	77	0
CS2014	2013-10-11	13	78	0
CS2014	2013-10-12	14	80	0
CS2014	2013-10-13	15	79	0
CS2014	2013-10-14	16	77	0
CS2014	2013-10-15	17	63	0
CS2014	2013-10-16	18	61	0
CS2014	2013-10-17	19	56	0
CS2014	2013-10-18	20	59	0
CS2014	2013-10-19	21	62	0
CS2014	2013-10-20	22	66	0
CS2014	2013-10-21	23	65	0
CS2014	2013-10-22	24	67	0
CS2014	2013-10-23	25	69	0
CS2014	2013-10-24	26	70	0
CS2014	2013-10-25	27	62	0
CS2014	2013-10-26	28	61	0
CS2014	2013-10-27	29	67	0
CS2014	2013-10-28	30	68	0
CS2014	2013-10-29	31	71	0.01
CS2014	2013-10-30	32	63	0.17
CS2014	2013-10-31	33	64	0
CS2014	2013-11-01	34	60	0.03
CS2014	2013-11-02	35	59	0.02
CS2014	2013-11-03	36	61	0
CS2014	2013-11-04	37	63	0
CS2014	2013-11-05	38	63	0
CS2014	2013-11-06	39	65	0
CS2014	2013-11-07	40	68	0
CS2014	2013-11-08	41	76	0
CS2014	2013-11-09	42	71	0
CS2014	2013-11-10	43	57	0.48
CS2014	2013-11-11	44	53	2.45
CS2014	2013-11-12	45	48	1.12
CS2014	2013-11-13	46	50	0
CS2014	2013-11-14	47	53	0
CS2014	2013-11-15	48	56	0
CS2014	2013-11-16	49	59	0
CS2014	2013-11-17	50	60	0
CS2014	2013-11-18	51	58	0
CS2014	2013-11-19	52	60	0
CS2014	2013-11-20	53	62	0
CS2014	2013-11-21	54	63	0
CS2014	2013-11-22	55	56	0
CS2014	2013-11-23	56	56	0.4
CS2014	2013-11-24	57	50	0.39
CS2014	2013-11-25	58	55	0.13
CS2014	2013-11-26	59	56	0
CS2014	2013-11-27	60	52	0
CS2014	2013-11-28	61	49	0
CS2014	2013-11-29	62	50	0
CS2014	2013-11-30	63	52	0
CS2014	2013-12-01	64	54	0
CS2014	2013-12-02	65	58	0
CS2014	2013-12-03	66	59	0
CS2014	2013-12-04	67	55	0
CS2014	2013-12-05	68	53	0
CS2014	2013-12-06	69	50	0
CS2014	2013-12-07	70	55	0
CS2014	2013-12-08	71	58	0
CS2014	2013-12-09	72	51	0
CS2014	2013-12-10	73	50	0
CS2014	2013-12-11	74	51	0
CS2014	2013-12-12	75	49	0
CS2014	2013-12-13	76	51	0
CS2014	2013-12-14	77	49	0.2
CS2014	2013-12-15	78	47	0.3
CS2014	2013-12-16	79	44	0.46
CS2014	2013-12-17	80	43	0.12
CS2014	2013-12-18	81	43	0.06
CS2014	2013-12-19	82	42	0
CS2014	2013-12-20	83	42	0
CS2014	2013-12-21	84	39	0
CS2014	2013-12-22	85	42	0
CS2014	2013-12-23	86	43	0
CS2014	2013-12-24	87	43	0
CS2014	2013-12-25	88	46	0
CS2014	2013-12-26	89	43	0
CS2014	2013-12-27	90	37	0
CS2014	2013-12-28	91	39	0
CS2014	2013-12-29	92	44	0
CS2014	2013-12-30	93	45	0
CS2014	2013-12-31	94	48	0
CS2014	2014-01-01	95	51	0
CS2014	2014-01-02	96	54	0
CS2014	2014-01-03	97	50	0
CS2014	2014-01-04	98	49	0
CS2014	2014-01-05	99	55	0
CS2014	2014-01-06	100	50	0
CS2014	2014-01-07	101	43	0.24
CS2014	2014-01-08	102	44	0.23
CS2014	2014-01-09	103	43	0
CS2014	2014-01-10	104	42	0.24
CS2014	2014-01-11	105	40	0.11
CS2014	2014-01-12	106	43	0.02
CS2014	2014-01-13	107	42	0
CS2014	2014-01-14	108	45	0
CS2014	2014-01-15	109	44	0
CS2014	2014-01-16	110	48	0
CS2014	2014-01-17	111	49	0
CS2014	2014-01-18	112	47	0
CS2014	2014-01-19	113	50	0
CS2014	2014-01-20	114	48	0
CS2014	2014-01-21	115	48	0
CS2014	2014-01-22	116	50	0
CS2014	2014-01-23	117	55	0
CS2014	2014-01-24	118	59	0
CS2014	2014-01-25	119	53	0
CS2014	2014-01-26	120	47	0
CS2014	2014-01-27	121	53	0
CS2014	2014-01-28	122	50	0
CS2014	2014-01-29	123	47	0
CS2014	2014-01-30	124	59	0
CS2014	2014-01-31	125	68	0
CS2014	2014-02-01	126	67	0
CS2014	2014-02-02	127	65	0
CS2014	2014-02-03	128	50	0
CS2014	2014-02-04	129	43	0.08
CS2014	2014-02-05	130	37	0.07
CS2014	2014-02-06	131	35	0.07
CS2014	2014-02-07	132	35	0.07
CS2014	2014-02-08	133	36	0
CS2014	2014-02-09	134	33	0.58
CS2014	2014-02-10	135	30	0.01
CS2014	2014-02-11	136	33	0
CS2014	2014-02-12	137	34	0.04
CS2014	2014-02-13	138	33	0.06
CS2014	2014-02-14	139	38	0
CS2014	2014-02-15	140	42	0
CS2014	2014-02-16	141	41	0.06
CS2014	2014-02-17	142	39	0.23
CS2014	2014-02-18	143	35	0.18
CS2014	2014-02-19	144	40	0.16
CS2014	2014-02-20	145	48	0
CS2014	2014-02-21	146	53	0
CS2014	2014-02-22	147	53	0
CS2014	2014-02-23	148	51	0.55
CS2014	2014-02-24	149	50	1.02
CS2014	2014-02-25	150	49	0.5
CS2014	2014-02-26	151	53	0.44
CS2014	2014-02-27	152	52	0.31
CS2014	2014-02-28	153	46	0.28
CS2014	2014-03-01	154	43	0.15
CS2014	2014-03-02	155	44	0.08
CS2014	2014-03-03	156	46	0.1
CS2014	2014-03-04	157	48	0
CS2014	2014-03-05	158	52	0.29
CS2014	2014-03-06	159	49	0.2
CS2014	2014-03-07	160	45	1.33
CS2014	2014-03-08	161	44	0
CS2014	2014-03-09	162	51	0
CS2014	2014-03-10	163	54	0
CS2014	2014-03-11	164	53	1.04
CS2014	2014-03-12	165	53	0
CS2014	2014-03-13	166	47	0
CS2014	2014-03-14	167	53	0
CS2014	2014-03-15	168	56	0
CS2014	2014-03-16	169	62	0
CS2014	2014-03-17	170	72	0
CS2014	2014-03-18	171	75	0.01
CS2014	2014-03-19	172	57	1.22
CS2014	2014-03-20	173	51	0.05
CS2014	2014-03-21	174	54	0.03
CS2014	2014-03-22	175	58	0.01
CS2014	2014-03-23	176	56	0.4
CS2014	2014-03-24	177	61	0.76
CS2014	2014-03-25	178	69	0.73
CS2014	2014-03-26	179	70	0.09
CS2014	2014-03-27	180	67	0.77
CS2014	2014-03-28	181	68	1.06
CS2014	2014-03-29	182	72	1.03
CS2014	2014-03-30	183	64	0.71
CS2014	2014-03-31	184	63	0.69
CS2014	2014-04-01	185	63	0
CS2014	2014-04-02	186	65	0
CS2014	2014-04-03	187	68	0
CS2014	2014-04-04	188	66	0
CS2014	2014-04-05	189	70	0.39
CS2014	2014-04-06	190	60	0.95
CS2014	2014-04-07	191	61	0.18
CS2014	2014-04-08	192	66	0.09
CS2014	2014-04-09	193	74	0
CS2014	2014-04-10	194	76	0
CS2014	2014-04-11	195	72	0
CS2014	2014-04-12	196	58	0.02
CS2014	2014-04-13	197	63	0.02
CS2014	2014-04-14	198	70	0.01
CS2014	2014-04-15	199	75	0
CS2014	2014-04-16	200	67	0
NJ2013	2012-10-04	1	68	0
NJ2013	2012-10-05	2	69	0
NJ2013	2012-10-06	3	70	0
NJ2013	2012-10-07	4	70	0
NJ2013	2012-10-08	5	68	0
NJ2013	2012-10-09	6	68	0
NJ2013	2012-10-10	7	68	0
NJ2013	2012-10-11	8	66	0
NJ2013	2012-10-12	9	66	0
NJ2013	2012-10-13	10	67	0
NJ2013	2012-10-14	11	70	0
NJ2013	2012-10-15	12	70	0
NJ2013	2012-10-16	13	65	0.17
NJ2013	2012-10-17	14	62	0.02
NJ2013	2012-10-18	15	58	0
NJ2013	2012-10-19	16	62	0
NJ2013	2012-10-20	17	68	0
NJ2013	2012-10-21	18	71	0
NJ2013	2012-10-22	19	63	0.7
NJ2013	2012-10-23	20	58	0
NJ2013	2012-10-24	21	60	0
NJ2013	2012-10-25	22	63	0
NJ2013	2012-10-26	23	67	0.28
NJ2013	2012-10-27	24	65	0.77
NJ2013	2012-10-28	25	60	0
NJ2013	2012-10-29	26	60	0.09
NJ2013	2012-10-30	27	57	0.12
NJ2013	2012-10-31	28	55	0
NJ2013	2012-11-01	29	54	0
NJ2013	2012-11-02	30	58	0
NJ2013	2012-11-03	31	59	0.08
NJ2013	2012-11-04	32	52	0.04
NJ2013	2012-11-05	33	49	0
NJ2013	2012-11-06	34	49	0
NJ2013	2012-11-07	35	52	0
NJ2013	2012-11-08	36	55	0.05
NJ2013	2012-11-09	37	54	0.21
NJ2013	2012-11-10	38	56	0.13
NJ2013	2012-11-11	39	51	0
NJ2013	2012-11-12	40	49	0
NJ2013	2012-11-13	41	50	0
NJ2013	2012-11-14	42	47	0
NJ2013	2012-11-15	43	48	0
NJ2013	2012-11-16	44	50	0.03
NJ2013	2012-11-17	45	48	0
NJ2013	2012-11-18	46	49	0
NJ2013	2012-11-19	47	51	0
NJ2013	2012-11-20	48	52	0
NJ2013	2012-11-21	49	52	0.23
NJ2013	2012-11-22	50	52	0.49
NJ2013	2012-11-23	51	46	0.08
NJ2013	2012-11-24	52	42	0
NJ2013	2012-11-25	53	45	0.3
NJ2013	2012-11-26	54	42	0
NJ2013	2012-11-27	55	42	0
NJ2013	2012-11-28	56	50	0
NJ2013	2012-11-29	57	48	0
NJ2013	2012-11-30	58	49	0.04
NJ2013	2012-12-01	59	44	0.06
NJ2013	2012-12-02	60	43	0.34
NJ2013	2012-12-03	61	45	0
NJ2013	2012-12-04	62	40	0
NJ2013	2012-12-05	63	44	0
NJ2013	2012-12-06	64	39	0
NJ2013	2012-12-07	65	43	0
NJ2013	2012-12-08	66	39	0
NJ2013	2012-12-09	67	34	0
NJ2013	2012-12-10	68	36	0
NJ2013	2012-12-11	69	38	0
NJ2013	2012-12-12	70	40	0
NJ2013	2012-12-13	71	47	0
NJ2013	2012-12-14	72	45	0.13
NJ2013	2012-12-15	73	41	0.44
NJ2013	2012-12-16	74	45	0.01
NJ2013	2012-12-17	75	43	0
NJ2013	2012-12-18	76	35	0
NJ2013	2012-12-19	77	32	0
NJ2013	2012-12-20	78	40	0.28
NJ2013	2012-12-21	79	38	0.16
NJ2013	2012-12-22	80	37	0.08
NJ2013	2012-12-23	81	30	0
NJ2013	2012-12-24	82	30	0
NJ2013	2012-12-25	83	35	0
NJ2013	2012-12-26	84	34	0.19
NJ2013	2012-12-27	85	37	0.35
NJ2013	2012-12-28	86	38	0.1
NJ2013	2012-12-29	87	35	0.48
NJ2013	2012-12-30	88	28	0
NJ2013	2012-12-31	89	31	0
NJ2013	2013-01-01	90	38	0
NJ2013	2013-01-02	91	31	0
NJ2013	2013-01-03	92	27	0
NJ2013	2013-01-04	93	29	0
NJ2013	2013-01-05	94	33	0
NJ2013	2013-01-06	95	34	0
NJ2013	2013-01-07	96	33	0
NJ2013	2013-01-08	97	35	0
NJ2013	2013-01-09	98	34	0
NJ2013	2013-01-10	99	33	0
NJ2013	2013-01-11	100	36	0
NJ2013	2013-01-12	101	42	0
NJ2013	2013-01-13	102	41	0
NJ2013	2013-01-14	103	39	0
NJ2013	2013-01-15	104	38	0
NJ2013	2013-01-16	105	35	0
NJ2013	2013-01-17	106	29	0
NJ2013	2013-01-18	107	31	0
NJ2013	2013-01-19	108	42	0
NJ2013	2013-01-20	109	44	0.09
NJ2013	2013-01-21	110	36	0.11
NJ2013	2013-01-22	111	37	0.01
NJ2013	2013-01-23	112	38	0
NJ2013	2013-01-24	113	36	0
NJ2013	2013-01-25	114	34	0
NJ2013	2013-01-26	115	41	0
NJ2013	2013-01-27	116	38	0
NJ2013	2013-01-28	117	45	0
NJ2013	2013-01-29	118	47	0
NJ2013	2013-01-30	119	53	0.06
NJ2013	2013-01-31	120	54	1.09
NJ2013	2013-02-01	121	47	0.01
NJ2013	2013-02-02	122	43	0
NJ2013	2013-02-03	123	48	0.12
NJ2013	2013-02-04	124	43	0.33
NJ2013	2013-02-05	125	39	0.12
NJ2013	2013-02-06	126	38	0
NJ2013	2013-02-07	127	29	0.02
NJ2013	2013-02-08	128	26	0
NJ2013	2013-02-09	129	30	0
NJ2013	2013-02-10	130	37	0
NJ2013	2013-02-11	131	39	0.11
NJ2013	2013-02-12	132	36	0.02
NJ2013	2013-02-13	133	41	0.01
NJ2013	2013-02-14	134	42	0
NJ2013	2013-02-15	135	40	0
NJ2013	2013-02-16	136	45	0.02
NJ2013	2013-02-17	137	46	0
NJ2013	2013-02-18	138	35	1.13
NJ2013	2013-02-19	139	32	0.03
NJ2013	2013-02-20	140	39	0
NJ2013	2013-02-21	141	44	0
NJ2013	2013-02-22	142	44	0
NJ2013	2013-02-23	143	47	0
NJ2013	2013-02-24	144	53	0
NJ2013	2013-02-25	145	58	0.25
NJ2013	2013-02-26	146	51	0.04
NJ2013	2013-02-27	147	50	0
NJ2013	2013-02-28	148	56	0.08
NJ2013	2013-03-01	149	39	0
NJ2013	2013-03-02	150	37	0
NJ2013	2013-03-03	151	46	0
NJ2013	2013-03-04	152	54	0
NJ2013	2013-03-05	153	54	0
NJ2013	2013-03-06	154	64	0
NJ2013	2013-03-07	155	63	0
NJ2013	2013-03-08	156	69	0
NJ2013	2013-03-09	157	69	0
NJ2013	2013-03-10	158	44	0
NJ2013	2013-03-11	159	47	0
NJ2013	2013-03-12	160	57	0.2
NJ2013	2013-03-13	161	40	0
NJ2013	2013-03-14	162	42	0
NJ2013	2013-03-15	163	50	0
NJ2013	2013-03-16	164	53	0.75
NJ2013	2013-03-17	165	52	0.73
NJ2013	2013-03-18	166	59	0.72
NJ2013	2013-03-19	167	58	0
NJ2013	2013-03-20	168	42	0
NJ2013	2013-03-21	169	51	0.05
NJ2013	2013-03-22	170	55	0
NJ2013	2013-03-23	171	51	0
NJ2013	2013-03-24	172	43	0
NJ2013	2013-03-25	173	46	0
NJ2013	2013-03-26	174	46	0
NJ2013	2013-03-27	175	52	0
NJ2013	2013-03-28	176	58	0
NJ2013	2013-03-29	177	50	0
NJ2013	2013-03-30	178	55	0
NJ2013	2013-03-31	179	55	0
NJ2013	2013-04-01	180	61	0
NJ2013	2013-04-02	181	54	0
NJ2013	2013-04-03	182	59	0
NJ2013	2013-04-04	183	64	0
NJ2013	2013-04-05	184	53	0.22
NJ2013	2013-04-06	185	47	0.01
NJ2013	2013-04-07	186	54	0
NJ2013	2013-04-08	187	61	0
NJ2013	2013-04-09	188	55	0
NJ2013	2013-04-10	189	56	0
NJ2013	2013-04-11	190	57	0
NJ2013	2013-04-12	191	63	0
NJ2013	2013-04-13	192	71	0
NJ2013	2013-04-14	193	65	0
NJ2013	2013-04-15	194	75	0
NJ2013	2013-04-16	195	70	0
NJ2013	2013-04-17	196	67	0
NJ2013	2013-04-18	197	56	0
NJ2013	2013-04-19	198	53	0.26
NJ2013	2013-04-20	199	46	0
NJ2013	2013-04-21	200	51	0
NJ2014	2013-09-26	1	69	0
NJ2014	2013-09-27	2	68	0.18
NJ2014	2013-09-28	3	63	0.07
NJ2014	2013-09-29	4	66	0.01
NJ2014	2013-09-30	5	69	0
NJ2014	2013-10-01	6	69	0
NJ2014	2013-10-02	7	65	0
NJ2014	2013-10-03	8	66	0
NJ2014	2013-10-04	9	67	0
NJ2014	2013-10-05	10	70	0
NJ2014	2013-10-06	11	72	0.37
NJ2014	2013-10-07	12	71	0.44
NJ2014	2013-10-08	13	67	0.1
NJ2014	2013-10-09	14	68	0.05
NJ2014	2013-10-10	15	73	0
NJ2014	2013-10-11	16	71	0
NJ2014	2013-10-12	17	71	0
NJ2014	2013-10-13	18	70	0
NJ2014	2013-10-14	19	71	0
NJ2014	2013-10-15	20	54	0
NJ2014	2013-10-16	21	58	0
NJ2014	2013-10-17	22	62	0
NJ2014	2013-10-18	23	66	0
NJ2014	2013-10-19	24	62	0
NJ2014	2013-10-20	25	62	0
NJ2014	2013-10-21	26	60	0
NJ2014	2013-10-22	27	59	0
NJ2014	2013-10-23	28	61	0
NJ2014	2013-10-24	29	58	0
NJ2014	2013-10-25	30	53	0
NJ2014	2013-10-26	31	53	0
NJ2014	2013-10-27	32	58	0
NJ2014	2013-10-28	33	62	0
NJ2014	2013-10-29	34	66	0
NJ2014	2013-10-30	35	63	0.02
NJ2014	2013-10-31	36	61	0.02
NJ2014	2013-11-01	37	62	0.01
NJ2014	2013-11-02	38	63	0
NJ2014	2013-11-03	39	56	0
NJ2014	2013-11-04	40	56	0
NJ2014	2013-11-05	41	57	0
NJ2014	2013-11-06	42	57	0
NJ2014	2013-11-07	43	62	0
NJ2014	2013-11-08	44	65	0
NJ2014	2013-11-09	45	67	0.48
NJ2014	2013-11-10	46	56	0
NJ2014	2013-11-11	47	53	0
NJ2014	2013-11-12	48	53	0
NJ2014	2013-11-13	49	57	0
NJ2014	2013-11-14	50	50	0
NJ2014	2013-11-15	51	50	0
NJ2014	2013-11-16	52	54	0
NJ2014	2013-11-17	53	46	0
NJ2014	2013-11-18	54	44	0
NJ2014	2013-11-19	55	46	0
NJ2014	2013-11-20	56	53	0
NJ2014	2013-11-21	57	53	0
NJ2014	2013-11-22	58	54	0
NJ2014	2013-11-23	59	59	0.03
NJ2014	2013-11-24	60	47	0.22
NJ2014	2013-11-25	61	45	0.22
NJ2014	2013-11-26	62	51	0
NJ2014	2013-11-27	63	39	0
NJ2014	2013-11-28	64	38	0
NJ2014	2013-11-29	65	39	0
NJ2014	2013-11-30	66	45	0
NJ2014	2013-12-01	67	40	0
NJ2014	2013-12-02	68	45	0
NJ2014	2013-12-03	69	49	0
NJ2014	2013-12-04	70	47	0
NJ2014	2013-12-05	71	49	0
NJ2014	2013-12-06	72	43	0
NJ2014	2013-12-07	73	40	0
NJ2014	2013-12-08	74	43	0
NJ2014	2013-12-09	75	39	0.01
NJ2014	2013-12-10	76	39	0
NJ2014	2013-12-11	77	37	0
NJ2014	2013-12-12	78	42	0
NJ2014	2013-12-13	79	41	0
NJ2014	2013-12-14	80	46	0
NJ2014	2013-12-15	81	47	0
NJ2014	2013-12-16	82	41	0.29
NJ2014	2013-12-17	83	40	0.11
NJ2014	2013-12-18	84	39	0.1
NJ2014	2013-12-19	85	33	0
NJ2014	2013-12-20	86	31	0
NJ2014	2013-12-21	87	30	0
NJ2014	2013-12-22	88	32	0
NJ2014	2013-12-23	89	35	0
NJ2014	2013-12-24	90	35	0
NJ2014	2013-12-25	91	38	0
NJ2014	2013-12-26	92	33	0
NJ2014	2013-12-27	93	27	0
NJ2014	2013-12-28	94	31	0
NJ2014	2013-12-29	95	32	0
NJ2014	2013-12-30	96	41	0
NJ2014	2013-12-31	97	45	0
NJ2014	2014-01-01	98	43	0
NJ2014	2014-01-02	99	51	0
NJ2014	2014-01-03	100	48	0
NJ2014	2014-01-04	101	39	0
NJ2014	2014-01-05	102	41	0
NJ2014	2014-01-06	103	48	0
NJ2014	2014-01-07	104	46	0.31
NJ2014	2014-01-08	105	38	0.07
NJ2014	2014-01-09	106	35	0.06
NJ2014	2014-01-10	107	40	0
NJ2014	2014-01-11	108	40	0.03
NJ2014	2014-01-12	109	40	0
NJ2014	2014-01-13	110	35	0
NJ2014	2014-01-14	111	35	0
NJ2014	2014-01-15	112	37	0
NJ2014	2014-01-16	113	42	0
NJ2014	2014-01-17	114	44	0
NJ2014	2014-01-18	115	34	0
NJ2014	2014-01-19	116	41	0
NJ2014	2014-01-20	117	36	0
NJ2014	2014-01-21	118	32	0
NJ2014	2014-01-22	119	35	0
NJ2014	2014-01-23	120	42	0
NJ2014	2014-01-24	121	52	0
NJ2014	2014-01-25	122	45	0
NJ2014	2014-01-26	123	41	0
NJ2014	2014-01-27	124	44	0
NJ2014	2014-01-28	125	46	0.04
NJ2014	2014-01-29	126	44	0.35
NJ2014	2014-01-30	127	51	0.12
NJ2014	2014-01-31	128	53	0
NJ2014	2014-02-01	129	57	0
NJ2014	2014-02-02	130	54	0
NJ2014	2014-02-03	131	39	0.01
NJ2014	2014-02-04	132	38	0
NJ2014	2014-02-05	133	38	0.11
NJ2014	2014-02-06	134	38	0.75
NJ2014	2014-02-07	135	33	0.97
NJ2014	2014-02-08	136	33	0
NJ2014	2014-02-09	137	30	0
NJ2014	2014-02-10	138	27	0
NJ2014	2014-02-11	139	30	0
NJ2014	2014-02-12	140	35	0.02
NJ2014	2014-02-13	141	36	0.14
NJ2014	2014-02-14	142	35	0
NJ2014	2014-02-15	143	43	0
NJ2014	2014-02-16	144	42	0.33
NJ2014	2014-02-17	145	39	0.39
NJ2014	2014-02-18	146	33	0.73
NJ2014	2014-02-19	147	34	0.19
NJ2014	2014-02-20	148	38	0
NJ2014	2014-02-21	149	43	0
NJ2014	2014-02-22	150	46	0
NJ2014	2014-02-23	151	49	0
NJ2014	2014-02-24	152	49	0.32
NJ2014	2014-02-25	153	50	0.14
NJ2014	2014-02-26	154	50	0
NJ2014	2014-02-27	155	50	0.7
NJ2014	2014-02-28	156	44	0.46
NJ2014	2014-03-01	157	40	0.04
NJ2014	2014-03-02	158	45	0.02
NJ2014	2014-03-03	159	50	0.05
NJ2014	2014-03-04	160	47	0
NJ2014	2014-03-05	161	46	0
NJ2014	2014-03-06	162	41	0
NJ2014	2014-03-07	163	47	0
NJ2014	2014-03-08	164	41	0
NJ2014	2014-03-09	165	46	0
NJ2014	2014-03-10	166	51	0
NJ2014	2014-03-11	167	58	0.48
NJ2014	2014-03-12	168	49	0.13
NJ2014	2014-03-13	169	44	0.05
NJ2014	2014-03-14	170	51	0
NJ2014	2014-03-15	171	56	0
NJ2014	2014-03-16	172	64	0
NJ2014	2014-03-17	173	64	0
NJ2014	2014-03-18	174	61	0.61
NJ2014	2014-03-19	175	48	0.3
NJ2014	2014-03-20	176	48	0.28
NJ2014	2014-03-21	177	49	0
NJ2014	2014-03-22	178	55	0
NJ2014	2014-03-23	179	60	0
NJ2014	2014-03-24	180	61	0.09
NJ2014	2014-03-25	181	63	0.24
NJ2014	2014-03-26	182	62	0.08
NJ2014	2014-03-27	183	65	0
NJ2014	2014-03-28	184	66	0.24
NJ2014	2014-03-29	185	60	0.19
NJ2014	2014-03-30	186	60	0.18
NJ2014	2014-03-31	187	56	0
NJ2014	2014-04-01	188	57	0
NJ2014	2014-04-02	189	62	0
NJ2014	2014-04-03	190	59	0
NJ2014	2014-04-04	191	58	0
NJ2014	2014-04-05	192	54	0
NJ2014	2014-04-06	193	58	0
NJ2014	2014-04-07	194	63	0.02
NJ2014	2014-04-08	195	63	0.01
NJ2014	2014-04-09	196	67	0
NJ2014	2014-04-10	197	71	0
NJ2014	2014-04-11	198	61	1.3
NJ2014	2014-04-12	199	58	0.01
NJ2014	2014-04-13	200	57	0
CQ2013	2012-09-26	1	69	0.28
CQ2013	2012-09-27	2	70	0.83
CQ2013	2012-09-28	3	72	0.98
CQ2013	2012-09-29	4	71	0.11
CQ2013	2012-09-30	5	68	1.94
CQ2013	2012-10-01	6	72	0
CQ2013	2012-10-02	7	67	0.75
CQ2013	2012-10-03	8	64	0.41
CQ2013	2012-10-04	9	63	0.63
CQ2013	2012-10-05	10	65	0.34
CQ2013	2012-10-06	11	65	0
CQ2013	2012-10-07	12	62	0.19
CQ2013	2012-10-08	13	62	0.1
CQ2013	2012-10-09	14	66	0.06
CQ2013	2012-10-10	15	65	0.1
CQ2013	2012-10-11	16	64	0.12
CQ2013	2012-10-12	17	61	0.24
CQ2013	2012-10-13	18	62	0.08
CQ2013	2012-10-14	19	65	0
CQ2013	2012-10-15	20	65	0.05
CQ2013	2012-10-16	21	69	0
CQ2013	2012-10-17	22	67	0
CQ2013	2012-10-18	23	68	0
CQ2013	2012-10-19	24	68	0
CQ2013	2012-10-20	25	66	0
CQ2013	2012-10-21	26	68	0
CQ2013	2012-10-22	27	66	0
CQ2013	2012-10-23	28	63	0.01
CQ2013	2012-10-24	29	59	0.05
CQ2013	2012-10-25	30	62	0
CQ2013	2012-10-26	31	65	0
CQ2013	2012-10-27	32	65	0
CQ2013	2012-10-28	33	68	0
CQ2013	2012-10-29	34	67	0
CQ2013	2012-10-30	35	65	0.02
CQ2013	2012-10-31	36	63	0
CQ2013	2012-11-01	37	66	0
CQ2013	2012-11-02	38	67	0
CQ2013	2012-11-03	39	63	0.05
CQ2013	2012-11-04	40	57	0.03
CQ2013	2012-11-05	41	52	0.6
CQ2013	2012-11-06	42	55	0.02
CQ2013	2012-11-07	43	55	0.07
CQ2013	2012-11-08	44	57	0.01
CQ2013	2012-11-09	45	59	0
CQ2013	2012-11-10	46	59	0
CQ2013	2012-11-11	47	59	0
CQ2013	2012-11-12	48	56	0
CQ2013	2012-11-13	49	56	0
CQ2013	2012-11-14	50	58	0
CQ2013	2012-11-15	51	57	0.06
CQ2013	2012-11-16	52	57	0.13
CQ2013	2012-11-17	53	55	0
CQ2013	2012-11-18	54	56	0
CQ2013	2012-11-19	55	61	0
CQ2013	2012-11-20	56	59	0
CQ2013	2012-11-21	57	60	0
CQ2013	2012-11-22	58	59	0
CQ2013	2012-11-23	59	51	0.12
CQ2013	2012-11-24	60	50	0.06
CQ2013	2012-11-25	61	50	0.02
CQ2013	2012-11-26	62	48	0.07
CQ2013	2012-11-27	63	48	0
CQ2013	2012-11-28	64	51	0
CQ2013	2012-11-29	65	49	0
CQ2013	2012-11-30	66	50	0
CQ2013	2012-12-01	67	51	0
CQ2013	2012-12-02	68	53	0
CQ2013	2012-12-03	69	52	0
CQ2013	2012-12-04	70	52	0
CQ2013	2012-12-05	71	50	0
CQ2013	2012-12-06	72	51	0
CQ2013	2012-12-07	73	50	0
CQ2013	2012-12-08	74	52	0
CQ2013	2012-12-09	75	51	0.02
CQ2013	2012-12-10	76	51	0.1
CQ2013	2012-12-11	77	51	0
CQ2013	2012-12-12	78	51	0.01
CQ2013	2012-12-13	79	52	0
CQ2013	2012-12-14	80	53	0
CQ2013	2012-12-15	81	50	0
CQ2013	2012-12-16	82	54	0
CQ2013	2012-12-17	83	54	0
CQ2013	2012-12-18	84	48	0.21
CQ2013	2012-12-19	85	46	0
CQ2013	2012-12-20	86	46	0
CQ2013	2012-12-21	87	47	0.04
CQ2013	2012-12-22	88	48	0
CQ2013	2012-12-23	89	47	0
CQ2013	2012-12-24	90	45	0
CQ2013	2012-12-25	91	46	0.02
CQ2013	2012-12-26	92	45	0.03
CQ2013	2012-12-27	93	45	0.02
CQ2013	2012-12-28	94	46	0
CQ2013	2012-12-29	95	44	0
CQ2013	2012-12-30	96	42	0
CQ2013	2012-12-31	97	41	0
CQ2013	2013-01-01	98	44	0
CQ2013	2013-01-02	99	42	0.07
CQ2013	2013-01-03	100	38	0.19
CQ2013	2013-01-04	101	37	0.02
CQ2013	2013-01-05	102	39	0
CQ2013	2013-01-06	103	38	0.01
CQ2013	2013-01-07	104	40	0
CQ2013	2013-01-08	105	42	0
CQ2013	2013-01-09	106	42	0
CQ2013	2013-01-10	107	43	0
CQ2013	2013-01-11	108	44	0
CQ2013	2013-01-12	109	45	0
CQ2013	2013-01-13	110	47	0
CQ2013	2013-01-14	111	46	0.02
CQ2013	2013-01-15	112	45	0
CQ2013	2013-01-16	113	45	0.06
CQ2013	2013-01-17	114	47	0
CQ2013	2013-01-18	115	51	0
CQ2013	2013-01-19	116	49	0
CQ2013	2013-01-20	117	49	0
CQ2013	2013-01-21	118	48	0
CQ2013	2013-01-22	119	47	0
CQ2013	2013-01-23	120	46	0
CQ2013	2013-01-24	121	49	0
CQ2013	2013-01-25	122	49	0
CQ2013	2013-01-26	123	51	0
CQ2013	2013-01-27	124	55	0
CQ2013	2013-01-28	125	51	0
CQ2013	2013-01-29	126	51	0
CQ2013	2013-01-30	127	53	0
CQ2013	2013-01-31	128	51	0
CQ2013	2013-02-01	129	56	0
CQ2013	2013-02-02	130	56	0
CQ2013	2013-02-03	131	55	0
CQ2013	2013-02-04	132	58	0
CQ2013	2013-02-05	133	62	0
CQ2013	2013-02-06	134	60	0
CQ2013	2013-02-07	135	51	0.29
CQ2013	2013-02-08	136	42	0.52
CQ2013	2013-02-09	137	43	0.01
CQ2013	2013-02-10	138	49	0
CQ2013	2013-02-11	139	48	0.02
CQ2013	2013-02-12	140	46	0
CQ2013	2013-02-13	141	49	0
CQ2013	2013-02-14	142	49	0
CQ2013	2013-02-15	143	50	0
CQ2013	2013-02-16	144	56	0
CQ2013	2013-02-17	145	58	0
CQ2013	2013-02-18	146	50	0.2
CQ2013	2013-02-19	147	46	0.09
CQ2013	2013-02-20	148	48	0
CQ2013	2013-02-21	149	49	0.02
CQ2013	2013-02-22	150	51	0
CQ2013	2013-02-23	151	57	0
CQ2013	2013-02-24	152	56	0
CQ2013	2013-02-25	153	55	0
CQ2013	2013-02-26	154	58	0
CQ2013	2013-02-27	155	61	0
CQ2013	2013-02-28	156	60	0
CQ2013	2013-03-01	157	55	0
CQ2013	2013-03-02	158	49	0.09
CQ2013	2013-03-03	159	52	0.02
CQ2013	2013-03-04	160	53	0
CQ2013	2013-03-05	161	60	0
CQ2013	2013-03-06	162	62	0
CQ2013	2013-03-07	163	65	0
CQ2013	2013-03-08	164	69	0
CQ2013	2013-03-09	165	71	0
CQ2013	2013-03-10	166	70	0
CQ2013	2013-03-11	167	68	0
CQ2013	2013-03-12	168	59	0
CQ2013	2013-03-13	169	65	0
CQ2013	2013-03-14	170	65	0
CQ2013	2013-03-15	171	67	0
CQ2013	2013-03-16	172	65	0
CQ2013	2013-03-17	173	65	0.04
CQ2013	2013-03-18	174	64	0
CQ2013	2013-03-19	175	60	0
CQ2013	2013-03-20	176	67	0
CQ2013	2013-03-21	177	72	0
CQ2013	2013-03-22	178	65	0
CQ2013	2013-03-23	179	63	0
CQ2013	2013-03-24	180	68	0
CQ2013	2013-03-25	181	60	0
CQ2013	2013-03-26	182	65	0
CQ2013	2013-03-27	183	64	0
CQ2013	2013-03-28	184	65	0
CQ2013	2013-03-29	185	68	0
CQ2013	2013-03-30	186	69	0
CQ2013	2013-03-31	187	67	0
CQ2013	2013-04-01	188	68	0
CQ2013	2013-04-02	189	66	0.01
CQ2013	2013-04-03	190	69	0
CQ2013	2013-04-04	191	63	0.14
CQ2013	2013-04-05	192	51	0.79
CQ2013	2013-04-06	193	58	0.43
CQ2013	2013-04-07	194	59	0
CQ2013	2013-04-08	195	67	0
CQ2013	2013-04-09	196	56	0.12
CQ2013	2013-04-10	197	59	0.04
CQ2013	2013-04-11	198	60	0
CQ2013	2013-04-12	199	59	0
CQ2013	2013-04-13	200	64	0
a, TAVG: daily average temperature (°F); b, PRCP: precipitation (inches)

## Sheet: Table S4
Table S4. The intercept and slope of reaction-norm parametersfor flowering time-related climatic index for each individual
Sample ID	TAVG135-144		TAVG10-19		PRCP3-41		PRCP133-169
	Slope	Intercept	Slope	Intercept	Slope	Intercept	Slope	Intercept
X2	-1.36772	213.748	2.27288	4.78823	-65.0694	161.914	113.323	142.826
X6	-1.39617	212.363	2.2815	1.64067	-97.7631	161.956	137.389	137.305
X14	-1.23521	208.937	1.7553	40.0993	-86.7123	164.358	104.889	144.574
X24	-1.29436	211.689	1.91993	29.3808	-86.0099	164.588	109.399	144.307
X28	-1.42162	217.139	2.09727	17.6698	-82.4277	164.444	115.968	143.644
X32	-1.35724	212.883	2.04857	19.3535	-83.6163	162.968	118.555	141.756
X36	-1.63498	225.607	2.31943	2.3914	-100.708	165.477	134.475	140.948
X42	-1.32056	211.639	1.96884	24.9684	-66.2921	161.869	102.73	143.981
X44	-1.59305	222.002	2.34141	-0.934882	-100.088	163.57	138.965	138.54
X46	-1.41638	216.92	1.98263	25.3323	-92.6749	165.263	120.785	143.054
X50	-1.14388	205.129	1.71307	42.9223	-75.5084	163.463	106.428	144.385
X56	-1.22548	212.245	1.59369	54.616	-85.7221	167.993	102.223	148.615
X60	-1.26216	211.347	1.71328	44.1936	-88.1946	165.762	106.345	145.681
X64	-1.00165	199.197	1.5019	57.0375	-73.264	163.283	99.5673	145.226
X74	-1.33628	213.723	1.86886	33.0801	-81.8121	164.538	117.574	143.59
X76	-1.73978	229.692	2.46401	-7.55893	-95.8268	164.801	137.554	140.285
X82	-1.42911	221.165	1.8346	38.9417	-100.833	169.629	125.032	146.248
X86	-1.1364	203.531	1.67816	43.9699	-81.7162	162.673	108.896	142.797
X90	-1.34451	215.066	1.85076	35.29	-83.3804	165.663	107.448	145.831
X96	-1.00464	201.179	1.36227	68.228	-75.0157	165.281	87.6998	148.537
X100	-1.33478	211.089	2.18971	9.06219	-84.3621	162.17	123.973	140.235
X102	-1.31831	211.974	1.91411	29.0554	-92.0179	164.354	120.3	142.256
X108	-1.62524	225.773	2.08003	18.9649	-107.361	166.58	130.902	141.957
X110	-1.00539	200.068	1.58464	52.221	-63.4248	163.211	87.7325	147.391
X114	-1.06603	202.596	1.56051	53.8341	-68.1805	163.591	88.179	147.336
X116	-1.16859	209.159	1.60597	53.0807	-72.6017	166.23	91.2794	149.242
X118	-1.02186	202.469	1.31141	72.1986	-73.3901	165.722	87.8626	149.089
X122	-1.28837	213.011	1.67751	47.156	-92.9345	166.713	105.967	146.299
X130	-1.35724	211.168	2.18152	8.75237	-75.8494	160.633	130.654	138.559
X132	-1.10271	207.126	1.40515	67.2189	-74.3067	167.081	86.6694	150.521
X134	-1.18057	208.23	1.5883	52.8332	-81.0532	165.477	102.033	146.495
X136	-1.08325	204.171	1.4978	58.8826	-71.8776	164.744	93.0634	147.594
X138	-1.53541	222.598	2.11063	17.4911	-95.2446	166.183	122.072	143.611
X144	-0.968708	197.824	1.50642	56.7351	-67.5793	162.829	95.4439	145.731
X146	-1.12517	207.062	1.48961	60.5728	-79.1866	166.471	94.8104	148.523
X148	-1.48301	223.127	1.90678	33.8309	-91.6927	168.613	108.258	148.018
X154	-1.12367	208.571	1.28038	76.1298	-77.2207	167.885	85.7455	151.206
X156	-0.92454	196.125	1.57365	52.3841	-52.9174	161.8	85.4317	147.101
X160	-1.14388	204.414	1.87317	31.5064	-57.4254	161.303	102.221	144.186
X168	-1.36173	216.356	1.79991	39.2606	-81.7549	166.105	107.611	146.383
X170	-1.17083	206.967	1.66911	46.5749	-78.4185	164.41	103.803	145.421
X176	-1.25618	215.811	1.40536	69.4902	-87.9725	170.459	84.7067	153.047
X178	-1.14688	208.396	1.43941	64.3574	-84.119	167.294	95.0235	148.926
X180	-1.20602	211.291	1.41786	66.2263	-85.8457	167.86	93.7271	149.513
X182	-1.07052	203.355	1.52021	57.099	-64.9268	163.903	91.4196	147.51
X184	-1.09747	206.193	1.50039	60.1384	-71.4795	166.141	87.8492	149.662
X188	-1.23297	212.272	1.50297	60.3941	-83.8443	167.558	95.0403	149.209
X196	-1.47178	218.23	1.96604	25.4414	-106.142	165.339	130.306	140.887
X198	-1.486	218.252	2.11343	15.0181	-76.0919	162.367	132.91	139.997
X200	-1.66866	223.869	2.61119	-20.2535	-99.4195	162.231	151.659	135.699
X204	-1.27414	211.132	1.87489	32.6768	-84.1531	164.725	116.347	143.741
X208	-1.59081	224.622	2.17678	12.7835	-99.1205	166.207	128.099	142.586
X218	-1.37745	216.011	1.87381	33.3203	-89.0034	165.684	117.167	144.212
X220	-1.39467	219.158	1.71953	46.0616	-93.6552	168.484	114.908	146.917
X222	-1.31681	212.625	1.83244	35.2286	-87.4173	164.7	112.712	143.901
X224	-0.842192	195.834	1.11597	86.1196	-67.0195	166.07	78.9849	151.034
X226	-1.30484	214.983	1.67773	48.4273	-88.0835	167.611	102.389	148.023
X228	-1.26142	211.458	1.58744	52.748	-83.4442	165.526	102.177	146.335
X232	-1.23896	211.807	1.61632	52.1037	-81.8311	166.682	94.5343	148.557
X234	-1.25468	210.749	1.65273	47.9552	-93.0363	165.864	107.297	145.279
X236	-1.36697	215.717	1.84753	35.2203	-86.3595	165.616	116.606	144.423
X238	-1.64022	226.683	2.13455	15.6066	-103.062	166.522	130.232	142.325
X242	-1.29585	211.608	1.76069	39.882	-89.9784	164.762	115.012	143.476
X244	-1.2457	208.803	1.65833	46.0093	-76.5452	162.974	106.876	143.759
X248	-1.37595	215.377	1.6064	50.6234	-87.6808	165.007	105.392	145.083
X250	-1.2457	208.088	1.91799	27.939	-68.4794	161.615	103.809	143.42
X254	-1.24195	215.361	1.47862	64.736	-79.0321	169.887	94.0661	152.043
X256	-1.46055	219.048	1.91346	30.2415	-95.3254	165.761	119.838	143.456
X260	-1.17158	209.569	1.38748	67.9714	-81.0887	167.194	91.0671	149.553
X262	-1.04881	201.164	1.40536	63.4902	-80.0249	163.824	99.814	145.196
X266	-1.38793	216.734	1.87252	33.6924	-91.7091	166.186	112.133	145.114
X268	-1.31082	215.804	1.60877	53.6078	-85.6439	167.987	104.238	148.368
X270	-1.32879	214.268	1.69604	45.4887	-97.7342	166.667	112.344	145.089
X272	-1.58632	226.721	1.89192	34.1104	-100.17	168.576	117.038	146.228
X276	-1.11619	204.831	1.50707	57.549	-84.251	165.019	103.424	145.61
X278	-1.50397	220.144	2.00418	23.4634	-87.3746	164.411	114.792	143.36
X280	-1.4598	216.588	2.12657	13.5681	-86.0283	162.589	122.85	140.658
X282	-1.26441	209.726	1.97444	25.0225	-72.8205	162.819	113.075	143.142
X284	-1.25543	208.78	1.90765	28.9161	-79.4362	162.777	108.525	143.128
X286	-1.01063	200.858	1.16424	80.8932	-77.4874	164.907	85.6105	148.222
X290	-1.14688	209.396	1.51483	60.3162	-90.4936	168.803	97.1087	149.67
X296	-1.61327	225.702	2.14597	14.9861	-102.161	166.593	131.661	142.293
X300	-1.4059	214.626	2.10416	15.3517	-89.8608	163.181	125.997	140.558
X302	-1.32879	213.125	1.9335	28.4734	-84.5979	164.475	114.304	143.706
X304	-1.20228	210.135	1.51741	58.5719	-82.6722	166.607	96.3292	148.194
X308	-1.22399	210.754	1.67708	47.6134	-74.5301	165.67	92.9056	148.328
X314	-1.18206	207.578	1.81628	36.8803	-60.8821	163.151	99.1771	146.131
X316	-1.44483	219.106	1.84839	35.3056	-96.7131	166.586	120.92	144.038
X320	-1.04507	201.294	1.52172	55.9981	-69.5813	163.275	93.2933	146.281
X322	-1.40216	214.327	2.12291	13.9558	-81.4113	162.363	129.296	140.011
X324	-1.22473	205.929	1.96152	23.7439	-72.8796	160.681	110.688	141.292
X328	-1.41039	217.385	2.03973	22.2297	-86.9981	165.524	116.78	144.259
X330	-1.30109	213.256	1.62601	50.3127	-98.1901	166.847	112.958	145.156
X336	-1.31382	210.643	1.8514	32.1039	-98.3643	163.718	129.66	139.966
X338	-1.25168	209.91	1.70574	43.6977	-90.2919	164.93	107.619	144.525
X340	-1.37745	219.154	1.76155	43.9673	-100.084	169.712	110.985	148.112
X342	-1.10046	205.604	1.40407	65.8624	-88.7465	166.806	106.092	146.712
X344	-1.17009	207.078	1.59304	51.8021	-78.6767	164.573	100.205	146.005
X348	-1.05031	200.655	1.66588	45.5052	-71.2837	162.554	105.032	143.985
X350	-1.34601	213.129	1.91713	28.8538	-92.9746	164.43	126.62	141.482
X352	-1.50921	218.077	2.05374	17.865	-90.5514	162.379	127.868	139.472
X354	-1.16335	206.226	1.62731	48.9405	-74.5623	163.673	99.7133	145.494
X356	-1.08175	204.823	1.392	66.6689	-77.0735	165.874	93.2992	148.28
X358	-1.09448	205.782	1.32671	71.4617	-75.6405	166.188	94.0527	148.616
X360	-1.22997	211.433	1.60123	53.1119	-75.4657	166.174	95.0747	148.491
X364	-0.870639	198.449	1.17587	83.544	-55.8452	166.606	57.847	155.053
X368	-1.38419	213.435	2.06322	17.8026	-86.732	162.645	120.26	140.976
X370	-0.869142	194.529	1.60209	51.1971	-34.128	161.013	71.1888	149.561
X372	-1.02485	202.879	1.41118	65.8156	-74.017	166.058	88.9132	149.246
X378	-1.15436	205.851	1.83395	35.1278	-63.2389	162.768	98.7735	145.609
X380	-0.900584	196.84	1.35774	68.5305	-65.3066	164.505	82.8892	149.127
X384	-1.05031	199.226	1.76737	37.2927	-52.9949	159.664	96.4953	143.602
X386	-1.5429	221.767	2.00116	23.6651	-98.9418	165.335	127.25	141.833
X390	-1.53616	224.201	1.97531	28.1078	-96.8984	167.886	119.968	145.44
X392	-1.23746	209.316	1.57602	52.3685	-94.1737	165.24	112.976	143.868
X394	-1.29585	211.894	1.94492	27.8529	-75.538	163.894	109.86	144.393
X396	-1.23671	212.571	1.70294	47.1707	-74.4164	166.947	91.8651	149.741
X398	-1.20078	207.644	1.50125	57.2236	-74.902	163.557	92.7504	146.204
X400	-1.26741	208.422	1.64756	45.4438	-89.5323	162.726	114.841	141.497
X402	-0.955981	195.579	1.45837	58.2327	-52.3064	159.894	87.3138	145.013
X404	-1.39991	215.091	2.16127	12.2491	-84.184	163.442	121.992	141.763
X406	-1.13789	204.45	1.69238	43.8764	-77.475	163.191	101.516	144.559
X408	-1.1918	208.412	1.71479	44.0928	-73.6424	164.599	98.3682	146.659
X410	-1.03533	205.459	1.2069	81.6128	-72.9828	168.118	80.3165	152.442
X414	-1.15736	210.833	1.40019	68.9788	-76.4933	168.684	84.6975	152.191
X416	-1.02935	203.352	1.58033	54.7947	-70.2791	166.045	93.7758	148.936
X432	-1.47777	223.766	1.95721	31.3176	-92.2255	169.513	118.664	147.6
X434	-1.25842	211.048	1.75767	41.0837	-94.5501	166.127	118.037	144.105
X438	-1.10496	205.648	1.45449	62.3491	-73.4348	165.44	92.956	148.179
X444	-1.29361	214.943	1.55663	56.9505	-94.3957	168.544	103.272	148.343
X446	-0.945501	198.142	1.40256	64.9632	-64.591	163.876	83.9541	148.425
X450	-1.49424	224.024	1.89881	34.7924	-100.608	169.754	117.634	147.297
X454	-1.19554	210.854	1.48121	61.9917	-83.6748	167.687	96.2293	149.206
X462	-1.30034	215.082	1.88006	35.1883	-85.2655	167.671	105.901	147.878
X464	-1.36622	216.257	1.91583	31.2259	-76.7128	165.416	105.362	146.373
X468	-1.13939	206.37	1.60403	51.6389	-63.7362	163.951	101.478	146.42
X478	-1.24195	213.075	1.53874	58.4317	-80.0841	167.686	93.5383	149.822
X480	-1.26142	213.172	1.57365	55.3841	-90.1946	167.779	102.818	147.97
X482	-1.15362	205.249	1.74754	40.3321	-79.9822	163.535	109.236	143.755
X486	-1.15811	208.865	1.70186	46.8141	-54.9825	164.965	88.0984	149.774
X488	-0.844438	195.356	1.40816	66.0173	-41.5966	163.467	70.2523	151.533
X500	-1.04432	204.262	1.48552	61.4179	-51.8648	164.859	85.3109	150.259
X506	-1.17682	208.359	1.50556	58.6498	-77.4533	165.475	106.989	146.173
X526	-1.58257	225.136	1.99491	25.7971	-106.732	167.672	133.06	142.835
X536	-1.48076	223.319	1.8708	36.5219	-108.721	170.26	120.786	146.768
X538	-1.24719	212.294	1.50556	59.6498	-93.7623	167.779	104.023	147.537
X544	-1.24944	213.102	1.54305	57.8579	-87.8969	168.024	100.834	148.642
X548	-1.28537	211.743	1.80335	37.6016	-84.4941	164.895	111.598	144.466
X550	-1.28088	208.27	2.12291	12.9558	-68.6483	160.343	116.891	140.531
X554	-1.48001	221.431	1.93803	30.171	-98.1658	167.559	122.104	144.75
X618	-1.50696	219.555	2.07981	17.6936	-94.675	164.28	130.985	140.661
X622	-1.67091	224.82	2.60731	-19.1371	-83.8042	161.84	143.956	137.5
X624	-1.91645	241.059	2.44591	-2.34906	-124.333	171.079	157.019	141.899
X628	-1.8895	235.935	2.81697	-31.1515	-108.76	165.834	164.667	136.962
X634	-1.92319	239.34	2.60429	-14.9355	-121.794	168.876	161.377	139.365
X648	-1.28387	213.395	1.57387	54.6554	-93.5028	167.329	105.114	146.975
X654	-1.31681	214.768	1.74129	43.464	-89.2209	166.987	107.187	146.721
X658	-1.49498	219.912	2.02163	22.4396	-92.4391	164.959	123.405	142.447
X676	-1.50996	222.679	1.92144	31.28	-91.6854	167.041	117.282	145.341
X678	-1.51071	220.282	2.17829	11.6827	-90.0967	164.486	129.468	141.418
X680	-1.41713	220.523	1.8986	34.5211	-97.0607	169.185	121.711	146.512
X686	-1.26366	212.409	1.60921	52.1504	-82.634	166.318	102.867	147.107
X692	-1.352	213.093	2.12506	14.6689	-76.0479	162.792	117.898	142.265
X694	-1.64695	226.107	2.66333	-20.5963	-70.2147	163.04	128.366	141.696
X696	-1.27863	213.605	1.72578	44.9296	-78.8699	166.589	99.6646	148.071
X698	-1.39841	218.742	1.85938	36.1425	-86.2984	167.325	104.942	147.567
X700	-1.40066	215.836	1.83977	34.4532	-101.706	165.556	120.959	142.604
X708	-1.62599	225.09	2.20091	10.1704	-100.62	165.327	132.593	141.036
X714	-1.46654	220.44	1.97013	27.5963	-91.6789	166.612	119.083	144.691
X716	-1.29436	209.403	1.90463	28.1178	-87.8805	162.451	128.302	139.704
X718	-1.44932	217.865	1.95742	26.589	-81.6071	163.95	112.114	143.688
X720	-1.57658	223.601	2.05202	20.6945	-101.055	165.933	129.055	142.041
X724	-1.49349	220.85	1.97789	26.3635	-98.1698	166.417	121.109	143.729
X738	-1.52119	221.433	2.0755	19.2674	-97.652	165.804	126.091	142.547
X740	-1.63647	225.669	2.24099	7.6342	-96.5134	165.141	132.513	141.188
X742	-1.61102	226.322	2.30111	5.32996	-91.0573	166.42	124.52	143.882
X744	-1.489	221.52	1.9891	26.4717	-99.7283	167.398	123.215	144.328
X746	-1.3535	214.298	1.93135	28.7603	-96.8925	165.6	125.114	142.524
X748	-1.76149	233.026	2.58576	-13.2682	-90.7925	166.827	135.717	142.938
X750	-1.49498	220.341	2.06645	19.8723	-99.3952	165.943	128.376	142.267
X762	-1.4568	219.892	2.01301	24.5872	-92.1519	166.507	122.44	144.137
X784	-1.48974	221.837	2.23216	10.5105	-91.4509	167.023	129.164	143.884
X794	-1.63123	225.165	2.11257	15.9329	-113.511	166.214	137.971	140.234
X796	-1.30409	214.809	1.78245	41.2844	-97.3274	168.206	121.576	145.529
X798	-1.01512	201.759	1.50039	59.1384	-56.3248	163.93	72.5422	150.538
X800	-1.4059	217.055	2.05094	21.3379	-75.1175	164.432	112.008	144.701
X804	-1.38344	220.832	1.66006	52.1798	-99.6534	171.107	111.639	149.461
X814	-0.955233	201.547	1.13105	86.1113	-59.0121	166.43	75.5194	152.459
X822	-1.15362	209.249	1.43079	65.5049	-76.1602	167.229	90.1525	150.094
X826	-1.57359	224.619	2.41338	-2.31701	-80.906	165.466	132.564	142.753
X828	-1.47777	220.48	2.06559	20.7871	-97.4398	166.644	123.563	143.714
X848	-1.40515	218.023	1.9182	31.2104	-87.1814	166.396	115.039	145.33
X854	-1.52044	224.831	1.94083	31.698	-97.7046	169.237	118.164	146.947
X858	-1.43135	221.545	1.92682	33.0628	-98.0285	169.691	118.012	147.394
X860	-1.38419	216.864	1.69173	46.0625	-93.288	166.598	111.885	145.431
X862	-1.28687	214.091	1.64067	50.7618	-78.7279	166.72	103.79	147.708
X864	-1.18506	209.703	1.6579	49.4667	-71.3316	165.986	92.3518	148.967
X868	-1.4875	223.029	1.82512	39.004	-92.1283	168.362	113.862	147.045
X872	-1.23147	208.495	1.86369	32.5687	-78.7358	163.435	111.251	143.508
X878	-1.25842	213.048	1.7094	46.31	-77.8593	166.794	99.6461	148.359
X880	-1.55338	224.49	1.99987	26.0372	-101.647	167.837	122.216	144.736
X884	-1.14763	206.999	1.67363	47.2724	-67.2054	164.514	90.3346	148.072
X896	-1.489	220.948	2.20587	11.4105	-83.2786	165.512	119.258	144.241
X898	-1.39692	213.966	2.17182	10.5434	-87.3437	162.694	129.922	139.791
X902	-1.02935	205.067	1.34632	72.151	-70.3053	167.761	78.0761	152.574
X904	-1.41937	217.759	2.05633	21.1207	-101.403	166.675	132.897	142.284
X908	-1.34077	214.196	1.76801	40.1066	-93.2196	165.735	119.283	143.667
X910	-1.02036	204.121	1.25388	77.7586	-72.4322	167.36	79.3289	151.849
X914	-1.31232	214.01	1.95053	28.907	-69.5885	164.847	103.5	146.601
X916	-1.29061	213.39	1.79086	39.8656	-77.7305	165.783	106.924	146.467
X920	-1.32355	213.906	1.89278	32.1957	-76.6182	164.837	104.988	145.847
X922	-1.19704	208.345	1.83826	35.554	-72.0314	164.185	104.19	145.659
X926	-1.4074	215.546	2.08973	17.1739	-84.7734	163.632	125.584	141.466
X930	-1.12367	204.286	1.75379	40.2001	-63.5411	162.506	101.4	145.001
X932	-1.66417	227.967	2.32481	3.17417	-102.746	166.782	138.137	141.642
X936	-1.01737	202.139	1.29697	73.0208	-73.5827	165.595	88.4533	148.874
X940	-1.20752	210.925	1.51181	59.5178	-85.9725	167.442	98.213	148.535
X944	-1.52193	218.893	2.22893	6.44079	-102.341	163.607	135.855	138.779
X948	-1.30259	213.604	1.73181	43.5264	-79.5552	165.643	105.844	146.314
X952	-1.44408	213.932	2.27138	1.88905	-74.3415	159.655	120.295	138.971
X954	-1.42761	217.817	1.99879	24.6807	-81.4777	164.797	108.14	145.032
X956	-1.25468	213.177	1.65079	50.5134	-81.025	167.332	96.3384	149.05
X962	-1.71358	229.456	2.69242	-21.9693	-84.4337	164.747	141.798	140.622
X972	-1.38868	217.765	1.92984	30.8611	-86.7097	166.786	113.895	145.898
X976	-1.31008	211.916	2.02293	22.0675	-78.3915	163.55	114.049	143.308
X980	-1.1364	207.388	1.623	51.5143	-68.4006	165.466	90.8255	148.869
X996	-1.11619	208.402	1.53616	59.176	-72.5071	167.651	91.1989	150.68
X998	-1.62	228.697	2.16838	16.2024	-107.909	169.766	132.402	144.916
X1002	-1.30334	216.064	1.74043	45.3788	-83.8942	168.419	101.352	149.293
X1012	-1.13565	208.499	1.5228	59.3547	-65.0162	166.339	88.1731	150.337
X1016	-1.51669	223.96	2.07981	21.6936	-102.586	168.912	128.518	144.963
X1020	-1.39392	216.984	1.77599	40.1451	-102.77	167.07	115.264	144.731
X1022	-1.28013	212.953	1.71091	45.2092	-86.3726	166.474	104.51	146.763
X1024	-1.27339	214.529	1.69346	48.233	-92.1165	168.79	106.246	148.407
X1026	-1.39093	218.287	2.02896	24.6642	-90.8464	167.546	120.751	145.487
X1030	-1.44932	218.579	2.06581	20.0584	-86.8214	165.081	117.013	143.802
X1034	-0.976194	201.993	1.34869	71.1354	-57.7085	165.897	74.9127	152.105
X1038	-1.0271	203.259	1.5019	60.0375	-56.9273	164.978	79.8727	150.64
X1040	-1.31681	215.625	1.7344	44.7821	-79.157	167.04	100.63	148.381
X1042	-1.30484	216.126	1.68311	49.2101	-73.5459	167.592	92.7294	150.35
X1044	-1.4306	219.085	1.91971	31.1095	-108.885	168.13	118.44	144.913
X1048	-1.55937	223.454	2.08412	19.1198	-97.9392	166.255	127.056	142.857
X1050	-1.28537	213.886	1.7122	45.8371	-86.2977	167.182	106.073	147.286
X1052	-1.46055	220.191	1.94449	29.3103	-95.5929	166.925	118.572	144.754

## Sheet: Table S5
Table S5. Main-effect QTNs for B. napus flowering time in eight environment trials using 3VmrMLM
Table S5.1. Main-effect QTNs for B. napus flowering time in WH2013 using 3VmrMLM
No.	Marker	Chr	Position (bp)	LOD score	Additive	Variance	R2 (%)	P-value	Significance
Significant QTNs at the critical P-value of 4.27e-09 (=0.05/m, where m is the number of markers)
1	BnvaA0137967621	A01	37967621	12.3389	-0.3287	0.0327	0.2135	4.77395e-14	SIG
2	BnvaA0206374324	A02	6374324	12.1682	-0.3459	0.1094	0.7143	7.12008e-14	SIG
3	BnvaA0208833814	A02	8833814	16.6622	-0.3773	0.1034	0.6748	1.9605e-18	SIG
4	BnvaA0209105883	A02	9105883	12.3377	0.337	0.0569	0.3712	4.78827e-14	SIG
5	BnvaA0303667072	A03	3667072	24.3806	0.4654	0.06	0.3918	3.11365e-26	SIG
6	BnvaA0309426369	A03	9426369	24.6521	-0.4678	0.068	0.4437	1.65748e-26	SIG
7	BnvaA0311891169	A03	11891169	16.9142	0.3843	0.1362	0.8891	1.08952e-18	SIG
8	BnvaA0324221829	A03	24221829	13.8137	-0.3416	0.0753	0.4918	1.51488e-15	SIG
9	BnvaA0325426194	A03	25426194	19.7398	-0.421	0.0592	0.3867	1.50969e-21	SIG
10	BnvaA0956417605	A09	56417605	22.7939	-0.4601	0.0615	0.4016	1.24253e-24	SIG
11	BnvaA0960897458	A09	60897458	41.4792	-0.6349	0.0896	0.5848	1.91187e-43	SIG
12	BnvaA1023770033	A10	23770033	84.7876	-1.0097	0.3234	2.1112	6.61525e-87	SIG
13	BnvaC0149440028	C01	49440028	10.6164	0.2978	0.0631	0.4121	2.70905e-12	SIG
14	BnvaC0202337599	C02	2337599	42.7495	-0.6492	0.2811	1.8351	1.01107e-44	SIG
15	BnvaC0325248982	C03	25248982	23.5027	-0.4555	0.0616	0.4024	2.39348e-25	SIG
16	BnvaC0501376324	C05	1376324	16.0207	-0.3694	0.0311	0.2028	8.75293e-18	SIG
17	BnvaC0611513461	C06	11513461	8.2119	-0.287	0.0824	0.5377	7.77449e-10	SIG
18	BnvaC0617894906	C06	17894906	22.5574	0.4452	0.0562	0.3668	2.15302e-24	SIG
19	BnvaC0639079766	C06	39079766	12.5457	-0.3265	0.0759	0.4953	2.94177e-14	SIG
20	BnvaC0642697888	C06	42697888	39.1462	-0.6113	0.1138	0.7427	4.235e-41	SIG
21	BnvaC0910707379	C09	10707379	17.6892	-0.3933	0.0392	0.2556	1.78968e-19	SIG
22	BnvaC0920945293	C09	20945293	9.065	0.2739	0.0325	0.2123	1.0403e-10	SIG
23	BnvaA0107448395	A01	7448395	22.9115	-0.4758	0.0973	0.6351	9.45359e-25	SIG
24	BnvaA0128166823	A01	28166823	22.9083	0.4643	0.0888	0.5799	9.52436e-25	SIG
25	BnvaA0235628580	A02	35628580	8.2771	-0.2701	0.0321	0.2095	6.66576e-10	SIG
26	BnvaA0300959892	A03	959892	9.5211	0.281	0.061	0.3982	3.5554e-11	SIG
27	BnvaA0303235155	A03	3235155	8.0325	-0.2569	0.057	0.3724	1.18752e-09	SIG
28	BnvaA0315377217	A03	15377217	10.908	0.325	0.0676	0.4412	1.36636e-12	SIG
29	BnvaA0323982775	A03	23982775	32.3968	-0.5526	0.1439	0.9391	2.60959e-34	SIG
30	BnvaA0407357995	A04	7357995	29.9332	-0.5291	0.1323	0.8639	7.88931e-32	SIG
31	BnvaA0423827472	A04	23827472	10.5351	0.2966	0.0871	0.5686	3.27889e-12	SIG
32	BnvaA0424689443	A04	24689443	30.2171	-0.526	0.1009	0.6584	4.08442e-32	SIG
33	BnvaA0501123894	A05	1123894	35.4106	-0.5761	0.1376	0.898	2.42e-37	SIG
34	BnvaA0510144206	A05	10144206	22.3741	0.4437	0.0804	0.5246	3.29691e-24	SIG
35	BnvaA0522479673	A05	22479673	57.7882	-0.779	0.108	0.7047	7.97424e-60	SIG
36	BnvaA0611420251	A06	11420251	19.6173	0.4148	0.0421	0.2747	2.00782e-21	SIG
37	BnvaA0617525695	A06	17525695	13.8744	-0.342	0.0417	0.2724	1.31441e-15	SIG
38	BnvaA0901079792	A09	1079792	11.804	-0.3208	0.0274	0.1789	1.67142e-13	SIG
39	BnvaA0903898067	A09	3898067	11.6352	-0.3122	0.0277	0.181	2.4826e-13	SIG
40	BnvaA0952572126	A09	52572126	18.4684	0.4026	0.0399	0.2603	2.91355e-20	SIG
41	BnvaA0960997960	A09	60997960	8.5035	-0.2733	0.0716	0.4672	3.90716e-10	SIG
42	BnvaC0101528714	C01	1528714	19.4683	-0.468	0.1939	1.2656	2.84012e-21	SIG
43	BnvaC0114572830	C01	14572830	9.6864	-0.2832	0.0799	0.5217	2.40986e-11	SIG
44	BnvaC0116727375	C01	16727375	8.1741	-0.3139	0.0771	0.5035	8.50097e-10	SIG
45	BnvaC0144704788	C01	44704788	8.7461	0.2685	0.0649	0.4238	2.20538e-10	SIG
46	BnvaC0216494637	C02	16494637	57.8347	0.7802	0.1219	0.7955	7.16163e-60	SIG
47	BnvaC0222053776	C02	22053776	27.5806	-0.4993	0.0658	0.4294	1.84951e-29	SIG
48	BnvaC0248688976	C02	48688976	15.2216	0.3704	0.0401	0.2618	5.6502e-17	SIG
49	BnvaC0373823069	C03	73823069	22.4745	-0.4443	0.0393	0.2565	2.61036e-24	SIG
50	BnvaC0400292560	C04	292560	9.8353	-0.3032	0.0476	0.311	1.69777e-11	SIG
51	BnvaC0700537479	C07	537479	13.1343	0.3339	0.0458	0.2992	7.42015e-15	SIG
52	BnvaC0800086211	C08	86211	18.0416	-0.3939	0.0492	0.3213	7.87425e-20	SIG
53	BnvaC0806337771	C08	6337771	16.3397	0.3733	0.0945	0.6166	4.15956e-18	SIG
54	BnvaC0958880973	C09	58880973	7.7358	0.2525	0.0559	0.3652	2.39418e-09	SIG
55	BnvaC0963703448	C09	63703448	25.3175	-0.4817	0.1738	1.1343	3.53501e-27	SIG
Suggested QTNs with the LOD score ≥ 3.0 but the P-value > 0.05/m, where m is the number of markers
1	BnvaA0226135212	A02	26135212	3.6954	-0.1898	0.0352	0.2301	3.70421e-05	SUG
2	BnvaA0310735840	A03	10735840	7.3782	0.2985	0.0886	0.5785	5.57726e-09	SUG
3	BnvaA0908241233	A09	8241233	7.4899	0.2483	0.0599	0.3912	4.28216e-09	SUG
4	BnvaA0930995309	A09	30995309	4.5497	-0.2329	0.0541	0.3531	4.71113e-06	SUG
5	BnvaA1004080613	A10	4080613	4.7361	-0.1956	0.0279	0.1823	3.01056e-06	SUG
6	BnvaC0201423673	C02	1423673	6.0107	-0.221	0.0416	0.2712	1.43205e-07	SUG
7	BnvaC0725439404	C07	25439404	6.5479	-0.2409	0.0235	0.1533	3.99241e-08	SUG
8	BnvaC0800526026	C08	526026	6.9862	0.241	0.0569	0.3711	1.4116e-08	SUG
9	BnvaC0834650974	C08	34650974	6.8471	0.2655	0.0599	0.391	1.96291e-08	SUG
10	BnvaC0915454925	C09	15454925	4.2223	-0.2002	0.0379	0.2474	1.03622e-05	SUG
Table S5.2. Main-effect QTNs for B. napus flowering time in WH2014 using 3VmrMLM
No.	Marker	Chr	Position (bp)	LOD score	Additive	Variance	R2 (%)	P-value	Significance
Significant QTNs at the critical P-value of 4.27e-09 (=0.05/m, where m is the number of markers)
1	BnvaA0201935483	A02	1935483	15.4753	1.0901	0.3737	0.3949	3.12535e-17	SIG
2	BnvaA0202001103	A02	2001103	41.5664	1.8504	0.9761	1.0316	1.56257e-43	SIG
3	BnvaA0209020851	A02	9020851	24.6682	1.3636	0.6392	0.6755	1.59683e-26	SIG
4	BnvaA0309244872	A03	9244872	8.8866	0.7898	0.304	0.3213	1.58374e-10	SIG
5	BnvaA0309359501	A03	9359501	29.0321	1.4981	0.513	0.5422	6.37794e-31	SIG
6	BnvaA0600890093	A06	890093	8.7509	0.8076	0.1915	0.2023	2.18029e-10	SIG
7	BnvaA0607368893	A06	7368893	19.8415	-1.2101	1.3808	1.4592	1.19164e-21	SIG
8	BnvaA0645905256	A06	45905256	14.9739	1.0391	1.0616	1.1219	1.00751e-16	SIG
9	BnvaA0715773608	A07	15773608	24.6458	1.3987	0.5535	0.585	1.68201e-26	SIG
10	BnvaA0924519761	A09	24519761	9.2902	-0.8125	0.2298	0.2429	6.1211e-11	SIG
11	BnvaA1024056139	A10	24056139	49.9614	-2.0715	1.1042	1.167	5.74931e-52	SIG
12	BnvaC0202402023	C02	2402023	8.8206	-0.7868	0.2797	0.2956	1.85002e-10	SIG
13	BnvaC0230728809	C02	30728809	57.9178	2.2733	1.0701	1.1309	5.91069e-60	SIG
14	BnvaC0327148748	C03	27148748	25.1326	1.3808	0.7073	0.7475	5.43083e-27	SIG
15	BnvaC0468477331	C04	68477331	20.2805	-1.2259	0.3965	0.419	4.29083e-22	SIG
16	BnvaC0504346432	C05	4346432	8.7377	0.7885	0.4989	0.5273	2.24912e-10	SIG
17	BnvaC0545130377	C05	45130377	11.3819	-0.9019	0.5879	0.6213	4.49552e-13	SIG
18	BnvaC0800912878	C08	912878	7.9368	-0.7501	0.5017	0.5302	1.48879e-09	SIG
19	BnvaC0801254348	C08	1254348	7.6184	-0.7276	0.5251	0.5549	3.1602e-09	SIG
20	BnvaC0840962037	C08	40962037	12.0697	0.9265	0.2613	0.2762	8.96843e-14	SIG
21	BnvaC0901588603	C09	1588603	22.2347	1.2936	0.6985	0.7382	4.55783e-24	SIG
22	BnvaC0919175371	C09	19175371	8.6175	-0.8673	0.7214	0.7624	2.98624e-10	SIG
23	BnvaA0137441655	A01	37441655	10.582	0.8742	0.3561	0.3763	2.93711e-12	SIG
24	BnvaA0226136261	A02	26136261	17.0144	1.1221	0.2643	0.2793	8.62534e-19	SIG
25	BnvaA0314038949	A03	14038949	9.7372	-0.8344	0.4749	0.5019	2.13851e-11	SIG
26	BnvaA0317024561	A03	17024561	41.9335	1.8546	0.6347	0.6708	6.68168e-44	SIG
27	BnvaA0328189463	A03	28189463	34.0593	1.6443	0.5805	0.6135	5.53883e-36	SIG
28	BnvaA0401192072	A04	1192072	7.5355	0.7522	0.254	0.2684	3.84443e-09	SIG
29	BnvaA0642592099	A06	42592099	26.5211	-1.4701	0.7449	0.7873	2.16241e-28	SIG
30	BnvaA0719664690	A07	19664690	28.7104	1.4871	0.5203	0.5498	1.34494e-30	SIG
31	BnvaA0730509162	A07	30509162	11.5309	0.9175	0.8053	0.851	3.16991e-13	SIG
32	BnvaA0800988445	A08	988445	8.2905	0.7603	0.3409	0.3603	6.45878e-10	SIG
33	BnvaA0907453669	A09	7453669	16.5537	1.1795	0.9911	1.0475	2.52522e-18	SIG
34	BnvaA0910549146	A09	10549146	12.6728	0.9575	0.3137	0.3315	2.18489e-14	SIG
35	BnvaA0954681129	A09	54681129	12.4297	-0.9419	0.3061	0.3235	3.85947e-14	SIG
36	BnvaA0959594866	A09	59594866	25.726	1.4359	0.6592	0.6966	1.36926e-27	SIG
37	BnvaA0960246792	A09	60246792	14.3488	1.0282	0.5676	0.5999	4.33807e-16	SIG
38	BnvaA1005341120	A10	5341120	60.179	2.3353	1.2903	1.3636	3.17874e-62	SIG
39	BnvaA1012971273	A10	12971273	29.2884	1.5102	0.4584	0.4845	3.51996e-31	SIG
40	BnvaA1024445960	A10	24445960	8.0754	-0.7507	0.5617	0.5937	1.07308e-09	SIG
41	BnvaC0154134710	C01	54134710	16.4761	1.0939	1.0679	1.1285	3.02596e-18	SIG
42	BnvaC0209636150	C02	9636150	22.4562	1.3061	0.5618	0.5937	2.72387e-24	SIG
43	BnvaC0214987250	C02	14987250	8.6119	0.7899	0.3088	0.3264	3.02562e-10	SIG
44	BnvaC0223785931	C02	23785931	21.5434	1.2844	0.6374	0.6736	2.27403e-23	SIG
45	BnvaC0265210162	C02	65210162	27.5926	1.4554	0.5143	0.5435	1.79864e-29	SIG
46	BnvaC0375142352	C03	75142352	9.7729	0.8351	0.4971	0.5253	1.96612e-11	SIG
47	BnvaC0421837679	C04	21837679	25.2703	1.3949	0.667	0.7049	3.94446e-27	SIG
48	BnvaC0423230022	C04	23230022	14.0476	1.0209	0.4706	0.4973	8.76987e-16	SIG
49	BnvaC0436964220	C04	36964220	29.8994	1.5345	0.7596	0.8027	8.53269e-32	SIG
50	BnvaC0469788472	C04	69788472	22.0566	1.2853	0.3307	0.3495	6.89586e-24	SIG
51	BnvaC0517675723	C05	17675723	37.9877	1.7481	1.2644	1.3362	6.19082e-40	SIG
52	BnvaC0523386152	C05	23386152	7.8792	0.7698	0.4431	0.4683	1.70592e-09	SIG
53	BnvaC0623217799	C06	23217799	11.6257	0.9312	0.2073	0.219	2.53851e-13	SIG
54	BnvaC0640138308	C06	40138308	49.519	-2.0685	0.8003	0.8458	1.59898e-51	SIG
55	BnvaC0641253736	C06	41253736	9.3848	-0.8544	0.4584	0.4845	4.89887e-11	SIG
56	BnvaC0908739051	C09	8739051	22.4295	1.3765	1.1001	1.1626	2.89826e-24	SIG
57	BnvaC0958723208	C09	58723208	22.29	-1.2928	0.7962	0.8415	4.00806e-24	SIG
Suggested QTNs with the LOD score ≥ 3.0 but the P-value > 0.05/m, where m is the number of markers
1	BnvaA0314603803	A03	14603803	7.0604	-0.6996	0.482	0.5093	1.18402e-08	SUG
2	BnvaA0718273298	A07	18273298	4.5554	0.5592	0.2484	0.2625	4.64661e-06	SUG
3	BnvaA0957365100	A09	57365100	4.6558	-0.5672	0.3096	0.3272	3.65115e-06	SUG
4	BnvaA1020124976	A10	20124976	6.078	0.7014	0.4742	0.5012	1.21985e-07	SUG
5	BnvaA1021903319	A10	21903319	7.139	0.7086	0.3552	0.3753	9.82713e-09	SUG
Table S5.3. Main-effect QTNs for B. napus flowering time in CS2013 using 3VmrMLM
No.	Marker	Chr	Position (bp)	LOD score	Additive	Variance	R2 (%)	P-value	Significance
Significant QTNs at the critical P-value of 4.27e-09 (=0.05/m, where m is the number of markers)
1	BnvaA0208776765	A02	8776765	36.1155	-0.8147	0.152	0.7564	4.72903e-38	SIG
2	BnvaA0310151625	A03	10151625	13.0552	-0.4785	0.0574	0.2858	8.92851e-15	SIG
3	BnvaA0325426194	A03	25426194	13.1351	-0.4729	0.0752	0.3741	7.40614e-15	SIG
4	BnvaA0325784989	A03	25784989	19.0228	-0.5884	0.1775	0.8834	8.0131e-21	SIG
5	BnvaA0519689622	A05	19689622	23.0635	0.6358	0.0969	0.4823	6.64135e-25	SIG
6	BnvaA0606420435	A06	6420435	16.4726	-0.5497	0.1593	0.7928	3.05086e-18	SIG
7	BnvaA0924518838	A09	24518838	9.9732	-0.4052	0.052	0.2589	1.22769e-11	SIG
8	BnvaA0960866552	A09	60866552	49.3639	-0.9855	0.264	1.3134	2.2889e-51	SIG
9	BnvaA1023770033	A10	23770033	34.4186	-0.792	0.2001	0.9958	2.40957e-36	SIG
10	BnvaA1024056113	A10	24056113	39.958	-0.8652	0.2082	1.0361	6.46602e-42	SIG
11	BnvaC0202609369	C02	2609369	30.1787	-0.7415	0.1712	0.8517	4.46461e-32	SIG
12	BnvaC0306451621	C03	6451621	20.7362	-0.6007	0.0629	0.3128	1.48624e-22	SIG
13	BnvaC0639070745	C06	39070745	11.7967	-0.4412	0.1101	0.5477	1.70035e-13	SIG
14	BnvaC0642485813	C06	42485813	67.2036	-1.2084	0.3165	1.5748	2.84504e-69	SIG
15	BnvaC0755454986	C07	55454986	37.13	0.8333	0.1355	0.6743	4.51206e-39	SIG
16	BnvaC0800912878	C08	912878	21.6928	-0.6152	0.3374	1.679	1.60651e-23	SIG
17	BnvaA0109764240	A01	9764240	10.3212	0.4259	0.0609	0.3031	5.41945e-12	SIG
18	BnvaA0300393400	A03	393400	23.4213	0.6373	0.1162	0.5783	2.89197e-25	SIG
19	BnvaA0316277592	A03	16277592	12.8634	-0.4605	0.0885	0.4404	1.39849e-14	SIG
20	BnvaA0402899320	A04	2899320	26.9015	-0.6917	0.2524	1.2561	8.94227e-29	SIG
21	BnvaA0413113340	A04	13113340	16.7736	-0.5318	0.1003	0.4993	1.51209e-18	SIG
22	BnvaA0500922980	A05	922980	25.0596	-0.6787	0.1827	0.9088	6.43454e-27	SIG
23	BnvaA0504350100	A05	4350100	21.9613	0.6143	0.1282	0.6378	8.60647e-24	SIG
24	BnvaA0506717797	A05	6717797	14.782	-0.5026	0.0723	0.3597	1.57698e-16	SIG
25	BnvaA0540046056	A05	40046056	18.2004	-0.5548	0.0838	0.417	5.43854e-20	SIG
26	BnvaA0631696984	A06	31696984	30.8251	-0.7437	0.1309	0.6511	9.97583e-33	SIG
27	BnvaA0645334645	A06	45334645	18.1686	0.5588	0.2309	1.1491	5.85671e-20	SIG
28	BnvaA1000988146	A10	988146	24.3653	-0.6681	0.0975	0.4849	3.22628e-26	SIG
29	BnvaC0141268942	C01	41268942	9.5574	-0.3979	0.125	0.6222	3.26425e-11	SIG
30	BnvaC0143272528	C01	43272528	11.0064	-0.424	0.0539	0.2683	1.08484e-12	SIG
31	BnvaC0148877919	C01	48877919	14.7388	0.4946	0.0665	0.3308	1.74451e-16	SIG
32	BnvaC0149794685	C01	49794685	12.4777	0.4531	0.0739	0.3677	3.44935e-14	SIG
33	BnvaC0200649149	C02	649149	8.4713	-0.3772	0.0938	0.4665	4.21612e-10	SIG
34	BnvaC0223607143	C02	23607143	13.5881	0.4805	0.051	0.2539	2.56698e-15	SIG
35	BnvaC0249977603	C02	49977603	24.0018	-0.6454	0.1015	0.5051	7.50597e-26	SIG
36	BnvaC0304522418	C03	4522418	9.7603	-0.3985	0.0987	0.4909	2.02517e-11	SIG
37	BnvaC0324891429	C03	24891429	20.1405	-0.5893	0.1193	0.5934	5.94273e-22	SIG
38	BnvaC0440123620	C04	40123620	9.2392	0.3897	0.1218	0.6059	6.90172e-11	SIG
39	BnvaC0751876812	C07	51876812	10.3774	-0.415	0.0572	0.2848	4.74897e-12	SIG
40	BnvaC0843537306	C08	43537306	29.9822	0.7312	0.1524	0.7584	7.04176e-32	SIG
41	BnvaC0928548253	C09	28548253	17.2544	-0.5411	0.1157	0.5756	4.93012e-19	SIG
42	BnvaC0955851738	C09	55851738	15.6226	-0.5103	0.069	0.3431	2.21603e-17	SIG
Suggested QTNs with the LOD score ≥ 3.0 but the P-value > 0.05/m, where m is the number of markers
1	BnvaA0209680402	A02	9680402	4.2649	-0.2601	0.0528	0.2627	9.34979e-06	SUG
2	BnvaA0412907074	A04	12907074	5.4627	0.3454	0.1179	0.5866	5.28772e-07	SUG
3	BnvaA0638799219	A06	38799219	4.5488	-0.2863	0.0769	0.3826	4.72136e-06	SUG
4	BnvaA0718069035	A07	18069035	3.6105	0.2421	0.0553	0.275	4.55144e-05	SUG
5	BnvaA1004080882	A10	4080882	6.3534	-0.3183	0.0994	0.4948	6.33773e-08	SUG
6	BnvaC0104389880	C01	4389880	5.4228	-0.2937	0.0642	0.3193	5.81717e-07	SUG
7	BnvaC0233071579	C02	33071579	5.8905	0.3223	0.0621	0.309	1.90658e-07	SUG
8	BnvaC0333713884	C03	33713884	7.0312	0.3813	0.1422	0.7075	1.26862e-08	SUG
9	BnvaC0453313205	C04	53313205	6.414	0.3259	0.0523	0.2602	5.48752e-08	SUG
10	BnvaC0500232071	C05	232071	5.8191	0.3203	0.0775	0.3857	2.26008e-07	SUG
11	BnvaC0643813179	C06	43813179	6.6096	0.3279	0.096	0.4775	3.4486e-08	SUG
12	BnvaC0741987365	C07	41987365	4.5201	-0.2729	0.0584	0.2905	5.05878e-06	SUG
13	BnvaC0915454925	C09	15454925	6.7472	-0.3563	0.1198	0.596	2.48758e-08	SUG
14	BnvaC0963530812	C09	63530812	3.5687	0.2449	0.0521	0.2595	5.0376e-05	SUG
Table S5.4. Main-effect QTNs for B. napus flowering time in CS2014 using 3VmrMLM
No.	Marker	Chr	Position (bp)	LOD score	Additive	Variance	R2 (%)	P-value	Significance
Significant QTNs at the critical P-value of 4.27e-09 (=0.05/m, where m is the number of markers)
1	BnvaA0108602009	A01	8602009	13.7044	-0.6557	0.3847	1.2895	1.95606e-15	SIG
2	BnvaA0403404556	A04	3404556	17.2493	0.7117	0.1203	0.4033	4.98796e-19	SIG
3	BnvaA1020822715	A10	20822715	11.4003	0.5723	0.1891	0.6338	4.30571e-13	SIG
4	BnvaA1024056153	A10	24056153	67.1756	-1.5837	0.6266	2.1007	3.03502e-69	SIG
5	BnvaC0202402020	C02	2402020	11.3532	-0.5693	0.1274	0.4269	4.80849e-13	SIG
6	BnvaC0504378803	C05	4378803	13.6837	0.6459	0.306	1.0259	2.05295e-15	SIG
7	BnvaC0642336223	C06	42336223	26.5993	-0.9039	0.2399	0.8042	1.80339e-28	SIG
8	BnvaC0755455005	C07	55455005	30.5335	0.9808	0.1948	0.6532	1.96109e-32	SIG
9	BnvaC0800912878	C08	912878	20.6694	-0.7895	0.5535	1.8556	1.73622e-22	SIG
10	BnvaC0805521658	C08	5521658	13.7613	0.6291	0.2752	0.9226	1.71254e-15	SIG
11	BnvaA0129830271	A01	29830271	17.0153	0.7101	0.1099	0.3685	8.60757e-19	SIG
12	BnvaA0131995675	A01	31995675	19.9504	0.7696	0.2054	0.6887	9.24834e-22	SIG
13	BnvaA0207568937	A02	7568937	9.5172	-0.5169	0.1608	0.5392	3.58763e-11	SIG
14	BnvaA0209996594	A02	9996594	25.4605	-0.8819	0.2651	0.8889	2.5366e-27	SIG
15	BnvaA0307348829	A03	7348829	12.3737	0.602	0.1473	0.4939	4.40098e-14	SIG
16	BnvaA0310635197	A03	10635197	11.8172	-0.5809	0.1035	0.3469	1.62046e-13	SIG
17	BnvaA0326512009	A03	26512009	11.3963	-0.5843	0.2018	0.6766	4.34662e-13	SIG
18	BnvaA0327628918	A03	27628918	15.9762	0.6957	0.1262	0.4229	9.71065e-18	SIG
19	BnvaA0421070376	A04	21070376	25.2599	0.8744	0.1528	0.5123	4.04093e-27	SIG
20	BnvaA0508479943	A05	8479943	25.2108	0.8825	0.1927	0.6461	4.52938e-27	SIG
21	BnvaA0513847121	A05	13847121	33.0546	1.0258	0.2955	0.9906	5.68261e-35	SIG
22	BnvaA0543404886	A05	43404886	41.2197	-1.1664	0.3806	1.2761	3.48568e-43	SIG
23	BnvaA0545434403	A05	45434403	20.8682	0.8362	0.2383	0.7989	1.09339e-22	SIG
24	BnvaA0607259075	A06	7259075	11.2717	-0.5654	0.1861	0.624	5.82192e-13	SIG
25	BnvaA0620246805	A06	20246805	10.4199	-0.5425	0.1454	0.4874	4.29748e-12	SIG
26	BnvaA0635361221	A06	35361221	22.8539	-0.8346	0.1569	0.5261	1.0808e-24	SIG
27	BnvaA0639279596	A06	39279596	29.806	-0.9604	0.1977	0.6627	1.05966e-31	SIG
28	BnvaA0724359706	A07	24359706	15.2669	0.6643	0.1944	0.6518	5.08332e-17	SIG
29	BnvaA0902574488	A09	2574488	34.0141	1.0495	0.2736	0.9173	6.15024e-36	SIG
30	BnvaA0926467183	A09	26467183	19.2515	-0.7562	0.1237	0.4148	4.70529e-21	SIG
31	BnvaA0957122417	A09	57122417	12.3121	0.5997	0.1663	0.5574	5.08344e-14	SIG
32	BnvaA0959356295	A09	59356295	11.1701	0.5721	0.299	1.0023	7.38894e-13	SIG
33	BnvaC0100946679	C01	946679	13.9828	0.643	0.1968	0.6599	1.02036e-15	SIG
34	BnvaC0106468116	C01	6468116	20.2709	0.7819	0.1983	0.6649	4.38727e-22	SIG
35	BnvaC0214553900	C02	14553900	13.3098	0.627	0.1069	0.3585	4.9222e-15	SIG
36	BnvaC0226365315	C02	26365315	16.9287	0.703	0.0955	0.3203	1.05327e-18	SIG
37	BnvaC0322813360	C03	22813360	13.8278	0.6386	0.1736	0.5819	1.46596e-15	SIG
38	BnvaC0346296055	C03	46296055	20.9598	0.7956	0.1654	0.5544	8.83441e-23	SIG
39	BnvaC0365211109	C03	65211109	23.8685	0.8585	0.2149	0.7206	1.02318e-25	SIG
40	BnvaC0366869332	C03	66869332	25.5291	-0.8797	0.2041	0.6844	2.16283e-27	SIG
41	BnvaC0414380628	C04	14380628	41.5373	1.1695	0.3622	1.2141	1.67133e-43	SIG
42	BnvaC0458890902	C04	58890902	11.3803	-0.5827	0.1827	0.6127	4.51245e-13	SIG
43	BnvaC0508331797	C05	8331797	16.9911	-0.7088	0.113	0.3787	9.10675e-19	SIG
44	BnvaC0514054078	C05	14054078	21.5872	0.8012	0.1738	0.5827	2.05363e-23	SIG
45	BnvaC0553621690	C05	53621690	29.7908	0.9834	0.2454	0.8228	1.09778e-31	SIG
46	BnvaC0616008279	C06	16008279	30.7026	-0.9789	0.2403	0.8056	1.32526e-32	SIG
47	BnvaC0648592684	C06	48592684	22.0292	0.8255	0.2476	0.83	7.34886e-24	SIG
48	BnvaC0753184042	C07	53184042	17.4215	0.714	0.1898	0.6364	3.33932e-19	SIG
49	BnvaC0758538760	C07	58538760	36.3002	1.103	0.3088	1.0352	3.08273e-38	SIG
Suggested QTNs with the LOD score ≥ 3.0 but the P-value > 0.05/m, where m is the number of markers
1	BnvaA0227984405	A02	27984405	3.9274	0.3651	0.1184	0.3968	2.1116e-05	SUG
2	BnvaA0324800772	A03	24800772	5.1633	-0.3871	0.1163	0.39	1.08179e-06	SUG
3	BnvaA0414233381	A04	14233381	5.8443	-0.4705	0.22	0.7374	2.12845e-07	SUG
4	BnvaA0418117233	A04	18117233	5.3585	0.3856	0.1353	0.4534	6.78245e-07	SUG
5	BnvaA0522844469	A05	22844469	5.0787	0.3767	0.1394	0.4672	1.32428e-06	SUG
6	BnvaA0646316990	A06	46316990	6.7665	-0.4361	0.1821	0.6106	2.37641e-08	SUG
7	BnvaA0952849210	A09	52849210	5.3646	0.5638	0.3176	1.0647	6.68381e-07	SUG
8	BnvaA1024933917	A10	24933917	3.5568	0.3122	0.0774	0.2593	5.18558e-05	SUG
9	BnvaC0147768603	C01	47768603	6.7366	0.4631	0.2107	0.7063	2.55138e-08	SUG
10	BnvaC0421192828	C04	21192828	6.5545	0.454	0.1512	0.5068	3.93087e-08	SUG
Table S5.5. Main-effect QTNs for B. napus flowering time in NJ2013 using 3VmrMLM
No.	Marker	Chr	Position (bp)	LOD score	Additive	Variance	R2 (%)	P-value	Significance
Significant QTNs at the critical P-value of 4.27e-09 (=0.05/m, where m is the number of markers)
1	BnvaA0108566494	A01	8566494	37.9723	0.9682	0.2005	0.6207	6.41547e-40	SIG
2	BnvaA0205992636	A02	5992636	28.6324	-0.8218	0.1396	0.4321	1.61189e-30	SIG
3	BnvaA0303574675	A03	3574675	11.2472	0.5217	0.2139	0.6621	6.16615e-13	SIG
4	BnvaA0325758093	A03	25758093	15.5471	-0.6128	0.1526	0.4725	2.643e-17	SIG
5	BnvaA0620932784	A06	20932784	21.3905	-0.6994	0.1259	0.3897	3.24457e-23	SIG
6	BnvaA0634117914	A06	34117914	21.0737	-0.7143	0.1571	0.4864	6.77843e-23	SIG
7	BnvaA0924518838	A09	24518838	27.9909	-0.8171	0.2104	0.6515	7.13918e-30	SIG
8	BnvaA0958832962	A09	58832962	26.2516	-0.7831	0.1994	0.6173	4.04228e-28	SIG
9	BnvaA1020776970	A10	20776970	8.8316	-0.4463	0.1616	0.5004	1.80274e-10	SIG
10	BnvaA1024056153	A10	24056153	44.057	-1.0577	0.2862	0.8862	4.90677e-46	SIG
11	BnvaC0202400090	C02	2400090	29.6295	-0.8741	0.4735	1.4658	1.59581e-31	SIG
12	BnvaC0233071596	C02	33071596	22.5042	0.729	0.1091	0.3378	2.43654e-24	SIG
13	BnvaC0501376324	C05	1376324	35.8178	-0.9345	0.1989	0.6156	9.42329e-38	SIG
14	BnvaC0617894906	C06	17894906	20.6491	0.6839	0.1326	0.4104	1.82009e-22	SIG
15	BnvaC0642697888	C06	42697888	16.3499	-0.6029	0.1107	0.3426	4.06124e-18	SIG
16	BnvaC0749413351	C07	49413351	9.4968	-0.4516	0.1988	0.6153	3.76456e-11	SIG
17	BnvaC0800912878	C08	912878	10.1504	-0.4719	0.1986	0.6148	8.09446e-12	SIG
18	BnvaC0801344456	C08	1344456	40.11	-1.0086	0.2283	0.7068	4.54802e-42	SIG
19	BnvaC0920946042	C09	20946042	16.534	0.6362	0.2155	0.6673	2.64348e-18	SIG
20	BnvaA0209630071	A02	9630071	18.6871	0.6575	0.0918	0.2842	1.75085e-20	SIG
21	BnvaA0210470325	A02	10470325	18.7535	0.6494	0.148	0.4581	1.50006e-20	SIG
22	BnvaA0415577627	A04	15577627	33.7251	-0.9114	0.2107	0.6522	1.20157e-35	SIG
23	BnvaA0533907854	A05	33907854	72.984	-1.4664	0.5513	1.7066	4.5308e-75	SIG
24	BnvaA0614936256	A06	14936256	24.0317	-0.7537	0.1769	0.5475	7.00349e-26	SIG
25	BnvaA0810431720	A08	10431720	24.6533	-0.756	0.1468	0.4544	1.6529e-26	SIG
26	BnvaA0903374638	A09	3374638	32.2868	0.8849	0.2136	0.6614	3.36738e-34	SIG
27	BnvaA0914339716	A09	14339716	18.9937	-0.6641	0.11	0.3405	8.57364e-21	SIG
28	BnvaA0949862870	A09	49862870	8.5922	-0.4317	0.1367	0.4231	3.16995e-10	SIG
29	BnvaA1017453934	A10	17453934	8.8243	0.4351	0.1625	0.503	1.83395e-10	SIG
30	BnvaA1021857927	A10	21857927	29.5214	0.8397	0.2492	0.7714	2.05007e-31	SIG
31	BnvaA1026200872	A10	26200872	22.9925	-0.7257	0.1048	0.3246	7.83191e-25	SIG
32	BnvaC0113582156	C01	13582156	11.9177	0.5114	0.1204	0.3726	1.28061e-13	SIG
33	BnvaC0139475626	C01	39475626	7.6808	0.4048	0.1545	0.4784	2.72648e-09	SIG
34	BnvaC0156290671	C01	56290671	51.1161	-1.1849	0.5669	1.7551	3.98157e-53	SIG
35	BnvaC0210902501	C02	10902501	22.6485	0.7233	0.1277	0.3955	1.74226e-24	SIG
36	BnvaC0257055990	C02	57055990	16.6855	0.6114	0.1245	0.3854	1.85685e-18	SIG
37	BnvaC0306174896	C03	6174896	25.0974	-0.7846	0.1572	0.4865	5.89361e-27	SIG
38	BnvaC0307354538	C03	7354538	30.1531	-0.8508	0.2224	0.6885	4.73829e-32	SIG
39	BnvaC0346170663	C03	46170663	7.797	-0.4109	0.1295	0.401	2.0718e-09	SIG
40	BnvaC0374081411	C03	74081411	20.4661	-0.6805	0.3421	1.0592	2.78615e-22	SIG
41	BnvaC0416920164	C04	16920164	19.4258	0.6975	0.4244	1.3139	3.13574e-21	SIG
42	BnvaC0462975686	C04	62975686	16.6284	0.6134	0.0926	0.2866	2.12159e-18	SIG
43	BnvaC0500134857	C05	134857	11.6442	-0.5153	0.099	0.3065	2.43104e-13	SIG
44	BnvaC0606502986	C06	6502986	31.4158	-0.8738	0.1933	0.5983	2.53616e-33	SIG
45	BnvaC0637261125	C06	37261125	22.3302	-0.7439	0.1691	0.5235	3.65047e-24	SIG
46	BnvaC0644207225	C06	44207225	16.7402	0.6112	0.2557	0.7915	1.63472e-18	SIG
47	BnvaC0741893309	C07	41893309	23.3215	-0.7547	0.3956	1.2246	3.64604e-25	SIG
48	BnvaC0821925272	C08	21925272	16.3425	-0.6021	0.1317	0.4077	4.13251e-18	SIG
49	BnvaC0851671897	C08	51671897	11.3624	0.5136	0.1465	0.4537	4.7065e-13	SIG
50	BnvaC0912185295	C09	12185295	9.7793	0.4623	0.0731	0.2264	1.93658e-11	SIG
51	BnvaC0915327680	C09	15327680	19.4684	0.6861	0.3312	1.0254	2.83945e-21	SIG
52	BnvaC0917109955	C09	17109955	9.2354	0.4803	0.1565	0.4846	6.96479e-11	SIG
53	BnvaC0919235047	C09	19235047	10.8468	-0.4887	0.0882	0.2729	1.57748e-12	SIG
54	BnvaC0948388534	C09	48388534	7.9163	0.4418	0.1823	0.5643	1.5625e-09	SIG
Suggested QTNs with the LOD score ≥ 3.0 but the P-value > 0.05/m, where m is the number of markers
1	BnvaA0412907074	A04	12907074	6.5108	0.4354	0.187	0.5789	4.36002e-08	SUG
2	BnvaA0415277122	A04	15277122	5.6885	0.3468	0.1153	0.357	3.08533e-07	SUG
3	BnvaA0725425365	A07	25425365	6.0282	0.3591	0.1273	0.3941	1.37334e-07	SUG
4	BnvaA1017669953	A10	17669953	3.9651	0.3387	0.1031	0.3192	1.92802e-05	SUG
5	BnvaC0101287974	C01	1287974	5.6298	-0.346	0.1087	0.3364	3.54892e-07	SUG
6	BnvaC0208638457	C02	8638457	5.7126	-0.3479	0.0954	0.2952	2.91324e-07	SUG
7	BnvaC0437033333	C04	37033333	5.1116	-0.3293	0.1084	0.3356	1.22408e-06	SUG
8	BnvaC0621873994	C06	21873994	7.4693	0.399	0.0718	0.2223	4.49642e-09	SUG
Table S5.6. Main-effect QTNs for B. napus flowering time in NJ2014 using 3VmrMLM
No.	Marker	Chr	Position (bp)	LOD score	Additive	Variance	R2 (%)	P-value	Significance
Significant QTNs at the critical P-value of 4.27e-09 (=0.05/m, where m is the number of markers)
1	BnvaA0201839416	A02	1839416	19.5531	0.8851	0.3225	0.779	2.33166e-21	SIG
2	BnvaA0231396672	A02	31396672	12.5011	0.6929	0.3102	0.7494	3.26568e-14	SIG
3	BnvaA0329302316	A03	29302316	27.709	1.0323	0.236	0.5701	1.37321e-29	SIG
4	BnvaA0501911698	A05	1911698	13.9111	-0.7069	0.2821	0.6814	1.20641e-15	SIG
5	BnvaA0519689622	A05	19689622	14.269	0.7217	0.1242	0.2999	5.22765e-16	SIG
6	BnvaA0606397450	A06	6397450	12.8663	-0.702	0.1906	0.4604	1.38918e-14	SIG
7	BnvaA0619693014	A06	19693014	8.1047	-0.5527	0.1469	0.3548	1.00147e-09	SIG
8	BnvaA0634134560	A06	34134560	24.5738	-0.9788	0.232	0.5603	1.98822e-26	SIG
9	BnvaA0643213057	A06	43213057	22.9394	0.9686	0.394	0.9519	8.85993e-25	SIG
10	BnvaA0827196973	A08	27196973	30.507	1.1492	0.7096	1.7142	2.0857e-32	SIG
11	BnvaA0956413085	A09	56413085	39.4178	-1.2841	0.5936	1.4339	2.25844e-41	SIG
12	BnvaA1024056139	A10	24056139	68.9309	-1.8067	0.84	2.029	5.26454e-71	SIG
13	BnvaC0202502621	C02	2502621	13.4636	-0.694	0.3082	0.7446	3.43462e-15	SIG
14	BnvaC0409052174	C04	9052174	12.6881	0.6745	0.1009	0.2438	2.10781e-14	SIG
15	BnvaC0501376324	C05	1376324	36.6954	-1.2119	0.3345	0.8079	1.23438e-38	SIG
16	BnvaC0601536283	C06	1536283	17.7311	0.8592	0.3616	0.8735	1.62292e-19	SIG
17	BnvaC0800912878	C08	912878	28.6319	-1.0593	1.0004	2.4166	1.61383e-30	SIG
18	BnvaA0100971388	A01	971388	20.8443	-0.8806	0.226	0.5459	1.15595e-22	SIG
19	BnvaA0133044836	A01	33044836	17.326	0.8019	0.3537	0.8543	4.17212e-19	SIG
20	BnvaA0209191478	A02	9191478	24.6525	0.9656	0.2127	0.5138	1.65611e-26	SIG
21	BnvaA0224539251	A02	24539251	49.5947	1.4547	0.5415	1.3079	1.34225e-51	SIG
22	BnvaA0306475664	A03	6475664	8.0271	-0.5312	0.1844	0.4454	1.20272e-09	SIG
23	BnvaA0334840019	A03	34840019	15.1646	-0.7403	0.1443	0.3486	6.45432e-17	SIG
24	BnvaA0409819900	A04	9819900	7.6749	-0.5721	0.2994	0.7232	2.76447e-09	SIG
25	BnvaA0540253871	A05	40253871	20.8999	0.8819	0.2052	0.4957	1.01569e-22	SIG
26	BnvaA0600304035	A06	304035	16.7134	-0.7808	0.2828	0.683	1.73977e-18	SIG
27	BnvaA0607911769	A06	7911769	23.0302	0.9287	0.3243	0.7834	7.17557e-25	SIG
28	BnvaA0731217238	A07	31217238	10.5947	-0.6133	0.1072	0.259	2.85083e-12	SIG
29	BnvaA0958193308	A09	58193308	19.2481	0.8535	0.2017	0.4873	4.74221e-21	SIG
30	BnvaA1006378650	A10	6378650	11.5321	0.6575	0.1905	0.4603	3.16139e-13	SIG
31	BnvaA1016302971	A10	16302971	28.2101	1.0471	0.3444	0.8318	4.29282e-30	SIG
32	BnvaC0100814371	C01	814371	12.1497	0.7376	0.3462	0.8362	7.43586e-14	SIG
33	BnvaC0205529781	C02	5529781	12.8481	0.6811	0.133	0.3212	1.44949e-14	SIG
34	BnvaC0215626714	C02	15626714	13.7179	0.7186	0.2263	0.5467	1.89507e-15	SIG
35	BnvaC0218825225	C02	18825225	14.5581	0.7317	0.1245	0.3008	2.6604e-16	SIG
36	BnvaC0226802260	C02	26802260	29.2533	1.0835	0.2425	0.5858	3.81785e-31	SIG
37	BnvaC0228085784	C02	28085784	25.6404	0.9881	0.1951	0.4713	1.67047e-27	SIG
38	BnvaC0228237831	C02	28237831	9.9818	-0.6892	0.4682	1.1309	1.20298e-11	SIG
39	BnvaC0231673786	C02	31673786	19.2519	-0.8492	0.4389	1.0603	4.70078e-21	SIG
40	BnvaC0237119345	C02	37119345	25.4804	-0.9836	0.352	0.8504	2.42184e-27	SIG
41	BnvaC0255074734	C02	55074734	21.066	0.8931	0.3458	0.8354	6.90164e-23	SIG
42	BnvaC0258708344	C02	58708344	14.4558	-0.7891	0.3816	0.9217	3.37894e-16	SIG
43	BnvaC0405655564	C04	5655564	32.5064	1.1429	0.4059	0.9804	2.02425e-34	SIG
44	BnvaC0408189073	C04	8189073	13.043	0.6873	0.3798	0.9174	9.1865e-15	SIG
45	BnvaC0411524113	C04	11524113	10.4304	0.6172	0.3453	0.8342	4.1931e-12	SIG
46	BnvaC0636722753	C06	36722753	12.633	-0.6975	0.2278	0.5502	2.39812e-14	SIG
47	BnvaC0643075460	C06	43075460	19.0076	-0.8407	0.2409	0.5819	8.30084e-21	SIG
48	BnvaC0723234018	C07	23234018	13.6935	0.7003	0.2267	0.5475	2.00647e-15	SIG
49	BnvaC0802034576	C08	2034576	9.7528	0.6067	0.1373	0.3318	2.06115e-11	SIG
50	BnvaC0853228697	C08	53228697	13.8661	-0.7057	0.2509	0.606	1.3404e-15	SIG
Suggested QTNs with the LOD score ≥ 3.0 but the P-value > 0.05/m, where m is the number of markers
1	BnvaA0210739264	A02	10739264	6.2106	0.4781	0.2011	0.4859	8.8982e-08	SUG
2	BnvaA0313375926	A03	13375926	3.6765	-0.3742	0.1398	0.3377	3.87805e-05	SUG
3	BnvaA0407404237	A04	7404237	7.0119	-0.5128	0.2411	0.5824	1.32823e-08	SUG
4	BnvaA0415533672	A04	15533672	4.9942	0.4831	0.2334	0.5639	1.62155e-06	SUG
5	BnvaA0519633420	A05	19633420	5.203	-0.4297	0.1811	0.4375	9.8358e-07	SUG
6	BnvaA0645894172	A06	45894172	4.1558	-0.4369	0.1742	0.4208	1.21636e-05	SUG
7	BnvaA0821034570	A08	21034570	6.2382	-0.4649	0.1321	0.3191	8.33424e-08	SUG
8	BnvaA0959213395	A09	59213395	5.3443	-0.473	0.2071	0.5003	7.01683e-07	SUG
9	BnvaA0960346790	A09	60346790	5.9958	0.4621	0.2112	0.5102	1.4837e-07	SUG
10	BnvaA1024645306	A10	24645306	5.4787	0.4389	0.1885	0.4553	5.08993e-07	SUG
11	BnvaC0456603648	C04	56603648	4.6352	-0.4187	0.1493	0.3607	3.83614e-06	SUG
12	BnvaC0742545771	C07	42545771	4.5187	-0.3981	0.1335	0.3226	5.07522e-06	SUG
13	BnvaC0820285289	C08	20285289	6.1326	-0.476	0.1108	0.2676	1.07133e-07	SUG
Table S5.7. Main-effect QTNs for B. napus flowering time in CQ2013 using 3VmrMLM
No.	Marker	Chr	Position (bp)	LOD score	Additive	Variance	R2 (%)	P-value	Significance
Significant QTNs at the critical P-value of 4.27e-09 (=0.05/m, where m is the number of markers)
1	BnvaA0510759353	A05	10759353	22.4157	-1.1229	0.4023	0.6304	2.99251e-24	SIG
2	BnvaA0643294194	A06	43294194	55.3898	1.9111	0.8073	1.2651	2.03775e-57	SIG
3	BnvaA0645905256	A06	45905256	9.1446	0.6941	0.474	0.7427	8.62497e-11	SIG
4	BnvaA0958832962	A09	58832962	18.1586	-1.0004	0.326	0.5108	5.99513e-20	SIG
5	BnvaA1023668965	A10	23668965	57.6159	-1.9622	0.7694	1.2057	1.18746e-59	SIG
6	BnvaA1026497777	A10	26497777	9.9277	-0.7413	0.5017	0.7862	1.36614e-11	SIG
7	BnvaC0202116547	C02	2116547	57.4133	1.9738	0.7906	1.239	1.89696e-59	SIG
8	BnvaC0202286875	C02	2286875	14.5691	0.893	0.6823	1.0692	2.59306e-16	SIG
9	BnvaC0468528627	C04	68528627	16.2238	-0.9431	0.2172	0.3404	5.44988e-18	SIG
10	BnvaC0642518288	C06	42518288	40.4254	-1.5758	0.551	0.8634	2.19161e-42	SIG
11	BnvaC0800912878	C08	912878	27.9374	-1.2796	1.4614	2.2902	8.08276e-30	SIG
12	BnvaC0901535324	C09	1535324	21.4319	-1.116	0.3136	0.4915	2.94703e-23	SIG
13	BnvaA0108643230	A01	8643230	27.4516	1.2553	0.3483	0.5459	2.49516e-29	SIG
14	BnvaA0202001373	A02	2001373	36.3987	1.4805	0.6549	1.0262	2.45415e-38	SIG
15	BnvaA0205986962	A02	5986962	45.1881	1.6842	0.6078	0.9525	3.58389e-47	SIG
16	BnvaA0230917002	A02	30917002	22.9094	-1.1616	0.4289	0.6722	9.50097e-25	SIG
17	BnvaA0310167343	A03	10167343	36.6187	-1.4828	0.8	1.2537	1.47446e-38	SIG
18	BnvaA0316879521	A03	16879521	22.8142	-1.1639	0.3156	0.4946	1.1852e-24	SIG
19	BnvaA0403319636	A04	3319636	15.0998	-0.9047	0.1456	0.2282	7.50913e-17	SIG
20	BnvaA0132150540	A01	32150540	13.263	0.8442	0.6289	0.9855	5.4908e-15	SIG
21	BnvaA0135243294	A01	35243294	14.1705	0.8881	0.269	0.4216	6.57973e-16	SIG
22	BnvaA0206584491	A02	6584491	10.2097	0.7421	0.4285	0.6715	7.04243e-12	SIG
23	BnvaA0218762435	A02	18762435	23.7215	1.1576	0.3253	0.5099	1.43958e-25	SIG
24	BnvaA0314765461	A03	14765461	9.7525	-0.7171	0.3144	0.4927	2.06258e-11	SIG
25	BnvaA0421979526	A04	21979526	33.1452	-1.4219	0.606	0.9497	4.60646e-35	SIG
26	BnvaA0515599596	A05	15599596	18.8019	1.0226	0.3142	0.4924	1.33995e-20	SIG
27	BnvaA0524289543	A05	24289543	22.7441	-1.1413	0.2649	0.4151	1.3951e-24	SIG
28	BnvaA0607573143	A06	7573143	13.6674	0.8657	0.3664	0.5742	2.13276e-15	SIG
29	BnvaA0646248766	A06	46248766	10.7715	-0.7563	0.4591	0.7194	1.88255e-12	SIG
30	BnvaA0718908789	A07	18908789	15.4205	0.9411	0.7863	1.2323	3.55178e-17	SIG
31	BnvaA0722690251	A07	22690251	18.8448	1.0187	0.4743	0.7433	1.21278e-20	SIG
32	BnvaA0964504624	A09	64504624	34.5507	1.4344	0.6963	1.0912	1.77432e-36	SIG
33	BnvaC0102245099	C01	2245099	7.7511	-0.6449	0.4149	0.6502	2.3089e-09	SIG
34	BnvaC0136381424	C01	36381424	7.5456	-0.7598	0.5746	0.9004	3.75337e-09	SIG
35	BnvaC0141162697	C01	41162697	22.9865	-1.1445	0.2839	0.4449	7.94264e-25	SIG
36	BnvaC0213953645	C02	13953645	40.6072	1.5769	0.585	0.9167	1.43892e-42	SIG
37	BnvaC0428472196	C04	28472196	10.3026	0.7403	0.2452	0.3842	5.66113e-12	SIG
38	BnvaC0504807410	C05	4807410	7.9371	0.6945	0.3657	0.5731	1.48761e-09	SIG
39	BnvaC0607784694	C06	7784694	23.6546	1.1546	0.3603	0.5646	1.6818e-25	SIG
40	BnvaC0743636947	C07	43636947	17.0909	0.973	0.5656	0.8863	7.21697e-19	SIG
41	BnvaC0753371697	C07	53371697	11.0519	-0.8006	0.5684	0.8908	9.74975e-13	SIG
42	BnvaC0900113504	C09	113504	9.7972	0.7218	0.1773	0.2778	1.85698e-11	SIG
43	BnvaC0914579762	C09	14579762	8.8446	-0.6885	0.287	0.4498	1.74844e-10	SIG
44	BnvaC0945238719	C09	45238719	20.6143	-1.0912	0.3673	0.5756	1.97341e-22	SIG
Suggested QTNs with the LOD score ≥ 3.0 but the P-value > 0.05/m, where m is the number of markers
1	BnvaA0311682565	A03	11682565	4.5447	-0.5257	0.2636	0.413	4.76798e-06	SUG
2	BnvaA0324800785	A03	24800785	6.4004	-0.598	0.129	0.2021	5.66758e-08	SUG
3	BnvaA0625908310	A06	25908310	7.0932	-0.6192	0.3345	0.5241	1.09525e-08	SUG
4	BnvaA0806708449	A08	6708449	6.0537	-0.5624	0.2933	0.4597	1.29253e-07	SUG
5	BnvaA0900865298	A09	865298	4.0569	0.4852	0.2339	0.3666	1.54415e-05	SUG
6	BnvaA0959666516	A09	59666516	3.7152	-0.4386	0.1842	0.2886	3.52999e-05	SUG
7	BnvaC0219915374	C02	19915374	3.2996	-0.4477	0.1879	0.2945	9.69892e-05	SUG
8	BnvaC0401269221	C04	1269221	6.8842	-0.6175	0.3337	0.5229	1.79779e-08	SUG
9	BnvaC0428732293	C04	28732293	6.7803	0.6107	0.1967	0.3083	2.29994e-08	SUG
10	BnvaC0431417698	C04	31417698	3.728	0.4371	0.1715	0.2688	3.42233e-05	SUG
11	BnvaC0438557452	C04	38557452	6.4208	0.6548	0.3897	0.6107	5.39941e-08	SUG
12	BnvaC0470205579	C04	70205579	7.4441	0.6315	0.2646	0.4147	4.7721e-09	SUG
13	BnvaC0613332418	C06	13332418	4.7749	-0.556	0.2854	0.4472	2.74323e-06	SUG
Table S5.8. Main-effect QTNs for B. napus flowering time in EZ2013 using 3VmrMLM
No.	Marker	Chr	Position (bp)	LOD score	Additive	Variance	R2 (%)	P-value	Significance
Significant QTNs at the critical P-value of 4.27e-09 (=0.05/m, where m is the number of markers)
1	BnvaA0209054089	A02	9054089	9.4154	0.6531	0.4224	1.4487	4.55906e-11	SIG
2	BnvaA0231378795	A02	31378795	19.8404	0.7503	0.1401	0.4805	1.19476e-21	SIG
3	BnvaA0325520626	A03	25520626	17.5615	-0.7159	0.1824	0.6257	2.4099e-19	SIG
4	BnvaA0600965633	A06	965633	19.4952	0.7515	0.1395	0.4784	2.66785e-21	SIG
5	BnvaA0620932888	A06	20932888	25.7999	-0.8679	0.1608	0.5515	1.1535e-27	SIG
6	BnvaA0956414961	A09	56414961	28.1563	-0.9184	0.2711	0.9297	4.8643e-30	SIG
7	BnvaA1024056153	A10	24056153	56.9404	-1.3927	0.4963	1.702	5.65842e-59	SIG
8	BnvaC0201592445	C02	1592445	47.095	1.2419	0.31	1.0631	4.35109e-49	SIG
9	BnvaC0213813740	C02	13813740	54.9336	1.3721	0.3806	1.3053	5.8491e-57	SIG
10	BnvaC0241269412	C02	41269412	16.9638	0.689	0.3917	1.3433	9.70558e-19	SIG
11	BnvaC0501376324	C05	1376324	13.311	-0.605	0.0834	0.2859	4.90741e-15	SIG
12	BnvaC0545188626	C05	45188626	11.5601	-0.5812	0.1915	0.6569	2.9606e-13	SIG
13	BnvaC0603993157	C06	3993157	11.4179	0.5884	0.1705	0.5848	4.13184e-13	SIG
14	BnvaC0604037714	C06	4037714	8.9586	-0.4918	0.1608	0.5514	1.33649e-10	SIG
15	BnvaC0611522146	C06	11522146	11.3942	-0.5578	0.2494	0.8555	4.36855e-13	SIG
16	BnvaA0106143728	A01	6143728	12.4345	-0.5847	0.1783	0.6116	3.81714e-14	SIG
17	BnvaA0109480364	A01	9480364	24.1153	0.8366	0.1446	0.496	5.76693e-26	SIG
18	BnvaA0206730355	A02	6730355	16.014	0.6914	0.1813	0.6217	8.89148e-18	SIG
19	BnvaA0210788125	A02	10788125	9.1933	0.5211	0.1471	0.5044	7.68958e-11	SIG
20	BnvaA0302980346	A03	2980346	9.4021	0.5095	0.236	0.8093	4.7036e-11	SIG
21	BnvaA0312342629	A03	12342629	14.2687	-0.6298	0.2736	0.9383	5.23097e-16	SIG
22	BnvaA0325583147	A03	25583147	29.6764	-0.9416	0.2941	1.0087	1.43103e-31	SIG
23	BnvaA0329975164	A03	29975164	21.8628	-0.7971	0.3269	1.1212	1.08211e-23	SIG
24	BnvaA0512392815	A05	12392815	24.8628	-0.8518	0.1555	0.5332	1.01611e-26	SIG
25	BnvaA0610551570	A06	10551570	34.704	-1.0297	0.2495	0.8555	1.24391e-36	SIG
26	BnvaA0633282401	A06	33282401	12.2528	-0.5994	0.1507	0.5168	5.84091e-14	SIG
27	BnvaA0906122717	A09	6122717	20.8898	-0.7773	0.1651	0.5664	1.03972e-22	SIG
28	BnvaA1024798833	A10	24798833	19.1733	-0.7424	0.2935	1.0064	5.64477e-21	SIG
29	BnvaC0366097151	C03	66097151	7.9224	0.4609	0.1104	0.3787	1.54024e-09	SIG
30	BnvaC0367778984	C03	67778984	10.4605	0.5333	0.0904	0.31	3.90718e-12	SIG
31	BnvaC0400088381	C04	88381	14.0291	-0.6533	0.2426	0.8319	9.15719e-16	SIG
32	BnvaC0447986535	C04	47986535	22.9687	0.8167	0.1672	0.5736	8.27644e-25	SIG
33	BnvaC0464636384	C04	64636384	15.2272	-0.6657	0.1344	0.4609	5.57693e-17	SIG
34	BnvaC0468940899	C04	68940899	37.9252	1.0883	0.2376	0.8148	7.15555e-40	SIG
35	BnvaC0470983041	C04	70983041	7.7617	-0.4777	0.0916	0.314	2.25197e-09	SIG
36	BnvaC0503382516	C05	3382516	23.5636	0.8309	0.1692	0.5803	2.07764e-25	SIG
37	BnvaC0506664258	C05	6664258	21.8045	0.7911	0.3116	1.0688	1.23912e-23	SIG
38	BnvaC0556442464	C05	56442464	12.9148	0.6072	0.0816	0.28	1.23998e-14	SIG
39	BnvaC0605529155	C06	5529155	13.1113	0.6199	0.11	0.3773	7.83073e-15	SIG
40	BnvaC0640607916	C06	40607916	77.1038	-1.7368	0.598	2.051	3.34656e-79	SIG
41	BnvaC0735347620	C07	35347620	16.9775	-0.6893	0.4223	1.4484	9.40021e-19	SIG
42	BnvaC0745290388	C07	45290388	22.0975	0.8076	0.1334	0.4575	6.27106e-24	SIG
43	BnvaC0804283663	C08	4283663	10.7407	-0.5435	0.2306	0.7909	2.02368e-12	SIG
Suggested QTNs with the LOD score ≥ 3.0 but the P-value > 0.05/m, where m is the number of markers
1	BnvaA0306987539	A03	6987539	7.1863	-0.4404	0.1028	0.3524	8.78683e-09	SUG
2	BnvaA0309632278	A03	9632278	5.2112	-0.3714	0.0916	0.314	9.64641e-07	SUG
3	BnvaA0313984812	A03	13984812	4.8913	0.3596	0.1272	0.4362	2.07491e-06	SUG
4	BnvaA0418510541	A04	18510541	6.1216	-0.4038	0.1511	0.5181	1.09963e-07	SUG
5	BnvaA0534638539	A05	34638539	6.622	-0.4302	0.1272	0.4361	3.34863e-08	SUG
6	BnvaA0543097345	A05	43097345	7.0316	-0.447	0.1876	0.6434	1.26746e-08	SUG
7	BnvaA0918722902	A09	18722902	5.5912	-0.3851	0.1459	0.5002	3.89162e-07	SUG
8	BnvaA0965637120	A09	65637120	6.7306	0.4338	0.1655	0.5675	2.58792e-08	SUG
9	BnvaC0364080175	C03	64080175	6.925	-0.4412	0.1715	0.5881	1.63197e-08	SUG
10	BnvaC0749107816	C07	49107816	6.2114	0.4434	0.0984	0.3374	8.88153e-08	SUG
11	BnvaC0755919803	C07	55919803	7.3114	0.4425	0.07	0.2401	6.5337e-09	SUG
12	BnvaC0851498005	C08	51498005	6.5233	0.4678	0.1974	0.677	4.23314e-08	SUG
13	BnvaC0941635331	C09	41635331	5.0604	-0.3659	0.0863	0.296	1.38365e-06	SUG

## Sheet: Table S6
Table S6. Main-effect QTNs and QTN-by-environment interactions for B. napus flowering time in eight environment trials using 3VmrMLM
Main-effect QTNs for B. napus flowering time											QTN-by-environment interactions for B. napus flowering time
No.	Marker	Chr	Position (bp)	LOD score	Additive	Variance	R2 (%)	P-value	Significance		No.	Marker	Chr	Position (bp)	LOD score	Add*env1a	Add*env2	Add*env3	Add*env4	Add*env5	Add*env6	Add*env7	Add*env8	Variance	R2 (%)	P-value	Significance
Significant QTNs at the critical P-value of 4.27e-09 (=0.05/m, where m is the number of markers)											Significant QTNs at the critical P-value of 4.27e-09 (=0.05/m, where m is the number of markers)
1	BnvaA0100280451	A01	280451	48.5625	-0.7294	0.113	0.1628	1.46078e-50	SIG		1	BnvaA0103064999	A01	3064999	24.9324	-0.1299	-0.1934	0.3243	-0.6876	0.4463	0.8966	0.0857	-0.742	0.2741	0.395	9.19117e-22	SIG
2	BnvaA0103041256	A01	3041256	7.7584	0.3028	0.039	0.0562	2.26969e-09	SIG		2	BnvaA0107152286	A01	7152286	17.3725	-0.2325	-0.6399	0.089	-0.0889	-0.4091	-0.0143	0.7587	0.537	0.1889	0.2722	1.37724e-14	SIG
3	BnvaA0110375352	A01	10375352	15.1054	0.4078	0.0363	0.0523	7.41041e-17	SIG		3	BnvaA0200961480	A02	961480	32.6951	-0.0638	0.0261	-0.0294	-0.4839	-0.3854	1.4685	0.0014	-0.5336	0.3537	0.5097	3.09541e-29	SIG
4	BnvaA0137997403	A01	37997403	18.0556	0.4449	0.0501	0.0722	7.62024e-20	SIG		4	BnvaA0316879521	A03	16879521	42.4341	0.3883	0.2924	0.2179	-0.0853	-1.7228	-0.1546	0.3528	0.7113	0.4892	0.7049	1.07606e-38	SIG
5	BnvaA0201946991	A02	1946991	12.8184	0.3716	0.1064	0.1533	1.55372e-14	SIG		5	BnvaA0329323505	A03	29323505	39.1019	-0.4783	-0.4653	-0.749	-0.4381	-0.324	0.7951	0.5745	1.0852	0.4304	0.6202	1.88804e-35	SIG
6	BnvaA0203050398	A02	3050398	38.4294	0.6496	0.1091	0.1573	2.22652e-40	SIG		6	BnvaA0306098490	A03	6098490	34.4314	-0.2606	-0.0629	-0.4492	-0.1769	-0.1988	1.62	-0.0588	-0.4128	0.3928	0.5661	6.45593e-31	SIG
7	BnvaA0206152101	A02	6152101	13.1424	-0.3806	0.0501	0.0721	7.2805e-15	SIG		7	BnvaA0324861388	A03	24861388	46.2303	-0.2132	-0.2645	-0.0704	-0.8549	-0.1243	1.7568	0.0718	-0.3012	0.5061	0.7293	2.12757e-42	SIG
8	BnvaA0206462942	A02	6462942	32.7883	-0.596	0.1864	0.2686	1.05334e-34	SIG		8	BnvaA0326932605	A03	26932605	11.9612	0.222	0.2895	0.2522	-0.0208	-0.2372	-0.8304	0.2845	0.0402	0.1282	0.1847	1.43664e-09	SIG
9	BnvaA0208833814	A02	8833814	21.699	-0.4833	0.1695	0.2443	1.58353e-23	SIG		9	BnvaA0406097547	A04	6097547	66.4296	-0.4083	-0.4222	-0.5133	0.3969	-0.7527	2.0842	0.0604	-0.445	0.7348	1.0588	3.30946e-62	SIG
10	BnvaA0209020851	A02	9020851	14.1731	0.3897	0.0523	0.0753	6.54008e-16	SIG		10	BnvaA0501993612	A05	1993612	20.0304	-0.3738	0.306	-0.6939	-0.3604	0.7528	0.1116	-0.237	0.4947	0.2156	0.3107	4.28723e-17	SIG
11	BnvaA0230917002	A02	30917002	22.1828	-0.5005	0.0794	0.1144	5.14292e-24	SIG		11	BnvaA0542071520	A05	42071520	50.1832	-0.5525	0.0779	-0.6355	-0.3627	0.6324	1.3428	-1.032	0.5295	0.5494	0.7917	2.90668e-46	SIG
12	BnvaA0307192560	A03	7192560	9.9218	-0.3257	0.0626	0.0902	1.38531e-11	SIG		12	BnvaA0715753161	A07	15753161	23.9435	-0.2158	-0.1162	-0.2556	-0.1618	0.4851	1.1181	-0.1637	-0.6901	0.2675	0.3855	8.11064e-21	SIG
13	BnvaA0309244872	A03	9244872	8.5732	0.3032	0.0448	0.0646	3.31511e-10	SIG		13	BnvaA0702189287	A07	2189287	27.8983	-0.133	0.4763	-0.0409	-0.111	-0.1765	1.1839	-0.5575	-0.6414	0.3017	0.4348	1.31081e-24	SIG
14	BnvaA0311893956	A03	11893956	12.9426	0.3727	0.1255	0.1808	1.16197e-14	SIG		14	BnvaA0827196633	A08	27196633	24.7328	-0.0068	0.0615	-0.2639	0.212	-0.5019	0.0085	-0.6608	1.1515	0.2666	0.3842	1.42669e-21	SIG
15	BnvaA0324221829	A03	24221829	16.4297	-0.4203	0.114	0.1643	3.3715e-18	SIG		15	BnvaA0800379173	A08	379173	44.224	0.379	0.779	0.3732	-0.4219	0.0127	-0.1067	0.5555	-1.5707	0.4819	0.6944	1.93365e-40	SIG
16	BnvaA0328997706	A03	28997706	14.8507	0.4218	0.0833	0.1201	1.34324e-16	SIG		16	BnvaC0116442798	C01	16442798	40.9711	0.1207	0.5523	-0.1462	0.1539	-1.5777	0.683	-0.2644	0.4785	0.4524	0.6519	2.86439e-37	SIG
17	BnvaA0501753505	A05	1753505	30.1339	-0.5709	0.2621	0.3777	4.95381e-32	SIG		17	BnvaC0147313114	C01	47313114	38.2338	-0.556	-0.4879	-0.3561	-0.0905	0.0056	1.5501	-0.4345	0.3694	0.4263	0.6143	1.31819e-34	SIG
18	BnvaA0510759353	A05	10759353	28.2553	-0.5537	0.0972	0.1401	3.86563e-30	SIG		18	BnvaC0150758439	C01	50758439	16.6325	-0.4633	0.2968	-0.3959	-0.6601	0.3973	0.6192	-0.0109	0.2169	0.1855	0.2673	6.80736e-14	SIG
19	BnvaA0515302306	A05	15302306	16.6059	-0.423	0.0343	0.0495	2.23582e-18	SIG		19	BnvaC0201592445	C02	1592445	58.9182	-0.4049	0.4959	-1.1001	-0.2164	1.627	0.5669	-0.2204	-0.748	0.6554	0.9445	7.97189e-55	SIG
20	BnvaA0519689622	A05	19689622	35.3133	0.6241	0.093	0.134	3.03187e-37	SIG		20	BnvaC0209413473	C02	9413473	34.9244	0.1093	-0.1895	0.0549	-0.0931	-0.5181	1.2209	0.4411	-1.0254	0.3831	0.552	2.14881e-31	SIG
21	BnvaA0543140920	A05	43140920	36.6647	0.631	0.1075	0.155	1.32521e-38	SIG		21	BnvaC0201725158	C02	1725158	12.6186	-0.2961	-0.2381	0.0942	0.0474	0.6904	-0.4632	-0.2491	0.4144	0.1351	0.1946	3.59688e-10	SIG
22	BnvaA0607369849	A06	7369849	14.8662	0.4021	0.0338	0.0488	1.29539e-16	SIG		22	BnvaC0209910049	C02	9910049	47.2233	-0.2691	-0.0497	-0.3269	-0.0441	0.6619	1.5411	-0.8234	-0.69	0.5189	0.7477	2.27913e-43	SIG
23	BnvaA0619731495	A06	19731495	11.9461	-0.3779	0.1163	0.1675	1.19795e-13	SIG		23	BnvaC0230403413	C02	30403413	28.6555	-0.3512	-0.5588	-0.6014	-0.0805	0.8369	0.7311	-0.4726	0.4965	0.3136	0.4519	2.44924e-25	SIG
24	BnvaA0646354862	A06	46354862	24.3105	-0.513	0.2594	0.3737	3.6648e-26	SIG		24	BnvaC0237450744	C02	37450744	21.9187	-0.1323	-0.4658	0.2492	0.6211	0.153	0.4505	0.1137	-0.9894	0.2376	0.3424	6.91323e-19	SIG
25	BnvaA0820244441	A08	20244441	21.7301	0.4841	0.0468	0.0675	1.47327e-23	SIG		25	BnvaC0327148748	C03	27148748	30.9154	-0.5028	-0.158	-0.2567	-0.7304	0.0676	1.2953	-0.062	0.347	0.3355	0.4834	1.62332e-27	SIG
26	BnvaA0827207043	A08	27207043	12.2064	0.3826	0.0918	0.1322	6.5118e-14	SIG		26	BnvaC0364354328	C03	64354328	60.8418	-0.5222	-0.6177	-0.3396	-0.4254	-0.1852	1.8639	-0.5628	0.789	0.6748	0.9724	1.02947e-56	SIG
27	BnvaA0956413085	A09	56413085	25.1097	-0.5285	0.1002	0.1444	5.72783e-27	SIG		27	BnvaC0538307735	C05	38307735	62.4666	-0.125	-0.7753	-0.2777	0.0715	-0.41	2.117	-0.1225	-0.478	0.699	1.0073	2.60797e-58	SIG
28	BnvaA1015300444	A10	15300444	9.3635	-0.3222	0.1009	0.1455	5.15166e-11	SIG		28	BnvaC0601536283	C06	1536283	15.2538	-0.2553	-0.6609	-0.3044	-0.1749	0.1046	0.6897	-0.0143	0.6155	0.1864	0.2686	1.31902e-12	SIG
29	BnvaA1023770033	A10	23770033	23.2213	-0.5002	0.0793	0.1142	4.60225e-25	SIG		29	BnvaC0648743697	C06	48743697	26.1847	-0.1912	0.2309	-0.2512	-0.7379	0.2704	1.2082	-0.2025	-0.3266	0.2973	0.4284	5.79982e-23	SIG
30	BnvaA1024056153	A10	24056153	117.881	-1.1589	0.3429	0.4942	4.54395e-120	SIG		30	BnvaC0919115461	C09	19115461	19.9402	-0.4238	-0.3562	-0.2452	-0.1739	0.417	1.0332	-0.2905	0.0394	0.2155	0.3106	5.21846e-17	SIG
31	BnvaA1024656277	A10	24656277	9.7397	-0.3266	0.1067	0.1537	2.12594e-11	SIG		31	BnvaC0954288522	C09	54288522	13.587	-0.5193	-0.2387	-0.3042	-0.3	0.1461	0.6449	0.0398	0.5315	0.1538	0.2216	4.62551e-11	SIG
32	BnvaA1026498143	A10	26498143	9.9544	-0.3269	0.0912	0.1314	1.28302e-11	SIG		32	BnvaC0967693730	C09	67693730	67.1702	0.26	0.4033	0.4065	-0.1437	-0.7892	-1.8514	0.8433	0.8711	0.7421	1.0694	6.18327e-63	SIG
33	BnvaC0101782512	C01	1782512	37.0849	0.6372	0.1488	0.2144	5.0087e-39	SIG		Suggested QTNs with the LOD score ≥ 3.0 but the P-value > 0.05/m, where m is the number of markers
34	BnvaC0108518752	C01	8518752	36.6364	0.6307	0.121	0.1744	1.41512e-38	SIG		1	BnvaA0201683883	A02	1683883	5.994	-0.085	-0.0181	-0.0263	-0.0967	0.3475	0.46	-0.3102	-0.2712	0.065	0.0936	0.000259542	SUG
35	BnvaC0149529210	C01	49529210	19.6273	0.4594	0.13	0.1873	1.96158e-21	SIG		2	BnvaA0201946991	A02	1946991	4.5326	-0.3778	-0.0408	-0.2126	-0.0289	0.1895	0.1507	-0.0502	0.3701	0.0486	0.07	0.00396364	SUG
36	BnvaC0201592445	C02	1592445	59.1309	0.8107	0.1311	0.1889	3.58203e-61	SIG		3	BnvaA0202947166	A02	2947166	8.9579	-0.3711	-0.0926	-0.2076	0.0177	-0.0653	0.7401	-0.128	0.1067	0.0962	0.1386	7.24515e-07	SUG
37	BnvaC0202116547	C02	2116547	43.0472	0.6912	0.0995	0.1434	5.07695e-45	SIG		4	BnvaA1024426121	A10	24426121	9.3431	0.3213	0.2843	0.003	0.2372	-0.1374	-0.7395	0.0696	-0.0386	0.1015	0.1463	3.29884e-07	SUG
38	BnvaC0202516605	C02	2516605	23.4974	-0.5037	0.1127	0.1624	2.42329e-25	SIG
39	BnvaC0208122753	C02	8122753	18.8044	0.4527	0.096	0.1384	1.33246e-20	SIG
40	BnvaC0213813740	C02	13813740	41.7621	0.6799	0.0936	0.1349	9.93561e-44	SIG
41	BnvaC0218361102	C02	18361102	15.2733	-0.4167	0.0615	0.0886	5.00795e-17	SIG
42	BnvaC0230708026	C02	30708026	38.1978	0.6476	0.1051	0.1515	3.80599e-40	SIG
43	BnvaC0233071497	C02	33071497	41.6582	0.6819	0.1248	0.1798	1.26347e-43	SIG
44	BnvaC0241269412	C02	41269412	9.1295	0.3123	0.0805	0.116	8.93714e-11	SIG
45	BnvaC0250513451	C02	50513451	22.0331	0.4915	0.115	0.1657	7.28335e-24	SIG
46	BnvaC0306451621	C03	6451621	67.2782	-0.8721	0.1314	0.1894	2.39464e-69	SIG
47	BnvaC0325248982	C03	25248982	11.2469	-0.3469	0.0356	0.0513	6.17002e-13	SIG
48	BnvaC0409052174	C04	9052174	65.5642	0.8535	0.1612	0.2323	1.2554e-67	SIG
49	BnvaC0424553255	C04	24553255	11.3514	-0.3647	0.0861	0.1241	4.82894e-13	SIG
50	BnvaC0440527497	C04	40527497	9.8533	0.3839	0.1437	0.2071	1.62747e-11	SIG
51	BnvaC0444444339	C04	44444339	8.1695	0.2963	0.0492	0.071	8.59356e-10	SIG
52	BnvaC0459624265	C04	59624265	21.9747	-0.4996	0.0815	0.1175	8.34153e-24	SIG
53	BnvaC0501376324	C05	1376324	32.754	-0.5957	0.0806	0.1162	1.14051e-34	SIG
54	BnvaC0617894906	C06	17894906	33.4999	0.6026	0.1028	0.1481	2.02475e-35	SIG
55	BnvaC0622111612	C06	22111612	28.1393	0.557	0.0741	0.1068	5.05929e-30	SIG
56	BnvaC0639079766	C06	39079766	7.6042	-0.287	0.0586	0.0844	3.2676e-09	SIG
57	BnvaC0642337952	C06	42337952	21.3014	-0.4788	0.0455	0.0656	3.99211e-23	SIG
58	BnvaC0642697888	C06	42697888	63.6402	-0.8387	0.2139	0.3082	1.06943e-65	SIG
59	BnvaC0710522609	C07	10522609	13.5868	0.3846	0.0958	0.138	2.57515e-15	SIG
60	BnvaC0749413351	C07	49413351	16.4382	-0.42	0.1718	0.2476	3.3056e-18	SIG
61	BnvaC0755455005	C07	55455005	43.111	0.6904	0.0963	0.1388	4.37994e-45	SIG
62	BnvaC0757389746	C07	57389746	18.7212	0.449	0.0638	0.092	1.61713e-20	SIG
63	BnvaC0800912878	C08	912878	82.4918	-0.9681	0.8354	1.2039	1.32504e-84	SIG
64	BnvaC0805521658	C08	5521658	9.0243	0.3111	0.0671	0.0968	1.14493e-10	SIG
65	BnvaC0840892722	C08	40892722	27.2614	0.547	0.0985	0.142	3.87904e-29	SIG
66	BnvaC0910707379	C09	10707379	19.802	-0.4657	0.0548	0.0789	1.30628e-21	SIG
67	BnvaC0918948418	C09	18948418	18.6606	0.4538	0.1218	0.1756	1.8623e-20	SIG
68	BnvaC0966586828	C09	66586828	23.8282	-0.5109	0.0693	0.0998	1.1235e-25	SIG
Suggested QTNs with the LOD score ≥ 3.0 but the P-value > 0.05/m, where m is the number of markers
1	BnvaA0206860986	A02	6860986	4.5966	0.2215	0.0465	0.067	4.20864e-06	SUG
2	BnvaA0209495717	A02	9495717	4.75	0.246	0.0412	0.0593	2.91195e-06	SUG
3	BnvaA0310015175	A03	10015175	4.8982	-0.2285	0.0341	0.0492	2.04102e-06	SUG
4	BnvaA0724389274	A07	24389274	5.6323	0.2709	0.0516	0.0743	3.5278e-07	SUG
5	BnvaA0960997960	A09	60997960	6.1837	-0.2655	0.0675	0.0973	9.48789e-08	SUG
6	BnvaC0102245099	C01	2245099	3.9939	-0.209	0.0436	0.0628	1.79818e-05	SUG
7	BnvaC0320505685	C03	20505685	6.1247	-0.2805	0.0525	0.0756	1.09164e-07	SUG
8	BnvaC0436604745	C04	36604745	6.5833	-0.2661	0.0702	0.1011	3.67092e-08	SUG
9	BnvaC0542851982	C05	42851982	5.3035	0.2405	0.0385	0.0555	7.73554e-07	SUG
10	BnvaC0909561681	C09	9561681	6.8086	-0.3186	0.1006	0.1449	2.15056e-08	SUG
11	BnvaC0963530812	C09	63530812	6.7869	0.2783	0.0674	0.0971	2.26394e-08	SUG
a env1: WH2013; env2: EZ2013; env3: CS2013; env4: NJ2013; env5: CQ2013; env6: WH2014; env7: CS2014; env8: NJ2014.

## Sheet: Table S7
Table S7. Common main-effect QTNs and their candidate genes for reaction norm parameters of B. napus flowering time based on climatic index by using 3VmrMLM
Genome-wide association studies										Comparative genomics analysis
Reaction norm parameters for flowering time	Marker	Chr	Position (bp)	LOD	Additive	Variance	R2 (%)	P-value		Gene ID	abbr	Arabidopsis homologs	Function
Intercept based on PRCP133-169	BnvaA0542180914	A05	42180914	12.9311	0.574	0.2102	1.7907	1.19354e-14		BnaA05G0456200ZS	COL9	AT3G07650	Zinc finger protein CONSTANS-LIKE 9
Slope based on PRCP133-169	BnvaA0542181513	A05	42181513	8.7955	-2.173	3.221	1.0951	1.96293e-10
Intercept based on PRCP3-41	BnvaA0206425499	A02	6425499	14.6345	0.3913	0.1071	2.2078	2.22568e-16		BnaA02G0118200ZS	VIN3	AT5G57380	The complex has a role in establishing FLC (FLOWERING LOCUS C) repression during vernalization.
Slope based on PRCP3-41	BnvaA0206554731	A02	6554731	21.3379	-3.4313	3.8141	2.0231	3.66747e-23
Intercept based on TAVG10-19	BnvaA0645914406	A06	45914406	8.0489	3.0645	9.351	1.987	1.14234e-09		BnaA06G0401700ZS	UBC2	AT2G02760	ubiquitin conjugating enzyme UBC2
Intercept based on TAVG135-144	BnvaA0645914406	A06	45914406	15.2813	-1.7013	2.8819	4.3302	4.91541e-17
Slope based on TAVG135-144	BnvaA0645914406	A06	45964406	11.0608	0.0337	0.0011	2.8361	9.54861e-13
Intercept based on TAVG135-144	BnvaC0202024192	C02	2024192	5.2739	-1.0164	0.539	0.8099	8.30221e-09		BnaC02G0031100ZS	RUG1	AT5G08280	Encodes a protein with porphobilinogen deaminase activity
Intercept based on TAVG135-144	BnvaC0209413340	C02	9413340	15.2033	-1.7033	0.7165	1.0766	5.89637e-17		BnaC02G0132800ZS	DDB2	AT5G58760	Encodes a DDB1a interacting protein DDB2 required for UV-B tolerance
Slope based on TAVG135-144	BnvaC0209413340	C02	9463340	10.6437	0.0331	0.0003	0.6798	2.54088e-12

## Sheet: Table S8
Table S8. Differentially expressed genes in two spring cultivars Westar and No2127 before and after vernalization
GeneID	Sample A	Sample B	Base mean A	Base mean B	Base mean	log2FoldChange	lfcSE	Stat	P value	Padj
BnaA03G0206900ZS	DAP-147	DAP-24	1238.53	16.3676	627.45	6.22963	0.309072	20.1559	2.38893e-90	9.00412e-86
BnaA06G0389600ZS	DAP-147	DAP-24	3.46576	835.91	419.688	-7.93764	0.409405	-19.3882	9.701e-84	1.8282e-79
BnaC04G0551600ZS	DAP-147	DAP-24	13.5885	491.15	252.369	-5.17493	0.27912	-18.5402	9.78686e-77	1.22959e-72
BnaA01G0083000ZS	DAP-147	DAP-24	309.71	2413.08	1361.4	-2.96193	0.16358	-18.1069	2.81249e-73	2.65013e-69
BnaA04G0236300ZS	DAP-147	DAP-24	13.4099	375.911	194.66	-4.80869	0.27925	-17.22	1.87937e-66	1.41671e-62
BnaC09G0137500ZS	DAP-147	DAP-24	57.7322	758.902	408.317	-3.71808	0.220743	-16.8435	1.17151e-63	7.35921e-60
BnaA03G0591100ZS	DAP-147	DAP-24	3.40923	636.656	320.032	-7.54818	0.468882	-16.0983	2.62322e-58	1.41245e-54
BnaC08G0180100ZS	DAP-147	DAP-24	405.963	3935.89	2170.93	-3.27779	0.204295	-16.0444	6.25755e-58	2.94817e-54
BnaC06G0056100ZS	DAP-147	DAP-24	13.4922	1367.41	690.451	-6.67235	0.420971	-15.8499	1.40776e-56	5.89554e-53
BnaC04G0502100ZS	DAP-147	DAP-24	250.456	1747.36	998.908	-2.80345	0.179257	-15.6393	3.93247e-55	1.46234e-51
BnaA05G0100700ZS	DAP-147	DAP-24	398.458	4304.35	2351.4	-3.43343	0.219612	-15.6341	4.2678e-55	1.46234e-51
BnaA04G0290300ZS	DAP-147	DAP-24	19.9193	500.642	260.28	-4.65986	0.301263	-15.4677	5.72796e-54	1.79911e-50
BnaC03G0243700ZS	DAP-147	DAP-24	1092.74	17.7677	555.252	5.95948	0.387061	15.3967	1.72161e-53	4.99148e-50
BnaC05G0437900ZS	DAP-147	DAP-24	35.1849	601.833	318.509	-4.10162	0.269542	-15.217	2.7275e-52	7.06599e-49
BnaA07G0054200ZS	DAP-147	DAP-24	238.775	1841.61	1040.19	-2.94788	0.193748	-15.215	2.81207e-52	7.06599e-49
BnaA07G0148100ZS	DAP-147	DAP-24	323.167	2686.08	1504.62	-3.05549	0.20156	-15.1592	6.58896e-52	1.55215e-48
BnaC03G0810100ZS	DAP-147	DAP-24	6.49924	267.848	137.174	-5.37651	0.35825	-15.0077	6.53711e-51	1.44935e-47
BnaC08G0147100ZS	DAP-147	DAP-24	6.40703	355.539	180.973	-5.81771	0.38996	-14.9187	2.4901e-50	5.21413e-47
BnaA08G0161600ZS	DAP-147	DAP-24	480.822	5246.91	2863.87	-3.44831	0.233952	-14.7394	3.60086e-49	7.14316e-46
BnaC03G0097800ZS	DAP-147	DAP-24	79.8215	386.761	233.291	-2.27871	0.15468	-14.7318	4.02824e-49	7.49753e-46
BnaC01G0367700ZS	DAP-147	DAP-24	2651.43	1.22541	1326.33	11.0216	0.748278	14.7293	4.17734e-49	7.49753e-46
BnaA08G0102300ZS	DAP-147	DAP-24	17.1966	887.407	452.302	-5.69852	0.387144	-14.7194	4.84198e-49	8.29542e-46
BnaC04G0608500ZS	DAP-147	DAP-24	31.631	372.873	202.252	-3.56485	0.247036	-14.4305	3.32682e-47	5.45179e-44
BnaA05G0178700ZS	DAP-147	DAP-24	14.3407	514.485	264.413	-5.15814	0.358919	-14.3713	7.83055e-47	1.22976e-43
BnaA10G0230300ZS	DAP-147	DAP-24	624.366	112.786	368.576	2.46603	0.174734	14.1131	3.15389e-45	4.75494e-42
BnaC08G0225700ZS	DAP-147	DAP-24	1489.64	143.092	816.364	3.37869	0.241347	13.9993	1.57393e-44	2.28166e-41
BnaA09G0129500ZS	DAP-147	DAP-24	14.5646	314.79	164.678	-4.44328	0.318922	-13.9322	4.03895e-44	5.63822e-41
BnaC02G0071800ZS	DAP-147	DAP-24	2083.19	21.1738	1052.18	6.62658	0.489582	13.5352	9.69506e-42	1.30506e-38
BnaA09G0006300ZS	DAP-147	DAP-24	69.585	596.453	333.019	-3.09812	0.23116	-13.4025	5.84573e-41	7.59764e-38
BnaC08G0024800ZS	DAP-147	DAP-24	502.752	3969.33	2236.04	-2.98142	0.223685	-13.3287	1.57709e-40	1.9814e-37
BnaA03G0165600ZS	DAP-147	DAP-24	1748.62	9622.29	5685.45	-2.46015	0.184739	-13.3169	1.84556e-40	2.2439e-37
BnaA09G0388300ZS	DAP-147	DAP-24	37.0264	362.846	199.936	-3.29455	0.247889	-13.2905	2.62951e-40	3.09715e-37
BnaC02G0186200ZS	DAP-147	DAP-24	309.986	8.20183	159.094	5.22812	0.399032	13.102	3.20659e-39	3.66241e-36
BnaC07G0297500ZS	DAP-147	DAP-24	8.0132	593.809	300.911	-6.22964	0.475642	-13.0973	3.41059e-39	3.78084e-36
BnaC05G0447600ZS	DAP-147	DAP-24	10.4628	171.437	90.9498	-4.04099	0.308715	-13.0897	3.77141e-39	4.06138e-36
BnaC04G0125000ZS	DAP-147	DAP-24	1100.44	13690.4	7395.44	-3.63714	0.278326	-13.0679	5.02437e-39	5.26037e-36
BnaA08G0006500ZS	DAP-147	DAP-24	3.45879	146.347	74.9031	-5.42389	0.416922	-13.0093	1.0826e-38	1.10282e-35
BnaC03G0258400ZS	DAP-147	DAP-24	49.4005	1352.3	700.849	-4.7765	0.36823	-12.9715	1.7753e-38	1.76087e-35
BnaA08G0018800ZS	DAP-147	DAP-24	115.64	1584.97	850.303	-3.7773	0.291397	-12.9627	1.99074e-38	1.92392e-35
BnaA08G0131100ZS	DAP-147	DAP-24	116.153	559.728	337.941	-2.26658	0.175117	-12.9432	2.56579e-38	2.41768e-35
BnaC04G0532900ZS	DAP-147	DAP-24	4203.75	18755.7	11479.7	-2.15755	0.168038	-12.8397	9.8261e-38	9.03306e-35
BnaC08G0349200ZS	DAP-147	DAP-24	443.154	2141.34	1292.25	-2.27296	0.179414	-12.6688	8.80512e-37	7.90175e-34
BnaC03G0191900ZS	DAP-147	DAP-24	2303.92	7494.03	4898.98	-1.70154	0.134529	-12.6481	1.14557e-36	1.00414e-33
BnaA09G0459300ZS	DAP-147	DAP-24	2.13045	318.025	160.078	-7.25028	0.576112	-12.5848	2.55864e-36	2.19177e-33
BnaC04G0586700ZS	DAP-147	DAP-24	23.6334	172.181	97.9074	-2.87252	0.228447	-12.5741	2.92986e-36	2.45399e-33
BnaC05G0197700ZS	DAP-147	DAP-24	5.48221	146.196	75.8393	-4.74007	0.377256	-12.5646	3.30562e-36	2.70852e-33
BnaA01G0298400ZS	DAP-147	DAP-24	1516.25	0.948736	758.601	10.6285	0.850506	12.4967	7.77928e-36	6.23848e-33
BnaC06G0444600ZS	DAP-147	DAP-24	17.014	628.2	322.607	-5.2001	0.417519	-12.4548	1.31764e-35	1.03465e-32
BnaA05G0178600ZS	DAP-147	DAP-24	9.66179	271.148	140.405	-4.80041	0.385903	-12.4394	1.59628e-35	1.20488e-32
BnaA05G0399100ZS	DAP-147	DAP-24	18.0706	419.07	218.57	-4.54291	0.365206	-12.4393	1.59837e-35	1.20488e-32
BnaA02G0338000ZS	DAP-147	DAP-24	50.2235	1261.15	655.687	-4.65373	0.374643	-12.4218	1.99109e-35	1.47149e-32
BnaA06G0381100ZS	DAP-147	DAP-24	133.806	1987.38	1060.59	-3.89372	0.315861	-12.3273	6.45494e-35	4.67871e-32
BnaC01G0265300ZS	DAP-147	DAP-24	230.762	982.303	606.532	-2.09008	0.169692	-12.3169	7.3468e-35	5.22469e-32
BnaC07G0112300ZS	DAP-147	DAP-24	222.335	33.4418	127.889	2.73919	0.222861	12.291	1.01183e-34	7.0624e-32
BnaC07G0188700ZS	DAP-147	DAP-24	27.6128	313.766	170.689	-3.51251	0.287322	-12.225	2.28543e-34	1.56619e-31
BnaC02G0454300ZS	DAP-147	DAP-24	4.76139	790.289	397.525	-7.40192	0.605612	-12.2222	2.36561e-34	1.59218e-31
BnaA05G0100800ZS	DAP-147	DAP-24	1185.94	6636.49	3911.21	-2.48419	0.203352	-12.2162	2.54592e-34	1.68348e-31
BnaC08G0081200ZS	DAP-147	DAP-24	546.012	4010.77	2278.39	-2.8772	0.236348	-12.1736	4.29792e-34	2.79298e-31
BnaA05G0393600ZS	DAP-147	DAP-24	613.722	3131.01	1872.37	-2.35097	0.193526	-12.1481	5.8717e-34	3.75102e-31
BnaA06G0152300ZS	DAP-147	DAP-24	5.94622	1038.24	522.092	-7.46931	0.616723	-12.1113	9.20509e-34	5.78249e-31
BnaA10G0031700ZS	DAP-147	DAP-24	14.4662	166.608	90.5373	-3.53386	0.29319	-12.0531	1.86711e-33	1.15366e-30
BnaC07G0462000ZS	DAP-147	DAP-24	23.2485	195.911	109.58	-3.06832	0.256272	-11.9729	4.9266e-33	2.99498e-30
BnaA05G0376100ZS	DAP-147	DAP-24	9.80475	194.121	101.963	-4.32234	0.363682	-11.8849	1.41721e-32	8.47874e-30
BnaA02G0077800ZS	DAP-147	DAP-24	6.51096	135.068	70.7893	-4.38925	0.370696	-11.8406	2.4084e-32	1.41836e-29
BnaA01G0279800ZS	DAP-147	DAP-24	651.038	2285.69	1468.37	-1.81168	0.153265	-11.8205	3.05729e-32	1.77281e-29
BnaA10G0105600ZS	DAP-147	DAP-24	855.018	6577.67	3716.35	-2.94378	0.249959	-11.7771	5.12445e-32	2.92645e-29
BnaA03G0317500ZS	DAP-147	DAP-24	3.17302	156.53	79.8513	-5.6153	0.477817	-11.752	6.89605e-32	3.87939e-29
BnaA03G0484900ZS	DAP-147	DAP-24	1.4133	220.439	110.926	-7.36968	0.629925	-11.6993	1.28513e-31	7.12321e-29
BnaC04G0158800ZS	DAP-147	DAP-24	986.583	9.27442	497.929	6.76998	0.578968	11.6932	1.38106e-31	7.54396e-29
BnaC04G0246000ZS	DAP-147	DAP-24	0	1261.31	630.655	-13.1472	1.12845	-11.6506	2.27795e-31	1.22655e-28
BnaC08G0408100ZS	DAP-147	DAP-24	97.0304	404.926	250.978	-2.06011	0.177747	-11.5901	4.62446e-31	2.45494e-28
BnaC03G0445900ZS	DAP-147	DAP-24	405.999	4415.93	2410.97	-3.44366	0.297639	-11.5699	5.85412e-31	3.06455e-28
BnaA06G0175800ZS	DAP-147	DAP-24	751.246	4471.72	2611.48	-2.57385	0.222833	-11.5506	7.33214e-31	3.7857e-28
BnaC05G0033200ZS	DAP-147	DAP-24	16.9253	144.483	80.7043	-3.08876	0.271176	-11.3902	4.67731e-30	2.38233e-27
BnaC03G0535400ZS	DAP-147	DAP-24	355.064	1533.44	944.254	-2.111	0.185433	-11.3841	5.01591e-30	2.52073e-27
BnaC08G0439700ZS	DAP-147	DAP-24	413.464	2.85329	208.159	7.17111	0.634551	11.3011	1.296e-29	6.42733e-27
BnaC03G0479400ZS	DAP-147	DAP-24	1470.96	5621	3545.98	-1.93395	0.17147	-11.2787	1.67238e-29	8.1862e-27
BnaA09G0231200ZS	DAP-147	DAP-24	854.147	3611.07	2232.61	-2.08013	0.186131	-11.1757	5.36556e-29	2.59274e-26
BnaC04G0245700ZS	DAP-147	DAP-24	0	987.917	493.959	-12.7946	1.14628	-11.1619	6.26499e-29	2.98903e-26
BnaC03G0658700ZS	DAP-147	DAP-24	11.4862	144.181	77.8338	-3.6633	0.328969	-11.1357	8.40758e-29	3.96113e-26
BnaC03G0566200ZS	DAP-147	DAP-24	1.54529	137.048	69.2968	-6.49716	0.587659	-11.056	2.05009e-28	9.53949e-26
BnaA02G0058500ZS	DAP-147	DAP-24	1.19935	198.144	99.6718	-7.44189	0.67347	-11.0501	2.19046e-28	1.00684e-25
BnaC05G0288500ZS	DAP-147	DAP-24	50.5272	342.064	196.296	-2.7604	0.250149	-11.035	2.58981e-28	1.17605e-25
BnaC05G0440400ZS	DAP-147	DAP-24	638.678	3156.89	1897.79	-2.30532	0.209414	-11.0084	3.48135e-28	1.56209e-25
BnaA06G0055900ZS	DAP-147	DAP-24	22.5392	324.936	173.738	-3.84956	0.351022	-10.9667	5.52351e-28	2.44925e-25
BnaC01G0246600ZS	DAP-147	DAP-24	12.8072	123.992	68.3995	-3.28462	0.301826	-10.8825	1.39692e-27	6.12223e-25
BnaC03G0243500ZS	DAP-147	DAP-24	868.375	4.10702	436.241	7.77184	0.718082	10.8231	2.6767e-27	1.15963e-24
BnaA06G0106800ZS	DAP-147	DAP-24	183.112	1775.45	979.28	-3.27826	0.303648	-10.7962	3.58556e-27	1.53572e-24
BnaC06G0440000ZS	DAP-147	DAP-24	38.5144	170.072	104.293	-2.14846	0.199939	-10.7456	6.21533e-27	2.63216e-24
BnaC07G0401700ZS	DAP-147	DAP-24	48.8113	198.641	123.726	-2.02195	0.188909	-10.7033	9.8234e-27	4.11393e-24
BnaA03G0317300ZS	DAP-147	DAP-24	2.43081	118.378	60.4044	-5.59823	0.525554	-10.6521	1.70539e-26	7.06351e-24
BnaC07G0413500ZS	DAP-147	DAP-24	925.34	38.0468	481.693	4.60624	0.432702	10.6453	1.83374e-26	7.51255e-24
BnaC01G0259200ZS	DAP-147	DAP-24	1.98791	161.608	81.7979	-6.39866	0.601259	-10.6421	1.89803e-26	7.69233e-24
BnaC04G0121700ZS	DAP-147	DAP-24	11.1335	129.026	70.0796	-3.54483	0.333353	-10.6339	2.07293e-26	8.3118e-24
BnaA08G0003600ZS	DAP-147	DAP-24	603.942	2971.18	1787.56	-2.29865	0.216477	-10.6184	2.44629e-26	9.70558e-24
BnaA06G0301600ZS	DAP-147	DAP-24	153.852	633.582	393.717	-2.04243	0.192456	-10.6125	2.60791e-26	1.0239e-23
BnaC06G0421000ZS	DAP-147	DAP-24	29.4368	424.804	227.121	-3.85647	0.364084	-10.5922	3.23742e-26	1.25795e-23
BnaC08G0261600ZS	DAP-147	DAP-24	738.256	183.883	461.069	2.00465	0.189285	10.5907	3.29239e-26	1.26626e-23
BnaC07G0224900ZS	DAP-147	DAP-24	2.6772	95.7533	49.2153	-5.17154	0.488761	-10.5809	3.65373e-26	1.39104e-23
BnaA09G0212500ZS	DAP-147	DAP-24	22.6808	186.065	104.373	-3.04199	0.289568	-10.5052	8.17061e-26	3.07958e-23
BnaA08G0280400ZS	DAP-147	DAP-24	378.174	3691.73	2034.95	-3.28764	0.313535	-10.4857	1.00483e-25	3.74981e-23
BnaC09G0322300ZS	DAP-147	DAP-24	224.636	63.868	144.252	1.8108	0.17348	10.4381	1.66127e-25	6.13871e-23
BnaA01G0203600ZS	DAP-147	DAP-24	260.75	1.87503	131.313	7.09312	0.680767	10.4193	2.02436e-25	7.40778e-23
BnaA01G0210500ZS	DAP-147	DAP-24	279.796	1188.8	734.296	-2.0874	0.200835	-10.3936	2.65132e-25	9.60873e-23
BnaC03G0488000ZS	DAP-147	DAP-24	2.51994	120.169	61.3443	-5.60108	0.539214	-10.3875	2.82661e-25	1.01464e-22
BnaA03G0206700ZS	DAP-147	DAP-24	268.92	8.35389	138.637	4.95847	0.480324	10.3232	5.5362e-25	1.96854e-22
BnaC04G0059000ZS	DAP-147	DAP-24	4.50088	267.364	135.933	-5.91578	0.573286	-10.3191	5.77851e-25	2.03549e-22
BnaC06G0375100ZS	DAP-147	DAP-24	29.7228	144.188	86.9554	-2.28026	0.22121	-10.3081	6.4748e-25	2.25965e-22
BnaC03G0528500ZS	DAP-147	DAP-24	15.2148	225.887	120.551	-3.89116	0.37918	-10.262	1.04483e-24	3.61291e-22
BnaA01G0309400ZS	DAP-147	DAP-24	248.463	3703.4	1975.93	-3.8985	0.381186	-10.2273	1.49656e-24	5.1279e-22
BnaA01G0032400ZS	DAP-147	DAP-24	23.0697	333.146	178.108	-3.85152	0.377468	-10.2036	1.9115e-24	6.49065e-22
BnaA01G0181400ZS	DAP-147	DAP-24	3.1051	114.002	58.5537	-5.22262	0.512683	-10.1869	2.26998e-24	7.63911e-22
BnaC02G0216000ZS	DAP-147	DAP-24	368.608	1710.9	1039.76	-2.21453	0.21769	-10.1729	2.62104e-24	8.74244e-22
BnaA09G0666300ZS	DAP-147	DAP-24	541.069	4071.21	2306.14	-2.91201	0.286376	-10.1685	2.74201e-24	9.06569e-22
BnaA09G0140300ZS	DAP-147	DAP-24	82.8347	303.885	193.36	-1.87529	0.184583	-10.1596	3.00382e-24	9.84495e-22
BnaA05G0399800ZS	DAP-147	DAP-24	31.112	156.703	93.9073	-2.33199	0.229962	-10.1408	3.64218e-24	1.18342e-21
BnaC02G0070800ZS	DAP-147	DAP-24	1.10644	117.167	59.1366	-6.69414	0.660355	-10.1372	3.77842e-24	1.2172e-21
BnaA02G0263300ZS	DAP-147	DAP-24	171.64	23.8972	97.7685	2.8429	0.2805	10.1351	3.86026e-24	1.23303e-21
BnaC04G0477100ZS	DAP-147	DAP-24	260.271	65.0721	162.672	2.00793	0.19876	10.1023	5.39645e-24	1.70922e-21
BnaC04G0084600ZS	DAP-147	DAP-24	5.26806	86.1919	45.73	-4.03405	0.400222	-10.0795	6.80445e-24	2.13722e-21
BnaA03G0345300ZS	DAP-147	DAP-24	0	290.534	145.267	-11.028	1.10005	-10.0249	1.18442e-23	3.68941e-21
BnaC03G0480300ZS	DAP-147	DAP-24	485.243	1855.46	1170.35	-1.93424	0.193468	-9.99774	1.55916e-23	4.8169e-21
BnaC01G0423400ZS	DAP-147	DAP-24	2.00243	196.059	99.0309	-6.66626	0.670634	-9.94024	2.78158e-23	8.52363e-21
BnaA04G0059300ZS	DAP-147	DAP-24	94.0269	287.425	190.726	-1.61082	0.162664	-9.90276	4.04928e-23	1.23082e-20
BnaC09G0099600ZS	DAP-147	DAP-24	773.435	3380.05	2076.74	-2.12798	0.215232	-9.88689	4.74546e-23	1.43089e-20
BnaC05G0394400ZS	DAP-147	DAP-24	3.81945	77.3894	40.6044	-4.35418	0.440957	-9.87438	5.37618e-23	1.6082e-20
BnaC04G0124900ZS	DAP-147	DAP-24	663.72	5433.92	3048.82	-3.0335	0.307679	-9.85929	6.24879e-23	1.85451e-20
BnaA03G0438900ZS	DAP-147	DAP-24	866.141	36.6493	451.395	4.56601	0.464739	9.82488	8.79787e-23	2.59063e-20
BnaC06G0441500ZS	DAP-147	DAP-24	117.094	11.7669	64.4304	3.28481	0.335434	9.79271	1.21003e-22	3.53544e-20
BnaA06G0020800ZS	DAP-147	DAP-24	10.3408	115.6	62.9703	-3.49091	0.35689	-9.78148	1.35217e-22	3.92035e-20
BnaC03G0813100ZS	DAP-147	DAP-24	495.791	3816.5	2156.15	-2.94466	0.301968	-9.75155	1.81677e-22	5.22718e-20
BnaA09G0107500ZS	DAP-147	DAP-24	14.2507	179.948	97.0993	-3.66813	0.376928	-9.73164	2.21002e-22	6.31045e-20
BnaC05G0185400ZS	DAP-147	DAP-24	3.77619	260.04	131.908	-6.13697	0.632559	-9.70182	2.96175e-22	8.39333e-20
BnaA01G0167300ZS	DAP-147	DAP-24	54.5452	370.251	212.398	-2.7651	0.286987	-9.63492	5.69347e-22	1.60144e-19
BnaA06G0003300ZS	DAP-147	DAP-24	140.343	2334.61	1237.48	-4.05721	0.421673	-9.62169	6.47575e-22	1.80798e-19
BnaA10G0220100ZS	DAP-147	DAP-24	436.758	115.435	276.097	1.91548	0.199139	9.61878	6.66177e-22	1.84624e-19
BnaA03G0393800ZS	DAP-147	DAP-24	4.25132	111.885	58.068	-4.73434	0.493313	-9.59704	8.22739e-22	2.26349e-19
BnaA09G0219200ZS	DAP-147	DAP-24	59.6831	320.54	190.112	-2.42784	0.253398	-9.58114	9.59762e-22	2.62133e-19
BnaA03G0324500ZS	DAP-147	DAP-24	118.454	663.374	390.914	-2.48672	0.259699	-9.57538	1.01481e-21	2.75174e-19
BnaA07G0241000ZS	DAP-147	DAP-24	134.783	2.36738	68.5753	5.90392	0.618099	9.55175	1.27529e-21	3.43334e-19
BnaC05G0422200ZS	DAP-147	DAP-24	0.803081	142.728	71.7657	-7.55292	0.790878	-9.55005	1.2964e-21	3.46542e-19
BnaA09G0160400ZS	DAP-147	DAP-24	706.512	5049.67	2878.09	-2.83759	0.298136	-9.51777	1.76934e-21	4.69635e-19
BnaC01G0342600ZS	DAP-147	DAP-24	641.738	2068.45	1355.09	-1.68829	0.177479	-9.51261	1.85942e-21	4.90095e-19
BnaC07G0522700ZS	DAP-147	DAP-24	86.6339	7.38718	47.0105	3.55931	0.374581	9.5021	2.05704e-21	5.38415e-19
BnaA09G0161700ZS	DAP-147	DAP-24	3.19103	333.962	168.577	-6.7411	0.710109	-9.49304	2.24388e-21	5.83271e-19
BnaC09G0177400ZS	DAP-147	DAP-24	421.2	2045.63	1233.41	-2.28036	0.240534	-9.48042	2.53255e-21	6.53797e-19
BnaC04G0207500ZS	DAP-147	DAP-24	10.5077	325.946	168.227	-4.95453	0.525302	-9.43178	4.03187e-21	1.03378e-18
BnaA09G0050800ZS	DAP-147	DAP-24	0.767273	134.336	67.5515	-7.47485	0.792621	-9.43055	4.07933e-21	1.03888e-18
BnaC09G0247200ZS	DAP-147	DAP-24	38.9613	211.82	125.39	-2.44593	0.259561	-9.42332	4.37048e-21	1.10556e-18
BnaC04G0575600ZS	DAP-147	DAP-24	23.8049	116.072	69.9382	-2.28449	0.243812	-9.36989	7.261e-21	1.8245e-18
BnaA06G0072500ZS	DAP-147	DAP-24	160.901	8.75387	84.8276	4.21294	0.450461	9.35251	8.55918e-21	2.13645e-18
BnaA06G0438400ZS	DAP-147	DAP-24	0	129.965	64.9824	-9.86607	1.05791	-9.32596	1.09979e-20	2.72711e-18
BnaC02G0540200ZS	DAP-147	DAP-24	255.37	1610.05	932.71	-2.65706	0.284968	-9.32404	1.11993e-20	2.75892e-18
BnaC03G0417000ZS	DAP-147	DAP-24	0	197.497	98.7484	-10.4707	1.12408	-9.31491	1.22056e-20	2.98728e-18
BnaA09G0028400ZS	DAP-147	DAP-24	692.881	4052.42	2372.65	-2.54807	0.273754	-9.30788	1.30411e-20	3.16845e-18
BnaC01G0037400ZS	DAP-147	DAP-24	18.5124	360.782	189.647	-4.28931	0.460855	-9.30729	1.3114e-20	3.16845e-18
BnaA08G0079100ZS	DAP-147	DAP-24	36.4896	175.483	105.987	-2.26074	0.243054	-9.30138	1.38633e-20	3.32816e-18
BnaA10G0045600ZS	DAP-147	DAP-24	207.634	63.3865	135.51	1.71764	0.184991	9.28499	1.61717e-20	3.85777e-18
BnaA09G0409900ZS	DAP-147	DAP-24	198.51	1455.4	826.957	-2.87509	0.309785	-9.2809	1.68048e-20	3.98359e-18
BnaA05G0392800ZS	DAP-147	DAP-24	0.203407	220.768	110.486	-9.91011	1.06859	-9.27401	1.79277e-20	4.22321e-18
BnaC03G0145200ZS	DAP-147	DAP-24	129.534	13.7505	71.642	3.2568	0.351267	9.27159	1.83392e-20	4.2933e-18
BnaA05G0370000ZS	DAP-147	DAP-24	18.4328	128.768	73.6004	-2.81384	0.304556	-9.23915	2.48458e-20	5.76347e-18
BnaC02G0351500ZS	DAP-147	DAP-24	151.431	410.495	280.963	-1.43712	0.155553	-9.23881	2.49249e-20	5.76347e-18
BnaA05G0020000ZS	DAP-147	DAP-24	3.19761	319.806	161.502	-6.67629	0.724969	-9.20906	3.28981e-20	7.56075e-18
BnaA05G0081400ZS	DAP-147	DAP-24	9.31695	92.352	50.8345	-3.31692	0.36071	-9.19552	3.73175e-20	8.52444e-18
BnaA05G0378800ZS	DAP-147	DAP-24	19.0285	151.855	85.4418	-3.0043	0.327941	-9.16108	5.13816e-20	1.16664e-17
BnaC03G0457600ZS	DAP-147	DAP-24	397.367	0.582857	198.975	9.27814	1.01314	9.15778	5.29781e-20	1.19569e-17
BnaA07G0389200ZS	DAP-147	DAP-24	3.08401	65.9656	34.5248	-4.44316	0.485688	-9.14818	5.79013e-20	1.29902e-17
BnaC03G0059800ZS	DAP-147	DAP-24	55.4485	169.746	112.597	-1.61476	0.176626	-9.14226	6.11581e-20	1.36397e-17
BnaC04G0594800ZS	DAP-147	DAP-24	20.4895	103.617	62.0531	-2.34587	0.257292	-9.11755	7.68418e-20	1.69763e-17
BnaC09G0271100ZS	DAP-147	DAP-24	758.332	3742.25	2250.29	-2.30316	0.252615	-9.1173	7.70196e-20	1.69763e-17
BnaC09G0080900ZS	DAP-147	DAP-24	42.1244	342.912	192.518	-3.02485	0.331937	-9.11272	8.03391e-20	1.7605e-17
BnaC04G0199700ZS	DAP-147	DAP-24	111.322	10.8606	61.0911	3.35889	0.368872	9.10584	8.55995e-20	1.86493e-17
BnaC09G0310000ZS	DAP-147	DAP-24	96.1202	516.826	306.473	-2.42791	0.267294	-9.08329	1.05343e-19	2.28189e-17
BnaC05G0005800ZS	DAP-147	DAP-24	5.2793	128.204	66.7418	-4.62434	0.50953	-9.0757	1.1295e-19	2.43268e-17
BnaC04G0578400ZS	DAP-147	DAP-24	127.17	14.0496	70.6096	3.19823	0.352502	9.07294	1.15845e-19	2.48087e-17
BnaA03G0249400ZS	DAP-147	DAP-24	6.11449	98.1726	52.1436	-4.01872	0.443448	-9.06245	1.27556e-19	2.71622e-17
BnaA04G0245500ZS	DAP-147	DAP-24	302.718	30.3633	166.541	3.32295	0.36673	9.06104	1.29213e-19	2.73604e-17
BnaC08G0020700ZS	DAP-147	DAP-24	6.92057	87.7156	47.3181	-3.67528	0.405814	-9.05657	1.34619e-19	2.83459e-17
BnaA07G0190300ZS	DAP-147	DAP-24	488.154	1618.49	1053.32	-1.7293	0.190963	-9.05568	1.35719e-19	2.84188e-17
BnaC07G0230800ZS	DAP-147	DAP-24	8.69074	127.755	68.2229	-3.86799	0.427495	-9.04804	1.45564e-19	3.03119e-17
BnaA04G0210400ZS	DAP-147	DAP-24	15.3016	202.189	108.745	-3.73313	0.414567	-9.0049	2.1586e-19	4.47032e-17
BnaA07G0088700ZS	DAP-147	DAP-24	1.16751	87.6456	44.4066	-6.26386	0.697473	-8.98079	2.68823e-19	5.53673e-17
BnaC04G0254500ZS	DAP-147	DAP-24	171.382	457.513	314.448	-1.41798	0.158026	-8.97309	2.88315e-19	5.90592e-17
BnaC05G0507600ZS	DAP-147	DAP-24	393.714	2783.68	1588.7	-2.82214	0.314789	-8.96517	3.098e-19	6.31171e-17
BnaC04G0350700ZS	DAP-147	DAP-24	199.895	428.564	314.229	-1.10028	0.12278	-8.96139	3.20621e-19	6.49705e-17
BnaA03G0389200ZS	DAP-147	DAP-24	0.813626	142.71	71.7618	-7.5445	0.844274	-8.93609	4.032e-19	8.12674e-17
BnaA02G0346600ZS	DAP-147	DAP-24	290.94	1068.87	679.904	-1.87771	0.21029	-8.92912	4.29423e-19	8.60924e-17
BnaA10G0072200ZS	DAP-147	DAP-24	131.83	32.7409	82.2856	2.00512	0.224707	8.92328	4.52696e-19	9.02781e-17
BnaC03G0780700ZS	DAP-147	DAP-24	31.3002	141.211	86.2557	-2.16889	0.243147	-8.92006	4.66036e-19	9.24493e-17
BnaA10G0182200ZS	DAP-147	DAP-24	19.5542	143.458	81.5063	-2.88394	0.323494	-8.91497	4.87957e-19	9.6291e-17
BnaC03G0587900ZS	DAP-147	DAP-24	103.036	417.218	260.127	-2.01958	0.22657	-8.91369	4.93611e-19	9.68994e-17
BnaA02G0212500ZS	DAP-147	DAP-24	0	142.68	71.3402	-10.0057	1.12283	-8.91112	5.05209e-19	9.86624e-17
BnaC08G0482400ZS	DAP-147	DAP-24	123.134	1788.61	955.871	-3.86187	0.433889	-8.90059	5.55491e-19	1.07923e-16
BnaA08G0057800ZS	DAP-147	DAP-24	862.498	6115.18	3488.84	-2.82592	0.317906	-8.88916	6.15721e-19	1.19011e-16
BnaC05G0140200ZS	DAP-147	DAP-24	254.298	30.4368	142.368	3.06906	0.345827	8.87455	7.02177e-19	1.35029e-16
BnaC09G0154000ZS	DAP-147	DAP-24	95.3592	296.105	195.732	-1.63328	0.184404	-8.85709	8.213e-19	1.57135e-16
BnaA01G0146300ZS	DAP-147	DAP-24	129.257	617.408	373.333	-2.25639	0.255826	-8.82002	1.1444e-18	2.17847e-16
BnaA08G0246600ZS	DAP-147	DAP-24	322.216	72.928	197.572	2.14133	0.243801	8.78309	1.59045e-18	3.01235e-16
BnaC03G0670700ZS	DAP-147	DAP-24	124.843	1640.03	882.438	-3.71689	0.42388	-8.76875	1.80665e-18	3.40472e-16
BnaC04G0560400ZS	DAP-147	DAP-24	202.399	21.1691	111.784	3.26054	0.372078	8.76306	1.90028e-18	3.56336e-16
BnaC05G0262600ZS	DAP-147	DAP-24	234.251	1469.95	852.103	-2.6503	0.302566	-8.75942	1.96265e-18	3.6621e-16
BnaC02G0169300ZS	DAP-147	DAP-24	71.5988	816.989	444.294	-3.51376	0.401799	-8.74506	2.22901e-18	4.13861e-16
BnaC07G0137700ZS	DAP-147	DAP-24	0.599675	135.859	68.2292	-7.89746	0.905169	-8.72485	2.66525e-18	4.91132e-16
BnaC06G0090200ZS	DAP-147	DAP-24	176.518	2206.71	1191.62	-3.64499	0.417783	-8.7246	2.67125e-18	4.91132e-16
BnaC05G0408500ZS	DAP-147	DAP-24	12.2399	77.7895	45.0147	-2.67931	0.307375	-8.71675	2.86303e-18	5.23837e-16
BnaA10G0264100ZS	DAP-147	DAP-24	88.2249	266.474	177.349	-1.59494	0.182986	-8.71619	2.87714e-18	5.23876e-16
BnaA03G0384500ZS	DAP-147	DAP-24	150.936	1.59129	76.2636	6.56492	0.753747	8.70972	3.04639e-18	5.52027e-16
BnaA09G0247900ZS	DAP-147	DAP-24	121.877	23.4473	72.6619	2.3841	0.273972	8.70196	3.26188e-18	5.88247e-16
BnaA03G0562300ZS	DAP-147	DAP-24	0	93.5459	46.7729	-9.39259	1.08276	-8.67465	4.14826e-18	7.44533e-16
BnaA04G0258100ZS	DAP-147	DAP-24	5.62949	62.2589	33.9442	-3.46821	0.400452	-8.66072	4.68798e-18	8.37415e-16
BnaA02G0180900ZS	DAP-147	DAP-24	105.496	21.587	63.5413	2.29815	0.265548	8.65438	4.95619e-18	8.8115e-16
BnaC07G0148100ZS	DAP-147	DAP-24	37.7973	208.489	123.143	-2.46279	0.284733	-8.64946	5.17424e-18	9.14373e-16
BnaC07G0310100ZS	DAP-147	DAP-24	50.5854	415.513	233.049	-3.04096	0.351594	-8.64908	5.19158e-18	9.14373e-16
BnaC03G0308200ZS	DAP-147	DAP-24	38.4006	148.28	93.3406	-1.94817	0.225532	-8.6381	5.71567e-18	1.002e-15
BnaC05G0163000ZS	DAP-147	DAP-24	11.1288	69.1856	40.1572	-2.63854	0.305974	-8.62344	6.49718e-18	1.13373e-15
BnaC06G0070500ZS	DAP-147	DAP-24	77.1765	6.65542	41.916	3.5274	0.409284	8.61846	6.7858e-18	1.17366e-15
BnaC03G0233800ZS	DAP-147	DAP-24	1.01703	94.4699	47.7435	-6.62621	0.768842	-8.61842	6.78832e-18	1.17366e-15
BnaC07G0461300ZS	DAP-147	DAP-24	30.5234	212.44	121.482	-2.80312	0.325313	-8.61669	6.89203e-18	1.18615e-15
BnaC07G0115400ZS	DAP-147	DAP-24	21.3275	89.4041	55.3658	-2.06613	0.240162	-8.60308	7.76072e-18	1.32959e-15
BnaC05G0090200ZS	DAP-147	DAP-24	147.978	8.77576	78.3771	4.08876	0.475601	8.59706	8.17875e-18	1.39487e-15
BnaA04G0155800ZS	DAP-147	DAP-24	1.37092	85.2332	43.302	-5.99632	0.697938	-8.59148	8.58592e-18	1.45771e-15
BnaC01G0231600ZS	DAP-147	DAP-24	7.14557	380.997	194.071	-5.75277	0.670371	-8.58147	9.36675e-18	1.58315e-15
BnaA02G0146000ZS	DAP-147	DAP-24	209.315	5.74394	107.529	5.18689	0.604609	8.57892	9.57666e-18	1.6114e-15
BnaA10G0019900ZS	DAP-147	DAP-24	61.7114	467.512	264.612	-2.92379	0.341122	-8.57109	1.02509e-17	1.71719e-15
BnaA02G0062100ZS	DAP-147	DAP-24	2335.08	41.3142	1188.2	5.8148	0.678957	8.56431	1.08722e-17	1.81321e-15
BnaC04G0381200ZS	DAP-147	DAP-24	1515.67	8603.04	5059.35	-2.50502	0.292715	-8.55786	1.14979e-17	1.90911e-15
BnaC04G0520500ZS	DAP-147	DAP-24	50.7558	204.628	127.692	-2.00836	0.234702	-8.55705	1.1579e-17	1.91414e-15
BnaC08G0380900ZS	DAP-147	DAP-24	0	72.3651	36.1825	-9.02313	1.05677	-8.53837	1.36126e-17	2.24049e-15
BnaA03G0373800ZS	DAP-147	DAP-24	267.608	0.582857	134.095	8.70837	1.02005	8.53722	1.37493e-17	2.25315e-15
BnaC02G0509000ZS	DAP-147	DAP-24	0	80.121	40.0605	-9.16776	1.07397	-8.53633	1.38546e-17	2.26059e-15
BnaC03G0477200ZS	DAP-147	DAP-24	1.17409	73.6708	37.4225	-6.01212	0.704769	-8.53062	1.4556e-17	2.36478e-15
BnaC05G0418200ZS	DAP-147	DAP-24	28.2485	122.306	75.2771	-2.11935	0.248463	-8.52981	1.46586e-17	2.37123e-15
BnaA06G0417900ZS	DAP-147	DAP-24	73.3201	242.198	157.759	-1.72094	0.20194	-8.52207	1.56728e-17	2.52445e-15
BnaA03G0331700ZS	DAP-147	DAP-24	51.1873	168.428	109.807	-1.72062	0.202034	-8.51645	1.64519e-17	2.63868e-15
BnaC06G0421700ZS	DAP-147	DAP-24	2.33783	59.2879	30.8129	-4.70173	0.552186	-8.51477	1.66928e-17	2.66597e-15
BnaA03G0429500ZS	DAP-147	DAP-24	4.73603	77.2402	40.9881	-4.02556	0.474129	-8.49044	2.05864e-17	3.27394e-15
BnaC02G0067600ZS	DAP-147	DAP-24	1.00649	105.968	53.4872	-6.79244	0.800121	-8.48926	2.07958e-17	3.29334e-15
BnaC05G0035400ZS	DAP-147	DAP-24	140.952	496.27	318.611	-1.81585	0.213922	-8.48839	2.09528e-17	3.30431e-15
BnaA09G0559900ZS	DAP-147	DAP-24	101.419	383.15	242.284	-1.91851	0.226115	-8.48466	2.16351e-17	3.3977e-15
BnaC08G0141900ZS	DAP-147	DAP-24	91.678	12.8402	52.2591	2.84216	0.335298	8.4765	2.32079e-17	3.62957e-15
BnaA04G0241900ZS	DAP-147	DAP-24	73.497	209.77	141.633	-1.51258	0.178536	-8.4721	2.41003e-17	3.75358e-15
BnaC09G0498800ZS	DAP-147	DAP-24	141.373	21.3193	81.3462	2.7173	0.321075	8.46314	2.60265e-17	4.03689e-15
BnaC01G0401600ZS	DAP-147	DAP-24	119.136	402.6	260.868	-1.75888	0.208675	-8.42878	3.49293e-17	5.39558e-15
BnaC05G0302000ZS	DAP-147	DAP-24	4.27261	60.9899	32.6313	-3.86354	0.458713	-8.42257	3.68325e-17	5.66634e-15
BnaA05G0453300ZS	DAP-147	DAP-24	0.803081	77.0838	38.9434	-6.6694	0.792596	-8.41463	3.9414e-17	6.03883e-15
BnaA09G0501900ZS	DAP-147	DAP-24	118.036	488.074	303.055	-2.04892	0.243702	-8.40749	4.18893e-17	6.3921e-15
BnaA08G0309500ZS	DAP-147	DAP-24	20.1525	132.295	76.2239	-2.72129	0.32393	-8.40087	4.43177e-17	6.7354e-15
BnaA10G0269200ZS	DAP-147	DAP-24	42.9558	270.389	156.672	-2.65725	0.316613	-8.39275	4.74887e-17	7.18834e-15
BnaC07G0454300ZS	DAP-147	DAP-24	1.00649	61.8184	31.4124	-6.02378	0.718633	-8.38227	5.19166e-17	7.82716e-15
BnaA08G0085100ZS	DAP-147	DAP-24	145.803	729.968	437.885	-2.32502	0.277552	-8.37688	5.43512e-17	8.16156e-15
BnaC03G0526600ZS	DAP-147	DAP-24	1.12096	54.6789	27.8999	-5.59482	0.668282	-8.37195	5.6672e-17	8.47629e-15
BnaC04G0069800ZS	DAP-147	DAP-24	149.285	8.20945	78.7475	4.1772	0.499479	8.36311	6.10864e-17	9.10043e-15
BnaC09G0099400ZS	DAP-147	DAP-24	1.34188	75.1007	38.2213	-5.82799	0.697243	-8.35863	6.34532e-17	9.41581e-15
BnaC05G0472400ZS	DAP-147	DAP-24	158.727	476.685	317.706	-1.58798	0.190153	-8.35107	6.76468e-17	9.98022e-15
BnaC07G0412300ZS	DAP-147	DAP-24	10.8899	501.202	256.046	-5.53492	0.662799	-8.35083	6.77864e-17	9.98022e-15
BnaC03G0457300ZS	DAP-147	DAP-24	245.306	0	122.653	10.0192	1.20015	8.34833	6.92327e-17	1.01535e-14
BnaC07G0308900ZS	DAP-147	DAP-24	240.368	3783.11	2011.74	-3.97677	0.476594	-8.34414	7.17356e-17	1.04798e-14
BnaA09G0069900ZS	DAP-147	DAP-24	315.16	12.982	164.071	4.60909	0.552426	8.34337	7.22046e-17	1.05076e-14
BnaC05G0378800ZS	DAP-147	DAP-24	19.4944	145.692	82.5932	-2.90161	0.348146	-8.33448	7.78386e-17	1.12839e-14
BnaC05G0455300ZS	DAP-147	DAP-24	94.5545	6.67078	50.6127	3.82199	0.459676	8.31454	9.21123e-17	1.33019e-14
BnaA09G0036400ZS	DAP-147	DAP-24	306.928	1161.92	734.422	-1.92059	0.231425	-8.29898	1.05007e-16	1.51061e-14
BnaC04G0266800ZS	DAP-147	DAP-24	434.81	2564.17	1499.49	-2.56044	0.30921	-8.28058	1.22575e-16	1.75664e-14
BnaC03G0533200ZS	DAP-147	DAP-24	13.6391	101.072	57.3555	-2.89734	0.350193	-8.27356	1.30018e-16	1.85626e-14
BnaC09G0222000ZS	DAP-147	DAP-24	0	72.3456	36.1728	-9.02624	1.09126	-8.27142	1.32376e-16	1.88279e-14
BnaC03G0443800ZS	DAP-147	DAP-24	2.31674	49.7891	26.0529	-4.44759	0.537791	-8.27012	1.33825e-16	1.89625e-14
BnaC09G0536000ZS	DAP-147	DAP-24	555.224	233.14	394.182	1.25425	0.151743	8.26558	1.39022e-16	1.9625e-14
BnaC08G0094700ZS	DAP-147	DAP-24	141.818	391.954	266.886	-1.46765	0.178095	-8.24082	1.71032e-16	2.40536e-14
BnaA04G0258300ZS	DAP-147	DAP-24	35.9018	131.167	83.5344	-1.86817	0.226865	-8.2347	1.80003e-16	2.52211e-14
BnaA03G0365400ZS	DAP-147	DAP-24	384.907	3944.19	2164.55	-3.35753	0.408406	-8.22106	2.01706e-16	2.81575e-14
BnaC05G0333100ZS	DAP-147	DAP-24	0	60.7228	30.3614	-8.77377	1.06775	-8.21703	2.08602e-16	2.90126e-14
BnaC04G0471200ZS	DAP-147	DAP-24	9.26942	58.7699	34.0197	-2.66701	0.325476	-8.19419	2.52291e-16	3.49599e-14
BnaA06G0437200ZS	DAP-147	DAP-24	15.3346	111.554	63.444	-2.86723	0.350289	-8.18533	2.71562e-16	3.74924e-14
BnaA06G0071200ZS	DAP-147	DAP-24	3.66617	82.6957	43.1809	-4.50896	0.551138	-8.18117	2.81099e-16	3.86676e-14
BnaC01G0254500ZS	DAP-147	DAP-24	176.485	0.889043	88.6868	7.53532	0.921717	8.1753	2.95131e-16	4.04501e-14
BnaA05G0472300ZS	DAP-147	DAP-24	0.396268	209.162	104.779	-9.11093	1.11702	-8.15647	3.44956e-16	4.7107e-14
BnaC05G0367400ZS	DAP-147	DAP-24	69.6107	4.26615	36.9384	3.9745	0.487308	8.15604	3.462e-16	4.7107e-14
BnaC05G0062400ZS	DAP-147	DAP-24	278.308	972.134	625.221	-1.80504	0.221342	-8.155	3.49192e-16	4.73431e-14
BnaC08G0232100ZS	DAP-147	DAP-24	75.9719	275.385	175.678	-1.85538	0.228328	-8.12594	4.43893e-16	5.99669e-14
BnaA10G0205300ZS	DAP-147	DAP-24	583.359	9.24227	296.301	5.956	0.733406	8.12101	4.62309e-16	6.22318e-14
BnaA06G0202700ZS	DAP-147	DAP-24	173.072	620.149	396.61	-1.84212	0.226902	-8.11856	4.71731e-16	6.3274e-14
BnaA06G0291500ZS	DAP-147	DAP-24	254.698	831.115	542.906	-1.70655	0.210277	-8.11571	4.82969e-16	6.44105e-14
BnaA04G0080400ZS	DAP-147	DAP-24	755.507	3187.32	1971.41	-2.07691	0.255918	-8.11554	4.83621e-16	6.44105e-14
BnaC05G0053000ZS	DAP-147	DAP-24	86.2915	301.198	193.745	-1.80423	0.222628	-8.10424	5.30743e-16	7.04374e-14
BnaC06G0297700ZS	DAP-147	DAP-24	6.21745	51.162	28.6897	-3.04122	0.375613	-8.0967	5.64704e-16	7.45949e-14
BnaC05G0521700ZS	DAP-147	DAP-24	0.406813	126.949	63.6779	-8.39296	1.03663	-8.09641	5.66027e-16	7.45949e-14
BnaC07G0213800ZS	DAP-147	DAP-24	391.136	4086.6	2238.87	-3.38551	0.418774	-8.08435	6.24978e-16	8.20768e-14
BnaA09G0620900ZS	DAP-147	DAP-24	178.852	0.343441	89.5979	8.8429	1.09468	8.07806	6.58027e-16	8.61171e-14
BnaC07G0227200ZS	DAP-147	DAP-24	20.8417	90.7814	55.8116	-2.12177	0.262807	-8.07347	6.83259e-16	8.91097e-14
BnaC09G0574500ZS	DAP-147	DAP-24	7.7311	54.9452	31.3382	-2.8261	0.350348	-8.06657	7.22997e-16	9.39672e-14
BnaA09G0714600ZS	DAP-147	DAP-24	7.14924	117.025	62.0873	-4.04262	0.501363	-8.06326	7.42854e-16	9.62162e-14
BnaC04G0529400ZS	DAP-147	DAP-24	338.79	927.826	633.308	-1.45351	0.18062	-8.04734	8.46096e-16	1.09213e-13
BnaC06G0392400ZS	DAP-147	DAP-24	1262.91	5573.7	3418.31	-2.14193	0.266287	-8.04368	8.71776e-16	1.12144e-13
BnaA07G0194700ZS	DAP-147	DAP-24	187.817	37.2984	112.558	2.32783	0.289596	8.03817	9.11912e-16	1.16908e-13
BnaA08G0011700ZS	DAP-147	DAP-24	88.5972	15.3192	51.9582	2.55127	0.317449	8.03678	9.22297e-16	1.17838e-13
BnaA07G0278800ZS	DAP-147	DAP-24	407.567	1504.4	955.985	-1.88449	0.234667	-8.03046	9.71087e-16	1.23653e-13
BnaC08G0111900ZS	DAP-147	DAP-24	50.9482	201.302	126.125	-1.97967	0.246563	-8.02906	9.82213e-16	1.24648e-13
BnaC02G0320100ZS	DAP-147	DAP-24	98.3904	23.109	60.7497	2.10619	0.262454	8.02497	1.01554e-15	1.28445e-13
BnaA07G0105100ZS	DAP-147	DAP-24	115.91	0	57.9549	8.93874	1.11404	8.02372	1.02592e-15	1.29324e-13
BnaA04G0010100ZS	DAP-147	DAP-24	454.368	3399.36	1926.86	-2.90364	0.36222	-8.01624	1.09033e-15	1.36986e-13
BnaA05G0401900ZS	DAP-147	DAP-24	57.9808	205.331	131.656	-1.82652	0.228099	-8.0076	1.16973e-15	1.46473e-13
BnaC07G0231000ZS	DAP-147	DAP-24	7.8982	134.599	71.2486	-4.07977	0.509983	-7.99981	1.24612e-15	1.55522e-13
BnaA03G0258900ZS	DAP-147	DAP-24	38.8343	137.837	88.3354	-1.82536	0.228509	-7.98812	1.37012e-15	1.70433e-13
BnaC08G0161100ZS	DAP-147	DAP-24	127.737	371.214	249.476	-1.53913	0.192694	-7.98744	1.37766e-15	1.70807e-13
BnaC08G0446900ZS	DAP-147	DAP-24	0.61022	113.061	56.8357	-7.62835	0.956237	-7.97747	1.49368e-15	1.84584e-13
BnaA06G0293200ZS	DAP-147	DAP-24	21.6958	111.915	66.8053	-2.36658	0.296718	-7.97586	1.51321e-15	1.86386e-13
BnaA09G0625000ZS	DAP-147	DAP-24	205.881	2199.52	1202.7	-3.41801	0.428907	-7.96912	1.59812e-15	1.96204e-13
BnaC04G0060400ZS	DAP-147	DAP-24	221.506	8.57087	115.038	4.65049	0.584077	7.96211	1.69124e-15	2.06963e-13
BnaC04G0612900ZS	DAP-147	DAP-24	113.408	864.311	488.859	-2.93093	0.368237	-7.95934	1.72965e-15	2.10978e-13
BnaA09G0534000ZS	DAP-147	DAP-24	0	53.2686	26.6343	-8.58528	1.08258	-7.93041	2.1843e-15	2.65575e-13
BnaC05G0448700ZS	DAP-147	DAP-24	60.418	206.785	133.602	-1.77146	0.223561	-7.92382	2.30325e-15	2.79138e-13
BnaA05G0408200ZS	DAP-147	DAP-24	9.26322	62.8871	36.0751	-2.76482	0.349212	-7.91731	2.42704e-15	2.93197e-13
BnaA06G0179500ZS	DAP-147	DAP-24	2.38068	57.3226	29.8516	-4.56332	0.577067	-7.90778	2.6201e-15	3.15508e-13
BnaC04G0030300ZS	DAP-147	DAP-24	7.12795	60.6096	33.8688	-3.10681	0.393222	-7.90091	2.76883e-15	3.32357e-13
BnaC09G0058800ZS	DAP-147	DAP-24	897.818	257.536	577.677	1.80124	0.228066	7.89788	2.83693e-15	3.3945e-13
BnaC02G0031100ZS	DAP-147	DAP-24	8.1743	66.3454	37.2598	-3.0233	0.382822	-7.89742	2.84744e-15	3.39629e-13
BnaC08G0029300ZS	DAP-147	DAP-24	74.8523	11.8934	43.3728	2.63335	0.333892	7.88684	3.09945e-15	3.68522e-13
BnaA02G0062500ZS	DAP-147	DAP-24	2.39473	94.5701	48.4824	-5.34765	0.678816	-7.87791	3.32894e-15	3.94563e-13
BnaA04G0108200ZS	DAP-147	DAP-24	8.48136	73.4595	40.9704	-3.12912	0.39804	-7.86132	3.80095e-15	4.49096e-13
BnaA05G0391400ZS	DAP-147	DAP-24	32.9044	332.881	182.893	-3.34302	0.425366	-7.85917	3.8668e-15	4.55449e-13
BnaC09G0057300ZS	DAP-147	DAP-24	30.5775	355.914	193.246	-3.54463	0.451292	-7.8544	4.01685e-15	4.71648e-13
BnaC05G0377200ZS	DAP-147	DAP-24	157.558	1183.27	670.413	-2.90977	0.371019	-7.84263	4.41205e-15	5.16443e-13
BnaC04G0381100ZS	DAP-147	DAP-24	1503.07	11076.8	6289.93	-2.88165	0.367754	-7.83581	4.65845e-15	5.43597e-13
BnaC08G0121200ZS	DAP-147	DAP-24	533.669	2298.93	1416.3	-2.10704	0.268955	-7.83418	4.71916e-15	5.48981e-13
BnaA08G0292600ZS	DAP-147	DAP-24	0.960134	70.6367	35.7984	-6.2206	0.794211	-7.83243	4.78544e-15	5.5418e-13
BnaC05G0414400ZS	DAP-147	DAP-24	28.2444	120.375	74.3098	-2.09466	0.267442	-7.83222	4.79326e-15	5.5418e-13
BnaA10G0018500ZS	DAP-147	DAP-24	9.29488	53.6386	31.4667	-2.53083	0.323155	-7.83161	4.81643e-15	5.55156e-13
BnaA04G0000500ZS	DAP-147	DAP-24	170.939	378.637	274.788	-1.14828	0.146678	-7.82858	4.93394e-15	5.66967e-13
BnaA06G0024100ZS	DAP-147	DAP-24	1.93081	592.427	297.179	-8.27156	1.05695	-7.82584	5.04259e-15	5.77691e-13
BnaA01G0378900ZS	DAP-147	DAP-24	28.4242	129.825	79.1245	-2.18939	0.27981	-7.82458	5.09339e-15	5.81742e-13
BnaC04G0347900ZS	DAP-147	DAP-24	68.7018	256.534	162.618	-1.90337	0.243676	-7.81105	5.67132e-15	6.45793e-13
BnaC02G0165500ZS	DAP-147	DAP-24	19.9363	121.857	70.8964	-2.61664	0.33608	-7.78574	6.93039e-15	7.86787e-13
BnaA05G0444600ZS	DAP-147	DAP-24	431.961	2294.78	1363.37	-2.40961	0.309727	-7.7798	7.26377e-15	8.22159e-13
BnaC03G0395600ZS	DAP-147	DAP-24	3.4946	59.6298	31.5622	-4.11404	0.529296	-7.77267	7.68495e-15	8.67225e-13
BnaC09G0568200ZS	DAP-147	DAP-24	226.637	59.7412	143.189	1.92722	0.248049	7.7695	7.87939e-15	8.86513e-13
BnaC09G0464000ZS	DAP-147	DAP-24	122.634	355.036	238.835	-1.533	0.197334	-7.76856	7.93857e-15	8.90514e-13
BnaC03G0665500ZS	DAP-147	DAP-24	35.6849	301.039	168.362	-3.07986	0.396668	-7.76432	8.20876e-15	9.14465e-13
BnaC08G0335900ZS	DAP-147	DAP-24	16.1693	256.817	136.493	-3.99213	0.514164	-7.76431	8.20918e-15	9.14465e-13
BnaC09G0539300ZS	DAP-147	DAP-24	40.0491	436.845	238.447	-3.44777	0.444068	-7.76407	8.22487e-15	9.14465e-13
BnaC03G0324800ZS	DAP-147	DAP-24	74.2856	1.41287	37.8492	5.55682	0.715773	7.76339	8.26876e-15	9.16641e-13
BnaA06G0326800ZS	DAP-147	DAP-24	323.228	147.07	235.149	1.13978	0.146935	7.75706	8.69213e-15	9.60748e-13
BnaA04G0287900ZS	DAP-147	DAP-24	56.5936	5.00499	30.7993	3.47416	0.448129	7.75259	9.00363e-15	9.92268e-13
BnaC08G0342500ZS	DAP-147	DAP-24	81.2949	314.905	198.1	-1.95507	0.252992	-7.72777	1.09445e-14	1.20265e-12
BnaA01G0195200ZS	DAP-147	DAP-24	53.0315	152.604	102.818	-1.52804	0.19779	-7.72554	1.1138e-14	1.22035e-12
BnaA05G0420500ZS	DAP-147	DAP-24	140.836	498.069	319.453	-1.82328	0.236133	-7.72143	1.15036e-14	1.25676e-12
BnaC02G0075000ZS	DAP-147	DAP-24	306.881	70.4609	188.671	2.11851	0.274544	7.71646	1.19607e-14	1.30292e-12
BnaA03G0546200ZS	DAP-147	DAP-24	60.9072	6.03531	33.4712	3.33043	0.431817	7.71258	1.23299e-14	1.33927e-12
BnaC07G0021100ZS	DAP-147	DAP-24	161.157	61.8988	111.528	1.38424	0.179596	7.70754	1.2827e-14	1.38926e-12
BnaC03G0295500ZS	DAP-147	DAP-24	28.6344	378.493	203.564	-3.72927	0.484298	-7.70036	1.35688e-14	1.46539e-12
BnaA09G0040400ZS	DAP-147	DAP-24	10.4198	100.765	55.5924	-3.27773	0.425718	-7.6993	1.36817e-14	1.47337e-12
BnaC04G0367000ZS	DAP-147	DAP-24	517.051	2909.23	1713.14	-2.49244	0.323857	-7.69613	1.40252e-14	1.50605e-12
BnaA06G0299700ZS	DAP-147	DAP-24	1.3564	42.2701	21.8132	-4.99069	0.648499	-7.69575	1.40663e-14	1.50617e-12
BnaC04G0505000ZS	DAP-147	DAP-24	2.10258	37.7819	19.9423	-4.18128	0.544562	-7.67824	1.61284e-14	1.72208e-12
BnaA05G0153100ZS	DAP-147	DAP-24	504.092	2303.48	1403.79	-2.19209	0.285586	-7.67576	1.64435e-14	1.75077e-12
BnaC09G0246000ZS	DAP-147	DAP-24	203.614	40.592	122.103	2.3281	0.303368	7.67418	1.66476e-14	1.76751e-12
BnaC01G0294800ZS	DAP-147	DAP-24	62.2283	406.293	234.261	-2.70934	0.353067	-7.67375	1.67044e-14	1.76856e-12
BnaC01G0383500ZS	DAP-147	DAP-24	112.26	1195.52	653.89	-3.41392	0.445257	-7.66731	1.75636e-14	1.85431e-12
BnaC01G0140000ZS	DAP-147	DAP-24	23.1017	296.241	159.671	-3.68344	0.480461	-7.66647	1.76791e-14	1.86129e-12
BnaA07G0050000ZS	DAP-147	DAP-24	114.479	3.36099	58.9199	5.13795	0.670605	7.66167	1.83527e-14	1.92682e-12
BnaC05G0226500ZS	DAP-147	DAP-24	67.0134	3.20446	35.1089	4.39167	0.573485	7.65786	1.8906e-14	1.9794e-12
BnaA10G0040700ZS	DAP-147	DAP-24	27.7436	106.071	66.9071	-1.93309	0.252785	-7.64717	2.05445e-14	2.14499e-12
BnaC04G0094300ZS	DAP-147	DAP-24	19.5862	141.395	80.4908	-2.85965	0.373996	-7.64619	2.07016e-14	2.15543e-12
BnaA10G0171200ZS	DAP-147	DAP-24	115.258	11.7331	63.4956	3.3102	0.433574	7.63469	2.26358e-14	2.35032e-12
BnaA03G0239900ZS	DAP-147	DAP-24	101.294	397.632	249.463	-1.97206	0.258375	-7.63253	2.30188e-14	2.38352e-12
BnaA02G0022700ZS	DAP-147	DAP-24	96.0687	2.11445	49.0916	5.44617	0.714219	7.62534	2.43388e-14	2.5133e-12
BnaC04G0162400ZS	DAP-147	DAP-24	144.287	1.0752	72.6813	7.21096	0.94732	7.61196	2.69973e-14	2.7802e-12
BnaC08G0451900ZS	DAP-147	DAP-24	47.9886	208.666	128.327	-2.12266	0.278907	-7.61063	2.72754e-14	2.80119e-12
BnaC07G0157500ZS	DAP-147	DAP-24	157.764	0	78.8819	9.38316	1.23299	7.61009	2.73899e-14	2.80203e-12
BnaA09G0411700ZS	DAP-147	DAP-24	69.7418	0	34.8709	8.20453	1.07814	7.60989	2.74323e-14	2.80203e-12
BnaA09G0212100ZS	DAP-147	DAP-24	143.376	387.464	265.42	-1.43501	0.188765	-7.60209	2.91382e-14	2.96824e-12
BnaA06G0167900ZS	DAP-147	DAP-24	81.8951	271.264	176.579	-1.72846	0.22743	-7.59998	2.96178e-14	3.00896e-12
BnaC06G0141300ZS	DAP-147	DAP-24	699.959	3021.08	1860.52	-2.10993	0.277857	-7.59357	3.11202e-14	3.15309e-12
BnaA09G0242400ZS	DAP-147	DAP-24	194.331	1.44238	97.8866	6.97392	0.919579	7.58381	3.35546e-14	3.39064e-12
BnaC03G0710400ZS	DAP-147	DAP-24	739.576	230.551	485.063	1.68458	0.222285	7.5785	3.4958e-14	3.523e-12
BnaC01G0423300ZS	DAP-147	DAP-24	6.51396	49.1957	27.8549	-2.93041	0.38698	-7.57252	3.66063e-14	3.67927e-12
BnaC02G0544800ZS	DAP-147	DAP-24	6.0991	182.721	94.41	-4.92122	0.65011	-7.56982	3.73735e-14	3.7464e-12
BnaA03G0483500ZS	DAP-147	DAP-24	22.0271	84.5267	53.2769	-1.94661	0.257628	-7.55591	4.15949e-14	4.1585e-12
BnaC03G0089900ZS	DAP-147	DAP-24	14.6393	96.0838	55.3616	-2.71695	0.360933	-7.52758	5.16896e-14	5.15405e-12
BnaA06G0145500ZS	DAP-147	DAP-24	169.081	31.6313	100.356	2.42402	0.322493	7.5165	5.62625e-14	5.59522e-12
BnaA10G0107800ZS	DAP-147	DAP-24	134.628	334.876	234.752	-1.31724	0.175436	-7.50837	5.98684e-14	5.93238e-12
BnaA06G0008600ZS	DAP-147	DAP-24	0	62.1803	31.0902	-8.80184	1.1723	-7.50815	5.99676e-14	5.93238e-12
BnaA01G0287900ZS	DAP-147	DAP-24	24.1567	96.4547	60.3057	-2.00107	0.26707	-7.49269	6.74738e-14	6.65748e-12
BnaA05G0465100ZS	DAP-147	DAP-24	60.3809	9.26221	34.8216	2.70555	0.361233	7.48977	6.89924e-14	6.78953e-12
BnaA10G0018800ZS	DAP-147	DAP-24	23.3194	83.5145	53.4169	-1.84145	0.245951	-7.48703	7.04509e-14	6.91502e-12
BnaA01G0053700ZS	DAP-147	DAP-24	0.406813	98.4883	49.4476	-8.02516	1.07259	-7.48207	7.3162e-14	7.16246e-12
BnaA08G0056800ZS	DAP-147	DAP-24	67.3466	13.4449	40.3957	2.32599	0.310939	7.48054	7.4018e-14	7.20988e-12
BnaA06G0267300ZS	DAP-147	DAP-24	0.203407	62.475	31.3392	-8.09235	1.08179	-7.48052	7.40289e-14	7.20988e-12
BnaC08G0448600ZS	DAP-147	DAP-24	133.303	23.2238	78.2634	2.52012	0.33696	7.479	7.48914e-14	7.27508e-12
BnaA02G0410000ZS	DAP-147	DAP-24	10.9821	209.217	110.1	-4.26347	0.570106	-7.47837	7.52487e-14	7.291e-12
BnaC01G0219600ZS	DAP-147	DAP-24	104.659	228.797	166.728	-1.13057	0.151241	-7.47534	7.70064e-14	7.44218e-12
BnaC03G0691100ZS	DAP-147	DAP-24	0	45.3351	22.6676	-8.34767	1.11725	-7.47161	7.92194e-14	7.63647e-12
BnaA10G0022300ZS	DAP-147	DAP-24	2.81606	205.607	104.211	-6.22128	0.833016	-7.46838	8.11889e-14	7.80635e-12
BnaA06G0008500ZS	DAP-147	DAP-24	0	57.3414	28.6707	-8.6848	1.16303	-7.46737	8.18129e-14	7.84633e-12
BnaC09G0524700ZS	DAP-147	DAP-24	273.83	72.5618	173.196	1.92219	0.257852	7.45463	9.01217e-14	8.62126e-12
BnaA01G0030400ZS	DAP-147	DAP-24	3.92995	40.1576	22.0438	-3.34893	0.449334	-7.45309	9.11818e-14	8.70059e-12
BnaC08G0344200ZS	DAP-147	DAP-24	0.203407	70.5328	35.3681	-8.26209	1.10871	-7.45197	9.19552e-14	8.75223e-12
BnaA01G0191700ZS	DAP-147	DAP-24	0.203407	58.7069	29.4552	-8.00392	1.0744	-7.44969	9.35566e-14	8.88222e-12
BnaA02G0168400ZS	DAP-147	DAP-24	271.09	753.325	512.207	-1.47357	0.197924	-7.44511	9.68619e-14	9.17292e-12
BnaA05G0154500ZS	DAP-147	DAP-24	0.588929	70.913	35.751	-6.95826	0.935182	-7.44054	1.00275e-13	9.47233e-12
BnaC06G0087100ZS	DAP-147	DAP-24	0	41.6656	20.8328	-8.23044	1.10911	-7.42075	1.16463e-13	1.0974e-11
BnaC09G0583100ZS	DAP-147	DAP-24	82.2911	4.51908	43.4051	4.19825	0.565955	7.41799	1.18911e-13	1.11767e-11
BnaC03G0507900ZS	DAP-147	DAP-24	97.1518	13.4751	55.3135	2.85504	0.385503	7.406	1.30167e-13	1.22043e-11
BnaA01G0250300ZS	DAP-147	DAP-24	10.4473	68.5643	39.5058	-2.71319	0.366422	-7.40456	1.31588e-13	1.23069e-11
BnaA04G0100900ZS	DAP-147	DAP-24	1769.07	10660.3	6214.66	-2.59125	0.350033	-7.40288	1.33259e-13	1.24324e-11
BnaA09G0257700ZS	DAP-147	DAP-24	2140.81	8037.74	5089.27	-1.90867	0.257951	-7.39934	1.36863e-13	1.27371e-11
BnaC05G0083800ZS	DAP-147	DAP-24	163.972	46.2455	105.109	1.83066	0.247437	7.39849	1.37739e-13	1.2787e-11
BnaA03G0085400ZS	DAP-147	DAP-24	45.7231	182.871	114.297	-2.00003	0.270562	-7.39212	1.44506e-13	1.33822e-11
BnaA01G0053800ZS	DAP-147	DAP-24	0.585157	59.3965	29.9908	-6.71111	0.908423	-7.38765	1.4945e-13	1.38062e-11
BnaC07G0125200ZS	DAP-147	DAP-24	73.1199	681.001	377.06	-3.22091	0.436005	-7.38732	1.49818e-13	1.38063e-11
BnaA03G0400400ZS	DAP-147	DAP-24	58.7105	1.84552	30.278	4.94512	0.669594	7.38525	1.52173e-13	1.39891e-11
BnaA07G0128300ZS	DAP-147	DAP-24	26.0724	217.431	121.752	-3.06424	0.415021	-7.38333	1.54378e-13	1.41574e-11
BnaC09G0120000ZS	DAP-147	DAP-24	7.67807	54.2849	30.9815	-2.83727	0.384358	-7.38185	1.56108e-13	1.42812e-11
BnaC09G0059900ZS	DAP-147	DAP-24	367.39	16.0311	191.711	4.51417	0.611802	7.37847	1.60114e-13	1.46122e-11
BnaC01G0146100ZS	DAP-147	DAP-24	22.8261	79.2336	51.0299	-1.79133	0.242833	-7.37678	1.62159e-13	1.47508e-11
BnaA06G0004900ZS	DAP-147	DAP-24	0.360459	84.0034	42.182	-7.7954	1.05678	-7.37657	1.62415e-13	1.47508e-11
BnaC09G0509900ZS	DAP-147	DAP-24	0	40.3147	20.1573	-8.17932	1.10931	-7.37332	1.66426e-13	1.50787e-11
BnaA06G0032700ZS	DAP-147	DAP-24	9.28324	115.946	62.6145	-3.63816	0.494589	-7.35593	1.89597e-13	1.71369e-11
BnaA02G0061000ZS	DAP-147	DAP-24	2.05226	52.0321	27.0422	-4.64736	0.631952	-7.35398	1.92393e-13	1.7348e-11
BnaC02G0072300ZS	DAP-147	DAP-24	0.803081	46.1128	23.458	-5.92691	0.806311	-7.35065	1.97243e-13	1.77429e-11
BnaA10G0267200ZS	DAP-147	DAP-24	70.6534	2.58435	36.6189	4.78694	0.651285	7.34999	1.98226e-13	1.77889e-11
BnaC09G0366900ZS	DAP-147	DAP-24	704.895	4566.6	2635.75	-2.69578	0.36691	-7.34726	2.02318e-13	1.8113e-11
BnaA09G0400100ZS	DAP-147	DAP-24	994.115	3313.53	2153.82	-1.7369	0.23672	-7.33733	2.17899e-13	1.94616e-11
BnaA01G0229800ZS	DAP-147	DAP-24	39.0332	282.382	160.708	-2.85875	0.390348	-7.3236	2.41406e-13	2.15103e-11
BnaC02G0485900ZS	DAP-147	DAP-24	11.155	96.4244	53.7897	-3.11752	0.425735	-7.32268	2.43069e-13	2.16073e-11
BnaA09G0675700ZS	DAP-147	DAP-24	856.91	4366.78	2611.85	-2.34956	0.321599	-7.30587	2.75474e-13	2.44304e-11
BnaA08G0199700ZS	DAP-147	DAP-24	134.141	2532.5	1333.32	-4.23972	0.580751	-7.30041	2.8689e-13	2.5383e-11
BnaA09G0651500ZS	DAP-147	DAP-24	0.61022	61.2616	30.9359	-6.74646	0.924302	-7.29897	2.89978e-13	2.55962e-11
BnaA03G0483400ZS	DAP-147	DAP-24	67.8018	430.72	249.261	-2.66865	0.366269	-7.28604	3.19193e-13	2.81091e-11
BnaA06G0084400ZS	DAP-147	DAP-24	0.396268	83.552	41.9742	-7.78864	1.06985	-7.28014	3.3348e-13	2.92988e-11
BnaC03G0348900ZS	DAP-147	DAP-24	290.598	5.68099	148.139	5.62207	0.772845	7.27452	3.47665e-13	3.0474e-11
BnaC05G0273200ZS	DAP-147	DAP-24	1287.78	4558.94	2923.36	-1.82382	0.250779	-7.27264	3.52541e-13	3.0815e-11
BnaC07G0229400ZS	DAP-147	DAP-24	51.8488	144.624	98.2366	-1.47984	0.203487	-7.27239	3.5319e-13	3.0815e-11
BnaC07G0297800ZS	DAP-147	DAP-24	56.0431	167.345	111.694	-1.57839	0.217086	-7.27079	3.57398e-13	3.11102e-11
BnaA03G0219400ZS	DAP-147	DAP-24	10.244	68.6225	39.4332	-2.73881	0.376779	-7.26899	3.62182e-13	3.14539e-11
BnaC08G0153600ZS	DAP-147	DAP-24	15.9276	95.5134	55.7205	-2.59326	0.356851	-7.26707	3.67366e-13	3.18308e-11
BnaC03G0658600ZS	DAP-147	DAP-24	1.71289	40.2704	20.9917	-4.5645	0.628217	-7.26579	3.70862e-13	3.206e-11
BnaA02G0111300ZS	DAP-147	DAP-24	0.974652	56.3802	28.6774	-5.88574	0.810238	-7.26421	3.75231e-13	3.23634e-11
BnaA03G0352400ZS	DAP-147	DAP-24	0	33.761	16.8805	-7.92191	1.09067	-7.26334	3.77653e-13	3.2498e-11
BnaC02G0531800ZS	DAP-147	DAP-24	57.9794	175.551	116.765	-1.59542	0.219703	-7.26172	3.82201e-13	3.28144e-11
BnaC02G0362600ZS	DAP-147	DAP-24	197.442	66.423	131.933	1.57998	0.217727	7.25671	3.96624e-13	3.39754e-11
BnaC05G0386700ZS	DAP-147	DAP-24	0	35.3817	17.6908	-7.98693	1.10104	-7.25401	4.04624e-13	3.4582e-11
BnaC03G0344700ZS	DAP-147	DAP-24	22.3726	83.2916	52.8321	-1.8969	0.261689	-7.24869	4.20813e-13	3.58843e-11
BnaA05G0333100ZS	DAP-147	DAP-24	278.222	0	139.111	24.5225	3.38358	7.24749	4.24556e-13	3.61217e-11
BnaA02G0246100ZS	DAP-147	DAP-24	78.8356	0.27667	39.5561	7.65978	1.0577	7.24193	4.42343e-13	3.75503e-11
BnaC07G0195200ZS	DAP-147	DAP-24	361.422	30.8022	196.112	3.54688	0.489979	7.23885	4.5249e-13	3.83254e-11
BnaA07G0198300ZS	DAP-147	DAP-24	168.922	9.51186	89.2172	4.11333	0.568448	7.23608	4.61851e-13	3.90305e-11
BnaA09G0116200ZS	DAP-147	DAP-24	2.05603	42.5848	22.3204	-4.3708	0.604074	-7.23553	4.63712e-13	3.91002e-11
BnaC05G0525100ZS	DAP-147	DAP-24	48.9596	6.37167	27.6656	2.93843	0.40617	7.23449	4.67279e-13	3.9313e-11
BnaC02G0040400ZS	DAP-147	DAP-24	0	45.1847	22.5923	-8.34002	1.15318	-7.2322	4.75241e-13	3.98938e-11
BnaC09G0568500ZS	DAP-147	DAP-24	132.181	35.7372	83.9589	1.88139	0.260331	7.22692	4.94089e-13	4.13838e-11
BnaC04G0420700ZS	DAP-147	DAP-24	1095.38	7756.41	4425.9	-2.82409	0.391178	-7.21946	5.21947e-13	4.36202e-11
BnaA08G0243500ZS	DAP-147	DAP-24	108.711	17.5198	63.1156	2.60875	0.361444	7.21756	5.29285e-13	4.41355e-11
BnaA04G0272400ZS	DAP-147	DAP-24	0	78.5708	39.2854	-9.14337	1.26874	-7.20665	5.7346e-13	4.77137e-11
BnaC06G0252600ZS	DAP-147	DAP-24	901.758	2816.87	1859.31	-1.64356	0.228217	-7.20176	5.9439e-13	4.93462e-11
BnaC07G0381100ZS	DAP-147	DAP-24	109.727	333.704	221.716	-1.60369	0.222727	-7.20028	6.00892e-13	4.97763e-11
BnaA06G0135100ZS	DAP-147	DAP-24	21.4116	92.4729	56.9423	-2.11238	0.293966	-7.1858	6.6817e-13	5.52281e-11
BnaC04G0534700ZS	DAP-147	DAP-24	41.7024	123.769	82.7358	-1.56473	0.217959	-7.17904	7.02035e-13	5.79003e-11
BnaC08G0526000ZS	DAP-147	DAP-24	101.556	0	50.7781	8.74791	1.22247	7.15592	8.31164e-13	6.84004e-11
BnaC08G0133500ZS	DAP-147	DAP-24	10.1413	72.2079	41.1746	-2.8347	0.396162	-7.15542	8.34185e-13	6.84995e-11
BnaA05G0136600ZS	DAP-147	DAP-24	5.85351	66.8749	36.3642	-3.53661	0.494347	-7.15412	8.42121e-13	6.88727e-11
BnaC05G0098400ZS	DAP-147	DAP-24	756.35	2029.29	1392.82	-1.42396	0.199042	-7.15408	8.42384e-13	6.88727e-11
BnaC05G0063500ZS	DAP-147	DAP-24	43.0518	168.112	105.582	-1.96857	0.275382	-7.14848	8.77437e-13	7.15833e-11
BnaA09G0217500ZS	DAP-147	DAP-24	168.558	550.215	359.386	-1.70709	0.238928	-7.1448	9.01297e-13	7.3371e-11
BnaA05G0318600ZS	DAP-147	DAP-24	0	34.1187	17.0593	-7.93747	1.11163	-7.14039	9.30665e-13	7.55985e-11
BnaC07G0411900ZS	DAP-147	DAP-24	47.2019	2.62161	24.9118	4.20347	0.589024	7.13633	9.58525e-13	7.76941e-11
BnaC05G0439600ZS	DAP-147	DAP-24	0.396268	70.4783	35.4373	-7.54077	1.05813	-7.12649	1.02961e-12	8.32767e-11
BnaA08G0306300ZS	DAP-147	DAP-24	483.011	2785.51	1634.26	-2.52807	0.355786	-7.1056	1.198e-12	9.65304e-11
BnaC06G0061400ZS	DAP-147	DAP-24	16.7132	81.2846	48.9989	-2.28282	0.321274	-7.10553	1.19859e-12	9.65304e-11
BnaC05G0460800ZS	DAP-147	DAP-24	0	39.4723	19.7362	-8.14604	1.14718	-7.1009	1.23947e-12	9.96096e-11
BnaA03G0221300ZS	DAP-147	DAP-24	69.6486	0.306186	34.9774	7.48228	1.05404	7.09867	1.25966e-12	1.01017e-10
BnaA01G0337000ZS	DAP-147	DAP-24	18.5026	1183.03	600.766	-6.00309	0.846137	-7.0947	1.29635e-12	1.03738e-10
BnaA07G0072100ZS	DAP-147	DAP-24	64.8094	10.4876	37.6485	2.62459	0.370779	7.07858	1.45639e-12	1.16298e-10
BnaC04G0063000ZS	DAP-147	DAP-24	1.3564	38.106	19.7312	-4.84853	0.685033	-7.0778	1.46458e-12	1.16705e-10
BnaA02G0288700ZS	DAP-147	DAP-24	6.13598	42.3915	24.2638	-2.80368	0.397002	-7.06213	1.63965e-12	1.30271e-10
BnaC05G0455400ZS	DAP-147	DAP-24	124.386	37.4782	80.9323	1.72248	0.243909	7.06196	1.64173e-12	1.30271e-10
BnaA06G0326400ZS	DAP-147	DAP-24	65.6294	2.81669	34.223	4.52347	0.641222	7.05446	1.73277e-12	1.37205e-10
BnaC09G0303400ZS	DAP-147	DAP-24	1600	6304.89	3952.44	-1.97846	0.280479	-7.05384	1.74044e-12	1.37524e-10
BnaC05G0114400ZS	DAP-147	DAP-24	71.01	177.102	124.056	-1.31569	0.186602	-7.0508	1.77894e-12	1.40272e-10
BnaC05G0479900ZS	DAP-147	DAP-24	0.203407	46.3391	23.2712	-7.65758	1.08611	-7.05046	1.78326e-12	1.40319e-10
BnaC02G0399700ZS	DAP-147	DAP-24	8.98795	83.2793	46.1336	-3.2147	0.456803	-7.0374	1.95859e-12	1.53794e-10
BnaC07G0364800ZS	DAP-147	DAP-24	128.49	17.7743	73.1321	2.86957	0.408078	7.03192	2.03707e-12	1.59624e-10
BnaC03G0555700ZS	DAP-147	DAP-24	2.063	51.4481	26.7556	-4.63983	0.660678	-7.02284	2.17401e-12	1.70001e-10
BnaA07G0141000ZS	DAP-147	DAP-24	3.31665	64.1565	33.7366	-4.29637	0.612194	-7.01798	2.25106e-12	1.75662e-10
BnaC07G0400700ZS	DAP-147	DAP-24	0.406813	112.543	56.475	-8.21126	1.17029	-7.01645	2.2758e-12	1.77225e-10
BnaC08G0288100ZS	DAP-147	DAP-24	39.606	151.053	95.3293	-1.93474	0.275787	-7.01535	2.2938e-12	1.78259e-10
BnaC01G0186100ZS	DAP-147	DAP-24	288.058	1360.06	824.058	-2.23943	0.319249	-7.0147	2.30448e-12	1.7872e-10
BnaC05G0079800ZS	DAP-147	DAP-24	10.1933	64.9273	37.5603	-2.67386	0.381629	-7.00645	2.44444e-12	1.89185e-10
BnaC02G0345100ZS	DAP-147	DAP-24	2.9345	57.3522	30.1434	-4.31876	0.616527	-7.00498	2.47029e-12	1.90795e-10
BnaC01G0123200ZS	DAP-147	DAP-24	64.2652	204.28	134.273	-1.66718	0.238163	-7.00016	2.55666e-12	1.97062e-10
BnaC08G0417200ZS	DAP-147	DAP-24	1.33511	34.1038	17.7194	-4.69397	0.670769	-6.99789	2.59853e-12	1.9988e-10
BnaA10G0301000ZS	DAP-147	DAP-24	1.11719	37.0309	19.074	-5.02784	0.71925	-6.99039	2.74114e-12	2.1042e-10
BnaC08G0476800ZS	DAP-147	DAP-24	120.76	0.306186	60.5329	8.2764	1.18429	6.98852	2.77805e-12	2.1282e-10
BnaA05G0081500ZS	DAP-147	DAP-24	20.5819	173.433	97.0075	-3.07947	0.440711	-6.98751	2.79817e-12	2.13927e-10
BnaA09G0460900ZS	DAP-147	DAP-24	2.64139	32.3795	17.5104	-3.60957	0.516893	-6.9832	2.88531e-12	2.20142e-10
BnaC07G0357800ZS	DAP-147	DAP-24	9.92464	346.469	178.197	-5.13572	0.73556	-6.98206	2.9088e-12	2.21486e-10
BnaA09G0169600ZS	DAP-147	DAP-24	28.9098	102.58	65.7447	-1.82745	0.261826	-6.97961	2.95993e-12	2.24925e-10
BnaA06G0259000ZS	DAP-147	DAP-24	147.221	388.693	267.957	-1.39885	0.200456	-6.97835	2.98676e-12	2.26507e-10
BnaC08G0263900ZS	DAP-147	DAP-24	211.101	68.6692	139.885	1.62324	0.23265	6.97721	3.01106e-12	2.27892e-10
BnaA07G0068500ZS	DAP-147	DAP-24	77.0473	10.9966	44.022	2.79453	0.400624	6.97545	3.04888e-12	2.30291e-10
BnaC06G0175500ZS	DAP-147	DAP-24	59.9062	8.90985	34.408	2.78011	0.398612	6.97447	3.07022e-12	2.31439e-10
BnaA09G0382000ZS	DAP-147	DAP-24	8.30571	46.5215	27.4136	-2.4903	0.357119	-6.97332	3.09547e-12	2.32877e-10
BnaA06G0444700ZS	DAP-147	DAP-24	86.2418	5.02569	45.6337	4.139	0.593579	6.97296	3.10343e-12	2.33011e-10
BnaC07G0067700ZS	DAP-147	DAP-24	116.217	29.4543	72.8356	1.97364	0.283096	6.97164	3.13274e-12	2.34743e-10
BnaC03G0481900ZS	DAP-147	DAP-24	0.203407	51.8703	26.0369	-7.82111	1.12246	-6.96782	3.21881e-12	2.40715e-10
BnaC09G0595300ZS	DAP-147	DAP-24	18.3761	80.0802	49.2282	-2.12986	0.305726	-6.96657	3.24764e-12	2.42389e-10
BnaC02G0045000ZS	DAP-147	DAP-24	9.18743	81.4762	45.3318	-3.14428	0.451774	-6.95984	3.40659e-12	2.53751e-10
BnaA01G0348500ZS	DAP-147	DAP-24	0.542576	56.104	28.3233	-6.64308	0.954605	-6.95898	3.4275e-12	2.54805e-10
BnaA05G0088800ZS	DAP-147	DAP-24	0	30.5693	15.2847	-7.77623	1.12044	-6.94036	3.91102e-12	2.90177e-10
BnaA04G0257900ZS	DAP-147	DAP-24	46.3438	4.45939	25.4016	3.37593	0.486461	6.93979	3.92687e-12	2.90781e-10
BnaA01G0337200ZS	DAP-147	DAP-24	9.75465	651.099	330.427	-6.06853	0.874584	-6.93876	3.95548e-12	2.91844e-10
BnaC02G0217500ZS	DAP-147	DAP-24	1.18483	34.9356	18.0602	-4.93827	0.711698	-6.93872	3.95671e-12	2.91844e-10
BnaC04G0033700ZS	DAP-147	DAP-24	0	34.3496	17.1748	-7.95509	1.14704	-6.93535	4.05227e-12	2.98309e-10
BnaC04G0342700ZS	DAP-147	DAP-24	40.9185	0	20.4593	7.43593	1.07258	6.93277	4.12677e-12	3.03201e-10
BnaC05G0491700ZS	DAP-147	DAP-24	84.2477	13.2953	48.7715	2.67668	0.386156	6.9316	4.16117e-12	3.05134e-10
BnaC04G0391200ZS	DAP-147	DAP-24	15.2528	97.2341	56.2434	-2.6823	0.38708	-6.92957	4.22111e-12	3.08928e-10
BnaA09G0193100ZS	DAP-147	DAP-24	0	30.991	15.4955	-7.80327	1.12621	-6.92879	4.24442e-12	3.09472e-10
BnaA05G0481400ZS	DAP-147	DAP-24	6.79583	42.9299	24.8629	-2.66134	0.3841	-6.92878	4.24497e-12	3.09472e-10
BnaA09G0218400ZS	DAP-147	DAP-24	16.7253	67.647	42.1861	-2.01546	0.291104	-6.9235	4.40617e-12	3.20604e-10
BnaC09G0189500ZS	DAP-147	DAP-24	40.4275	119.443	79.9353	-1.56035	0.225456	-6.92087	4.48869e-12	3.25566e-10
BnaC06G0397400ZS	DAP-147	DAP-24	0.735437	44.0834	22.4094	-5.87605	0.849044	-6.92078	4.49163e-12	3.25566e-10
BnaA07G0215800ZS	DAP-147	DAP-24	260.23	1170.44	715.334	-2.16966	0.314245	-6.90435	5.04327e-12	3.64544e-10
BnaA08G0116000ZS	DAP-147	DAP-24	22.934	95.2168	59.0754	-2.05664	0.297883	-6.9042	5.04874e-12	3.64544e-10
BnaC02G0329800ZS	DAP-147	DAP-24	40.4397	0	20.2199	7.4195	1.07541	6.8992	5.22976e-12	3.76893e-10
BnaC04G0387500ZS	DAP-147	DAP-24	119.215	28.9127	74.0638	2.05334	0.297688	6.89762	5.28816e-12	3.80374e-10
BnaA08G0296600ZS	DAP-147	DAP-24	120.993	11.0903	66.0417	3.47716	0.504212	6.89623	5.34008e-12	3.83377e-10
BnaA08G0225200ZS	DAP-147	DAP-24	39.6968	110.661	75.1787	-1.47888	0.214491	-6.89481	5.39367e-12	3.86488e-10
BnaC05G0165500ZS	DAP-147	DAP-24	60.4616	7.6119	34.0367	2.98525	0.433738	6.88261	5.87677e-12	4.20306e-10
BnaA09G0162800ZS	DAP-147	DAP-24	689.101	2512.99	1601.04	-1.86667	0.271262	-6.88141	5.9264e-12	4.23053e-10
BnaC02G0100100ZS	DAP-147	DAP-24	45.0266	5.68479	25.3557	2.97223	0.43201	6.88001	5.98504e-12	4.26431e-10
BnaC05G0507800ZS	DAP-147	DAP-24	10.5195	54.668	32.5938	-2.38526	0.34678	-6.87831	6.05651e-12	4.30709e-10
BnaC04G0174000ZS	DAP-147	DAP-24	14.874	81.6949	48.2845	-2.45969	0.357679	-6.87682	6.12031e-12	4.34427e-10
BnaC03G0161400ZS	DAP-147	DAP-24	85.0052	23.5436	54.2744	1.86212	0.270853	6.87505	6.19691e-12	4.39037e-10
BnaA09G0212200ZS	DAP-147	DAP-24	90.5779	28.1525	59.3652	1.68791	0.24571	6.86952	6.4417e-12	4.55524e-10
BnaA07G0295100ZS	DAP-147	DAP-24	445.646	145.697	295.672	1.61302	0.234884	6.8673	6.54277e-12	4.61804e-10
BnaA01G0183700ZS	DAP-147	DAP-24	45.3241	2.1517	23.7379	4.35084	0.63388	6.86383	6.70378e-12	4.72285e-10
BnaA09G0261600ZS	DAP-147	DAP-24	105.517	365.371	235.444	-1.793	0.261292	-6.86205	6.78805e-12	4.77329e-10
BnaA02G0091200ZS	DAP-147	DAP-24	66.6622	17.299	41.9806	1.94971	0.28441	6.85528	7.11733e-12	4.99449e-10
BnaC08G0331400ZS	DAP-147	DAP-24	58.0643	216.427	137.246	-1.89703	0.276734	-6.85504	7.12912e-12	4.99449e-10
BnaC04G0543000ZS	DAP-147	DAP-24	61.304	9.74171	35.5229	2.64064	0.385263	6.85413	7.17487e-12	5.01722e-10
BnaA02G0261500ZS	DAP-147	DAP-24	0.960134	34.6327	17.7964	-5.18758	0.757925	-6.84446	7.67668e-12	5.35818e-10
BnaC02G0248300ZS	DAP-147	DAP-24	1.17429	32.1664	16.6703	-4.82428	0.705833	-6.83488	8.20757e-12	5.71288e-10
BnaA02G0080600ZS	DAP-147	DAP-24	256.037	76.3674	166.202	1.7493	0.255942	6.83474	8.21517e-12	5.71288e-10
BnaA01G0190400ZS	DAP-147	DAP-24	6.70362	42.7613	24.7325	-2.68378	0.392701	-6.83415	8.2491e-12	5.72591e-10
BnaC04G0149200ZS	DAP-147	DAP-24	3.15523	53.4183	28.2868	-4.11378	0.602297	-6.83016	8.48207e-12	5.87679e-10
BnaA09G0041100ZS	DAP-147	DAP-24	1.68483	31.1181	16.4015	-4.20047	0.615156	-6.82831	8.59206e-12	5.94208e-10
BnaC06G0387800ZS	DAP-147	DAP-24	1.85262	34.6557	18.2541	-4.21239	0.617142	-6.82565	8.75295e-12	6.03597e-10
BnaC08G0110100ZS	DAP-147	DAP-24	210.92	950.457	580.689	-2.1722	0.318246	-6.82553	8.75985e-12	6.03597e-10
BnaC07G0403500ZS	DAP-147	DAP-24	5.6681	43.4838	24.576	-2.94508	0.432015	-6.81706	9.29204e-12	6.39099e-10
BnaC04G0611400ZS	DAP-147	DAP-24	160.071	15.401	87.7359	3.37969	0.496047	6.81325	9.54198e-12	6.55095e-10
BnaA04G0137000ZS	DAP-147	DAP-24	0.203407	76.7608	38.4821	-8.38433	1.23182	-6.80644	1.00042e-11	6.85576e-10
BnaC02G0282400ZS	DAP-147	DAP-24	425.781	923.721	674.751	-1.11765	0.164266	-6.80392	1.01808e-11	6.96416e-10
BnaC03G0694400ZS	DAP-147	DAP-24	10.4938	54.0918	32.2928	-2.37749	0.349528	-6.802	1.03179e-11	7.04513e-10
BnaA09G0141300ZS	DAP-147	DAP-24	0	26.739	13.3695	-7.58522	1.11687	-6.79147	1.10997e-11	7.56524e-10
BnaA05G0007400ZS	DAP-147	DAP-24	48.1177	6.17659	27.1472	2.98022	0.439039	6.78805	1.13659e-11	7.73268e-10
BnaA03G0193800ZS	DAP-147	DAP-24	392.25	1656.49	1024.37	-2.07857	0.306285	-6.78638	1.14984e-11	7.80876e-10
BnaA02G0164700ZS	DAP-147	DAP-24	1.33531	35.813	18.5742	-4.75866	0.701954	-6.77916	1.20881e-11	8.19028e-10
BnaC05G0530000ZS	DAP-147	DAP-24	15.9888	94.7357	55.3623	-2.57446	0.379772	-6.77897	1.21037e-11	8.19028e-10
BnaA03G0375100ZS	DAP-147	DAP-24	0.203407	39.8114	20.0074	-7.43915	1.09751	-6.77822	1.21665e-11	8.21806e-10
BnaA03G0047800ZS	DAP-147	DAP-24	0	35.8579	17.929	-8.00523	1.18151	-6.77545	1.24018e-11	8.36201e-10
BnaC04G0012500ZS	DAP-147	DAP-24	3.51589	55.7594	29.6377	-4.00807	0.591858	-6.77202	1.27001e-11	8.54783e-10
BnaC02G0053300ZS	DAP-147	DAP-24	1.00649	36.235	18.6207	-5.24865	0.775371	-6.76921	1.29488e-11	8.69969e-10
BnaA01G0011500ZS	DAP-147	DAP-24	28.3262	165.004	96.665	-2.53856	0.375214	-6.76563	1.32726e-11	8.90139e-10
BnaA03G0032200ZS	DAP-147	DAP-24	6.3778	56.9064	31.6421	-3.17137	0.468861	-6.76398	1.34253e-11	8.98778e-10
BnaA07G0261900ZS	DAP-147	DAP-24	60.8561	10.1212	35.4886	2.57877	0.381414	6.76108	1.36969e-11	9.15336e-10
BnaA05G0098800ZS	DAP-147	DAP-24	10.4088	93.1058	51.7573	-3.16678	0.46849	-6.75954	1.38432e-11	9.23473e-10
BnaC06G0063000ZS	DAP-147	DAP-24	0	43.415	21.7075	-8.28725	1.22685	-6.75492	1.42918e-11	9.51718e-10
BnaC09G0585300ZS	DAP-147	DAP-24	81.8408	324.338	203.089	-1.98729	0.294254	-6.75365	1.44168e-11	9.58348e-10
BnaA09G0006800ZS	DAP-147	DAP-24	206.939	414.464	310.701	-1.00194	0.148438	-6.74987	1.47981e-11	9.81961e-10
BnaA04G0000400ZS	DAP-147	DAP-24	158.994	62.3369	110.666	1.34832	0.200048	6.73998	1.58413e-11	1.04934e-09
BnaC08G0048300ZS	DAP-147	DAP-24	76.1507	320.382	198.266	-2.07435	0.308139	-6.73185	1.67524e-11	1.10774e-09
BnaC06G0418100ZS	DAP-147	DAP-24	0	36.9227	18.4613	-8.05598	1.19778	-6.72575	1.74695e-11	1.15314e-09
BnaA04G0277100ZS	DAP-147	DAP-24	15.9064	78.2739	47.0901	-2.30668	0.343151	-6.72206	1.79175e-11	1.18064e-09
BnaA09G0194300ZS	DAP-147	DAP-24	0.203407	46.0951	23.1492	-7.64613	1.13777	-6.72028	1.81374e-11	1.19305e-09
BnaC09G0186400ZS	DAP-147	DAP-24	6.50699	44.9483	25.7277	-2.79313	0.415699	-6.71911	1.82833e-11	1.20055e-09
BnaA09G0016200ZS	DAP-147	DAP-24	213.834	440.467	327.15	-1.04121	0.155007	-6.7172	1.85254e-11	1.21433e-09
BnaA03G0194300ZS	DAP-147	DAP-24	6.26797	39.2801	22.774	-2.64643	0.395315	-6.69447	2.16449e-11	1.41635e-09
BnaA03G0385900ZS	DAP-147	DAP-24	0.192861	36.5333	18.3631	-7.31837	1.09401	-6.68947	2.23982e-11	1.4631e-09
BnaC06G0218400ZS	DAP-147	DAP-24	95.5856	309.099	202.342	-1.69537	0.2537	-6.68259	2.34753e-11	1.53081e-09
BnaC05G0103600ZS	DAP-147	DAP-24	7.04579	43.2151	25.1304	-2.61787	0.392004	-6.67817	2.41948e-11	1.575e-09
BnaC08G0230600ZS	DAP-147	DAP-24	2.28093	35.7251	19.003	-3.96916	0.5945	-6.67647	2.44759e-11	1.59056e-09
BnaA08G0269500ZS	DAP-147	DAP-24	41.6584	165.773	103.716	-1.98989	0.29836	-6.66942	2.56822e-11	1.66608e-09
BnaA01G0306300ZS	DAP-147	DAP-24	47.3042	3.01057	25.1574	3.9075	0.585985	6.66826	2.58858e-11	1.6764e-09
BnaC09G0277400ZS	DAP-147	DAP-24	176.546	432.897	304.722	-1.29348	0.194037	-6.66615	2.62598e-11	1.6977e-09
BnaC02G0370100ZS	DAP-147	DAP-24	78.5396	21.433	49.9863	1.86342	0.279669	6.66294	2.68407e-11	1.73228e-09
BnaC01G0281200ZS	DAP-147	DAP-24	0.599675	38.66	19.6298	-6.08422	0.913764	-6.65842	2.7679e-11	1.78333e-09
BnaC05G0565400ZS	DAP-147	DAP-24	3.68348	35.6886	19.686	-3.29952	0.495656	-6.65687	2.7972e-11	1.79914e-09
BnaC04G0214400ZS	DAP-147	DAP-24	100.845	8.98381	54.9145	3.5133	0.528177	6.65175	2.89625e-11	1.85967e-09
BnaC03G0809300ZS	DAP-147	DAP-24	0	24.8865	12.4433	-7.48065	1.12473	-6.65107	2.90961e-11	1.86507e-09
BnaA03G0139800ZS	DAP-147	DAP-24	85.6682	0.365879	43.017	7.78142	1.17008	6.6503	2.92494e-11	1.87171e-09
BnaC04G0590000ZS	DAP-147	DAP-24	0	111.288	55.6439	-9.64574	1.45161	-6.64487	3.03491e-11	1.93879e-09
BnaC05G0451200ZS	DAP-147	DAP-24	71.8178	207.622	139.72	-1.53329	0.230822	-6.64276	3.07868e-11	1.96343e-09
BnaC04G0369400ZS	DAP-147	DAP-24	130.536	833.056	481.796	-2.6749	0.403072	-6.63628	3.21703e-11	2.04819e-09
BnaA06G0257500ZS	DAP-147	DAP-24	37.6067	100.046	68.8263	-1.41492	0.213296	-6.63359	3.2762e-11	2.08235e-09
BnaA09G0139800ZS	DAP-147	DAP-24	0.203407	34.5852	17.3943	-7.23636	1.09108	-6.63231	3.30472e-11	2.09694e-09
BnaA02G0197900ZS	DAP-147	DAP-24	13.7358	58.6422	36.189	-2.09676	0.316255	-6.62998	3.35721e-11	2.12667e-09
BnaC08G0205600ZS	DAP-147	DAP-24	79.7061	13.8935	46.7998	2.53063	0.3819	6.62641	3.4394e-11	2.17507e-09
BnaA05G0088700ZS	DAP-147	DAP-24	0	24.2785	12.1393	-7.45211	1.12561	-6.62053	3.57914e-11	2.25639e-09
BnaA07G0202600ZS	DAP-147	DAP-24	0	27.0727	13.5364	-7.61162	1.14971	-6.6205	3.57996e-11	2.25639e-09
BnaA10G0033500ZS	DAP-147	DAP-24	226.687	678.823	452.755	-1.58245	0.239067	-6.61927	3.60969e-11	2.27133e-09
BnaC01G0280700ZS	DAP-147	DAP-24	0.599675	38.0771	19.3384	-6.06166	0.91583	-6.61876	3.62223e-11	2.27543e-09
BnaA07G0095500ZS	DAP-147	DAP-24	0.599675	40.1447	20.3722	-6.1365	0.928073	-6.61209	3.78927e-11	2.3764e-09
BnaA04G0165100ZS	DAP-147	DAP-24	35.2348	94.4393	64.837	-1.42359	0.215351	-6.61058	3.8282e-11	2.39682e-09
BnaC03G0524200ZS	DAP-147	DAP-24	154.759	436.015	295.387	-1.49413	0.226052	-6.60966	3.85205e-11	2.40775e-09
BnaA05G0461900ZS	DAP-147	DAP-24	0.406813	87.4354	43.9211	-7.84601	1.18854	-6.60136	4.07404e-11	2.54229e-09
BnaC04G0545900ZS	DAP-147	DAP-24	45.1861	4.39131	24.7887	3.42549	0.520176	6.58526	4.54104e-11	2.82903e-09
BnaA01G0025500ZS	DAP-147	DAP-24	101.069	2.1517	51.6105	5.52146	0.840016	6.57303	4.93003e-11	3.06125e-09
BnaC03G0182700ZS	DAP-147	DAP-24	0.182116	33.2551	16.7186	-7.18385	1.09293	-6.57303	4.93003e-11	3.06125e-09
BnaA07G0282700ZS	DAP-147	DAP-24	39.1106	0	19.5553	7.37227	1.12252	6.56758	5.11379e-11	3.17013e-09
BnaC06G0457600ZS	DAP-147	DAP-24	1.13848	28.4974	14.8179	-4.65591	0.70978	-6.55965	5.39325e-11	3.33788e-09
BnaC03G0283200ZS	DAP-147	DAP-24	96.8645	374.583	235.724	-1.95118	0.298152	-6.54424	5.97983e-11	3.69485e-09
BnaA08G0200000ZS	DAP-147	DAP-24	0.203407	33.1208	16.6621	-7.1759	1.09689	-6.54202	6.06954e-11	3.74215e-09
BnaC08G0006100ZS	DAP-147	DAP-24	59.4977	223.957	141.727	-1.91349	0.292514	-6.54153	6.08915e-11	3.74215e-09
BnaC07G0320200ZS	DAP-147	DAP-24	6.75702	40.9319	23.8445	-2.59064	0.396035	-6.54145	6.09244e-11	3.74215e-09
BnaC04G0073400ZS	DAP-147	DAP-24	38.4504	143.857	91.1538	-1.90716	0.291554	-6.54136	6.0961e-11	3.74215e-09
BnaC07G0370200ZS	DAP-147	DAP-24	0.935071	28.4747	14.7049	-4.92115	0.753002	-6.53537	6.34516e-11	3.88871e-09
BnaC02G0291100ZS	DAP-147	DAP-24	2.88418	29.3709	16.1275	-3.36806	0.515693	-6.53113	6.52755e-11	3.99399e-09
BnaC05G0345200ZS	DAP-147	DAP-24	25.9253	173.472	99.6987	-2.7468	0.420941	-6.52539	6.7827e-11	4.14338e-09
BnaA08G0270600ZS	DAP-147	DAP-24	0.360459	61.4849	30.9227	-7.34592	1.12653	-6.52085	6.99097e-11	4.2637e-09
BnaA06G0114100ZS	DAP-147	DAP-24	131.057	16.0943	73.5755	3.0388	0.466519	6.51378	7.32826e-11	4.46219e-09
BnaA09G0040000ZS	DAP-147	DAP-24	2325.23	7834.81	5080.02	-1.7526	0.269081	-6.51326	7.3538e-11	4.47052e-09
BnaC04G0575400ZS	DAP-147	DAP-24	1.16354	30.5026	15.8331	-4.75202	0.729927	-6.51026	7.50193e-11	4.55322e-09
BnaA02G0063800ZS	DAP-147	DAP-24	10.6584	52.2707	31.4645	-2.30137	0.353589	-6.50862	7.58459e-11	4.596e-09
BnaC08G0001900ZS	DAP-147	DAP-24	1.74213	31.8616	16.8019	-4.21498	0.647637	-6.50825	7.60338e-11	4.59998e-09
BnaC09G0223200ZS	DAP-147	DAP-24	0	35.6023	17.8011	-8.00427	1.23052	-6.50476	7.78171e-11	4.70033e-09
BnaC06G0229200ZS	DAP-147	DAP-24	46.6395	0.27667	23.4581	6.90307	1.06173	6.50173	7.93998e-11	4.78158e-09
BnaC08G0121400ZS	DAP-147	DAP-24	44.6527	0	22.3264	7.56021	1.1628	6.5017	7.9416e-11	4.78158e-09
BnaC04G0282300ZS	DAP-147	DAP-24	0.203407	129.014	64.6089	-9.1355	1.40518	-6.50132	7.96202e-11	4.78623e-09
BnaA03G0035500ZS	DAP-147	DAP-24	2.64139	34.9534	18.7974	-3.72693	0.573347	-6.5003	8.01618e-11	4.81111e-09
BnaC08G0214600ZS	DAP-147	DAP-24	403.681	1379.62	891.653	-1.7731	0.272786	-6.49998	8.03305e-11	4.81357e-09
BnaC09G0108500ZS	DAP-147	DAP-24	28.0333	153.569	90.8013	-2.46022	0.378896	-6.49311	8.40816e-11	5.03035e-09
BnaC03G0316900ZS	DAP-147	DAP-24	178.7	477.496	328.098	-1.4184	0.218487	-6.49192	8.47504e-11	5.06232e-09
BnaC05G0113600ZS	DAP-147	DAP-24	1.18483	31.0462	16.1155	-4.76628	0.734393	-6.4901	8.57787e-11	5.11564e-09
BnaA06G0329000ZS	DAP-147	DAP-24	100.354	24.497	62.4257	2.04887	0.316165	6.4804	9.14794e-11	5.447e-09
BnaA01G0255800ZS	DAP-147	DAP-24	199.966	531.778	365.872	-1.41121	0.217862	-6.47756	9.32152e-11	5.5416e-09
BnaC06G0230200ZS	DAP-147	DAP-24	422.942	1548.32	985.632	-1.87271	0.289168	-6.4762	9.40589e-11	5.58295e-09
BnaC03G0248800ZS	DAP-147	DAP-24	2.14497	30.5	16.3225	-3.86565	0.596962	-6.47554	9.44717e-11	5.59864e-09
BnaA06G0336900ZS	DAP-147	DAP-24	8.61577	412.922	210.769	-5.59274	0.864285	-6.47095	9.73866e-11	5.76069e-09
BnaC02G0411500ZS	DAP-147	DAP-24	60.8744	11.609	36.2417	2.37331	0.366774	6.47076	9.75119e-11	5.76069e-09
BnaC01G0353300ZS	DAP-147	DAP-24	23.8052	92.9941	58.3997	-1.96517	0.304028	-6.46379	1.02113e-10	6.02305e-09
BnaA01G0221300ZS	DAP-147	DAP-24	0.203407	35.6442	17.9238	-7.28405	1.12718	-6.46217	1.03215e-10	6.07854e-09
BnaC02G0261100ZS	DAP-147	DAP-24	134.499	39.4837	86.9915	1.77249	0.274422	6.45898	1.0541e-10	6.19814e-09
BnaA02G0244100ZS	DAP-147	DAP-24	10.9435	50.8771	30.9103	-2.22136	0.344071	-6.4561	1.07432e-10	6.30722e-09
BnaA03G0082500ZS	DAP-147	DAP-24	33.9096	130.016	81.9626	-1.93617	0.299981	-6.45429	1.08727e-10	6.37332e-09
BnaC01G0230400ZS	DAP-147	DAP-24	100.478	13.6164	57.0473	2.89329	0.448616	6.44937	1.1232e-10	6.57367e-09
BnaA01G0413200ZS	DAP-147	DAP-24	126.476	294.25	210.363	-1.21529	0.188472	-6.44808	1.13273e-10	6.61916e-09
BnaA06G0116700ZS	DAP-147	DAP-24	268.764	100.516	184.64	1.42647	0.221343	6.44463	1.15886e-10	6.76138e-09
BnaA07G0218400ZS	DAP-147	DAP-24	1.33114	30.9018	16.1165	-4.54976	0.70601	-6.44433	1.16116e-10	6.76434e-09
BnaC04G0581800ZS	DAP-147	DAP-24	156.501	27.0983	91.7996	2.53489	0.393579	6.4406	1.19002e-10	6.92176e-09
BnaA04G0173100ZS	DAP-147	DAP-24	8.84879	62.7737	35.8112	-2.83224	0.440146	-6.43477	1.23658e-10	7.18153e-09
BnaC07G0463000ZS	DAP-147	DAP-24	0.396268	43.2856	21.8409	-6.83771	1.06272	-6.43414	1.24171e-10	7.19637e-09
BnaC07G0307200ZS	DAP-147	DAP-24	47.3974	9.01572	28.2065	2.40278	0.373451	6.43399	1.24296e-10	7.19637e-09
BnaC04G0546000ZS	DAP-147	DAP-24	56.7566	9.00734	32.882	2.69526	0.419029	6.43217	1.25795e-10	7.27198e-09
BnaC05G0094300ZS	DAP-147	DAP-24	2.85931	27.9946	15.4269	-3.29889	0.512955	-6.43115	1.26643e-10	7.30983e-09
BnaC03G0620400ZS	DAP-147	DAP-24	7.0247	36.3473	21.686	-2.37805	0.370557	-6.41749	1.38541e-10	7.9843e-09
BnaA08G0303900ZS	DAP-147	DAP-24	46.1363	8.00784	27.0721	2.52946	0.394192	6.41684	1.39132e-10	8.00617e-09
BnaC09G0246900ZS	DAP-147	DAP-24	76.6845	23.5873	50.1359	1.71121	0.266994	6.40916	1.46328e-10	8.40739e-09
BnaA03G0428100ZS	DAP-147	DAP-24	16.3483	123.027	69.6875	-2.91489	0.45494	-6.4072	1.4822e-10	8.50315e-09
BnaA10G0028700ZS	DAP-147	DAP-24	0	21.6448	10.8224	-7.27948	1.13851	-6.39388	1.61726e-10	9.26383e-09
BnaA01G0342600ZS	DAP-147	DAP-24	0	57.1391	28.5696	-8.68575	1.359	-6.39127	1.64516e-10	9.40935e-09
BnaC05G0459400ZS	DAP-147	DAP-24	33.7185	126.228	79.9731	-1.90874	0.298715	-6.38982	1.66082e-10	9.48456e-09
BnaA08G0067700ZS	DAP-147	DAP-24	137.138	436.675	286.907	-1.67185	0.261661	-6.38935	1.6659e-10	9.49914e-09
BnaC07G0083900ZS	DAP-147	DAP-24	212.315	1.65806	106.986	7.02846	1.10287	6.37286	1.85539e-10	1.05636e-08
BnaC06G0369300ZS	DAP-147	DAP-24	4.9079	67.9147	36.4113	-3.81398	0.598535	-6.37219	1.86342e-10	1.05934e-08
BnaC01G0148000ZS	DAP-147	DAP-24	11.3523	346.518	178.935	-4.94062	0.775935	-6.36732	1.92358e-10	1.09137e-08
BnaC09G0087900ZS	DAP-147	DAP-24	9.57385	93.4008	51.4873	-3.29426	0.517383	-6.36716	1.92556e-10	1.09137e-08
BnaC06G0350000ZS	DAP-147	DAP-24	87.9534	0.27667	44.115	7.81924	1.2284	6.36537	1.94815e-10	1.10252e-08
BnaA07G0097000ZS	DAP-147	DAP-24	20.5923	72.9722	46.7822	-1.81869	0.285874	-6.36187	1.99315e-10	1.1263e-08
BnaA04G0002200ZS	DAP-147	DAP-24	37.3873	106.434	71.9105	-1.51063	0.237489	-6.36083	2.00662e-10	1.13221e-08
BnaC09G0503600ZS	DAP-147	DAP-24	0.203407	29.4992	14.8513	-7.01006	1.10254	-6.3581	2.04271e-10	1.15085e-08
BnaC06G0015400ZS	DAP-147	DAP-24	28.074	0	14.037	6.89267	1.08509	6.35216	2.12313e-10	1.19437e-08
BnaA08G0229000ZS	DAP-147	DAP-24	0	21.9014	10.9507	-7.29694	1.15086	-6.34042	2.29137e-10	1.2871e-08
BnaA08G0267000ZS	DAP-147	DAP-24	21.1129	238.424	129.769	-3.50039	0.552112	-6.34	2.29772e-10	1.28874e-08
BnaC06G0082500ZS	DAP-147	DAP-24	0	23.2739	11.637	-7.38087	1.16431	-6.33927	2.30849e-10	1.29203e-08
BnaA05G0354000ZS	DAP-147	DAP-24	0	26.5507	13.2753	-7.57058	1.19426	-6.33914	2.31045e-10	1.29203e-08
BnaC04G0277300ZS	DAP-147	DAP-24	2.3416	30.7813	16.5615	-3.74877	0.591802	-6.3345	2.38105e-10	1.32954e-08
BnaC06G0323800ZS	DAP-147	DAP-24	52.5195	0	26.2597	7.79712	1.23139	6.33195	2.42088e-10	1.34978e-08
BnaA10G0107200ZS	DAP-147	DAP-24	109.584	25.2305	67.4075	2.09841	0.331593	6.32826	2.47941e-10	1.38038e-08
BnaC02G0390900ZS	DAP-147	DAP-24	39.1215	100.374	69.7477	-1.36011	0.215272	-6.31809	2.64822e-10	1.47218e-08
BnaA02G0028400ZS	DAP-147	DAP-24	2.67022	31.2563	16.9633	-3.55362	0.562642	-6.31594	2.68516e-10	1.49052e-08
BnaC09G0414800ZS	DAP-147	DAP-24	34.8965	118.925	76.9109	-1.7666	0.279774	-6.31439	2.71229e-10	1.50336e-08
BnaC07G0310200ZS	DAP-147	DAP-24	227.514	456.384	341.949	-1.00397	0.159181	-6.30709	2.84336e-10	1.5737e-08
BnaC04G0084400ZS	DAP-147	DAP-24	193.187	562.693	377.94	-1.54329	0.24479	-6.30456	2.89017e-10	1.59727e-08
BnaA04G0199900ZS	DAP-147	DAP-24	0.182116	27.6891	13.9356	-6.9136	1.09694	-6.30261	2.92679e-10	1.61514e-08
BnaC02G0093200ZS	DAP-147	DAP-24	4.02215	49.8755	26.9488	-3.61275	0.573697	-6.29732	3.02844e-10	1.66878e-08
BnaA01G0035800ZS	DAP-147	DAP-24	0	19.5868	9.79339	-7.14218	1.13454	-6.29522	3.06955e-10	1.68897e-08
BnaC03G0287300ZS	DAP-147	DAP-24	15.0978	57.0637	36.0807	-1.91199	0.303744	-6.29476	3.07881e-10	1.69159e-08
BnaA05G0394500ZS	DAP-147	DAP-24	8.01744	39.6711	23.8443	-2.31588	0.368457	-6.28536	3.27101e-10	1.79458e-08
BnaC04G0483800ZS	DAP-147	DAP-24	37.2248	2.51758	19.8712	3.871	0.61663	6.27766	3.43702e-10	1.88019e-08
BnaC03G0428100ZS	DAP-147	DAP-24	86.8191	5.26435	46.0417	4.10746	0.654553	6.27522	3.4915e-10	1.90722e-08
BnaC07G0044100ZS	DAP-147	DAP-24	5.85041	34.0215	19.936	-2.53304	0.403678	-6.27491	3.49844e-10	1.90825e-08
BnaA08G0185000ZS	DAP-147	DAP-24	0	21.6408	10.8204	-7.28304	1.16096	-6.27329	3.53502e-10	1.92541e-08
BnaC05G0198400ZS	DAP-147	DAP-24	94.5643	23.5129	59.0386	2.01446	0.321169	6.27227	3.55816e-10	1.93522e-08
BnaC03G0611300ZS	DAP-147	DAP-24	13.8807	54.4062	34.1434	-1.96317	0.313109	-6.26992	3.61237e-10	1.96187e-08
BnaA07G0255200ZS	DAP-147	DAP-24	1.97059	50.572	26.2713	-4.71938	0.753499	-6.26328	3.76951e-10	2.04165e-08
BnaA08G0194300ZS	DAP-147	DAP-24	0.203407	30.288	15.2457	-7.04075	1.12414	-6.26326	3.77016e-10	2.04165e-08
BnaC05G0196100ZS	DAP-147	DAP-24	2.42724	25.8609	14.144	-3.40177	0.54315	-6.26304	3.77551e-10	2.04165e-08
BnaA07G0159500ZS	DAP-147	DAP-24	0	19.8448	9.92241	-7.15158	1.14281	-6.25792	3.90156e-10	2.10679e-08
BnaA05G0359700ZS	DAP-147	DAP-24	73.791	158.926	116.358	-1.10455	0.176534	-6.25688	3.92764e-10	2.11783e-08
BnaC04G0020700ZS	DAP-147	DAP-24	8.99752	337.973	173.485	-5.24126	0.837948	-6.25488	3.97828e-10	2.14208e-08
BnaC01G0242500ZS	DAP-147	DAP-24	2.21608	31.3069	16.7615	-3.80559	0.608713	-6.25187	4.05574e-10	2.18067e-08
BnaC09G0500800ZS	DAP-147	DAP-24	0	23.34	11.67	-7.39171	1.18255	-6.25067	4.08686e-10	2.19427e-08
BnaA07G0167600ZS	DAP-147	DAP-24	453.191	2996.08	1724.63	-2.72526	0.436215	-6.24751	4.1704e-10	2.23594e-08
BnaC09G0258500ZS	DAP-147	DAP-24	0.756728	33.1561	16.9564	-5.45004	0.872535	-6.24622	4.20513e-10	2.25136e-08
BnaC04G0575200ZS	DAP-147	DAP-24	36.9164	3.51065	20.2135	3.39539	0.543762	6.24426	4.25814e-10	2.27651e-08
BnaC09G0216300ZS	DAP-147	DAP-24	28.9541	0	14.477	6.93871	1.11165	6.24183	4.32469e-10	2.30881e-08
BnaC05G0544100ZS	DAP-147	DAP-24	26.7804	92.3497	59.565	-1.78092	0.285386	-6.24038	4.36511e-10	2.32709e-08
BnaA06G0268300ZS	DAP-147	DAP-24	0.742209	29.6339	15.1881	-5.30243	0.849748	-6.24001	4.37555e-10	2.32936e-08
BnaC04G0427400ZS	DAP-147	DAP-24	9.01928	388.059	198.539	-5.43265	0.870905	-6.23793	4.43389e-10	2.35709e-08
BnaA03G0039200ZS	DAP-147	DAP-24	0.182116	27.9741	14.0781	-6.92902	1.11091	-6.23726	4.45314e-10	2.36399e-08
BnaC03G0669400ZS	DAP-147	DAP-24	73.8741	9.91892	41.8965	2.89911	0.464967	6.23508	4.51541e-10	2.39368e-08
BnaA09G0385000ZS	DAP-147	DAP-24	8.44127	51.7159	30.0786	-2.61806	0.42031	-6.22888	4.69794e-10	2.48694e-08
BnaA03G0147800ZS	DAP-147	DAP-24	0	20.6028	10.3014	-7.21331	1.15843	-6.22677	4.76136e-10	2.51698e-08
BnaC04G0254400ZS	DAP-147	DAP-24	174.414	69.3987	121.906	1.32288	0.212474	6.22609	4.78213e-10	2.52441e-08
BnaA03G0210800ZS	DAP-147	DAP-24	1.13848	24.7099	12.9242	-4.44453	0.713904	-6.22566	4.7953e-10	2.52783e-08
BnaC06G0391000ZS	DAP-147	DAP-24	0	19.5541	9.77704	-7.13534	1.14684	-6.22175	4.91628e-10	2.58798e-08
BnaA04G0287400ZS	DAP-147	DAP-24	51.6102	9.28465	30.4474	2.47922	0.398678	6.21861	5.01568e-10	2.63662e-08
BnaC05G0020700ZS	DAP-147	DAP-24	4.94738	31.5875	18.2674	-2.67827	0.430707	-6.21831	5.02535e-10	2.63803e-08
BnaC08G0234600ZS	DAP-147	DAP-24	3.05875	28.6614	15.8601	-3.24228	0.521661	-6.21529	5.12291e-10	2.6855e-08
BnaC02G0024400ZS	DAP-147	DAP-24	63.981	0.64255	32.3118	6.64461	1.06914	6.21494	5.13457e-10	2.68787e-08
BnaA10G0117800ZS	DAP-147	DAP-24	1.59542	48.4012	24.9983	-4.9665	0.79957	-6.21147	5.24928e-10	2.74411e-08
BnaC08G0381100ZS	DAP-147	DAP-24	11.9146	45.3032	28.6089	-1.92946	0.310839	-6.20727	5.39136e-10	2.81449e-08
BnaC03G0299300ZS	DAP-147	DAP-24	255.344	782.085	518.715	-1.61522	0.260254	-6.20633	5.4237e-10	2.82745e-08
BnaC01G0118500ZS	DAP-147	DAP-24	0	19.4276	9.71381	-7.12803	1.1498	-6.19936	5.66923e-10	2.94791e-08
BnaC01G0246200ZS	DAP-147	DAP-24	64.1644	136.624	100.394	-1.09444	0.176542	-6.19933	5.6704e-10	2.94791e-08
BnaC01G0404300ZS	DAP-147	DAP-24	10.2759	44.7717	27.5238	-2.12969	0.343582	-6.19848	5.70099e-10	2.95972e-08
BnaC04G0256300ZS	DAP-147	DAP-24	38.9066	96.14	67.5233	-1.30585	0.210759	-6.19595	5.79353e-10	3.00363e-08
BnaC04G0012900ZS	DAP-147	DAP-24	54.0963	9.00995	31.5531	2.56351	0.413757	6.1957	5.80282e-10	3.00432e-08
BnaC04G0180200ZS	DAP-147	DAP-24	3.00165	27.0182	15.0099	-3.16641	0.511162	-6.19454	5.84545e-10	3.02224e-08
BnaC04G0184200ZS	DAP-147	DAP-24	2.11313	26.2928	14.203	-3.65985	0.590882	-6.19388	5.86993e-10	3.03073e-08
BnaA01G0349400ZS	DAP-147	DAP-24	4.88311	51.1765	28.0298	-3.39231	0.547908	-6.19138	5.964e-10	3.07509e-08
BnaA02G0284700ZS	DAP-147	DAP-24	3.85128	34.0702	18.9607	-3.16678	0.511573	-6.19027	6.00598e-10	3.0925e-08
BnaA08G0077600ZS	DAP-147	DAP-24	124.867	374.409	249.638	-1.58597	0.25623	-6.18965	6.02985e-10	3.10056e-08
BnaA03G0508500ZS	DAP-147	DAP-24	0	24.3067	12.1533	-7.4548	1.20548	-6.18407	6.24696e-10	3.20782e-08
BnaC06G0283000ZS	DAP-147	DAP-24	0	20.73	10.365	-7.22028	1.1676	-6.18385	6.25561e-10	3.2079e-08
BnaC01G0512800ZS	DAP-147	DAP-24	72.3533	23.2457	47.7995	1.63687	0.264903	6.17914	6.44519e-10	3.30062e-08
BnaA03G0069400ZS	DAP-147	DAP-24	3.88012	35.1431	19.5116	-3.20271	0.519113	-6.16958	6.84698e-10	3.50162e-08
BnaA02G0416500ZS	DAP-147	DAP-24	1.33531	25.0309	13.1831	-4.23881	0.687143	-6.16875	6.88322e-10	3.51538e-08
BnaC02G0368500ZS	DAP-147	DAP-24	313.124	1466.07	889.595	-2.22758	0.361149	-6.16804	6.91398e-10	3.52348e-08
BnaA01G0120500ZS	DAP-147	DAP-24	49.4094	824.414	436.912	-4.06276	0.658688	-6.16796	6.91777e-10	3.52348e-08
BnaA08G0182700ZS	DAP-147	DAP-24	15.9557	56.5709	36.2633	-1.83263	0.297193	-6.16647	6.98306e-10	3.55194e-08
BnaC05G0475600ZS	DAP-147	DAP-24	0.203407	26.2712	13.2373	-6.84397	1.11133	-6.15837	7.34992e-10	3.7335e-08
BnaA06G0280500ZS	DAP-147	DAP-24	0.949589	24.6483	12.7989	-4.69977	0.763245	-6.15762	7.38451e-10	3.74602e-08
BnaA03G0067300ZS	DAP-147	DAP-24	0.203407	31.986	16.0947	-7.11905	1.15673	-6.15448	7.5323e-10	3.81586e-08
BnaA08G0201400ZS	DAP-147	DAP-24	2.28093	24.5905	13.4357	-3.43823	0.559073	-6.14989	7.75384e-10	3.92064e-08
BnaA02G0342100ZS	DAP-147	DAP-24	69.8495	201.861	135.855	-1.53333	0.249332	-6.14976	7.75994e-10	3.92064e-08
BnaA03G0523400ZS	DAP-147	DAP-24	45.9984	6.8345	26.4165	2.76868	0.450552	6.14508	7.99229e-10	4.03263e-08
BnaC04G0407900ZS	DAP-147	DAP-24	35.9666	1.56885	18.7677	4.49698	0.731831	6.14483	8.00478e-10	4.03296e-08
BnaA03G0224000ZS	DAP-147	DAP-24	1.00649	65.2225	33.1145	-6.07011	0.987871	-6.14464	8.01435e-10	4.03296e-08
BnaC02G0069800ZS	DAP-147	DAP-24	2.47359	25.2086	13.8411	-3.35276	0.545714	-6.14381	8.05633e-10	4.04868e-08
BnaA09G0188300ZS	DAP-147	DAP-24	41.3779	1.99387	21.6859	4.42097	0.720057	6.13976	8.26488e-10	4.14796e-08
BnaC04G0089800ZS	DAP-147	DAP-24	0.203407	25.1946	12.699	-6.78114	1.10468	-6.13855	8.3278e-10	4.17398e-08
BnaC06G0352600ZS	DAP-147	DAP-24	0.203407	25.0521	12.6277	-6.77025	1.10334	-6.13612	8.45616e-10	4.22984e-08
BnaA02G0010200ZS	DAP-147	DAP-24	15.4805	52.1287	33.8046	-1.75158	0.285459	-6.13602	8.46169e-10	4.22984e-08
BnaA07G0180500ZS	DAP-147	DAP-24	19.046	59.5235	39.2848	-1.64271	0.267812	-6.13384	8.5785e-10	4.27983e-08
BnaA10G0199800ZS	DAP-147	DAP-24	33.9613	165.457	99.7089	-2.28591	0.372678	-6.13373	8.58442e-10	4.27983e-08
BnaA01G0162400ZS	DAP-147	DAP-24	127.029	35.4421	81.2355	1.84487	0.300943	6.13029	8.77198e-10	4.36756e-08
BnaA06G0067400ZS	DAP-147	DAP-24	134.926	46.6165	90.7713	1.54217	0.251652	6.12818	8.88907e-10	4.42003e-08
BnaC09G0581600ZS	DAP-147	DAP-24	18.7117	65.464	42.0879	-1.81414	0.296053	-6.12777	8.9119e-10	4.42554e-08
BnaC03G0736200ZS	DAP-147	DAP-24	2.30899	28.9807	15.6448	-3.66671	0.598553	-6.12595	9.01448e-10	4.47059e-08
BnaC01G0284700ZS	DAP-147	DAP-24	24.0128	82.3251	53.1689	-1.7781	0.290271	-6.12564	9.03225e-10	4.47352e-08
BnaC05G0540400ZS	DAP-147	DAP-24	3.05875	33.5889	18.3238	-3.47119	0.566956	-6.1225	9.21209e-10	4.5566e-08
BnaA10G0047300ZS	DAP-147	DAP-24	583.849	3020.53	1802.19	-2.37134	0.387738	-6.11584	9.60516e-10	4.7448e-08
BnaC04G0306400ZS	DAP-147	DAP-24	29.5282	80.4694	54.9988	-1.44848	0.236858	-6.11538	9.63275e-10	4.7522e-08
BnaC09G0385400ZS	DAP-147	DAP-24	0.599675	31.9616	16.2806	-5.81163	0.950842	-6.11209	9.83375e-10	4.84502e-08
BnaA09G0155600ZS	DAP-147	DAP-24	2.84799	55.6362	29.2421	-4.29636	0.70315	-6.11016	9.95299e-10	4.89736e-08
BnaC01G0240600ZS	DAP-147	DAP-24	44.8355	0.926297	22.8809	5.55381	0.909256	6.10808	1.00839e-09	4.95529e-08
BnaC04G0105800ZS	DAP-147	DAP-24	44.7271	5.69253	25.2098	2.96671	0.485761	6.10734	1.01303e-09	4.97164e-08
BnaC07G0452000ZS	DAP-147	DAP-24	63.8595	10.1513	37.0054	2.64974	0.434072	6.10437	1.03206e-09	5.05846e-08
BnaC03G0544700ZS	DAP-147	DAP-24	26.872	163.931	95.4013	-2.61029	0.427702	-6.10305	1.04063e-09	5.09384e-08
BnaA07G0355200ZS	DAP-147	DAP-24	0	41.1146	20.5573	-8.20485	1.34513	-6.09966	1.06292e-09	5.19229e-08
BnaC08G0388000ZS	DAP-147	DAP-24	128.668	411.207	269.937	-1.67757	0.27503	-6.09958	1.0635e-09	5.19229e-08
BnaA05G0427800ZS	DAP-147	DAP-24	85.8172	237.331	161.574	-1.46559	0.24041	-6.09619	1.08625e-09	5.29647e-08
BnaA02G0196500ZS	DAP-147	DAP-24	87.2474	27.2788	57.2631	1.68287	0.27634	6.08987	1.13001e-09	5.50274e-08
BnaC06G0399400ZS	DAP-147	DAP-24	0.182116	48.7566	24.4694	-7.72929	1.26989	-6.08659	1.15341e-09	5.60603e-08
BnaC03G0218900ZS	DAP-147	DAP-24	42.8244	3.86945	23.3469	3.48034	0.571815	6.08648	1.1542e-09	5.60603e-08
BnaA06G0050900ZS	DAP-147	DAP-24	36.1699	96.5802	66.3751	-1.41993	0.233348	-6.08502	1.16479e-09	5.65019e-08
BnaC03G0488800ZS	DAP-147	DAP-24	46.0522	7.17205	26.6121	2.66035	0.437441	6.08162	1.18973e-09	5.76377e-08
BnaC08G0284400ZS	DAP-147	DAP-24	143.215	67.8896	105.552	1.0788	0.17772	6.07023	1.27729e-09	6.17211e-08
BnaA08G0200700ZS	DAP-147	DAP-24	66.3984	10.0454	38.2219	2.73629	0.450792	6.06997	1.27931e-09	6.17394e-08
BnaC08G0222500ZS	DAP-147	DAP-24	11.6323	52.0913	31.8618	-2.16534	0.356925	-6.06666	1.30597e-09	6.28875e-08
BnaA01G0365500ZS	DAP-147	DAP-24	3.51589	34.9555	19.2357	-3.3388	0.550357	-6.0666	1.30644e-09	6.28875e-08
BnaC07G0535300ZS	DAP-147	DAP-24	44.0836	0.27667	22.1801	6.82355	1.12493	6.06575	1.31342e-09	6.3143e-08
BnaC04G0162500ZS	DAP-147	DAP-24	0.203407	38.1545	19.1789	-7.37301	1.21565	-6.06509	1.3188e-09	6.3321e-08
BnaC04G0455900ZS	DAP-147	DAP-24	35.4972	1.87503	18.6861	4.21826	0.695657	6.06371	1.3302e-09	6.37266e-08
BnaC04G0557100ZS	DAP-147	DAP-24	105.451	293.74	199.596	-1.47715	0.243608	-6.06365	1.33063e-09	6.37266e-08
BnaC06G0430800ZS	DAP-147	DAP-24	10.962	48.1879	29.575	-2.14298	0.353761	-6.0577	1.38083e-09	6.59632e-08
BnaC06G0377900ZS	DAP-147	DAP-24	90.4526	31.9674	61.21	1.51714	0.25062	6.05353	1.41703e-09	6.76066e-08
BnaC08G0068500ZS	DAP-147	DAP-24	42.2243	7.50721	24.8658	2.47014	0.40834	6.04923	1.45537e-09	6.93479e-08
BnaC02G0459700ZS	DAP-147	DAP-24	54.6859	150.749	102.717	-1.46212	0.241782	-6.04728	1.47314e-09	7.0106e-08
BnaA06G0314600ZS	DAP-147	DAP-24	51.457	6.18421	28.8206	3.07527	0.508679	6.04559	1.48864e-09	7.07545e-08
BnaA06G0161600ZS	DAP-147	DAP-24	19.3343	82.8491	51.0917	-2.1071	0.348835	-6.04038	1.53747e-09	7.29835e-08
BnaA10G0194600ZS	DAP-147	DAP-24	51.1022	0.70932	25.9057	6.31463	1.04651	6.03397	1.59978e-09	7.58458e-08
BnaC03G0742000ZS	DAP-147	DAP-24	18.8364	72.6993	45.7679	-1.9555	0.324296	-6.02998	1.63983e-09	7.76468e-08
BnaC03G0649900ZS	DAP-147	DAP-24	69.7234	0.27667	35.0001	7.48426	1.24137	6.02905	1.64926e-09	7.79954e-08
BnaC03G0740700ZS	DAP-147	DAP-24	76.9024	190.84	133.871	-1.30663	0.216831	-6.02605	1.6802e-09	7.93587e-08
BnaC05G0433100ZS	DAP-147	DAP-24	2.24512	24.0891	13.1671	-3.41166	0.566581	-6.02148	1.72825e-09	8.15262e-08
BnaC05G0014200ZS	DAP-147	DAP-24	35.7681	100.236	68.0019	-1.48148	0.246152	-6.01856	1.75977e-09	8.29095e-08
BnaA10G0027500ZS	DAP-147	DAP-24	41.215	0	20.6075	7.44761	1.23749	6.01832	1.76241e-09	8.29299e-08
BnaA01G0014100ZS	DAP-147	DAP-24	0.406813	49.2399	24.8233	-7.02431	1.16741	-6.01699	1.77694e-09	8.35097e-08
BnaC06G0366800ZS	DAP-147	DAP-24	2.89512	27.4978	15.1965	-3.2733	0.544448	-6.01214	1.83089e-09	8.59376e-08
BnaA01G0096900ZS	DAP-147	DAP-24	0	18.604	9.30202	-7.05866	1.17421	-6.01142	1.839e-09	8.6211e-08
BnaA05G0001400ZS	DAP-147	DAP-24	40.7565	5.72205	23.2393	2.83022	0.470946	6.00964	1.85937e-09	8.70577e-08
BnaC07G0544800ZS	DAP-147	DAP-24	2.07732	24.5468	13.312	-3.56969	0.594954	-5.99994	1.97391e-09	9.23059e-08
BnaC05G0176400ZS	DAP-147	DAP-24	242.632	55.381	149.007	2.13667	0.356312	5.99662	2.01473e-09	9.40701e-08
BnaA05G0118600ZS	DAP-147	DAP-24	3.9227	46.4715	25.1971	-3.58838	0.598417	-5.99646	2.01663e-09	9.40701e-08
BnaC07G0374000ZS	DAP-147	DAP-24	138.526	16.0791	77.3024	3.11679	0.519979	5.99407	2.04658e-09	9.53493e-08
BnaC04G0305300ZS	DAP-147	DAP-24	12.5214	46.7352	29.6283	-1.89988	0.316994	-5.99342	2.05476e-09	9.56121e-08
BnaA10G0254400ZS	DAP-147	DAP-24	61.724	14.7975	38.2608	2.06885	0.345236	5.99258	2.06541e-09	9.59892e-08
BnaA10G0205400ZS	DAP-147	DAP-24	69.0204	10.4003	39.7103	2.70166	0.450887	5.99189	2.07419e-09	9.62786e-08
BnaA07G0021300ZS	DAP-147	DAP-24	52.1463	12.1232	32.1348	2.10443	0.351229	5.9916	2.07781e-09	9.63282e-08
BnaA01G0082700ZS	DAP-147	DAP-24	1.60616	39.0998	20.353	-4.66214	0.778712	-5.98699	2.13765e-09	9.89807e-08
BnaA03G0437700ZS	DAP-147	DAP-24	40.1506	1658.27	849.209	-5.37006	0.897264	-5.98493	2.16481e-09	1.00115e-07
BnaC02G0109900ZS	DAP-147	DAP-24	92.5824	21.069	56.8257	2.15208	0.359704	5.9829	2.19193e-09	1.01245e-07
BnaC03G0347700ZS	DAP-147	DAP-24	4.5153	33.6011	19.0582	-2.88252	0.481885	-5.98176	2.2074e-09	1.01658e-07
BnaC08G0314600ZS	DAP-147	DAP-24	64.7299	7.0213	35.8756	3.20201	0.535301	5.9817	2.20822e-09	1.01658e-07
BnaC09G0585600ZS	DAP-147	DAP-24	0.938844	22.2521	11.5955	-4.56305	0.762842	-5.98164	2.20896e-09	1.01658e-07
BnaC03G0427400ZS	DAP-147	DAP-24	0.203407	26.0053	13.1043	-6.81848	1.14062	-5.97788	2.26067e-09	1.03911e-07
BnaA06G0174300ZS	DAP-147	DAP-24	7.90267	34.7636	21.3331	-2.13545	0.357422	-5.97461	2.30646e-09	1.05782e-07
BnaC04G0350800ZS	DAP-147	DAP-24	41.0466	0.27667	20.6616	6.72085	1.12491	5.97457	2.307e-09	1.05782e-07
BnaC08G0196300ZS	DAP-147	DAP-24	1.51346	25.1472	13.3303	-4.05475	0.678823	-5.97321	2.3263e-09	1.06538e-07
BnaC03G0395900ZS	DAP-147	DAP-24	120.922	334.895	227.909	-1.46866	0.246013	-5.96985	2.37471e-09	1.08623e-07
BnaA03G0558000ZS	DAP-147	DAP-24	5.07917	30.541	17.8101	-2.57704	0.431858	-5.96734	2.41153e-09	1.10174e-07
BnaC03G0586800ZS	DAP-147	DAP-24	7.07813	84.2722	45.6751	-3.58923	0.601583	-5.96631	2.42683e-09	1.10738e-07
BnaA05G0145700ZS	DAP-147	DAP-24	67.5355	15.0858	41.3106	2.18088	0.365614	5.96497	2.44682e-09	1.11515e-07
BnaC04G0614600ZS	DAP-147	DAP-24	0	37.5616	18.7808	-8.07321	1.35355	-5.96446	2.45448e-09	1.11729e-07
BnaC05G0005700ZS	DAP-147	DAP-24	3.60529	26.5034	15.0543	-2.88947	0.484622	-5.96232	2.48674e-09	1.13061e-07
BnaA10G0048600ZS	DAP-147	DAP-24	33.5316	159.635	96.5834	-2.25423	0.37819	-5.96056	2.51375e-09	1.14151e-07
BnaA08G0007000ZS	DAP-147	DAP-24	0.203407	29.9481	15.0757	-7.02279	1.17897	-5.95672	2.57348e-09	1.16723e-07
BnaA09G0143900ZS	DAP-147	DAP-24	50.5974	7.65611	29.1268	2.72492	0.45752	5.95584	2.58733e-09	1.17211e-07
BnaC01G0185800ZS	DAP-147	DAP-24	73.8411	196.057	134.949	-1.41239	0.237165	-5.95529	2.59617e-09	1.1747e-07
BnaC08G0295700ZS	DAP-147	DAP-24	1.53475	23.0295	12.2821	-3.93138	0.660637	-5.9509	2.66679e-09	1.2052e-07
BnaA03G0076300ZS	DAP-147	DAP-24	67.5077	6.97894	37.2433	3.24	0.544659	5.94868	2.70319e-09	1.22019e-07
BnaA01G0037200ZS	DAP-147	DAP-24	0.949589	40.5953	20.7725	-5.43066	0.913107	-5.94746	2.72343e-09	1.22786e-07
BnaC04G0378100ZS	DAP-147	DAP-24	165.961	51.7445	108.853	1.68228	0.282916	5.9462	2.74446e-09	1.23554e-07
BnaA07G0086800ZS	DAP-147	DAP-24	907.361	4944.4	2925.88	-2.44613	0.411388	-5.94604	2.74703e-09	1.23554e-07
BnaC07G0466600ZS	DAP-147	DAP-24	33.2457	4.86252	19.0541	2.79029	0.469397	5.94441	2.7745e-09	1.24641e-07
Bnascaffold0157G0000100ZS	DAP-147	DAP-24	0.203407	26.634	13.4187	-6.85699	1.15428	-5.94047	2.84213e-09	1.27527e-07
BnaC08G0414800ZS	DAP-147	DAP-24	1.89521	23.1936	12.5444	-3.62042	0.609886	-5.93622	2.91661e-09	1.30713e-07
BnaA08G0205200ZS	DAP-147	DAP-24	29.7581	0	14.879	6.97518	1.17542	5.93422	2.95238e-09	1.32004e-07
BnaC05G0023600ZS	DAP-147	DAP-24	4.78665	133.709	69.2478	-4.82153	0.812495	-5.93422	2.95241e-09	1.32004e-07
BnaA02G0292400ZS	DAP-147	DAP-24	4.16141	36.091	20.1262	-3.11111	0.524383	-5.9329	2.97635e-09	1.32917e-07
BnaA06G0449300ZS	DAP-147	DAP-24	1201.62	2738.59	1970.11	-1.18851	0.200453	-5.92913	3.04535e-09	1.35837e-07
BnaC01G0247200ZS	DAP-147	DAP-24	59.8492	0.582857	30.216	6.55314	1.10536	5.92854	3.05645e-09	1.36171e-07
BnaA02G0217100ZS	DAP-147	DAP-24	1.72741	23.3362	12.5318	-3.77992	0.637625	-5.92812	3.06417e-09	1.36354e-07
BnaC02G0169600ZS	DAP-147	DAP-24	93.3649	33.4028	63.3839	1.48856	0.251154	5.92688	3.0875e-09	1.3723e-07
BnaA07G0086700ZS	DAP-147	DAP-24	1414.75	8796.52	5105.63	-2.63645	0.445091	-5.9234	3.15357e-09	1.40001e-07
BnaC03G0213000ZS	DAP-147	DAP-24	64.1388	5.18407	34.6614	3.64223	0.615121	5.92115	3.19695e-09	1.4176e-07
BnaC09G0618600ZS	DAP-147	DAP-24	40.8527	6.88646	23.8696	2.5937	0.438112	5.92017	3.21604e-09	1.42439e-07
BnaA01G0381200ZS	DAP-147	DAP-24	0.203407	26.6642	13.4338	-6.85842	1.15894	-5.91783	3.26218e-09	1.44313e-07
BnaA09G0541000ZS	DAP-147	DAP-24	61.5965	205.08	133.338	-1.73762	0.294269	-5.90488	3.52906e-09	1.55937e-07
BnaA03G0363700ZS	DAP-147	DAP-24	0.778018	24.3492	12.5636	-5.00491	0.848028	-5.90183	3.59496e-09	1.58662e-07
BnaA09G0717500ZS	DAP-147	DAP-24	3.64768	27.7186	15.6831	-2.93852	0.497979	-5.90088	3.61574e-09	1.59393e-07
BnaC03G0817000ZS	DAP-147	DAP-24	48.0653	10.5095	29.2874	2.18947	0.371195	5.89842	3.66989e-09	1.61591e-07
BnaA10G0171400ZS	DAP-147	DAP-24	0	22.2957	11.1479	-7.32866	1.24264	-5.89766	3.6869e-09	1.62121e-07
BnaC04G0405500ZS	DAP-147	DAP-24	7.25337	42.9533	25.1033	-2.56619	0.435133	-5.8975	3.69053e-09	1.62121e-07
BnaC07G0486900ZS	DAP-147	DAP-24	0	32.2053	16.1027	-7.85803	1.3331	-5.89454	3.75726e-09	1.6486e-07
BnaC03G0243000ZS	DAP-147	DAP-24	0	15.7385	7.86923	-6.82074	1.15737	-5.89331	3.78526e-09	1.65789e-07
BnaA02G0088500ZS	DAP-147	DAP-24	0.574611	27.0658	13.8202	-5.58505	0.947707	-5.89323	3.78722e-09	1.65789e-07
BnaC04G0041200ZS	DAP-147	DAP-24	2.35234	62.3004	32.3264	-4.75394	0.806713	-5.89298	3.79288e-09	1.65844e-07
BnaC08G0362900ZS	DAP-147	DAP-24	61.2925	9.18074	35.2366	2.7312	0.463683	5.89023	3.85653e-09	1.68432e-07
BnaC01G0502000ZS	DAP-147	DAP-24	131.161	329.387	230.274	-1.32777	0.225774	-5.88097	4.07868e-09	1.77928e-07
BnaA01G0295400ZS	DAP-147	DAP-24	10.7087	41.3451	26.0269	-1.94751	0.331624	-5.87264	4.28897e-09	1.86885e-07
BnaA09G0537700ZS	DAP-147	DAP-24	5.15079	38.7389	21.9449	-2.90939	0.495988	-5.86584	4.46853e-09	1.9426e-07
BnaA01G0002500ZS	DAP-147	DAP-24	16.1685	120.299	68.2338	-2.89393	0.493369	-5.86565	4.47368e-09	1.9426e-07
BnaA02G0361600ZS	DAP-147	DAP-24	10.647	69.7799	40.2135	-2.71349	0.462687	-5.86464	4.50121e-09	1.9523e-07
BnaA05G0349300ZS	DAP-147	DAP-24	16.4675	130.693	73.5801	-2.98348	0.508992	-5.86154	4.58604e-09	1.98681e-07
BnaA06G0442400ZS	DAP-147	DAP-24	81.8862	14.4913	48.1887	2.5054	0.427854	5.85574	4.74892e-09	2.05501e-07
BnaC08G0348100ZS	DAP-147	DAP-24	6.21087	30.4917	18.3513	-2.29625	0.392206	-5.85471	4.77843e-09	2.06541e-07
BnaC04G0386000ZS	DAP-147	DAP-24	369.754	121.93	245.842	1.59929	0.27337	5.85027	4.90784e-09	2.11892e-07
BnaA03G0267200ZS	DAP-147	DAP-24	0.203407	34.9109	17.5571	-7.24706	1.23882	-5.84996	4.91687e-09	2.12039e-07
BnaA09G0714900ZS	DAP-147	DAP-24	94.2745	28.5363	61.4054	1.72124	0.294587	5.84289	5.13024e-09	2.20987e-07
BnaC03G0534800ZS	DAP-147	DAP-24	10.8292	44.6646	27.7469	-2.04389	0.350018	-5.8394	5.23876e-09	2.25404e-07
BnaA01G0206200ZS	DAP-147	DAP-24	1.62725	85.1235	43.3754	-5.75293	0.986503	-5.83164	5.48858e-09	2.35884e-07
BnaA10G0163300ZS	DAP-147	DAP-24	0.203407	23.8663	12.0349	-6.70686	1.15021	-5.831	5.50965e-09	2.36401e-07
BnaA02G0187600ZS	DAP-147	DAP-24	1.153	20.8565	11.0048	-4.20355	0.720909	-5.83089	5.51316e-09	2.36401e-07
BnaA08G0113900ZS	DAP-147	DAP-24	636.718	249.961	443.34	1.35166	0.23207	5.82437	5.73275e-09	2.45538e-07
BnaA07G0095600ZS	DAP-147	DAP-24	17.7433	54.3761	36.0597	-1.61223	0.27711	-5.81803	5.95436e-09	2.5474e-07
BnaC03G0564900ZS	DAP-147	DAP-24	3.35456	34.3403	18.8474	-3.34927	0.57597	-5.815	6.06327e-09	2.59105e-07
BnaA03G0123500ZS	DAP-147	DAP-24	36.9033	3.78602	20.3447	3.36349	0.578868	5.81045	6.23038e-09	2.65945e-07
BnaA03G0521500ZS	DAP-147	DAP-24	15.7663	51.2485	33.5074	-1.70412	0.293326	-5.80965	6.26048e-09	2.66927e-07
BnaA05G0455600ZS	DAP-147	DAP-24	48.3142	10.6237	29.4689	2.16557	0.37285	5.80814	6.31703e-09	2.68839e-07
BnaC02G0266000ZS	DAP-147	DAP-24	0.178343	21.8315	11.0049	-6.56724	1.13071	-5.80807	6.31958e-09	2.68839e-07
BnaC09G0457900ZS	DAP-147	DAP-24	0	19.4057	9.70286	-7.12962	1.22805	-5.80564	6.41197e-09	2.72462e-07
BnaC08G0006500ZS	DAP-147	DAP-24	27.8787	84.8311	56.3549	-1.60928	0.277255	-5.80433	6.46248e-09	2.74299e-07
BnaA07G0161800ZS	DAP-147	DAP-24	0.385523	30.0552	15.2204	-6.31008	1.08791	-5.80019	6.62411e-09	2.80843e-07
Bnascaffold0027G0004600ZS	DAP-147	DAP-24	0.396268	29.3695	14.8829	-6.275	1.08192	-5.79985	6.6374e-09	2.8109e-07
BnaC03G0295200ZS	DAP-147	DAP-24	0	16.207	8.10352	-6.86127	1.18364	-5.79674	6.7616e-09	2.86028e-07
BnaC03G0570800ZS	DAP-147	DAP-24	16.9277	80.2798	48.6037	-2.25103	0.388356	-5.79631	6.77904e-09	2.86445e-07
BnaA07G0077800ZS	DAP-147	DAP-24	191.225	89.6914	140.458	1.09826	0.189527	5.79474	6.84281e-09	2.88816e-07
BnaC02G0026300ZS	DAP-147	DAP-24	15.9062	52.2412	34.0737	-1.71657	0.296322	-5.7929	6.91798e-09	2.91662e-07
BnaC07G0257400ZS	DAP-147	DAP-24	51.9719	126.383	89.1777	-1.28128	0.221209	-5.79217	6.94843e-09	2.92618e-07
BnaA05G0423700ZS	DAP-147	DAP-24	0.203407	24.3544	12.2789	-6.72472	1.16123	-5.79102	6.99592e-09	2.94289e-07
BnaA03G0063100ZS	DAP-147	DAP-24	0.203407	26.325	13.2642	-6.83588	1.18258	-5.7805	7.44801e-09	3.12957e-07
BnaC05G0103500ZS	DAP-147	DAP-24	2.10238	21.9375	12.0199	-3.39251	0.587228	-5.77717	7.59694e-09	3.1886e-07
BnaA09G0375500ZS	DAP-147	DAP-24	23.6222	63.3186	43.4704	-1.42305	0.246351	-5.7765	7.62697e-09	3.19764e-07
BnaC03G0647100ZS	DAP-147	DAP-24	1.76719	41.2534	21.5103	-4.5706	0.791754	-5.77276	7.79838e-09	3.26587e-07
BnaC03G0309900ZS	DAP-147	DAP-24	0	14.7519	7.37596	-6.72828	1.1657	-5.7719	7.8383e-09	3.27532e-07
BnaA09G0016700ZS	DAP-147	DAP-24	31.7871	261.15	146.469	-3.03874	0.527005	-5.76607	8.11435e-09	3.3858e-07
BnaC03G0258300ZS	DAP-147	DAP-24	10.2154	40.5498	25.3826	-1.98335	0.343977	-5.76593	8.12067e-09	3.3858e-07
BnaC09G0568300ZS	DAP-147	DAP-24	12.6719	50.9381	31.805	-2.0031	0.347423	-5.76561	8.13624e-09	3.38854e-07
BnaC05G0539100ZS	DAP-147	DAP-24	32.0546	3.16721	17.6109	3.33154	0.578232	5.76159	8.33231e-09	3.46637e-07
BnaA08G0281500ZS	DAP-147	DAP-24	205.013	100.88	152.947	1.03022	0.179141	5.75091	8.87666e-09	3.68786e-07
BnaA10G0137400ZS	DAP-147	DAP-24	47.011	6.0937	26.5524	2.99922	0.521542	5.75068	8.88869e-09	3.68786e-07
BnaC05G0480600ZS	DAP-147	DAP-24	0.203407	23.7715	11.9874	-6.68895	1.16318	-5.75057	8.89406e-09	3.68786e-07
BnaC08G0207900ZS	DAP-147	DAP-24	29.7849	95.5584	62.6716	-1.68797	0.293565	-5.74989	8.9302e-09	3.69877e-07
BnaA06G0271400ZS	DAP-147	DAP-24	39.3847	5.74449	22.5646	2.7797	0.483549	5.74853	9.00245e-09	3.7246e-07
BnaC06G0150000ZS	DAP-147	DAP-24	62.4441	15.7816	39.1128	1.99151	0.346487	5.74773	9.04474e-09	3.73799e-07
BnaC09G0063000ZS	DAP-147	DAP-24	2.44853	38.6176	20.533	-3.98545	0.693517	-5.74672	9.09911e-09	3.75635e-07
BnaC03G0095200ZS	DAP-147	DAP-24	0.203407	28.4991	14.3513	-6.95089	1.20969	-5.74602	9.13662e-09	3.76771e-07
BnaA09G0446600ZS	DAP-147	DAP-24	254.874	25.231	140.052	3.32637	0.578925	5.74576	9.15085e-09	3.76945e-07
BnaC03G0561600ZS	DAP-147	DAP-24	39.5876	0.948736	20.2682	5.36927	0.93463	5.7448	9.20287e-09	3.78674e-07
BnaA03G0141300ZS	DAP-147	DAP-24	77.6986	200.807	139.253	-1.3704	0.238562	-5.74444	9.22266e-09	3.78872e-07
BnaC05G0568800ZS	DAP-147	DAP-24	5.7252	30.1334	17.9293	-2.40958	0.419471	-5.74434	9.2278e-09	3.78872e-07
BnaC02G0385300ZS	DAP-147	DAP-24	1.32059	20.3538	10.8372	-3.94058	0.686308	-5.7417	9.37309e-09	3.84419e-07
BnaC03G0393700ZS	DAP-147	DAP-24	0	33.3155	16.6577	-7.89997	1.37621	-5.74038	9.44624e-09	3.86998e-07
BnaA01G0035100ZS	DAP-147	DAP-24	0	22.2269	11.1134	-7.32773	1.27695	-5.73845	9.55487e-09	3.91023e-07
BnaA07G0053100ZS	DAP-147	DAP-24	62.9546	1.87503	32.4148	5.05088	0.880741	5.73481	9.76226e-09	3.99077e-07
BnaC07G0343000ZS	DAP-147	DAP-24	45.8089	8.64984	27.2294	2.40715	0.419845	5.73341	9.84305e-09	4.01944e-07
BnaC02G0406000ZS	DAP-147	DAP-24	102.429	238.266	170.347	-1.21757	0.212403	-5.73236	9.9043e-09	4.03571e-07
BnaA05G0130700ZS	DAP-147	DAP-24	1.153	29.9401	15.5466	-4.70738	0.821853	-5.72776	1.01765e-08	4.14215e-07
BnaC01G0161700ZS	DAP-147	DAP-24	106.023	11.3651	58.6942	3.19083	0.557191	5.72664	1.02442e-08	4.1652e-07
BnaA06G0450200ZS	DAP-147	DAP-24	0.406813	29.2681	14.8375	-6.27802	1.09649	-5.72558	1.03083e-08	4.18674e-07
BnaA04G0298100ZS	DAP-147	DAP-24	206.486	419.384	312.935	-1.01982	0.178171	-5.72384	1.04143e-08	4.22357e-07
BnaC03G0305800ZS	DAP-147	DAP-24	51.2266	7.06041	29.1435	2.82911	0.494278	5.72372	1.04214e-08	4.22357e-07
BnaA02G0296100ZS	DAP-147	DAP-24	7.05683	62.6029	34.8299	-3.16682	0.553462	-5.72184	1.05374e-08	4.26599e-07
BnaA06G0187100ZS	DAP-147	DAP-24	50.5781	7.2299	28.904	2.83202	0.49504	5.72079	1.06028e-08	4.28787e-07
BnaC08G0527800ZS	DAP-147	DAP-24	125.28	22.3566	73.8183	2.48736	0.435124	5.71642	1.0879e-08	4.39203e-07
BnaC03G0357100ZS	DAP-147	DAP-24	4.04792	27.1448	15.5963	-2.76519	0.483733	-5.71635	1.08836e-08	4.39203e-07
BnaA06G0268600ZS	DAP-147	DAP-24	2.12367	22.1853	12.1545	-3.41275	0.597433	-5.71236	1.11418e-08	4.4914e-07
BnaA05G0097600ZS	DAP-147	DAP-24	0	14.5721	7.28604	-6.70723	1.17475	-5.7095	1.13312e-08	4.55799e-07
BnaA02G0412600ZS	DAP-147	DAP-24	12.39	45.1839	28.787	-1.87601	0.328612	-5.70889	1.13714e-08	4.56929e-07
BnaC06G0211400ZS	DAP-147	DAP-24	0	15.8522	7.92609	-6.84103	1.19881	-5.7065	1.15324e-08	4.62904e-07
BnaA10G0202400ZS	DAP-147	DAP-24	0	18.095	9.04752	-7.01858	1.23121	-5.70057	1.19405e-08	4.78774e-07
BnaA07G0020400ZS	DAP-147	DAP-24	14.1248	56.5894	35.3571	-2.01351	0.353329	-5.69868	1.20739e-08	4.8361e-07
BnaA08G0138800ZS	DAP-147	DAP-24	25.7312	0	12.8656	6.76878	1.18824	5.69647	1.22311e-08	4.89388e-07
BnaA02G0419000ZS	DAP-147	DAP-24	553.006	1561.86	1057.43	-1.49812	0.263046	-5.69527	1.23179e-08	4.92337e-07
BnaC03G0154600ZS	DAP-147	DAP-24	0.960134	22.2134	11.5868	-4.54467	0.798532	-5.69128	1.26087e-08	5.03428e-07
BnaA02G0163800ZS	DAP-147	DAP-24	1.12773	92.6098	46.8688	-6.35845	1.11828	-5.68592	1.30109e-08	5.18891e-07
BnaA06G0285000ZS	DAP-147	DAP-24	10.8907	48.3004	29.5955	-2.1608	0.380037	-5.68576	1.30235e-08	5.18891e-07
BnaA02G0345900ZS	DAP-147	DAP-24	1160.1	4680.25	2920.18	-2.01242	0.354071	-5.68365	1.31853e-08	5.2478e-07
BnaC04G0163400ZS	DAP-147	DAP-24	91.3339	9.83222	50.5831	3.19724	0.563018	5.67876	1.35671e-08	5.39407e-07
BnaA05G0165400ZS	DAP-147	DAP-24	2.07732	21.2583	11.6678	-3.35961	0.591837	-5.67659	1.37405e-08	5.45725e-07
BnaC08G0079500ZS	DAP-147	DAP-24	36.9183	7.99248	22.4554	2.20948	0.389298	5.67555	1.38247e-08	5.4849e-07
BnaC06G0120400ZS	DAP-147	DAP-24	49.4133	11.5488	30.481	2.07735	0.366416	5.66938	1.43315e-08	5.68e-07
BnaA08G0136900ZS	DAP-147	DAP-24	14.3064	53.4433	33.8748	-1.90772	0.336551	-5.66845	1.44096e-08	5.70494e-07
BnaC04G0035700ZS	DAP-147	DAP-24	0	17.4672	8.7336	-6.98225	1.23224	-5.66633	1.45891e-08	5.76999e-07
BnaA03G0548000ZS	DAP-147	DAP-24	0	18.1176	9.0588	-7.02034	1.23946	-5.66401	1.47873e-08	5.84221e-07
BnaA03G0208700ZS	DAP-147	DAP-24	2.60558	27.4181	15.0118	-3.39019	0.598643	-5.66313	1.48636e-08	5.86623e-07
BnaA03G0478000ZS	DAP-147	DAP-24	5.111	33.863	19.487	-2.73973	0.483972	-5.66093	1.50553e-08	5.93565e-07
BnaA03G0177600ZS	DAP-147	DAP-24	13.9346	77.2822	45.6084	-2.47355	0.436996	-5.66036	1.51057e-08	5.94929e-07
BnaA03G0278300ZS	DAP-147	DAP-24	41.6002	107.572	74.5863	-1.37472	0.242927	-5.65899	1.52262e-08	5.99051e-07
BnaA01G0388100ZS	DAP-147	DAP-24	2.01645	26.2132	14.1148	-3.67985	0.650372	-5.65807	1.53086e-08	6.01665e-07
BnaC06G0318800ZS	DAP-147	DAP-24	679.219	2228.11	1453.66	-1.71384	0.303289	-5.65084	1.59666e-08	6.26873e-07
BnaC06G0426600ZS	DAP-147	DAP-24	37.7295	2.14463	19.9371	4.096	0.724983	5.64978	1.60649e-08	6.30074e-07
BnaC04G0498800ZS	DAP-147	DAP-24	28.716	1.80826	15.2621	3.9192	0.694099	5.64646	1.63782e-08	6.41697e-07
BnaC08G0190500ZS	DAP-147	DAP-24	185.177	57.9578	121.567	1.68482	0.298689	5.64072	1.69339e-08	6.62779e-07
BnaA09G0400000ZS	DAP-147	DAP-24	7.49886	37.389	22.4439	-2.31	0.409817	-5.63667	1.73369e-08	6.77847e-07
BnaA10G0097700ZS	DAP-147	DAP-24	5.65001	39.8207	22.7353	-2.80675	0.498031	-5.63568	1.74369e-08	6.8105e-07
BnaA06G0076900ZS	DAP-147	DAP-24	3.58003	24.4474	14.0137	-2.76676	0.49096	-5.6354	1.74649e-08	6.81438e-07
BnaC07G0079900ZS	DAP-147	DAP-24	21.6561	131.274	76.4652	-2.60315	0.461971	-5.63488	1.75175e-08	6.82786e-07
BnaA07G0038800ZS	DAP-147	DAP-24	113.814	35.864	74.8389	1.65919	0.294496	5.63398	1.76095e-08	6.8566e-07
BnaC06G0156800ZS	DAP-147	DAP-24	342.244	1910.39	1126.32	-2.48129	0.440461	-5.63339	1.76698e-08	6.873e-07
BnaC03G0271500ZS	DAP-147	DAP-24	59.411	13.0855	36.2482	2.20256	0.391014	5.63294	1.77166e-08	6.88407e-07
BnaC06G0386100ZS	DAP-147	DAP-24	2.15948	27.9239	15.0417	-3.73261	0.662986	-5.63	1.8021e-08	6.99517e-07
BnaC09G0384700ZS	DAP-147	DAP-24	57.7178	17.9942	37.856	1.68725	0.299993	5.62429	1.86271e-08	7.223e-07
BnaA01G0350500ZS	DAP-147	DAP-24	21.4854	75.0183	48.2519	-1.80437	0.320832	-5.62401	1.86573e-08	7.22725e-07
BnaC09G0091600ZS	DAP-147	DAP-24	0.589129	23.1636	11.8763	-5.34501	0.950582	-5.62288	1.87797e-08	7.26622e-07
BnaA05G0097100ZS	DAP-147	DAP-24	2.03097	36.8127	19.4218	-4.15637	0.739208	-5.62273	1.87964e-08	7.26622e-07
BnaC09G0192300ZS	DAP-147	DAP-24	113.29	47.7227	80.5065	1.25506	0.223357	5.61905	1.92013e-08	7.41514e-07
BnaC01G0456100ZS	DAP-147	DAP-24	2.15948	24.4621	13.3108	-3.53769	0.630566	-5.61034	2.01929e-08	7.79008e-07
BnaA03G0270500ZS	DAP-147	DAP-24	67.2306	1.71905	34.4748	5.19556	0.926192	5.60959	2.02803e-08	7.8158e-07
BnaA06G0068800ZS	DAP-147	DAP-24	0	15.5421	7.77104	-6.79572	1.21155	-5.60914	2.03339e-08	7.82844e-07
BnaA09G0137800ZS	DAP-147	DAP-24	23.5974	79.1768	51.3871	-1.74636	0.311415	-5.60781	2.04904e-08	7.88066e-07
BnaC07G0537800ZS	DAP-147	DAP-24	0.203407	21.4939	10.8487	-6.54682	1.16783	-5.60597	2.07097e-08	7.95688e-07
BnaA04G0210700ZS	DAP-147	DAP-24	2.25944	22.161	12.2102	-3.28978	0.586908	-5.60528	2.07919e-08	7.98032e-07
BnaC09G0535000ZS	DAP-147	DAP-24	10.077	61.5733	35.8251	-2.62038	0.467553	-5.60446	2.08908e-08	8.01013e-07
BnaC03G0389300ZS	DAP-147	DAP-24	186.997	646.035	416.516	-1.78921	0.319304	-5.60346	2.10115e-08	8.04822e-07
BnaC03G0320000ZS	DAP-147	DAP-24	0.406813	40.021	20.2139	-6.71963	1.19927	-5.60311	2.10534e-08	8.0561e-07
BnaA02G0155800ZS	DAP-147	DAP-24	65.5755	159.562	112.569	-1.28442	0.229378	-5.59956	2.14898e-08	8.21473e-07
BnaC09G0529500ZS	DAP-147	DAP-24	0.61022	26.3	13.4551	-5.52276	0.986545	-5.59808	2.16734e-08	8.27652e-07
BnaC07G0145900ZS	DAP-147	DAP-24	0.599675	23.4595	12.0296	-5.35633	0.956909	-5.59753	2.17424e-08	8.29446e-07
BnaC07G0486500ZS	DAP-147	DAP-24	0	34.3817	17.1908	-7.94621	1.42016	-5.59527	2.20275e-08	8.39474e-07
BnaC03G0078600ZS	DAP-147	DAP-24	7.69956	38.0631	22.8813	-2.31649	0.414293	-5.59144	2.25195e-08	8.57357e-07
BnaA10G0053100ZS	DAP-147	DAP-24	145.662	572.047	358.854	-1.97361	0.353262	-5.58681	2.31273e-08	8.79607e-07
BnaA10G0233200ZS	DAP-147	DAP-24	33.2816	320.611	176.946	-3.26565	0.585013	-5.58219	2.37512e-08	9.02426e-07
BnaC07G0476300ZS	DAP-147	DAP-24	31.6961	137.67	84.6829	-2.1211	0.38016	-5.57949	2.41221e-08	9.15447e-07
BnaA10G0083400ZS	DAP-147	DAP-24	31.4051	5.0795	18.2423	2.62287	0.470103	5.57935	2.41425e-08	9.15447e-07
BnaA06G0105700ZS	DAP-147	DAP-24	186.133	78.8583	132.496	1.24404	0.223086	5.57651	2.45394e-08	9.29563e-07
BnaC02G0295100ZS	DAP-147	DAP-24	0.599675	22.8849	11.7423	-5.32423	0.955138	-5.5743	2.48528e-08	9.40489e-07
BnaC04G0089100ZS	DAP-147	DAP-24	84.5632	24.6669	54.615	1.76452	0.316741	5.57087	2.53473e-08	9.58241e-07
BnaC04G0084100ZS	DAP-147	DAP-24	148.326	32.899	90.6124	2.16692	0.389058	5.56965	2.55244e-08	9.63969e-07
BnaC05G0246600ZS	DAP-147	DAP-24	7.97479	57.6629	32.8189	-2.86728	0.514936	-5.56822	2.57348e-08	9.70941e-07
BnaC05G0048300ZS	DAP-147	DAP-24	440.104	1884.09	1162.1	-2.09819	0.376921	-5.56667	2.59649e-08	9.78643e-07
BnaA08G0000200ZS	DAP-147	DAP-24	67.4699	19.0027	43.2363	1.82174	0.327279	5.56632	2.60179e-08	9.79661e-07
BnaC09G0294400ZS	DAP-147	DAP-24	47.495	12.8557	30.1753	1.89227	0.339979	5.56584	2.60895e-08	9.80555e-07
BnaA07G0262900ZS	DAP-147	DAP-24	2.54501	27.3022	14.9236	-3.45747	0.621197	-5.56581	2.60937e-08	9.80555e-07
BnaA01G0137400ZS	DAP-147	DAP-24	1.32059	19.9906	10.6556	-3.92916	0.706155	-5.56416	2.63425e-08	9.88919e-07
BnaC02G0073800ZS	DAP-147	DAP-24	17.7374	63.1197	40.4286	-1.83136	0.32922	-5.56273	2.65593e-08	9.96065e-07
BnaC05G0260200ZS	DAP-147	DAP-24	38.7584	1.50915	20.1338	4.61765	0.830271	5.56162	2.6728e-08	1.0014e-06
BnaC01G0413900ZS	DAP-147	DAP-24	14.6374	53.5961	34.1167	-1.88191	0.338408	-5.56106	2.68139e-08	1.00362e-06
BnaA08G0017700ZS	DAP-147	DAP-24	142.986	50.2079	96.5971	1.50254	0.270299	5.55879	2.71649e-08	1.01575e-06
BnaC02G0072400ZS	DAP-147	DAP-24	0	13.237	6.6185	-6.57795	1.18357	-5.55772	2.73316e-08	1.02097e-06
BnaC07G0196400ZS	DAP-147	DAP-24	1.4133	43.8106	22.612	-5.00292	0.900633	-5.5549	2.77775e-08	1.03659e-06
BnaC09G0418900ZS	DAP-147	DAP-24	35.406	2.21847	18.8122	3.99035	0.718417	5.55436	2.78624e-08	1.03874e-06
BnaA10G0260300ZS	DAP-147	DAP-24	8.90539	36.0178	22.4616	-2.01581	0.362967	-5.5537	2.79684e-08	1.04166e-06
BnaC07G0063300ZS	DAP-147	DAP-24	2.13442	22.5795	12.357	-3.42764	0.617424	-5.55152	2.832e-08	1.05371e-06
BnaA03G0329500ZS	DAP-147	DAP-24	1.19935	26.8995	14.0494	-4.549	0.819667	-5.54981	2.85984e-08	1.06302e-06
BnaA03G0073600ZS	DAP-147	DAP-24	71.6331	14.542	43.0875	2.3055	0.415455	5.54933	2.86765e-08	1.06487e-06
BnaC01G0294000ZS	DAP-147	DAP-24	52.3828	10.071	31.2269	2.34214	0.422145	5.5482	2.88627e-08	1.07073e-06
BnaC05G0384700ZS	DAP-147	DAP-24	0.599675	21.9516	11.2757	-5.26385	0.949042	-5.54649	2.91459e-08	1.08017e-06
BnaA04G0160600ZS	DAP-147	DAP-24	30.5854	1.56885	16.0771	4.26635	0.769491	5.54438	2.95004e-08	1.09224e-06
BnaC09G0544300ZS	DAP-147	DAP-24	30.1149	3.23398	16.6744	3.23502	0.583852	5.54082	3.0106e-08	1.11357e-06
BnaC09G0446500ZS	DAP-147	DAP-24	0.813626	75.7795	38.2965	-6.59633	1.19059	-5.54038	3.01814e-08	1.11526e-06
BnaC09G0584200ZS	DAP-147	DAP-24	1.16354	19.1592	10.1614	-4.07383	0.73563	-5.53788	3.06162e-08	1.13022e-06
BnaC07G0084100ZS	DAP-147	DAP-24	118.328	0.948736	59.6383	6.955	1.25677	5.53405	3.12926e-08	1.15406e-06
BnaC04G0559100ZS	DAP-147	DAP-24	45.3723	0	22.6862	7.5859	1.37085	5.5337	3.13536e-08	1.15518e-06
BnaA06G0019700ZS	DAP-147	DAP-24	324.981	1370.17	847.577	-2.07614	0.375217	-5.53318	3.14476e-08	1.15661e-06
BnaC08G0508200ZS	DAP-147	DAP-24	0.182116	55.6631	27.9226	-7.92622	1.4325	-5.53315	3.14539e-08	1.15661e-06
BnaC08G0384800ZS	DAP-147	DAP-24	8.10608	32.866	20.4861	-2.01932	0.365467	-5.52531	3.28906e-08	1.20826e-06
BnaC04G0016400ZS	DAP-147	DAP-24	20.3094	202.735	111.522	-3.32359	0.601801	-5.52274	3.33759e-08	1.2249e-06
BnaC02G0354900ZS	DAP-147	DAP-24	0.563866	21.431	10.9974	-5.24851	0.950436	-5.52221	3.34755e-08	1.22736e-06
BnaC05G0132200ZS	DAP-147	DAP-24	390.3	3933.79	2162.04	-3.33346	0.603871	-5.52015	3.38719e-08	1.24069e-06
BnaC04G0328100ZS	DAP-147	DAP-24	125.971	391.246	258.608	-1.63597	0.296379	-5.51985	3.39287e-08	1.24156e-06
BnaA04G0092900ZS	DAP-147	DAP-24	0	13.6543	6.82714	-6.62015	1.19955	-5.51887	3.41178e-08	1.24727e-06
BnaC01G0364600ZS	DAP-147	DAP-24	7.64964	40.6608	24.1552	-2.41094	0.43692	-5.51803	3.42828e-08	1.25209e-06
BnaC05G0511400ZS	DAP-147	DAP-24	0.803081	21.3328	11.068	-4.80682	0.871162	-5.51771	3.43439e-08	1.2531e-06
BnaA09G0183400ZS	DAP-147	DAP-24	30.2181	4.42987	17.324	2.76181	0.500592	5.51708	3.44672e-08	1.25639e-06
BnaA08G0170900ZS	DAP-147	DAP-24	36.3103	4.33292	20.3216	3.03856	0.55096	5.51502	3.48738e-08	1.26998e-06
BnaA03G0379700ZS	DAP-147	DAP-24	18.9295	114.461	66.6955	-2.59933	0.471384	-5.51426	3.5025e-08	1.27425e-06
BnaC09G0094800ZS	DAP-147	DAP-24	1.71686	22.0024	11.8596	-3.68152	0.66783	-5.51266	3.53458e-08	1.28468e-06
BnaA05G0161100ZS	DAP-147	DAP-24	1.76322	22.8028	12.283	-3.72443	0.67566	-5.51229	3.54199e-08	1.28614e-06
BnaC04G0172900ZS	DAP-147	DAP-24	447.775	1253.07	850.421	-1.48473	0.269442	-5.51039	3.58031e-08	1.2988e-06
BnaC05G0187600ZS	DAP-147	DAP-24	42.5946	5.8851	24.2398	2.87421	0.521756	5.50873	3.61441e-08	1.30991e-06
BnaC05G0208400ZS	DAP-147	DAP-24	45.9261	114.874	80.4	-1.32523	0.240763	-5.50428	3.70675e-08	1.34209e-06
BnaC02G0056300ZS	DAP-147	DAP-24	108.178	239.541	173.86	-1.14717	0.20844	-5.50358	3.72147e-08	1.34612e-06
BnaA02G0272000ZS	DAP-147	DAP-24	92.402	24.2517	58.3268	1.9429	0.353135	5.50186	3.75813e-08	1.35808e-06
BnaC01G0153400ZS	DAP-147	DAP-24	47.6871	12.242	29.9645	1.96861	0.35788	5.50074	3.78201e-08	1.3654e-06
BnaC09G0578600ZS	DAP-147	DAP-24	51.3519	144.126	97.7388	-1.48957	0.270942	-5.49775	3.84661e-08	1.38739e-06
BnaC06G0121600ZS	DAP-147	DAP-24	14.1564	53.8043	33.9804	-1.93749	0.352632	-5.49435	3.92156e-08	1.41307e-06
BnaA10G0104500ZS	DAP-147	DAP-24	21.937	0	10.9685	6.53375	1.18938	5.49341	3.94239e-08	1.41922e-06
BnaC02G0386100ZS	DAP-147	DAP-24	5.46142	43.2278	24.3446	-3.00654	0.547386	-5.49254	3.96197e-08	1.42491e-06
BnaC06G0426400ZS	DAP-147	DAP-24	5.03561	29.3792	17.2074	-2.53952	0.462602	-5.48966	4.02712e-08	1.44696e-06
BnaA02G0258900ZS	DAP-147	DAP-24	131.582	436.12	283.851	-1.72887	0.314991	-5.48864	4.0503e-08	1.4539e-06
BnaA06G0016800ZS	DAP-147	DAP-24	48.1223	12.6972	30.4097	1.93934	0.353404	5.48759	4.07452e-08	1.46121e-06
BnaC03G0245900ZS	DAP-147	DAP-24	7.65271	33.8251	20.7389	-2.13981	0.389973	-5.48707	4.08656e-08	1.46354e-06
BnaC03G0205700ZS	DAP-147	DAP-24	0.731664	20.248	10.4898	-4.74426	0.86464	-5.48697	4.08881e-08	1.46354e-06
BnaA07G0074100ZS	DAP-147	DAP-24	11.1793	40.9632	26.0713	-1.87161	0.34116	-5.486	4.1113e-08	1.4702e-06
BnaA03G0543500ZS	DAP-147	DAP-24	0	22.6377	11.3189	-7.35373	1.34093	-5.48403	4.15742e-08	1.48528e-06
BnaC08G0248600ZS	DAP-147	DAP-24	72.9898	20.318	46.6539	1.83911	0.335397	5.48338	4.17284e-08	1.48938e-06
BnaC05G0042300ZS	DAP-147	DAP-24	22.6073	82.6047	52.606	-1.86662	0.340453	-5.48276	4.18746e-08	1.49319e-06
BnaC02G0357300ZS	DAP-147	DAP-24	193.409	23.6706	108.54	3.0185	0.550591	5.4823	4.19836e-08	1.49566e-06
BnaC03G0127800ZS	DAP-147	DAP-24	30.9022	3.67437	17.2883	3.11934	0.569324	5.47903	4.27656e-08	1.52207e-06
BnaA07G0143400ZS	DAP-147	DAP-24	0.985197	21.8008	11.393	-4.51138	0.823426	-5.47879	4.28247e-08	1.52274e-06
BnaA03G0566000ZS	DAP-147	DAP-24	1.77376	44.1572	22.9655	-4.6723	0.85308	-5.47697	4.32664e-08	1.537e-06
BnaC07G0105100ZS	DAP-147	DAP-24	67.8115	23.9395	45.8755	1.51272	0.276241	5.47609	4.34833e-08	1.54325e-06
BnaC01G0246400ZS	DAP-147	DAP-24	29.508	1.22541	15.3667	4.54005	0.829254	5.47487	4.37844e-08	1.55247e-06
BnaA05G0469100ZS	DAP-147	DAP-24	18.2164	66.3894	42.3029	-1.87367	0.342315	-5.47352	4.41176e-08	1.56151e-06
BnaA09G0065400ZS	DAP-147	DAP-24	0	16.0023	8.00113	-6.85492	1.25238	-5.4735	4.41221e-08	1.56151e-06
BnaC01G0465000ZS	DAP-147	DAP-24	41.2371	8.72554	24.9813	2.21942	0.405541	5.47273	4.43166e-08	1.56692e-06
BnaC01G0132100ZS	DAP-147	DAP-24	66.1329	248.496	157.314	-1.90698	0.348469	-5.47245	4.43854e-08	1.56788e-06
BnaC04G0223700ZS	DAP-147	DAP-24	3.59475	23.5141	13.5544	-2.70765	0.494966	-5.47038	4.49079e-08	1.58485e-06
BnaC01G0337300ZS	DAP-147	DAP-24	767.933	1993.85	1380.89	-1.37655	0.251664	-5.4698	4.5054e-08	1.58852e-06
BnaC08G0278000ZS	DAP-147	DAP-24	129.868	56.9006	93.3842	1.20169	0.219748	5.46848	4.53899e-08	1.59887e-06
BnaC01G0465300ZS	DAP-147	DAP-24	56.7156	235.93	146.323	-2.0587	0.376551	-5.46726	4.57035e-08	1.60841e-06
BnaA06G0407100ZS	DAP-147	DAP-24	2.37741	32.7897	17.5835	-3.82027	0.699007	-5.46528	4.62181e-08	1.625e-06
BnaA04G0101200ZS	DAP-147	DAP-24	6594.36	17228.9	11911.6	-1.38553	0.253568	-5.46413	4.65187e-08	1.63405e-06
BnaC05G0537900ZS	DAP-147	DAP-24	0.906808	22.0735	11.4902	-4.56001	0.834632	-5.4635	4.66835e-08	1.63831e-06
BnaC05G0442600ZS	DAP-147	DAP-24	56.1077	17.7554	36.9316	1.65516	0.303047	5.46173	4.71519e-08	1.65321e-06
BnaA06G0419000ZS	DAP-147	DAP-24	24.5225	65.1206	44.8216	-1.41398	0.259061	-5.45809	4.81296e-08	1.68592e-06
BnaC02G0552400ZS	DAP-147	DAP-24	3.29536	33.8951	18.5952	-3.37756	0.618852	-5.45779	4.821e-08	1.68717e-06
BnaC08G0214800ZS	DAP-147	DAP-24	60.2792	2.64535	31.4623	4.44619	0.81477	5.45699	4.84287e-08	1.69325e-06
BnaC01G0148400ZS	DAP-147	DAP-24	75.961	6.48397	41.2225	3.53122	0.647164	5.45645	4.85742e-08	1.69677e-06
BnaA08G0097800ZS	DAP-147	DAP-24	42.2672	10.987	26.6271	1.95351	0.358053	5.45592	4.8721e-08	1.70032e-06
BnaC01G0139400ZS	DAP-147	DAP-24	27.0738	3.29367	15.1837	3.07399	0.563923	5.45107	5.00667e-08	1.74567e-06
BnaA09G0445100ZS	DAP-147	DAP-24	0.203407	22.9433	11.5733	-6.65308	1.22059	-5.45069	5.01743e-08	1.7478e-06
BnaC08G0330500ZS	DAP-147	DAP-24	129.177	57.8956	93.5364	1.16639	0.214061	5.44885	5.06966e-08	1.76436e-06
BnaA01G0039200ZS	DAP-147	DAP-24	2.13819	24.0615	13.0999	-3.52693	0.647399	-5.44785	5.09815e-08	1.77264e-06
BnaC07G0283500ZS	DAP-147	DAP-24	2.2847	20.0631	11.1739	-3.14555	0.577579	-5.44611	5.14844e-08	1.78848e-06
BnaA05G0131500ZS	DAP-147	DAP-24	544.944	1389.81	967.375	-1.35072	0.248208	-5.44191	5.27137e-08	1.82949e-06
BnaA06G0447500ZS	DAP-147	DAP-24	1.3564	18.9365	10.1464	-3.83836	0.705436	-5.44112	5.29457e-08	1.83586e-06
BnaC03G0286700ZS	DAP-147	DAP-24	0.960134	21.5241	11.2421	-4.4957	0.826861	-5.43707	5.41647e-08	1.8764e-06
BnaC01G0166500ZS	DAP-147	DAP-24	0.960134	18.9263	9.9432	-4.31322	0.793481	-5.43582	5.45437e-08	1.88779e-06
BnaC06G0359500ZS	DAP-147	DAP-24	122.089	2.92202	62.5055	5.33668	0.982335	5.43264	5.5526e-08	1.92003e-06
BnaC06G0439500ZS	DAP-147	DAP-24	0	14.5304	7.26518	-6.71586	1.23707	-5.42886	5.67138e-08	1.95875e-06
BnaC04G0120800ZS	DAP-147	DAP-24	0.599675	20.2049	10.4023	-5.14649	0.948005	-5.42875	5.67496e-08	1.95875e-06
BnaA06G0083500ZS	DAP-147	DAP-24	10.6688	41.4678	26.0683	-1.95964	0.361102	-5.42682	5.73674e-08	1.97826e-06
BnaA04G0259200ZS	DAP-147	DAP-24	0.203407	27.3854	13.7944	-6.90759	1.27332	-5.42486	5.80009e-08	1.99827e-06
BnaA09G0000700ZS	DAP-147	DAP-24	4.17991	23.6488	13.9144	-2.50659	0.462162	-5.42362	5.84052e-08	2.01037e-06
BnaA03G0387200ZS	DAP-147	DAP-24	1478.31	5407.65	3442.98	-1.87104	0.345275	-5.41898	5.9941e-08	2.06135e-06
BnaC08G0455100ZS	DAP-147	DAP-24	134.131	389.125	261.628	-1.5363	0.28363	-5.41657	6.07536e-08	2.08739e-06
BnaA03G0337800ZS	DAP-147	DAP-24	0	45.5149	22.7575	-8.35772	1.54307	-5.41631	6.08427e-08	2.08854e-06
BnaA06G0417300ZS	DAP-147	DAP-24	4.38331	26.7243	15.5538	-2.60806	0.481734	-5.41391	6.1662e-08	2.11474e-06
BnaA09G0422500ZS	DAP-147	DAP-24	0.203407	16.6192	8.41131	-6.18019	1.14211	-5.41121	6.26004e-08	2.14497e-06
BnaC05G0406300ZS	DAP-147	DAP-24	0.970879	18.6605	9.81568	-4.3022	0.795107	-5.41084	6.27291e-08	2.14743e-06
BnaC03G0802500ZS	DAP-147	DAP-24	41.7625	11.3458	26.5541	1.89613	0.350484	5.41004	6.30092e-08	2.15506e-06
BnaC09G0424900ZS	DAP-147	DAP-24	26.4392	68.0779	47.2585	-1.36922	0.253104	-5.40972	6.3122e-08	2.15696e-06
BnaA09G0211900ZS	DAP-147	DAP-24	26.4745	0.27667	13.3756	6.08597	1.12512	5.40919	6.3312e-08	2.1615e-06
BnaC02G0105300ZS	DAP-147	DAP-24	74.2934	168.543	121.418	-1.18137	0.218476	-5.40731	6.39771e-08	2.18223e-06
BnaA03G0051900ZS	DAP-147	DAP-24	74.2318	172.198	123.215	-1.2124	0.224529	-5.39975	6.67329e-08	2.27417e-06
BnaC04G0472900ZS	DAP-147	DAP-24	6.80378	32.3897	19.5968	-2.25004	0.416722	-5.39937	6.68755e-08	2.27697e-06
BnaC04G0069100ZS	DAP-147	DAP-24	0	13.9546	6.97729	-6.65732	1.23344	-5.39736	6.76281e-08	2.30051e-06
BnaC07G0456300ZS	DAP-147	DAP-24	14.5195	106.025	60.2721	-2.86807	0.531733	-5.39382	6.89766e-08	2.34427e-06
BnaA07G0278600ZS	DAP-147	DAP-24	0	15.6365	7.81825	-6.82213	1.26491	-5.39338	6.91441e-08	2.34785e-06
Bnascaffold0308G0000400ZS	DAP-147	DAP-24	60.2698	171.782	116.026	-1.51082	0.280162	-5.39265	6.94277e-08	2.35535e-06
BnaC08G0050500ZS	DAP-147	DAP-24	39.0595	114.124	76.5917	-1.54588	0.286688	-5.39221	6.95967e-08	2.35897e-06
BnaC09G0189400ZS	DAP-147	DAP-24	2.49488	21.214	11.8544	-3.10191	0.575337	-5.39146	6.98864e-08	2.36666e-06
BnaA04G0231500ZS	DAP-147	DAP-24	10.1306	39.1029	24.6167	-1.95644	0.363326	-5.3848	7.2527e-08	2.45388e-06
BnaA02G0260000ZS	DAP-147	DAP-24	35.1684	3.36044	19.2644	3.4349	0.637909	5.38462	7.25969e-08	2.45404e-06
BnaC03G0492200ZS	DAP-147	DAP-24	39.5984	112.117	75.8575	-1.50239	0.27921	-5.38086	7.41305e-08	2.50363e-06
BnaA03G0185300ZS	DAP-147	DAP-24	1.71706	19.2715	10.4943	-3.49756	0.65005	-5.38045	7.4299e-08	2.50708e-06
BnaA05G0444800ZS	DAP-147	DAP-24	20.1688	119.142	69.6553	-2.5636	0.476555	-5.37944	7.47164e-08	2.5189e-06
BnaC09G0453300ZS	DAP-147	DAP-24	142.272	63.8069	103.039	1.1546	0.214676	5.37833	7.51813e-08	2.53231e-06
BnaC07G0174900ZS	DAP-147	DAP-24	1022.21	246.266	634.236	2.05141	0.381443	5.37802	7.53112e-08	2.53442e-06
BnaC08G0214400ZS	DAP-147	DAP-24	2.72355	25.1649	13.9442	-3.23563	0.601961	-5.37515	7.65175e-08	2.57272e-06
BnaC01G0347200ZS	DAP-147	DAP-24	37.11	6.40119	21.7556	2.53997	0.47272	5.37309	7.73978e-08	2.6e-06
BnaC09G0619400ZS	DAP-147	DAP-24	301.854	2018.01	1159.93	-2.74128	0.510239	-5.37255	7.76315e-08	2.60553e-06
BnaA09G0010000ZS	DAP-147	DAP-24	3.60152	21.9907	12.7961	-2.61598	0.487157	-5.36989	7.8784e-08	2.64115e-06
BnaA07G0030200ZS	DAP-147	DAP-24	18.8918	62.8197	40.8557	-1.72822	0.321842	-5.36978	7.88329e-08	2.64115e-06
BnaC05G0113300ZS	DAP-147	DAP-24	10.5021	59.4786	34.9903	-2.50574	0.466856	-5.36727	7.99393e-08	2.67584e-06
BnaC07G0055500ZS	DAP-147	DAP-24	8.78772	36.9795	22.8836	-2.07981	0.387557	-5.36646	8.02959e-08	2.68539e-06
BnaA06G0011300ZS	DAP-147	DAP-24	0	12.2645	6.13226	-6.45968	1.20384	-5.3659	8.05482e-08	2.69144e-06
BnaC03G0324900ZS	DAP-147	DAP-24	38.9257	1.16571	20.0457	4.95981	0.924397	5.36545	8.07489e-08	2.69575e-06
BnaC01G0494300ZS	DAP-147	DAP-24	0.203407	120.831	60.5171	-9.0431	1.68636	-5.36251	8.20726e-08	2.73752e-06
BnaC09G0225200ZS	DAP-147	DAP-24	32.0887	74.2376	53.1631	-1.20706	0.225146	-5.36123	8.26587e-08	2.75463e-06
BnaC04G0001500ZS	DAP-147	DAP-24	52.718	13.85	33.284	1.91463	0.357216	5.35987	8.32806e-08	2.77291e-06
BnaC05G0477700ZS	DAP-147	DAP-24	156.064	33.3389	94.7013	2.23703	0.417393	5.35954	8.34334e-08	2.77554e-06
BnaA10G0191500ZS	DAP-147	DAP-24	10.9153	87.1251	49.0202	-3.00668	0.561182	-5.35777	8.42571e-08	2.80047e-06
BnaC01G0177800ZS	DAP-147	DAP-24	5.0183	31.6296	18.324	-2.65092	0.494972	-5.3557	8.52276e-08	2.83023e-06
BnaC08G0144300ZS	DAP-147	DAP-24	14.4462	44.8623	29.6543	-1.63846	0.306003	-5.35439	8.58476e-08	2.84831e-06
BnaC05G0430800ZS	DAP-147	DAP-24	0.756728	20.512	10.6344	-4.76243	0.889509	-5.354	8.60304e-08	2.85031e-06
BnaA03G0374300ZS	DAP-147	DAP-24	104.419	11.6314	58.0252	3.14881	0.58813	5.35394	8.6059e-08	2.85031e-06
BnaA05G0386700ZS	DAP-147	DAP-24	2.95529	24.4422	13.6987	-3.0359	0.567163	-5.35278	8.66141e-08	2.86617e-06
BnaA04G0036300ZS	DAP-147	DAP-24	45.092	7.17847	26.1352	2.6318	0.491892	5.35037	8.77763e-08	2.90209e-06
BnaA10G0062500ZS	DAP-147	DAP-24	0.203407	17.7759	8.98966	-6.26827	1.17204	-5.34816	8.88537e-08	2.93513e-06
BnaC01G0490500ZS	DAP-147	DAP-24	0.781791	18.2626	9.52218	-4.58806	0.858164	-5.34637	8.97337e-08	2.9616e-06
BnaA06G0036700ZS	DAP-147	DAP-24	29.5973	4.24241	16.9199	2.82805	0.52908	5.34522	9.03075e-08	2.97794e-06
BnaA04G0048200ZS	DAP-147	DAP-24	6.71727	77.9392	42.3282	-3.55202	0.664684	-5.34392	9.09602e-08	2.99684e-06
BnaA03G0026800ZS	DAP-147	DAP-24	0	12.4377	6.21885	-6.48342	1.21385	-5.34121	9.23288e-08	3.03927e-06
BnaA01G0108300ZS	DAP-147	DAP-24	43.6167	172.969	108.293	-1.9855	0.371757	-5.34086	9.25085e-08	3.04253e-06
BnaA06G0452000ZS	DAP-147	DAP-24	0.960134	17.4704	9.21525	-4.20091	0.787611	-5.33373	9.6214e-08	3.15889e-06
BnaA07G0386200ZS	DAP-147	DAP-24	7.79595	31.2157	19.5058	-2.00954	0.376816	-5.33294	9.66361e-08	3.16998e-06
BnaC07G0547300ZS	DAP-147	DAP-24	0.396268	23.0383	11.7173	-5.93142	1.1123	-5.33259	9.68197e-08	3.17324e-06
BnaC01G0192000ZS	DAP-147	DAP-24	3.76912	22.6859	13.2275	-2.58782	0.485298	-5.33243	9.69065e-08	3.17333e-06
BnaA01G0105800ZS	DAP-147	DAP-24	12.959	62.391	37.675	-2.26815	0.425389	-5.33194	9.71674e-08	3.17911e-06
BnaC03G0172200ZS	DAP-147	DAP-24	0	13.7883	6.89414	-6.62478	1.24369	-5.32671	1.0001e-07	3.26929e-06
BnaA02G0074300ZS	DAP-147	DAP-24	35.1537	1.74857	18.4511	4.23349	0.794936	5.32557	1.00635e-07	3.28687e-06
BnaC05G0092200ZS	DAP-147	DAP-24	0	13.1368	6.56839	-6.55485	1.23118	-5.32403	1.01494e-07	3.31205e-06
BnaA07G0254700ZS	DAP-147	DAP-24	61.3152	161.824	111.57	-1.40131	0.263215	-5.32381	1.01618e-07	3.31323e-06
BnaC05G0238500ZS	DAP-147	DAP-24	31.8707	6.11744	18.9941	2.39209	0.449613	5.32034	1.03573e-07	3.37406e-06
BnaA03G0540900ZS	DAP-147	DAP-24	25.9047	0	12.9523	6.77824	1.2743	5.3192	1.04222e-07	3.39226e-06
BnaA01G0394900ZS	DAP-147	DAP-24	85.3418	4.83234	45.0871	4.14751	0.779872	5.3182	1.04802e-07	3.40818e-06
BnaC04G0346500ZS	DAP-147	DAP-24	0.781791	18.1277	9.45476	-4.57285	0.860461	-5.31442	1.06997e-07	3.47656e-06
BnaC07G0459700ZS	DAP-147	DAP-24	92.0954	225.807	158.951	-1.29671	0.244013	-5.31412	1.07174e-07	3.47933e-06
BnaC05G0353000ZS	DAP-147	DAP-24	87.6145	24.2329	55.9237	1.84749	0.347788	5.31211	1.08363e-07	3.51488e-06
BnaA03G0144200ZS	DAP-147	DAP-24	25.6103	1.56885	13.5896	4.00983	0.754975	5.3112	1.08905e-07	3.52934e-06
BnaA05G0082700ZS	DAP-147	DAP-24	29.0976	4.34066	16.7192	2.71247	0.510721	5.31105	1.08996e-07	3.52934e-06
BnaC04G0308700ZS	DAP-147	DAP-24	31.5207	4.05625	17.7885	2.93386	0.552463	5.31051	1.09319e-07	3.53676e-06
BnaA01G0102900ZS	DAP-147	DAP-24	39.3523	9.74693	24.5496	2.0305	0.382404	5.30984	1.09724e-07	3.54684e-06
BnaA06G0057800ZS	DAP-147	DAP-24	6.98889	29.697	18.3429	-2.08266	0.392823	-5.30178	1.14676e-07	3.70166e-06
BnaA09G0684200ZS	DAP-147	DAP-24	16.5005	50.4949	33.4977	-1.61675	0.304957	-5.30157	1.1481e-07	3.70166e-06
BnaA01G0402200ZS	DAP-147	DAP-24	75.243	29.2124	52.2277	1.36741	0.257931	5.30145	1.14884e-07	3.70166e-06
BnaA05G0392700ZS	DAP-147	DAP-24	8.18079	51.442	29.8114	-2.66707	0.503086	-5.30142	1.14906e-07	3.70166e-06
BnaA03G0472100ZS	DAP-147	DAP-24	1.14225	17.426	9.28414	-3.93688	0.742777	-5.30022	1.15662e-07	3.72281e-06
BnaA08G0289900ZS	DAP-147	DAP-24	14.1204	49.2222	31.6713	-1.80324	0.340337	-5.2984	1.16825e-07	3.75703e-06
BnaC01G0464700ZS	DAP-147	DAP-24	1.13848	16.8888	9.01364	-3.8988	0.736162	-5.29611	1.18295e-07	3.80107e-06
BnaA03G0494200ZS	DAP-147	DAP-24	24.8421	67.471	46.1565	-1.43534	0.271084	-5.29483	1.19126e-07	3.82451e-06
BnaA06G0389300ZS	DAP-147	DAP-24	55.9175	148.211	102.064	-1.40307	0.26502	-5.2942	1.19542e-07	3.83258e-06
BnaC09G0149900ZS	DAP-147	DAP-24	56.4422	194.539	125.491	-1.78441	0.337055	-5.29414	1.19581e-07	3.83258e-06
BnaC02G0101000ZS	DAP-147	DAP-24	0	11.4068	5.70342	-6.36124	1.20184	-5.29291	1.20382e-07	3.85499e-06
BnaA08G0071300ZS	DAP-147	DAP-24	29.058	2.42837	15.7432	3.52807	0.666728	5.29162	1.2124e-07	3.87915e-06
BnaA05G0328200ZS	DAP-147	DAP-24	38.4045	127.191	82.7977	-1.73268	0.327501	-5.29059	1.21921e-07	3.89766e-06
BnaC02G0100500ZS	DAP-147	DAP-24	29.6851	5.20596	17.4455	2.53104	0.478497	5.28956	1.22614e-07	3.91648e-06
BnaC02G0441900ZS	DAP-147	DAP-24	6.33282	31.4185	18.8757	-2.32608	0.439803	-5.28892	1.23041e-07	3.92679e-06
BnaC07G0439600ZS	DAP-147	DAP-24	120.431	12.9904	66.7109	3.20136	0.605669	5.28566	1.25252e-07	3.99357e-06
BnaA07G0267200ZS	DAP-147	DAP-24	0	16.7875	8.39376	-6.90829	1.30702	-5.28552	1.25345e-07	3.99357e-06
BnaA08G0231100ZS	DAP-147	DAP-24	4.9046	25.952	15.4283	-2.40728	0.455978	-5.27938	1.29618e-07	4.12622e-06
BnaA08G0208300ZS	DAP-147	DAP-24	0	11.9139	5.95694	-6.41843	1.21626	-5.27718	1.31187e-07	4.17262e-06
BnaC01G0367500ZS	DAP-147	DAP-24	28.4608	2.68838	15.5746	3.46127	0.655921	5.27697	1.31339e-07	4.17393e-06
BnaA01G0394800ZS	DAP-147	DAP-24	10.9757	53.2107	32.0932	-2.28541	0.433185	-5.27582	1.32164e-07	4.19663e-06
BnaA09G0513600ZS	DAP-147	DAP-24	26.8056	4.1532	15.4794	2.6906	0.510023	5.27545	1.32429e-07	4.20151e-06
BnaA09G0713200ZS	DAP-147	DAP-24	0.981425	21.9054	11.4434	-4.53074	0.859035	-5.27422	1.33323e-07	4.22632e-06
BnaC03G0073000ZS	DAP-147	DAP-24	26.9347	0.27667	13.6057	6.10955	1.15846	5.27386	1.33584e-07	4.23103e-06
BnaC03G0628000ZS	DAP-147	DAP-24	0.385523	22.6345	11.51	-5.90461	1.12013	-5.27136	1.35418e-07	4.28549e-06
BnaA10G0007500ZS	DAP-147	DAP-24	17.8725	50.5078	34.1902	-1.49273	0.283266	-5.2697	1.3665e-07	4.31778e-06
Bnascaffold0027G0006900ZS	DAP-147	DAP-24	0.203407	21.8993	11.0513	-6.57451	1.24761	-5.26967	1.36667e-07	4.31778e-06
BnaA08G0214700ZS	DAP-147	DAP-24	57.4721	4.51908	30.9956	3.67798	0.69813	5.26834	1.37665e-07	4.34566e-06
BnaA01G0428700ZS	DAP-147	DAP-24	150.325	74.5989	112.462	1.01076	0.191888	5.26746	1.38324e-07	4.36282e-06
BnaC04G0569400ZS	DAP-147	DAP-24	6.43934	28.3708	17.4051	-2.14968	0.408387	-5.26383	1.41086e-07	4.44621e-06
BnaC06G0078300ZS	DAP-147	DAP-24	2.26998	22.9917	12.6308	-3.34777	0.636052	-5.26335	1.41453e-07	4.45405e-06
BnaC03G0244900ZS	DAP-147	DAP-24	0	12.7959	6.39797	-6.53103	1.24095	-5.26293	1.41781e-07	4.46065e-06
BnaC01G0493600ZS	DAP-147	DAP-24	0	11.2194	5.60969	-6.33315	1.20346	-5.26247	1.42135e-07	4.4645e-06
BnaC07G0169900ZS	DAP-147	DAP-24	13.0518	56.9268	34.9893	-2.11353	0.401623	-5.26246	1.4214e-07	4.4645e-06
BnaC06G0109300ZS	DAP-147	DAP-24	4.56543	27.7521	16.1588	-2.61951	0.497827	-5.2619	1.42577e-07	4.47449e-06
BnaC09G0059600ZS	DAP-147	DAP-24	0	12.5321	6.26607	-6.4852	1.23274	-5.26081	1.43425e-07	4.49463e-06
BnaA06G0134800ZS	DAP-147	DAP-24	28.2783	0.27667	14.2775	6.17916	1.17457	5.26077	1.43457e-07	4.49463e-06
BnaC07G0258300ZS	DAP-147	DAP-24	5.73951	30.6682	18.2038	-2.42025	0.460086	-5.26042	1.43725e-07	4.4962e-06
BnaC09G0156900ZS	DAP-147	DAP-24	1.47387	19.2773	10.3756	-3.67515	0.698678	-5.26014	1.43942e-07	4.4962e-06
BnaA10G0281500ZS	DAP-147	DAP-24	33.8545	6.28247	20.0685	2.416	0.459305	5.26012	1.43963e-07	4.4962e-06
BnaC05G0120400ZS	DAP-147	DAP-24	21.6134	0.27667	10.945	5.79474	1.10164	5.26009	1.43984e-07	4.4962e-06
BnaA09G0437300ZS	DAP-147	DAP-24	36.5871	110.743	73.6651	-1.59148	0.302942	-5.2534	1.49313e-07	4.65874e-06
BnaA09G0428300ZS	DAP-147	DAP-24	38.8864	8.29866	23.5925	2.23016	0.424541	5.25312	1.49542e-07	4.66201e-06
BnaA03G0295400ZS	DAP-147	DAP-24	1.94156	20.0938	11.0177	-3.40071	0.647693	-5.2505	1.51688e-07	4.72503e-06
BnaA04G0265700ZS	DAP-147	DAP-24	9.87334	38.379	24.1261	-1.9488	0.371187	-5.25018	1.51948e-07	4.72922e-06
BnaC05G0396500ZS	DAP-147	DAP-24	0.756728	17.4183	9.08751	-4.52369	0.861868	-5.24871	1.53171e-07	4.76333e-06
BnaA09G0031300ZS	DAP-147	DAP-24	0.985197	34.2166	17.6009	-5.15894	0.98303	-5.248	1.53761e-07	4.77776e-06
BnaA02G0158300ZS	DAP-147	DAP-24	48.0794	13.2504	30.6649	1.87201	0.356772	5.24708	1.54531e-07	4.79773e-06
BnaA03G0208000ZS	DAP-147	DAP-24	0	13.9392	6.96961	-6.65507	1.2685	-5.2464	1.55099e-07	4.8114e-06
BnaA02G0063900ZS	DAP-147	DAP-24	7.58479	30.2362	18.9105	-1.99541	0.380452	-5.24484	1.5642e-07	4.84839e-06
Bnascaffold0026G0054200ZS	DAP-147	DAP-24	1.5809	25.4775	13.5292	-4.0501	0.772681	-5.24162	1.59174e-07	4.92969e-06
BnaA07G0051600ZS	DAP-147	DAP-24	110.379	222.173	166.276	-1.00734	0.192206	-5.24093	1.59773e-07	4.94419e-06
BnaA10G0088200ZS	DAP-147	DAP-24	0	11.7034	5.85172	-6.39017	1.2197	-5.23913	1.6134e-07	4.98855e-06
BnaC07G0302700ZS	DAP-147	DAP-24	44.4784	9.67428	27.0764	2.18372	0.416939	5.2375	1.62764e-07	5.02715e-06
BnaC04G0282100ZS	DAP-147	DAP-24	45.6311	14.1562	29.8936	1.67452	0.319723	5.2374	1.62855e-07	5.02715e-06
BnaC04G0403300ZS	DAP-147	DAP-24	92.0993	33.3943	62.7468	1.47971	0.282606	5.23596	1.6413e-07	5.0596e-06
BnaA02G0231200ZS	DAP-147	DAP-24	28.7413	73.9471	51.3442	-1.36172	0.260074	-5.23591	1.64174e-07	5.0596e-06
BnaC09G0504400ZS	DAP-147	DAP-24	32.6896	5.36249	19.026	2.65579	0.507329	5.23486	1.65109e-07	5.08426e-06
BnaA05G0012100ZS	DAP-147	DAP-24	1.54926	17.8305	9.68987	-3.55435	0.679118	-5.23377	1.66087e-07	5.10998e-06
BnaA09G0012100ZS	DAP-147	DAP-24	55.4982	151.231	103.365	-1.44641	0.276387	-5.23328	1.66528e-07	5.11484e-06
BnaA09G0687200ZS	DAP-147	DAP-24	42.6315	116.162	79.3966	-1.44916	0.27692	-5.23315	1.66645e-07	5.11484e-06
BnaC06G0274300ZS	DAP-147	DAP-24	32.8938	96.9339	64.9138	-1.56239	0.298606	-5.23227	1.67445e-07	5.1352e-06
BnaC06G0292700ZS	DAP-147	DAP-24	62.0755	19.2356	40.6556	1.68228	0.321563	5.23157	1.68077e-07	5.1504e-06
BnaA03G0474300ZS	DAP-147	DAP-24	43.2157	6.36394	24.7898	2.76273	0.528147	5.23098	1.68612e-07	5.16259e-06
BnaC06G0417100ZS	DAP-147	DAP-24	68.6437	148.522	108.583	-1.11638	0.213444	-5.23032	1.69219e-07	5.17699e-06
BnaC03G0069600ZS	DAP-147	DAP-24	22.7881	64.4018	43.5949	-1.50336	0.28747	-5.22963	1.69846e-07	5.19195e-06
BnaA03G0329000ZS	DAP-147	DAP-24	36.5453	92.2866	64.416	-1.33342	0.254989	-5.22931	1.70143e-07	5.1968e-06
BnaA03G0427200ZS	DAP-147	DAP-24	3.40519	140.663	72.0342	-5.3846	1.03001	-5.22772	1.7161e-07	5.23736e-06
BnaC09G0453600ZS	DAP-147	DAP-24	6.76072	42.0855	24.4231	-2.64535	0.506094	-5.227	1.72281e-07	5.25358e-06
BnaC08G0431600ZS	DAP-147	DAP-24	6.77851	30.7118	18.7452	-2.18619	0.418285	-5.22656	1.72693e-07	5.2619e-06
BnaA03G0421300ZS	DAP-147	DAP-24	43.5513	5.34909	24.4502	3.01652	0.577796	5.22074	1.78213e-07	5.42571e-06
BnaC04G0124400ZS	DAP-147	DAP-24	2.30599	21.2039	11.7549	-3.21053	0.615128	-5.21929	1.79607e-07	5.46373e-06
BnaC05G0156700ZS	DAP-147	DAP-24	8.12737	30.5436	19.3355	-1.91379	0.366703	-5.2189	1.79984e-07	5.4708e-06
BnaC04G0546800ZS	DAP-147	DAP-24	10.9444	43.672	27.3082	-2.00298	0.383844	-5.21822	1.80648e-07	5.48656e-06
BnaA09G0612200ZS	DAP-147	DAP-24	41.2602	98.3499	69.8051	-1.25318	0.240204	-5.21713	1.81715e-07	5.5145e-06
BnaC03G0110100ZS	DAP-147	DAP-24	2.29525	19.502	10.8986	-3.09251	0.592871	-5.21617	1.82664e-07	5.53885e-06
BnaA09G0228900ZS	DAP-147	DAP-24	82.8733	235.073	158.973	-1.50558	0.288668	-5.21563	1.83197e-07	5.55056e-06
BnaC09G0254100ZS	DAP-147	DAP-24	9.01589	33.0599	21.0379	-1.86801	0.35819	-5.21513	1.83692e-07	5.56106e-06
BnaA03G0257700ZS	DAP-147	DAP-24	24.7711	2.82377	13.7974	3.11412	0.597285	5.21378	1.85027e-07	5.59701e-06
BnaC02G0335000ZS	DAP-147	DAP-24	49.3647	125.36	87.3624	-1.34293	0.25763	-5.21262	1.86189e-07	5.62762e-06
BnaC08G0021600ZS	DAP-147	DAP-24	77.5553	20.0747	48.815	1.93212	0.370684	5.21232	1.86489e-07	5.63218e-06
BnaC03G0024000ZS	DAP-147	DAP-24	3.96178	24.136	14.0489	-2.61531	0.501967	-5.21013	1.88704e-07	5.6945e-06
BnaA06G0051800ZS	DAP-147	DAP-24	2.65193	23.0994	12.8757	-3.11528	0.598417	-5.20587	1.93089e-07	5.82218e-06
BnaC05G0219000ZS	DAP-147	DAP-24	6.95735	44.0887	25.523	-2.6708	0.513125	-5.20497	1.94023e-07	5.84332e-06
BnaA06G0186100ZS	DAP-147	DAP-24	2.11313	18.6207	10.3669	-3.15606	0.606364	-5.2049	1.941e-07	5.84332e-06
BnaC07G0217600ZS	DAP-147	DAP-24	71.6998	11.0486	41.3742	2.69387	0.517644	5.2041	1.94943e-07	5.86402e-06
BnaA02G0351400ZS	DAP-147	DAP-24	0	11.1295	5.56475	-6.32481	1.2156	-5.20306	1.96038e-07	5.89225e-06
BnaC05G0199000ZS	DAP-147	DAP-24	59.978	23.1924	41.5852	1.37871	0.265061	5.20146	1.97724e-07	5.93346e-06
BnaA01G0156400ZS	DAP-147	DAP-24	51.3393	103.27	77.3048	-1.00484	0.193191	-5.20131	1.97894e-07	5.93382e-06
BnaC01G0275000ZS	DAP-147	DAP-24	106.974	35.6321	71.3029	1.58591	0.304922	5.20104	1.9818e-07	5.93768e-06
BnaC09G0064500ZS	DAP-147	DAP-24	25.8667	0.365879	13.1163	6.0537	1.16422	5.1998	1.99506e-07	5.97265e-06
BnaA03G0251900ZS	DAP-147	DAP-24	373.202	1244.71	808.956	-1.7377	0.334317	-5.19777	2.01692e-07	6.03332e-06
BnaA03G0046700ZS	DAP-147	DAP-24	3.14488	40.4261	21.7855	-3.70409	0.71294	-5.19551	2.04163e-07	6.10238e-06
BnaA09G0385700ZS	DAP-147	DAP-24	11.4404	52.4895	31.965	-2.21092	0.425562	-5.19531	2.04379e-07	6.10399e-06
BnaA10G0176500ZS	DAP-147	DAP-24	48.8335	167.938	108.386	-1.78274	0.343482	-5.1902	2.10063e-07	6.26879e-06
BnaA04G0293800ZS	DAP-147	DAP-24	80.5643	14.0574	47.3109	2.52022	0.485756	5.18825	2.12284e-07	6.33006e-06
BnaA03G0100300ZS	DAP-147	DAP-24	3.22634	25.4044	14.3154	-2.98841	0.576176	-5.18663	2.14137e-07	6.38028e-06
BnaA01G0305500ZS	DAP-147	DAP-24	28.4666	3.65378	16.0602	2.91354	0.562184	5.18254	2.18886e-07	6.5166e-06
BnaC04G0142600ZS	DAP-147	DAP-24	2.49111	20.1607	11.3259	-3.03106	0.584878	-5.18238	2.19068e-07	6.51689e-06
BnaC01G0180300ZS	DAP-147	DAP-24	19.6015	0	9.80076	6.37186	1.2298	5.18121	2.20445e-07	6.55269e-06
BnaA01G0326600ZS	DAP-147	DAP-24	19.5772	61.0353	40.3062	-1.64802	0.318181	-5.1795	2.22479e-07	6.60793e-06
BnaA07G0146200ZS	DAP-147	DAP-24	44.6936	10.9935	27.8435	2.05918	0.397589	5.17918	2.22861e-07	6.61405e-06
BnaA03G0110700ZS	DAP-147	DAP-24	32.8435	6.33508	19.5893	2.36839	0.4574	5.17795	2.24339e-07	6.65269e-06
BnaA10G0287900ZS	DAP-147	DAP-24	9.5346	66.518	38.0263	-2.81099	0.542938	-5.17737	2.25031e-07	6.66797e-06
BnaA09G0420100ZS	DAP-147	DAP-24	63.849	204.687	134.268	-1.68142	0.324826	-5.17636	2.26257e-07	6.69677e-06
BnaC05G0431700ZS	DAP-147	DAP-24	7.95907	44.2767	26.1179	-2.47084	0.477339	-5.17628	2.26359e-07	6.69677e-06
BnaA06G0143300ZS	DAP-147	DAP-24	461.823	1759.35	1110.59	-1.92982	0.372841	-5.17598	2.26718e-07	6.70215e-06
BnaC06G0151500ZS	DAP-147	DAP-24	25.5228	84.6995	55.1112	-1.73338	0.334913	-5.17563	2.27139e-07	6.70932e-06
BnaC08G0414600ZS	DAP-147	DAP-24	29.957	4.30918	17.1331	2.83405	0.547639	5.17503	2.27869e-07	6.72561e-06
BnaC02G0106800ZS	DAP-147	DAP-24	1.30628	16.9871	9.14667	-3.69534	0.714142	-5.17452	2.28501e-07	6.739e-06
BnaA04G0059200ZS	DAP-147	DAP-24	16.1938	0	8.09688	6.10106	1.1796	5.17214	2.3143e-07	6.82005e-06
BnaC03G0077600ZS	DAP-147	DAP-24	2.86986	20.7859	11.8279	-2.86254	0.553659	-5.17022	2.3382e-07	6.8851e-06
BnaA03G0030300ZS	DAP-147	DAP-24	83.5895	203.586	143.588	-1.28568	0.248728	-5.16904	2.35299e-07	6.92321e-06
BnaC07G0115000ZS	DAP-147	DAP-24	5.39657	33.4894	19.443	-2.64058	0.511184	-5.16563	2.39632e-07	7.04522e-06
BnaA09G0145100ZS	DAP-147	DAP-24	0.182116	17.4035	8.79281	-6.23955	1.20803	-5.16506	2.40366e-07	7.06129e-06
BnaC06G0373100ZS	DAP-147	DAP-24	44.2762	0	22.1381	7.55049	1.46195	5.16468	2.4085e-07	7.07e-06
BnaA03G0144700ZS	DAP-147	DAP-24	12.2685	38.2453	25.2569	-1.64162	0.317882	-5.16426	2.41396e-07	7.0805e-06
BnaA02G0355000ZS	DAP-147	DAP-24	5.73971	28.091	16.9153	-2.29791	0.445192	-5.16162	2.44827e-07	7.17556e-06
BnaC02G0172700ZS	DAP-147	DAP-24	17.6241	89.4381	53.5311	-2.35116	0.455595	-5.16063	2.46121e-07	7.20789e-06
BnaA07G0081700ZS	DAP-147	DAP-24	19.6038	54.8845	37.2441	-1.48574	0.287908	-5.16047	2.4633e-07	7.20839e-06
BnaC02G0096900ZS	DAP-147	DAP-24	24.9535	61.1605	43.057	-1.29627	0.251228	-5.15973	2.47307e-07	7.23139e-06
BnaC02G0019500ZS	DAP-147	DAP-24	16.2014	45.5067	30.854	-1.49061	0.288908	-5.15948	2.47632e-07	7.23527e-06
BnaA05G0420600ZS	DAP-147	DAP-24	144.907	34.4738	89.6904	2.07556	0.402522	5.15639	2.51758e-07	7.35012e-06
BnaA09G0232800ZS	DAP-147	DAP-24	25.2029	1.56885	13.3859	3.9873	0.77373	5.15335	2.55877e-07	7.45977e-06
BnaA02G0287400ZS	DAP-147	DAP-24	38.2042	87.7487	62.9764	-1.19491	0.231871	-5.15332	2.55909e-07	7.45977e-06
BnaA06G0436200ZS	DAP-147	DAP-24	53.804	130.975	92.3893	-1.27768	0.248027	-5.15139	2.58569e-07	7.53146e-06
BnaA08G0171500ZS	DAP-147	DAP-24	0	10.6212	5.31058	-6.253	1.21406	-5.1505	2.59795e-07	7.56135e-06
BnaC08G0349500ZS	DAP-147	DAP-24	0.406813	22.9897	11.6982	-5.92388	1.15036	-5.14958	2.61075e-07	7.59273e-06
BnaC06G0364700ZS	DAP-147	DAP-24	55.7828	0.582857	28.1828	6.45739	1.25426	5.14836	2.62779e-07	7.6364e-06
BnaC07G0522900ZS	DAP-147	DAP-24	0	10.7033	5.35165	-6.26116	1.21641	-5.14725	2.64326e-07	7.67545e-06
BnaA08G0275600ZS	DAP-147	DAP-24	14.742	49.1431	31.9426	-1.74615	0.339277	-5.14668	2.65138e-07	7.69307e-06
Bnascaffold0025G0035900ZS	DAP-147	DAP-24	88.7436	0.948736	44.8462	6.54018	1.27079	5.14653	2.6535e-07	7.69331e-06
BnaC09G0292200ZS	DAP-147	DAP-24	69.4398	18.301	43.8704	1.92959	0.374955	5.14619	2.65833e-07	7.69548e-06
BnaC05G0426800ZS	DAP-147	DAP-24	10.4058	46.9146	28.6602	-2.18253	0.424162	-5.1455	2.66806e-07	7.71236e-06
BnaA03G0324000ZS	DAP-147	DAP-24	30.5347	4.16028	17.3475	2.87465	0.558674	5.14549	2.66825e-07	7.71236e-06
BnaC04G0592200ZS	DAP-147	DAP-24	23.7927	73.0287	48.4107	-1.61988	0.314893	-5.14424	2.68601e-07	7.75772e-06
BnaC01G0241100ZS	DAP-147	DAP-24	9.90888	34.5615	22.2352	-1.80927	0.351872	-5.14186	2.72038e-07	7.85097e-06
BnaA04G0245300ZS	DAP-147	DAP-24	1.36715	23.9961	12.6816	-4.1565	0.808652	-5.14004	2.74685e-07	7.92131e-06
BnaA08G0025200ZS	DAP-147	DAP-24	33.7069	7.92571	20.8163	2.08193	0.405056	5.13987	2.74935e-07	7.92247e-06
BnaC09G0308300ZS	DAP-147	DAP-24	27.4739	5.10194	16.2879	2.42852	0.472814	5.13631	2.80182e-07	8.06748e-06
BnaC04G0094200ZS	DAP-147	DAP-24	21.6612	74.42	48.0406	-1.78221	0.347024	-5.13571	2.81085e-07	8.08732e-06
BnaA02G0397900ZS	DAP-147	DAP-24	15.4092	0	7.7046	6.02515	1.17339	5.13481	2.82424e-07	8.11964e-06
BnaC03G0614300ZS	DAP-147	DAP-24	0.182116	17.8534	9.01778	-6.28782	1.22483	-5.13363	2.84209e-07	8.16473e-06
BnaC06G0022000ZS	DAP-147	DAP-24	71.139	25.7326	48.4358	1.4642	0.285375	5.13077	2.88557e-07	8.28161e-06
BnaC08G0373300ZS	DAP-147	DAP-24	0.960134	16.1653	8.56274	-4.09752	0.798633	-5.13067	2.88717e-07	8.28161e-06
BnaC08G0429400ZS	DAP-147	DAP-24	0	11.0858	5.54292	-6.31971	1.23211	-5.12918	2.91004e-07	8.34085e-06
BnaA10G0169000ZS	DAP-147	DAP-24	1.90972	17.7092	9.80948	-3.22226	0.628522	-5.12672	2.94832e-07	8.44416e-06
BnaA08G0248700ZS	DAP-147	DAP-24	0.178343	14.178	7.17817	-5.95624	1.16189	-5.12636	2.95403e-07	8.45409e-06
BnaC04G0003700ZS	DAP-147	DAP-24	79.2356	264.664	171.95	-1.74225	0.339982	-5.12453	2.98275e-07	8.5298e-06
BnaC02G0553400ZS	DAP-147	DAP-24	0	11.2779	5.63893	-6.33992	1.23721	-5.12438	2.98511e-07	8.53009e-06
BnaC03G0458000ZS	DAP-147	DAP-24	117.205	19.7888	68.4968	2.55533	0.498814	5.12282	3.00996e-07	8.59457e-06
BnaC03G0464800ZS	DAP-147	DAP-24	12.2325	38.6639	25.4482	-1.66253	0.324682	-5.12049	3.04735e-07	8.69474e-06
BnaC05G0194300ZS	DAP-147	DAP-24	0.203407	13.7813	6.99235	-5.90856	1.1542	-5.11916	3.06898e-07	8.74984e-06
BnaC02G0521300ZS	DAP-147	DAP-24	0	10.4279	5.21396	-6.23309	1.21835	-5.11599	3.12102e-07	8.89149e-06
BnaC06G0165500ZS	DAP-147	DAP-24	2.0089	24.938	13.4734	-3.61188	0.706267	-5.11404	3.15341e-07	8.97698e-06
BnaC01G0458600ZS	DAP-147	DAP-24	136.724	42.0771	89.4006	1.71382	0.335148	5.11363	3.16027e-07	8.9897e-06
BnaC09G0593800ZS	DAP-147	DAP-24	45.3582	3.63711	24.4976	3.66507	0.717199	5.11025	3.21735e-07	9.14519e-06
BnaC05G0078800ZS	DAP-147	DAP-24	0.203407	20.6857	10.4446	-6.48692	1.27051	-5.10577	3.29447e-07	9.35733e-06
BnaC01G0432300ZS	DAP-147	DAP-24	4.47929	52.5377	28.5085	-3.5532	0.696004	-5.10514	3.30545e-07	9.38145e-06
BnaA01G0093600ZS	DAP-147	DAP-24	55.5795	4.54282	30.0612	3.57942	0.701236	5.10445	3.31767e-07	9.40904e-06
BnaA04G0033400ZS	DAP-147	DAP-24	38.2649	126.822	82.5437	-1.73234	0.339394	-5.10421	3.32174e-07	9.41352e-06
BnaC09G0536500ZS	DAP-147	DAP-24	0.935071	16.0229	8.47897	-4.08647	0.800777	-5.10314	3.34071e-07	9.46016e-06
BnaC06G0191500ZS	DAP-147	DAP-24	566.324	1989.29	1277.81	-1.81276	0.355326	-5.10169	3.36642e-07	9.5258e-06
BnaC03G0604300ZS	DAP-147	DAP-24	3.4375	22.8316	13.1346	-2.73392	0.535992	-5.10067	3.38448e-07	9.56973e-06
BnaA01G0081000ZS	DAP-147	DAP-24	0	28.0482	14.0241	-7.65947	1.50174	-5.1004	3.38941e-07	9.57648e-06
BnaC06G0446600ZS	DAP-147	DAP-24	1299.78	3351.98	2325.88	-1.36688	0.268109	-5.09822	3.42865e-07	9.68009e-06
BnaA06G0385500ZS	DAP-147	DAP-24	25.4574	3.10044	14.2789	3.00709	0.589946	5.09724	3.44643e-07	9.72301e-06
BnaA02G0186600ZS	DAP-147	DAP-24	27.5519	3.75007	15.651	2.85401	0.560012	5.09633	3.46302e-07	9.76251e-06
BnaC08G0287700ZS	DAP-147	DAP-24	30.1399	3.00938	16.5746	3.37039	0.66201	5.09115	3.5589e-07	1.00253e-05
BnaC04G0104800ZS	DAP-147	DAP-24	0	10.5551	5.27753	-6.24575	1.22709	-5.08988	3.58297e-07	1.00785e-05
BnaA02G0046600ZS	DAP-147	DAP-24	0.203407	18.1324	9.16791	-6.30001	1.23783	-5.08956	3.58896e-07	1.00874e-05
BnaC05G0468100ZS	DAP-147	DAP-24	1.29553	19.6053	10.4504	-3.89865	0.766561	-5.0859	3.65895e-07	1.02764e-05
BnaA02G0305800ZS	DAP-147	DAP-24	38.8857	83.6569	61.2713	-1.10166	0.216644	-5.08512	3.67394e-07	1.03108e-05
BnaA07G0157000ZS	DAP-147	DAP-24	33.7236	4.63977	19.1817	2.83528	0.557755	5.08338	3.70781e-07	1.03982e-05
BnaC04G0606600ZS	DAP-147	DAP-24	22.3336	2.27817	12.3059	3.31535	0.652483	5.08113	3.75204e-07	1.05143e-05
BnaC03G0360300ZS	DAP-147	DAP-24	46.7547	6.58735	26.671	2.85137	0.561216	5.0807	3.76056e-07	1.05304e-05
BnaA09G0386600ZS	DAP-147	DAP-24	2.89115	20.0265	11.4588	-2.81508	0.554225	-5.07931	3.78818e-07	1.0598e-05
BnaA06G0081000ZS	DAP-147	DAP-24	24.8599	1.97906	13.4195	3.69002	0.726497	5.0792	3.79034e-07	1.0598e-05
BnaC06G0050900ZS	DAP-147	DAP-24	8.79169	38.4933	23.6425	-2.14552	0.422555	-5.07749	3.8246e-07	1.06859e-05
BnaA10G0032900ZS	DAP-147	DAP-24	45.6294	8.05217	26.8408	2.51172	0.494761	5.07664	3.84164e-07	1.07256e-05
BnaA07G0037100ZS	DAP-147	DAP-24	13.9029	63.1459	38.5244	-2.17987	0.429466	-5.07577	3.85926e-07	1.07668e-05
BnaC03G0087200ZS	DAP-147	DAP-24	50.2136	4.63269	27.4231	3.41798	0.673554	5.07454	3.8843e-07	1.08286e-05
BnaA03G0060700ZS	DAP-147	DAP-24	0	18.6607	9.33035	-7.06236	1.39243	-5.07199	3.93682e-07	1.0967e-05
BnaA05G0084900ZS	DAP-147	DAP-24	5.88245	38.2676	22.075	-2.71003	0.534423	-5.07093	3.95872e-07	1.10168e-05
BnaC06G0014100ZS	DAP-147	DAP-24	0.203407	13.4822	6.8428	-5.87643	1.15887	-5.07084	3.96057e-07	1.10168e-05
BnaA02G0036100ZS	DAP-147	DAP-24	0	11.5101	5.75504	-6.37145	1.25681	-5.06955	3.98747e-07	1.10835e-05
BnaA02G0302700ZS	DAP-147	DAP-24	43.53	12.1309	27.8304	1.8409	0.363279	5.06745	4.03177e-07	1.11983e-05
BnaA08G0038700ZS	DAP-147	DAP-24	83.0248	247.544	165.284	-1.57615	0.311046	-5.06727	4.03554e-07	1.12006e-05
BnaA01G0403300ZS	DAP-147	DAP-24	4.71871	22.6109	13.6648	-2.26254	0.446659	-5.06547	4.07397e-07	1.12989e-05
BnaC03G0250800ZS	DAP-147	DAP-24	36.1444	0.582857	18.3636	5.82377	1.14987	5.06475	4.08946e-07	1.13335e-05
BnaC03G0246200ZS	DAP-147	DAP-24	207.082	431.182	319.132	-1.05824	0.208963	-5.06425	4.10014e-07	1.13548e-05
BnaC06G0417300ZS	DAP-147	DAP-24	6.58468	34.1158	20.3502	-2.37798	0.469644	-5.06338	4.11891e-07	1.13984e-05
BnaA02G0327400ZS	DAP-147	DAP-24	1.12793	15.56	8.34399	-3.78428	0.74749	-5.06265	4.13476e-07	1.14338e-05
BnaA09G0049400ZS	DAP-147	DAP-24	47.9649	7.37944	27.6722	2.70543	0.534424	5.06233	4.14163e-07	1.14444e-05
BnaC04G0461800ZS	DAP-147	DAP-24	30.7974	68.6246	49.711	-1.157	0.228573	-5.06183	4.15252e-07	1.14591e-05
BnaA10G0008600ZS	DAP-147	DAP-24	26.6528	0.582857	13.6178	5.38384	1.06362	5.06181	4.15303e-07	1.14591e-05
BnaC07G0455700ZS	DAP-147	DAP-24	42.1927	96.4297	69.3112	-1.18852	0.234942	-5.05876	4.21987e-07	1.1635e-05
BnaC07G0407100ZS	DAP-147	DAP-24	6.79853	42.3184	24.5585	-2.62759	0.519677	-5.0562	4.27686e-07	1.17836e-05
BnaA01G0148300ZS	DAP-147	DAP-24	1.48839	18.104	9.79619	-3.57824	0.708171	-5.0528	4.35384e-07	1.19869e-05
BnaC03G0586600ZS	DAP-147	DAP-24	126.298	342.579	234.439	-1.43801	0.284692	-5.05112	4.39228e-07	1.20839e-05
BnaA08G0318400ZS	DAP-147	DAP-24	32.5484	94.7205	63.6345	-1.54501	0.305919	-5.05039	4.40906e-07	1.21212e-05
BnaC03G0339800ZS	DAP-147	DAP-24	0.981425	17.3729	9.17715	-4.18811	0.829359	-5.04981	4.42246e-07	1.21436e-05
BnaC04G0521700ZS	DAP-147	DAP-24	1.31682	17.2046	9.2607	-3.71262	0.735206	-5.04976	4.42364e-07	1.21436e-05
BnaC01G0350900ZS	DAP-147	DAP-24	0	13.1714	6.58571	-6.57478	1.30232	-5.04851	4.4526e-07	1.22142e-05
BnaC03G0780800ZS	DAP-147	DAP-24	102.606	41.471	72.0385	1.30957	0.259466	5.04716	4.48423e-07	1.22831e-05
BnaC08G0262600ZS	DAP-147	DAP-24	4.5121	23.1475	13.8298	-2.35227	0.46675	-5.03967	4.66327e-07	1.27487e-05
BnaC09G0621900ZS	DAP-147	DAP-24	0.960134	23.3151	12.1376	-4.609	0.914552	-5.03963	4.66435e-07	1.27487e-05
BnaA06G0102000ZS	DAP-147	DAP-24	0.563866	16.485	8.52445	-4.85957	0.964271	-5.03963	4.66437e-07	1.27487e-05
BnaC07G0134500ZS	DAP-147	DAP-24	354.911	2444.85	1399.88	-2.78445	0.552685	-5.03804	4.7032e-07	1.28455e-05
BnaA04G0297500ZS	DAP-147	DAP-24	0.406813	29.0139	14.7104	-6.24933	1.24058	-5.03744	4.71799e-07	1.28766e-05
BnaA03G0228700ZS	DAP-147	DAP-24	22.2094	2.21847	12.2139	3.31203	0.657684	5.0359	4.75611e-07	1.29619e-05
BnaA02G0399800ZS	DAP-147	DAP-24	56.4184	148.08	102.249	-1.39011	0.27605	-5.03572	4.76063e-07	1.29648e-05
BnaC09G0151800ZS	DAP-147	DAP-24	0	12.3671	6.18356	-6.46466	1.28382	-5.03549	4.76619e-07	1.29706e-05
BnaA03G0182000ZS	DAP-147	DAP-24	32.8593	0.948736	16.904	5.10534	1.01437	5.03302	4.82825e-07	1.313e-05
BnaC05G0022000ZS	DAP-147	DAP-24	28.531	77.2984	52.9147	-1.43612	0.285464	-5.03084	4.88336e-07	1.32703e-05
BnaA01G0203500ZS	DAP-147	DAP-24	83.511	33.4033	58.4571	1.33357	0.265151	5.02945	4.91884e-07	1.33571e-05
BnaA05G0359500ZS	DAP-147	DAP-24	0.960134	16.1699	8.56502	-4.08967	0.813208	-5.02905	4.92905e-07	1.33752e-05
BnaA08G0174500ZS	DAP-147	DAP-24	167.343	420.924	294.134	-1.33124	0.264801	-5.02733	4.9735e-07	1.34802e-05
BnaC07G0297300ZS	DAP-147	DAP-24	23.3272	71.5613	47.4442	-1.62517	0.323271	-5.02728	4.97492e-07	1.34802e-05
BnaC07G0456200ZS	DAP-147	DAP-24	13.8355	0	6.91776	5.87359	1.16907	5.02416	5.05652e-07	1.36915e-05
BnaC03G0381100ZS	DAP-147	DAP-24	4.25432	25.8821	15.0682	-2.62451	0.522458	-5.02339	5.0766e-07	1.3736e-05
BnaA01G0314600ZS	DAP-147	DAP-24	0	14.5848	7.29242	-6.70309	1.33497	-5.02115	5.13634e-07	1.38876e-05
BnaC09G0532000ZS	DAP-147	DAP-24	116.508	248.648	182.578	-1.09328	0.217809	-5.01943	5.18243e-07	1.40022e-05
BnaA02G0073800ZS	DAP-147	DAP-24	1.73138	16.7463	9.23886	-3.29057	0.655877	-5.01705	5.24715e-07	1.41669e-05
BnaC07G0546400ZS	DAP-147	DAP-24	971.968	2132.79	1552.38	-1.13364	0.226006	-5.01597	5.27656e-07	1.42361e-05
BnaC07G0549300ZS	DAP-147	DAP-24	0.781791	15.8585	8.32014	-4.38756	0.874971	-5.01452	5.31663e-07	1.4334e-05
BnaA09G0028000ZS	DAP-147	DAP-24	53.6144	141.451	97.5329	-1.40061	0.27934	-5.01401	5.33069e-07	1.43616e-05
BnaA05G0181000ZS	DAP-147	DAP-24	0	12.8844	6.44221	-6.52671	1.3025	-5.01091	5.41728e-07	1.45845e-05
BnaA01G0367200ZS	DAP-147	DAP-24	43.8558	11.5686	27.7122	1.95283	0.389904	5.00848	5.48619e-07	1.47594e-05
BnaC03G0755800ZS	DAP-147	DAP-24	12.5819	50.0258	31.3038	-1.98843	0.397355	-5.00417	5.61024e-07	1.50824e-05
BnaC07G0333900ZS	DAP-147	DAP-24	2.81953	21.9785	12.399	-2.97067	0.593744	-5.00329	5.63613e-07	1.51412e-05
BnaC01G0182000ZS	DAP-147	DAP-24	57.711	6.17267	31.9418	3.17533	0.63495	5.00091	5.70606e-07	1.53182e-05
BnaC02G0157200ZS	DAP-147	DAP-24	120.689	55.7634	88.226	1.12152	0.224306	4.99998	5.73353e-07	1.53694e-05
BnaA03G0501600ZS	DAP-147	DAP-24	13.9921	39.9843	26.9882	-1.51562	0.303128	-4.99994	5.73477e-07	1.53694e-05
BnaC03G0356500ZS	DAP-147	DAP-24	7.55653	31.0231	19.2898	-2.04727	0.409467	-4.99985	5.73739e-07	1.53694e-05
BnaA09G0613500ZS	DAP-147	DAP-24	14.8282	43.9143	29.3712	-1.57346	0.314713	-4.99967	5.74274e-07	1.53728e-05
BnaA06G0050000ZS	DAP-147	DAP-24	121.627	332.915	227.271	-1.45287	0.290627	-4.9991	5.75976e-07	1.54035e-05
BnaC08G0241500ZS	DAP-147	DAP-24	24.5207	0	12.2603	6.6989	1.34004	4.99902	5.76236e-07	1.54035e-05
BnaA05G0494200ZS	DAP-147	DAP-24	0.574611	17.3196	8.94711	-4.92454	0.985829	-4.99533	5.87345e-07	1.56893e-05
BnaC05G0431900ZS	DAP-147	DAP-24	2.84479	20.4013	11.6231	-2.8472	0.570011	-4.99499	5.88377e-07	1.5695e-05
BnaC08G0161200ZS	DAP-147	DAP-24	6.13531	69.8455	37.9904	-3.52549	0.70581	-4.99495	5.88496e-07	1.5695e-05
BnaC04G0259800ZS	DAP-147	DAP-24	50.9647	18.9886	34.9766	1.41569	0.283429	4.99485	5.88808e-07	1.5695e-05
BnaA05G0459000ZS	DAP-147	DAP-24	3.16597	37.2832	20.2246	-3.58403	0.718219	-4.99016	6.03284e-07	1.60623e-05
BnaC06G0328000ZS	DAP-147	DAP-24	54.8543	14.7853	34.8198	1.86706	0.374152	4.99011	6.03438e-07	1.60623e-05
BnaC03G0792600ZS	DAP-147	DAP-24	169.981	73.6263	121.804	1.211	0.242821	4.98722	6.12543e-07	1.62885e-05
BnaC05G0143900ZS	DAP-147	DAP-24	286.529	108.903	197.716	1.4009	0.280904	4.98714	6.12803e-07	1.62885e-05
BnaC07G0065200ZS	DAP-147	DAP-24	42.6635	10.8375	26.7505	1.99946	0.400982	4.98641	6.15117e-07	1.63385e-05
BnaA05G0324300ZS	DAP-147	DAP-24	13.1181	0	6.55905	5.79266	1.16194	4.98535	6.18512e-07	1.64171e-05
BnaA01G0072900ZS	DAP-147	DAP-24	2.2845	19.909	11.0967	-3.14168	0.630267	-4.98468	6.20656e-07	1.64515e-05
BnaC01G0323300ZS	DAP-147	DAP-24	36.641	86.1204	61.3807	-1.23513	0.247785	-4.98467	6.2068e-07	1.64515e-05
BnaA04G0010300ZS	DAP-147	DAP-24	11.7184	46.3751	29.0468	-1.98238	0.39776	-4.98385	6.23303e-07	1.65094e-05
BnaC07G0269800ZS	DAP-147	DAP-24	17.2654	51.7705	34.5179	-1.59013	0.319421	-4.97818	6.41857e-07	1.69868e-05
BnaA03G0009400ZS	DAP-147	DAP-24	12.6012	65.9053	39.2532	-2.38581	0.479265	-4.97807	6.42229e-07	1.69868e-05
BnaA04G0218100ZS	DAP-147	DAP-24	183.18	413.531	298.356	-1.17433	0.235934	-4.97736	6.44567e-07	1.70367e-05
BnaC03G0078000ZS	DAP-147	DAP-24	0	10.8067	5.40333	-6.27373	1.26056	-4.97694	6.45978e-07	1.70621e-05
BnaC08G0419600ZS	DAP-147	DAP-24	0.203407	13.7646	6.98402	-5.89979	1.18549	-4.97665	6.46951e-07	1.70758e-05
BnaC01G0377900ZS	DAP-147	DAP-24	25.4998	3.6833	14.5915	2.75032	0.552816	4.97511	6.52091e-07	1.71994e-05
BnaA01G0196200ZS	DAP-147	DAP-24	27.2152	1.29218	14.2537	4.41268	0.887005	4.97481	6.53113e-07	1.72143e-05
Bnascaffold0026G0068100ZS	DAP-147	DAP-24	95.0709	192.057	143.564	-1.01223	0.203524	-4.97353	6.5745e-07	1.73165e-05
BnaC07G0473400ZS	DAP-147	DAP-24	20.3893	52.8689	36.6291	-1.36986	0.275492	-4.97243	6.61194e-07	1.7403e-05
BnaC02G0092500ZS	DAP-147	DAP-24	4.55838	74.2778	39.4181	-4.04244	0.813059	-4.9719	6.63015e-07	1.74387e-05
BnaA06G0307800ZS	DAP-147	DAP-24	2.48433	18.6534	10.5689	-2.92527	0.588381	-4.97172	6.63606e-07	1.74421e-05
BnaA03G0254400ZS	DAP-147	DAP-24	137.932	533.49	335.711	-1.95253	0.39275	-4.97143	6.64608e-07	1.74563e-05
BnaC09G0037000ZS	DAP-147	DAP-24	0.599675	25.018	12.8088	-5.43589	1.09366	-4.97039	6.68177e-07	1.75378e-05
BnaC05G0010100ZS	DAP-147	DAP-24	19.0509	0.27667	9.66377	5.60929	1.12887	4.96894	6.73204e-07	1.76574e-05
BnaA02G0405800ZS	DAP-147	DAP-24	0.949589	16.1884	8.56901	-4.10053	0.825833	-4.96533	6.85833e-07	1.79762e-05
BnaA02G0010800ZS	DAP-147	DAP-24	0.742209	15.8502	8.29622	-4.39132	0.884808	-4.96302	6.94071e-07	1.81795e-05
BnaA08G0276500ZS	DAP-147	DAP-24	13.2844	0	6.64221	5.81475	1.17173	4.96253	6.95825e-07	1.82127e-05
BnaA08G0047300ZS	DAP-147	DAP-24	21.386	1.63562	11.5108	3.73742	0.753439	4.96048	7.032e-07	1.8393e-05
BnaA07G0234100ZS	DAP-147	DAP-24	0.178343	14.3275	7.25294	-5.97383	1.20448	-4.95967	7.06123e-07	1.84567e-05
BnaC08G0109700ZS	DAP-147	DAP-24	135.29	279.715	207.503	-1.04987	0.211707	-4.95906	7.08352e-07	1.85021e-05
BnaA07G0168000ZS	DAP-147	DAP-24	61.4176	182.527	121.972	-1.57151	0.316922	-4.95866	7.09809e-07	1.85273e-05
BnaA02G0361800ZS	DAP-147	DAP-24	0.61022	32.9257	16.768	-5.82369	1.17472	-4.95753	7.13948e-07	1.86224e-05
BnaA02G0270200ZS	DAP-147	DAP-24	99.2811	35.6541	67.4676	1.4656	0.295645	4.95729	7.14828e-07	1.86325e-05
BnaC08G0318400ZS	DAP-147	DAP-24	0.938844	14.8649	7.90186	-3.98386	0.80389	-4.95573	7.20592e-07	1.87698e-05
BnaA02G0329400ZS	DAP-147	DAP-24	4.56563	23.6662	14.1159	-2.38617	0.481687	-4.95378	7.27873e-07	1.89463e-05
BnaA02G0314300ZS	DAP-147	DAP-24	5.91379	28.8933	17.4036	-2.27524	0.459387	-4.95278	7.31598e-07	1.90301e-05
BnaA05G0494300ZS	DAP-147	DAP-24	0.778018	16.2668	8.52243	-4.41531	0.891612	-4.95206	7.34329e-07	1.9088e-05
BnaA09G0239600ZS	DAP-147	DAP-24	208.559	47.7204	128.139	2.12648	0.42971	4.94863	7.47362e-07	1.94134e-05
BnaC07G0156400ZS	DAP-147	DAP-24	0	9.63583	4.81792	-6.11295	1.23556	-4.9475	7.51713e-07	1.9513e-05
BnaC03G0393200ZS	DAP-147	DAP-24	2.29525	17.1732	9.73423	-2.91966	0.590404	-4.94519	7.6069e-07	1.97188e-05
BnaC05G0012700ZS	DAP-147	DAP-24	61.0461	126.69	93.868	-1.04912	0.212246	-4.94294	7.69535e-07	1.99344e-05
BnaC02G0100700ZS	DAP-147	DAP-24	19.8755	0	9.93773	6.39623	1.29433	4.94174	7.74277e-07	2.00435e-05
BnaA01G0195500ZS	DAP-147	DAP-24	22.655	2.17414	12.4146	3.35172	0.678714	4.93834	7.87893e-07	2.03771e-05
BnaA09G0038300ZS	DAP-147	DAP-24	113.867	374.121	243.994	-1.71617	0.347526	-4.93825	7.88248e-07	2.03771e-05
BnaC09G0339400ZS	DAP-147	DAP-24	20.1607	53.0661	36.6134	-1.40381	0.284284	-4.93806	7.89031e-07	2.03834e-05
BnaA01G0189700ZS	DAP-147	DAP-24	15.379	0	7.68948	6.02685	1.22053	4.9379	7.89699e-07	2.03867e-05
BnaA02G0284400ZS	DAP-147	DAP-24	1.32059	15.6031	8.46183	-3.55413	0.719977	-4.93645	7.95591e-07	2.05247e-05
BnaC08G0361800ZS	DAP-147	DAP-24	173.8	36.6749	105.237	2.23883	0.453612	4.93556	7.99201e-07	2.06037e-05
BnaA10G0237900ZS	DAP-147	DAP-24	29.1729	6.58865	17.8808	2.12867	0.43141	4.93422	8.0471e-07	2.07316e-05
BnaA04G0244300ZS	DAP-147	DAP-24	38.9132	0.582857	19.748	5.93652	1.20324	4.93378	8.06515e-07	2.07639e-05
BnaA03G0058200ZS	DAP-147	DAP-24	85.2052	288.083	186.644	-1.75837	0.35646	-4.93288	8.10272e-07	2.08464e-05
BnaA10G0203600ZS	DAP-147	DAP-24	36.1582	77.3349	56.7465	-1.09969	0.222959	-4.93225	8.12863e-07	2.08988e-05
BnaC04G0604800ZS	DAP-147	DAP-24	23.4313	58.7535	41.0924	-1.32473	0.268607	-4.93186	8.14495e-07	2.09265e-05
BnaA04G0009900ZS	DAP-147	DAP-24	3.55497	20.4071	11.981	-2.51405	0.509874	-4.93074	8.19189e-07	2.10327e-05
BnaC03G0335300ZS	DAP-147	DAP-24	31.4761	92.1283	61.8022	-1.55418	0.315275	-4.9296	8.23969e-07	2.11411e-05
BnaA08G0088600ZS	DAP-147	DAP-24	20.4756	58.8038	39.6397	-1.51809	0.308018	-4.92858	8.28303e-07	2.12317e-05
BnaC07G0134600ZS	DAP-147	DAP-24	390.728	2704.56	1547.64	-2.79136	0.566371	-4.9285	8.28627e-07	2.12317e-05
BnaC04G0024200ZS	DAP-147	DAP-24	3.23709	23.1975	13.2173	-2.8595	0.580944	-4.92216	8.55931e-07	2.19164e-05
BnaA04G0269200ZS	DAP-147	DAP-24	51.4854	343.496	197.49	-2.73893	0.557173	-4.91577	8.84337e-07	2.26283e-05
BnaC07G0041100ZS	DAP-147	DAP-24	31.0369	80.9411	55.989	-1.38971	0.282803	-4.91404	8.92199e-07	2.2814e-05
BnaA05G0327000ZS	DAP-147	DAP-24	55.1173	136.792	95.9547	-1.31181	0.266981	-4.91351	8.94624e-07	2.28605e-05
BnaC03G0264900ZS	DAP-147	DAP-24	40.4098	4.5486	22.4792	3.16661	0.644702	4.91174	9.02723e-07	2.30519e-05
BnaC01G0433900ZS	DAP-147	DAP-24	83.2172	187.095	135.156	-1.17151	0.238526	-4.91147	9.03967e-07	2.3068e-05
BnaC08G0176700ZS	DAP-147	DAP-24	96.4999	227.796	162.148	-1.24042	0.252656	-4.90952	9.12991e-07	2.32825e-05
BnaA09G0007900ZS	DAP-147	DAP-24	16.4305	85.7546	51.0925	-2.38933	0.487057	-4.90565	9.31207e-07	2.3731e-05
BnaA02G0222100ZS	DAP-147	DAP-24	18.5097	0.306186	9.40794	5.57203	1.13643	4.90312	9.43284e-07	2.40225e-05
BnaC05G0100200ZS	DAP-147	DAP-24	21.4018	1.97906	11.6904	3.47197	0.708247	4.9022	9.47669e-07	2.41179e-05
BnaC04G0043000ZS	DAP-147	DAP-24	57.901	1.16571	29.5334	5.55509	1.13327	4.90184	9.49444e-07	2.41468e-05
BnaC02G0032000ZS	DAP-147	DAP-24	0.203407	12.6746	6.43901	-5.78293	1.17984	-4.90144	9.51385e-07	2.41798e-05
BnaA07G0190400ZS	DAP-147	DAP-24	98.0095	217.733	157.871	-1.15018	0.234791	-4.89875	9.64506e-07	2.44968e-05
BnaC06G0024200ZS	DAP-147	DAP-24	115.26	42.2749	78.7674	1.43474	0.29293	4.8979	9.68681e-07	2.45862e-05
BnaA06G0064200ZS	DAP-147	DAP-24	4.10112	26.2943	15.1977	-2.67422	0.54614	-4.89658	9.75204e-07	2.47351e-05
BnaA03G0018900ZS	DAP-147	DAP-24	5.98947	30.8992	18.4443	-2.37745	0.485574	-4.89616	9.77266e-07	2.47708e-05
BnaC02G0482400ZS	DAP-147	DAP-24	47.6056	17.2772	32.4414	1.46351	0.298924	4.89592	9.78458e-07	2.47843e-05
BnaA03G0212400ZS	DAP-147	DAP-24	40.5561	1.77809	21.1671	4.44178	0.90736	4.89528	9.81649e-07	2.48485e-05
BnaA05G0431400ZS	DAP-147	DAP-24	1.34188	15.5132	8.42754	-3.5436	0.724028	-4.89428	9.86642e-07	2.49581e-05
BnaC03G0480200ZS	DAP-147	DAP-24	81.4914	0.889043	41.1902	6.45229	1.31843	4.89393	9.88441e-07	2.49868e-05
BnaC08G0042600ZS	DAP-147	DAP-24	72.1511	30.0713	51.1112	1.26405	0.258313	4.89348	9.90681e-07	2.50267e-05
BnaC02G0125500ZS	DAP-147	DAP-24	5.9825	33.7769	19.8797	-2.51466	0.513915	-4.89315	9.92343e-07	2.50518e-05
BnaA06G0110100ZS	DAP-147	DAP-24	142.976	60.4627	101.719	1.23932	0.253536	4.88816	1.01782e-06	2.56779e-05
BnaC03G0618700ZS	DAP-147	DAP-24	1004.79	4912.26	2958.52	-2.28958	0.468454	-4.88752	1.02117e-06	2.5745e-05
BnaC04G0393300ZS	DAP-147	DAP-24	61.0209	133.508	97.2644	-1.13303	0.231996	-4.88384	1.0404e-06	2.62124e-05
BnaA07G0043200ZS	DAP-147	DAP-24	0	9.57548	4.78774	-6.10673	1.25062	-4.88298	1.04494e-06	2.63092e-05
BnaA06G0134600ZS	DAP-147	DAP-24	51.0926	0.343441	25.718	7.03568	1.44133	4.88137	1.05352e-06	2.65075e-05
BnaA07G0163100ZS	DAP-147	DAP-24	1.34586	16.7527	9.04926	-3.64658	0.747233	-4.88011	1.06026e-06	2.66592e-05
BnaA03G0300600ZS	DAP-147	DAP-24	29.7162	5.23548	17.4759	2.53036	0.51862	4.87903	1.06608e-06	2.67876e-05
BnaA01G0359800ZS	DAP-147	DAP-24	0.585157	19.2509	9.91805	-5.08496	1.04244	-4.87796	1.07188e-06	2.69155e-05
BnaA08G0085600ZS	DAP-147	DAP-24	21.3349	56.3313	38.8331	-1.39226	0.285675	-4.87358	1.09595e-06	2.75017e-05
BnaA04G0257700ZS	DAP-147	DAP-24	23.9042	3.30849	13.6064	2.89215	0.593666	4.87167	1.10656e-06	2.77495e-05
BnaA03G0082800ZS	DAP-147	DAP-24	9.44286	60.9649	35.2039	-2.69924	0.554092	-4.87147	1.10769e-06	2.77593e-05
BnaC07G0512000ZS	DAP-147	DAP-24	45.441	0.582857	23.012	6.1622	1.26513	4.8708	1.11145e-06	2.78349e-05
BnaA02G0029000ZS	DAP-147	DAP-24	0.756728	15.3584	8.05757	-4.35365	0.893973	-4.87	1.11596e-06	2.79294e-05
BnaC08G0402000ZS	DAP-147	DAP-24	17.0517	53.8394	35.4456	-1.66356	0.341708	-4.86835	1.12533e-06	2.81452e-05
BnaC01G0378600ZS	DAP-147	DAP-24	24.5589	0.582857	12.5709	5.26307	1.08146	4.86663	1.1352e-06	2.83732e-05
BnaC07G0361400ZS	DAP-147	DAP-24	1.50291	16.7995	9.15121	-3.47276	0.713747	-4.86553	1.14148e-06	2.85113e-05
BnaC08G0254200ZS	DAP-147	DAP-24	3.02691	19.1215	11.0742	-2.65435	0.545577	-4.86522	1.14328e-06	2.85374e-05
BnaC03G0678600ZS	DAP-147	DAP-24	154.5	55.9711	105.235	1.46434	0.300993	4.86504	1.14431e-06	2.85441e-05
BnaC08G0466300ZS	DAP-147	DAP-24	24.2399	0.859527	12.5497	4.68304	0.962859	4.86369	1.15219e-06	2.87081e-05
BnaC05G0007500ZS	DAP-147	DAP-24	2.48433	17.2695	9.87692	-2.80962	0.577678	-4.86365	1.15241e-06	2.87081e-05
BnaC07G0293300ZS	DAP-147	DAP-24	54.382	147.409	100.895	-1.43915	0.296098	-4.86037	1.17164e-06	2.91539e-05
BnaA05G0334900ZS	DAP-147	DAP-24	33.6022	8.90407	21.2531	1.91166	0.393319	4.86034	1.17185e-06	2.91539e-05
BnaC02G0215200ZS	DAP-147	DAP-24	4.42987	24.8229	14.6264	-2.50884	0.516237	-4.85986	1.17472e-06	2.9206e-05
BnaC07G0367800ZS	DAP-147	DAP-24	24.7237	2.2114	13.4675	3.47504	0.715108	4.85947	1.17703e-06	2.92322e-05
Bnascaffold0026G0072400ZS	DAP-147	DAP-24	29.6753	164.465	97.0699	-2.47137	0.508574	-4.85942	1.17732e-06	2.92322e-05
BnaC04G0317400ZS	DAP-147	DAP-24	50.9731	134.34	92.6567	-1.4014	0.288434	-4.85865	1.18189e-06	2.93264e-05
BnaC05G0102800ZS	DAP-147	DAP-24	18.1326	48.1834	33.158	-1.40416	0.289015	-4.85843	1.18322e-06	2.934e-05
BnaC07G0413700ZS	DAP-147	DAP-24	20.8736	51.8995	36.3865	-1.31341	0.270373	-4.85778	1.18711e-06	2.94172e-05
BnaA01G0427000ZS	DAP-147	DAP-24	4.17991	20.9746	12.5772	-2.33643	0.481126	-4.85618	1.19672e-06	2.96358e-05
BnaA03G0459400ZS	DAP-147	DAP-24	12.7185	0	6.35927	5.75203	1.18482	4.85478	1.20519e-06	2.98258e-05
BnaC03G0715200ZS	DAP-147	DAP-24	13.6672	62.3111	37.9891	-2.19208	0.45159	-4.85414	1.20911e-06	2.99032e-05
BnaA07G0208100ZS	DAP-147	DAP-24	46.5429	210.951	128.747	-2.18165	0.449478	-4.85373	1.21158e-06	2.99447e-05
BnaC09G0350100ZS	DAP-147	DAP-24	2.10238	16.6809	9.39163	-3.00846	0.619871	-4.85337	1.21383e-06	2.99807e-05
BnaA03G0381100ZS	DAP-147	DAP-24	45.2511	5.65724	25.4542	2.95075	0.608004	4.85318	1.21495e-06	2.99886e-05
BnaA06G0163000ZS	DAP-147	DAP-24	98.9437	44.3096	71.6267	1.16427	0.240012	4.85089	1.22908e-06	3.03175e-05
BnaA04G0272500ZS	DAP-147	DAP-24	0.61022	18.6567	9.63344	-5.01474	1.03416	-4.8491	1.24022e-06	3.05725e-05
BnaC02G0073900ZS	DAP-147	DAP-24	15.9091	54.4107	35.1599	-1.77611	0.366288	-4.84894	1.24123e-06	3.05774e-05
BnaA07G0258500ZS	DAP-147	DAP-24	35.8532	442.554	239.203	-3.6283	0.748292	-4.84878	1.24222e-06	3.05817e-05
BnaC07G0364600ZS	DAP-147	DAP-24	40.8966	1.44238	21.1695	4.73055	0.976753	4.84314	1.27803e-06	3.14428e-05
BnaC06G0271500ZS	DAP-147	DAP-24	11.2726	48.6452	29.9589	-2.12129	0.438194	-4.84099	1.29192e-06	3.17638e-05
BnaC03G0664000ZS	DAP-147	DAP-24	12.733	0	6.36649	5.75004	1.18785	4.84073	1.29366e-06	3.17802e-05
BnaC06G0315600ZS	DAP-147	DAP-24	0	15.092	7.546	-6.753	1.39507	-4.84063	1.29428e-06	3.17802e-05
BnaC08G0282300ZS	DAP-147	DAP-24	2.66268	18.6162	10.6394	-2.8183	0.582686	-4.83673	1.31989e-06	3.23881e-05
BnaC05G0439500ZS	DAP-147	DAP-24	7.89195	77.1474	42.5197	-3.30083	0.682627	-4.83548	1.32826e-06	3.25614e-05
BnaA09G0625700ZS	DAP-147	DAP-24	13.5607	43.8428	28.7018	-1.69381	0.350293	-4.83541	1.32868e-06	3.25614e-05
BnaC03G0350200ZS	DAP-147	DAP-24	84.8951	29.2815	57.0883	1.53575	0.317687	4.83415	1.33713e-06	3.2744e-05
BnaC07G0211500ZS	DAP-147	DAP-24	41.5739	12.8313	27.2026	1.72356	0.356546	4.83404	1.33787e-06	3.2744e-05
BnaA09G0020000ZS	DAP-147	DAP-24	30.5989	2.05542	16.3271	3.8178	0.789999	4.83267	1.34716e-06	3.29499e-05
BnaC04G0590200ZS	DAP-147	DAP-24	0.203407	16.1891	8.19623	-6.15117	1.27305	-4.83184	1.3528e-06	3.30664e-05
BnaA07G0274700ZS	DAP-147	DAP-24	0.406813	17.7478	9.0773	-5.55287	1.14955	-4.83049	1.36195e-06	3.32574e-05
BnaC08G0273300ZS	DAP-147	DAP-24	36.8004	4.06214	20.4313	3.22582	0.667826	4.83034	1.36303e-06	3.32574e-05
BnaA03G0054700ZS	DAP-147	DAP-24	2.24889	16.8131	9.531	-2.88905	0.59811	-4.8303	1.36326e-06	3.32574e-05
BnaA03G0484100ZS	DAP-147	DAP-24	4.35468	29.5615	16.9581	-2.77453	0.574506	-4.82941	1.36935e-06	3.33747e-05
BnaA05G0497800ZS	DAP-147	DAP-24	9.85895	33.4702	21.6646	-1.76833	0.366163	-4.82934	1.36984e-06	3.33747e-05
BnaC09G0486400ZS	DAP-147	DAP-24	26.9577	1.29218	14.125	4.39854	0.910826	4.82917	1.37101e-06	3.33817e-05
BnaA09G0624200ZS	DAP-147	DAP-24	8.52064	29.5794	19.05	-1.79441	0.371634	-4.82845	1.37601e-06	3.34818e-05
BnaC08G0404900ZS	DAP-147	DAP-24	1.11719	14.4547	7.78593	-3.68622	0.763572	-4.8276	1.3819e-06	3.36034e-05
BnaA01G0134700ZS	DAP-147	DAP-24	20.8308	1.25492	11.0429	4.03209	0.835401	4.82653	1.38934e-06	3.37624e-05
BnaC04G0568800ZS	DAP-147	DAP-24	0.599675	16.7002	8.64992	-4.8606	1.0073	-4.82536	1.39747e-06	3.39382e-05
BnaA07G0224900ZS	DAP-147	DAP-24	0	11.9306	5.96532	-6.43243	1.33357	-4.82346	1.41091e-06	3.42424e-05
BnaA01G0175700ZS	DAP-147	DAP-24	0.192861	11.9506	6.07173	-5.70019	1.18185	-4.82312	1.41327e-06	3.42778e-05
BnaA02G0393100ZS	DAP-147	DAP-24	22.6848	1.26266	11.9737	4.15185	0.861401	4.81989	1.4364e-06	3.48162e-05
BnaC07G0208000ZS	DAP-147	DAP-24	0.203407	18.9598	9.58161	-6.36263	1.3208	-4.81724	1.45559e-06	3.52406e-05
BnaC05G0146100ZS	DAP-147	DAP-24	53.3494	20.63	36.9897	1.37902	0.286269	4.81721	1.45577e-06	3.52406e-05
BnaA03G0415700ZS	DAP-147	DAP-24	1.11341	14.4682	7.7908	-3.67782	0.763515	-4.81696	1.45765e-06	3.52634e-05
BnaC08G0238000ZS	DAP-147	DAP-24	1.53852	15.1935	8.36601	-3.32891	0.691106	-4.81679	1.45885e-06	3.52699e-05
BnaC05G0021000ZS	DAP-147	DAP-24	32.5688	89.1032	60.836	-1.45009	0.301069	-4.81648	1.46116e-06	3.53029e-05
BnaC03G0099400ZS	DAP-147	DAP-24	76.2268	8.01361	42.1202	3.271	0.679326	4.81507	1.4715e-06	3.55301e-05
BnaC09G0570800ZS	DAP-147	DAP-24	0	10.0004	5.00019	-6.16642	1.28082	-4.81442	1.47625e-06	3.56219e-05
BnaC07G0453500ZS	DAP-147	DAP-24	1.92047	17.2753	9.59787	-3.17837	0.66062	-4.81119	1.50032e-06	3.61795e-05
BnaA08G0255900ZS	DAP-147	DAP-24	0.781791	15.5607	8.17124	-4.3648	0.907271	-4.81092	1.50238e-06	3.62061e-05
BnaC04G0448900ZS	DAP-147	DAP-24	0.406813	22.4131	11.4099	-5.87634	1.22151	-4.81071	1.50396e-06	3.6221e-05
BnaA07G0022500ZS	DAP-147	DAP-24	2.47359	16.6423	9.55795	-2.75763	0.573284	-4.81024	1.50747e-06	3.62823e-05
BnaC06G0413700ZS	DAP-147	DAP-24	60.8463	5.74579	33.2961	3.37595	0.701938	4.80947	1.51329e-06	3.6399e-05
BnaC05G0173400ZS	DAP-147	DAP-24	451.119	1408.45	929.782	-1.64273	0.341573	-4.80931	1.51451e-06	3.64053e-05
BnaC08G0084100ZS	DAP-147	DAP-24	0.203407	11.9371	6.07024	-5.70921	1.18733	-4.80845	1.52108e-06	3.65397e-05
BnaA05G0445900ZS	DAP-147	DAP-24	1.3564	15.9838	8.67008	-3.57838	0.744292	-4.80776	1.52634e-06	3.66428e-05
BnaC02G0523300ZS	DAP-147	DAP-24	0	11.2451	5.62255	-6.34886	1.3214	-4.80466	1.55017e-06	3.71911e-05
BnaC04G0310200ZS	DAP-147	DAP-24	0	9.44771	4.72385	-6.08071	1.26591	-4.80344	1.55964e-06	3.73947e-05
BnaA09G0068700ZS	DAP-147	DAP-24	180.048	11.0152	95.5314	4.04772	0.842714	4.80319	1.56157e-06	3.74171e-05
BnaC03G0268800ZS	DAP-147	DAP-24	28.3212	3.66086	15.991	2.90435	0.604714	4.80286	1.56418e-06	3.74559e-05
BnaC01G0169700ZS	DAP-147	DAP-24	0.781791	15.3406	8.06117	-4.3276	0.901112	-4.80251	1.56692e-06	3.74976e-05
BnaA09G0623700ZS	DAP-147	DAP-24	40.543	87.3667	63.9549	-1.10409	0.229944	-4.80154	1.57449e-06	3.76549e-05
BnaA05G0063500ZS	DAP-147	DAP-24	62.4144	5.82477	34.1196	3.45778	0.720305	4.80044	1.58319e-06	3.7839e-05
BnaA03G0449200ZS	DAP-147	DAP-24	1.153	15.7739	8.46343	-3.78296	0.788112	-4.80003	1.58643e-06	3.78925e-05
BnaC04G0026000ZS	DAP-147	DAP-24	1.53852	15.655	8.59677	-3.35773	0.69964	-4.79923	1.59279e-06	3.80201e-05
BnaA04G0230400ZS	DAP-147	DAP-24	50.0092	11.6167	30.813	2.0972	0.437043	4.79861	1.59772e-06	3.81138e-05
BnaC05G0441200ZS	DAP-147	DAP-24	15.2241	42.4949	28.8595	-1.48671	0.309865	-4.79793	1.60313e-06	3.82185e-05
BnaA09G0658700ZS	DAP-147	DAP-24	2.32031	17.9801	10.1502	-2.98278	0.621733	-4.79752	1.60642e-06	3.82729e-05
BnaA02G0257600ZS	DAP-147	DAP-24	0.203407	11.7644	5.98392	-5.68379	1.18612	-4.79194	1.65178e-06	3.93287e-05
BnaA03G0225600ZS	DAP-147	DAP-24	56.9217	6.14893	31.5353	3.19092	0.66624	4.78945	1.67243e-06	3.97951e-05
BnaA04G0030300ZS	DAP-147	DAP-24	122.967	2.69731	62.8323	5.48107	1.14472	4.78812	1.68349e-06	4.0033e-05
BnaC05G0484600ZS	DAP-147	DAP-24	1.13848	14.0502	7.59435	-3.6321	0.758609	-4.78784	1.68583e-06	4.00634e-05
BnaA05G0464800ZS	DAP-147	DAP-24	1.74213	17.6418	9.69197	-3.35643	0.701367	-4.78555	1.70517e-06	4.04974e-05
BnaA03G0435900ZS	DAP-147	DAP-24	0	10.1582	5.07912	-6.18389	1.29241	-4.78476	1.71192e-06	4.06323e-05
BnaA09G0511900ZS	DAP-147	DAP-24	1.52023	17.812	9.66609	-3.54736	0.741556	-4.78367	1.72121e-06	4.08269e-05
BnaA03G0062400ZS	DAP-147	DAP-24	0.406813	18.7024	9.55461	-5.62268	1.17595	-4.7814	1.74081e-06	4.1266e-05
BnaA07G0246800ZS	DAP-147	DAP-24	12.6959	0	6.34795	5.7496	1.20283	4.78008	1.7523e-06	4.15121e-05
BnaC08G0355700ZS	DAP-147	DAP-24	38.6703	5.31891	21.9946	2.84886	0.596007	4.7799	1.7538e-06	4.15217e-05
BnaA10G0003900ZS	DAP-147	DAP-24	0.38175	26.5078	13.4448	-6.14128	1.28508	-4.7789	1.76253e-06	4.17021e-05
BnaA06G0334400ZS	DAP-147	DAP-24	67.5156	14.1503	40.833	2.23655	0.468063	4.77832	1.76769e-06	4.17966e-05
BnaC07G0032700ZS	DAP-147	DAP-24	42.4182	8.28211	25.3502	2.38413	0.499065	4.7772	1.77757e-06	4.19789e-05
BnaA10G0008100ZS	DAP-147	DAP-24	12.4681	36.1072	24.2876	-1.53493	0.321338	-4.77667	1.7822e-06	4.20619e-05
BnaC09G0405800ZS	DAP-147	DAP-24	12.7688	0	6.38439	5.75368	1.20477	4.77574	1.79051e-06	4.22317e-05
BnaA08G0207100ZS	DAP-147	DAP-24	1359.62	3634.08	2496.85	-1.41841	0.297027	-4.77534	1.79404e-06	4.22884e-05
BnaA03G0206300ZS	DAP-147	DAP-24	0	9.36809	4.68405	-6.08139	1.27367	-4.77471	1.79965e-06	4.23942e-05
BnaA02G0368900ZS	DAP-147	DAP-24	1.12793	15.734	8.43096	-3.81067	0.798191	-4.77413	1.80481e-06	4.24892e-05
BnaA02G0065100ZS	DAP-147	DAP-24	0	9.19478	4.59739	-6.05035	1.26764	-4.77294	1.81553e-06	4.27148e-05
BnaC05G0136100ZS	DAP-147	DAP-24	139.959	50.366	95.1626	1.46821	0.307649	4.77235	1.82092e-06	4.2815e-05
BnaA09G0458700ZS	DAP-147	DAP-24	78.1218	21.0236	49.5727	1.90809	0.399878	4.77169	1.82688e-06	4.29282e-05
BnaA09G0482200ZS	DAP-147	DAP-24	0.938844	13.7364	7.33763	-3.86526	0.810762	-4.76744	1.86579e-06	4.37934e-05
BnaC03G0344500ZS	DAP-147	DAP-24	4.39386	26.4104	15.4021	-2.60862	0.547181	-4.76738	1.86639e-06	4.37934e-05
BnaC09G0579300ZS	DAP-147	DAP-24	30.4843	0.306186	15.3952	6.29151	1.31972	4.76729	1.86718e-06	4.37934e-05
BnaA09G0003500ZS	DAP-147	DAP-24	10.2041	35.5909	22.8975	-1.79764	0.377192	-4.76585	1.88063e-06	4.40813e-05
BnaA08G0140100ZS	DAP-147	DAP-24	28.7881	67.2382	48.0132	-1.22746	0.257579	-4.76536	1.88515e-06	4.41598e-05
BnaA05G0430900ZS	DAP-147	DAP-24	0.192861	12.1514	6.17216	-5.71886	1.20028	-4.7646	1.89229e-06	4.4275e-05
BnaC04G0521800ZS	DAP-147	DAP-24	13.5486	68.0671	40.8079	-2.3291	0.488836	-4.76459	1.89242e-06	4.4275e-05
BnaA02G0412400ZS	DAP-147	DAP-24	26.8798	74.5555	50.7177	-1.47333	0.30927	-4.7639	1.89886e-06	4.43981e-05
Bnascaffold0025G0009100ZS	DAP-147	DAP-24	37.6105	5.96146	21.786	2.64663	0.55558	4.76373	1.90051e-06	4.44093e-05
BnaA02G0199900ZS	DAP-147	DAP-24	0.538803	15.1486	7.84371	-4.75753	0.998882	-4.76285	1.90873e-06	4.45737e-05
BnaA02G0384800ZS	DAP-147	DAP-24	2.63364	18.8101	10.7219	-2.84167	0.596738	-4.762	1.91685e-06	4.47105e-05
BnaA01G0043400ZS	DAP-147	DAP-24	0	9.15688	4.57844	-6.03372	1.26706	-4.76199	1.91696e-06	4.47105e-05
BnaC09G0273000ZS	DAP-147	DAP-24	25.5024	3.13769	14.3201	3.00828	0.632124	4.75901	1.94546e-06	4.53471e-05
BnaC03G0039100ZS	DAP-147	DAP-24	4.3115	30.5746	17.443	-2.81345	0.591536	-4.75618	1.97292e-06	4.59347e-05
BnaA03G0282500ZS	DAP-147	DAP-24	0.778018	14.542	7.66002	-4.25572	0.89478	-4.75616	1.9731e-06	4.59347e-05
BnaC06G0105800ZS	DAP-147	DAP-24	39.9508	10.003	24.9769	1.98281	0.417044	4.75443	1.99006e-06	4.63008e-05
BnaA01G0372200ZS	DAP-147	DAP-24	1.13848	14.0727	7.60557	-3.63347	0.764389	-4.75343	1.99991e-06	4.65013e-05
BnaC03G0498700ZS	DAP-147	DAP-24	53.119	10.6911	31.905	2.28641	0.4811	4.75247	2.00945e-06	4.66944e-05
BnaA06G0276300ZS	DAP-147	DAP-24	1.153	15.6588	8.40592	-3.7896	0.797442	-4.75219	2.01227e-06	4.67311e-05
BnaA06G0051100ZS	DAP-147	DAP-24	12.5075	36.5713	24.5394	-1.55382	0.327033	-4.75127	2.02144e-06	4.68921e-05
BnaA06G0143200ZS	DAP-147	DAP-24	24.1394	59.7103	41.9248	-1.29934	0.273475	-4.75124	2.02169e-06	4.68921e-05
BnaC06G0182600ZS	DAP-147	DAP-24	1.84565	47.3367	24.5912	-4.67309	0.983597	-4.75102	2.02398e-06	4.68984e-05
BnaC03G0195800ZS	DAP-147	DAP-24	59.2047	168.173	113.689	-1.50726	0.317253	-4.75097	2.02445e-06	4.68984e-05
BnaA08G0227200ZS	DAP-147	DAP-24	29.3409	7.40962	18.3753	1.99575	0.420095	4.7507	2.02715e-06	4.6932e-05
BnaC07G0499600ZS	DAP-147	DAP-24	6.89668	27.7802	17.3385	-2.0217	0.425617	-4.75004	2.03379e-06	4.70568e-05
BnaC06G0242000ZS	DAP-147	DAP-24	0	13.8121	6.90605	-6.64083	1.39821	-4.74952	2.03903e-06	4.71492e-05
BnaA03G0321400ZS	DAP-147	DAP-24	19.9395	1.63562	10.7876	3.63769	0.765949	4.74926	2.04167e-06	4.71813e-05
BnaA05G0332300ZS	DAP-147	DAP-24	51.7056	10.7488	31.2272	2.26129	0.476209	4.74852	2.04913e-06	4.73247e-05
BnaA08G0161200ZS	DAP-147	DAP-24	0	9.78472	4.89236	-6.14117	1.29351	-4.74767	2.05772e-06	4.74938e-05
BnaC08G0132300ZS	DAP-147	DAP-24	0	14.7633	7.38167	-6.73837	1.41956	-4.74679	2.06673e-06	4.76725e-05
BnaA04G0283000ZS	DAP-147	DAP-24	0.578384	14.9824	7.7804	-4.71422	0.994577	-4.73992	2.13799e-06	4.92863e-05
BnaA09G0503600ZS	DAP-147	DAP-24	2.41979	60.7231	31.5714	-4.67603	0.986602	-4.73953	2.14216e-06	4.93523e-05
BnaC08G0217400ZS	DAP-147	DAP-24	2.92696	21.198	12.0625	-2.88257	0.608335	-4.73845	2.15361e-06	4.95856e-05
BnaA03G0511700ZS	DAP-147	DAP-24	19.1709	59.4008	39.2859	-1.62835	0.343702	-4.73768	2.16177e-06	4.97431e-05
BnaC05G0559800ZS	DAP-147	DAP-24	1.89521	15.6506	8.77288	-3.0601	0.645976	-4.73718	2.16716e-06	4.98367e-05
BnaC01G0240700ZS	DAP-147	DAP-24	778.134	190.629	484.382	2.02902	0.428345	4.73687	2.17039e-06	4.98806e-05
BnaA03G0219500ZS	DAP-147	DAP-24	51.1716	1096.55	573.86	-4.42302	0.934011	-4.73551	2.1851e-06	5.01881e-05
BnaC07G0227600ZS	DAP-147	DAP-24	0	9.12094	4.56047	-6.04084	1.27575	-4.73514	2.18906e-06	5.02483e-05
BnaA10G0024400ZS	DAP-147	DAP-24	2.12388	31.4385	16.7812	-3.8946	0.822783	-4.73345	2.20738e-06	5.06381e-05
BnaC03G0189500ZS	DAP-147	DAP-24	405.178	946.983	676.081	-1.22428	0.258807	-4.73046	2.24014e-06	5.13271e-05
BnaA02G0077500ZS	DAP-147	DAP-24	209.885	97.7476	153.816	1.10003	0.232704	4.72714	2.27706e-06	5.21414e-05
BnaC06G0351000ZS	DAP-147	DAP-24	66.0332	8.01622	37.0247	3.02613	0.640191	4.72692	2.27948e-06	5.2165e-05
BnaA06G0014800ZS	DAP-147	DAP-24	22.5229	3.81684	13.1699	2.55488	0.540552	4.72642	2.28513e-06	5.22627e-05
BnaA07G0209400ZS	DAP-147	DAP-24	31.3297	105.462	68.3959	-1.75324	0.37098	-4.72596	2.29029e-06	5.2349e-05
BnaA07G0288300ZS	DAP-147	DAP-24	118.623	37.5523	78.0879	1.65259	0.349774	4.72473	2.30426e-06	5.26363e-05
BnaC04G0494000ZS	DAP-147	DAP-24	19.1503	1.63562	10.393	3.58057	0.757869	4.72452	2.30658e-06	5.26573e-05
BnaC07G0166900ZS	DAP-147	DAP-24	0	9.45796	4.72898	-6.09147	1.28975	-4.72299	2.32403e-06	5.30235e-05
BnaA03G0423900ZS	DAP-147	DAP-24	28.8418	75.8758	52.3588	-1.39062	0.294447	-4.72281	2.3261e-06	5.30386e-05
BnaC08G0216300ZS	DAP-147	DAP-24	10.7299	33.0812	21.9056	-1.61952	0.342987	-4.72181	2.33751e-06	5.32667e-05
BnaC07G0084200ZS	DAP-147	DAP-24	67.4777	0.64255	34.0601	6.72908	1.42544	4.7207	2.3503e-06	5.35257e-05
BnaC02G0530100ZS	DAP-147	DAP-24	11.5828	0	5.79139	5.61349	1.18928	4.72005	2.35782e-06	5.36645e-05
BnaA03G0497900ZS	DAP-147	DAP-24	60.0243	216.96	138.492	-1.85436	0.393036	-4.71804	2.3813e-06	5.41664e-05
BnaC06G0177100ZS	DAP-147	DAP-24	37.2157	4.02674	20.6212	3.18708	0.675588	4.7175	2.38764e-06	5.42778e-05
BnaC09G0277000ZS	DAP-147	DAP-24	195.857	77.5516	136.704	1.33138	0.282277	4.71658	2.39838e-06	5.44891e-05
BnaA05G0351900ZS	DAP-147	DAP-24	0.778018	15.4151	8.09654	-4.33431	0.919376	-4.71441	2.42418e-06	5.50126e-05
BnaC02G0091200ZS	DAP-147	DAP-24	0.396268	15.5292	7.96274	-5.36128	1.13722	-4.71439	2.42434e-06	5.50126e-05
BnaC04G0258800ZS	DAP-147	DAP-24	0.396268	15.9413	8.16878	-5.39566	1.14459	-4.71404	2.42848e-06	5.50732e-05
BnaC04G0040000ZS	DAP-147	DAP-24	0.563866	14.1112	7.33755	-4.64836	0.986136	-4.71371	2.43247e-06	5.51306e-05
BnaA08G0221300ZS	DAP-147	DAP-24	25.8798	63.7745	44.8271	-1.29875	0.275538	-4.71349	2.43513e-06	5.51577e-05
BnaA04G0063700ZS	DAP-147	DAP-24	0.203407	11.8157	6.00958	-5.67845	1.20489	-4.71283	2.44301e-06	5.5303e-05
BnaC08G0410200ZS	DAP-147	DAP-24	125.428	432.148	278.788	-1.78572	0.379037	-4.71121	2.46249e-06	5.57104e-05
BnaA03G0287700ZS	DAP-147	DAP-24	237.223	113.582	175.402	1.06608	0.2263	4.71092	2.46605e-06	5.57575e-05
BnaA04G0042300ZS	DAP-147	DAP-24	46.932	106.505	76.7187	-1.18859	0.252348	-4.71014	2.47549e-06	5.59375e-05
BnaC07G0401300ZS	DAP-147	DAP-24	40.201	6.77666	23.4889	2.54466	0.540357	4.70922	2.48669e-06	5.61568e-05
BnaC09G0149400ZS	DAP-147	DAP-24	0.599675	14.9534	7.77656	-4.70325	0.999268	-4.7067	2.51764e-06	5.68218e-05
BnaA06G0155700ZS	DAP-147	DAP-24	0.563866	13.6324	7.09813	-4.59426	0.976175	-4.70639	2.52145e-06	5.68738e-05
BnaA06G0350800ZS	DAP-147	DAP-24	29.9616	7.01422	18.4879	2.09587	0.445425	4.70533	2.53452e-06	5.71343e-05
BnaC07G0517300ZS	DAP-147	DAP-24	22.8067	0.343441	11.575	5.87356	1.24841	4.70485	2.54058e-06	5.72368e-05
BnaC03G0373400ZS	DAP-147	DAP-24	55.049	21.9164	38.4827	1.32563	0.28191	4.7023	2.57245e-06	5.79201e-05
BnaC09G0496300ZS	DAP-147	DAP-24	16.6844	49.6483	33.1664	-1.58431	0.336975	-4.70157	2.58172e-06	5.80857e-05
BnaA07G0110400ZS	DAP-147	DAP-24	0	8.84493	4.42246	-5.99481	1.27509	-4.70147	2.58289e-06	5.80857e-05
BnaC04G0005800ZS	DAP-147	DAP-24	0.192861	11.4197	5.80628	-5.63111	1.19779	-4.70125	2.5857e-06	5.81142e-05
BnaC07G0124100ZS	DAP-147	DAP-24	19.0187	1.29218	10.1555	3.89474	0.828918	4.69858	2.61974e-06	5.88443e-05
BnaC09G0465500ZS	DAP-147	DAP-24	68.6761	26.744	47.7101	1.35126	0.287608	4.69828	2.62365e-06	5.88968e-05
BnaA03G0477900ZS	DAP-147	DAP-24	11.0614	0	5.53069	5.55025	1.18203	4.69554	2.65901e-06	5.96552e-05
BnaC07G0481600ZS	DAP-147	DAP-24	38.0204	118.056	78.0383	-1.63754	0.348754	-4.69542	2.66062e-06	5.96559e-05
BnaC07G0311300ZS	DAP-147	DAP-24	0.38175	15.2891	7.83545	-5.3326	1.13577	-4.69513	2.66432e-06	5.97032e-05
BnaA03G0133300ZS	DAP-147	DAP-24	1.50271	16.8997	9.20121	-3.50006	0.745651	-4.69397	2.67959e-06	6.00098e-05
BnaC07G0495600ZS	DAP-147	DAP-24	7.65744	84.3898	46.0236	-3.45539	0.736158	-4.69382	2.68152e-06	6.00174e-05
BnaA09G0490900ZS	DAP-147	DAP-24	43.4925	11.2347	27.3636	1.95966	0.417574	4.69297	2.69263e-06	6.01593e-05
BnaC01G0098200ZS	DAP-147	DAP-24	0	9.79823	4.89911	-6.13391	1.30704	-4.69297	2.69265e-06	6.01593e-05
BnaC03G0171100ZS	DAP-147	DAP-24	0	9.79823	4.89911	-6.13391	1.30704	-4.69297	2.69265e-06	6.01593e-05
BnaA09G0450200ZS	DAP-147	DAP-24	25.095	186.349	105.722	-2.89663	0.617423	-4.69149	2.7122e-06	6.05602e-05
BnaC03G0285900ZS	DAP-147	DAP-24	4.11903	20.4232	12.2711	-2.31143	0.492705	-4.6913	2.71472e-06	6.05804e-05
BnaA09G0420000ZS	DAP-147	DAP-24	30.2774	5.16871	17.723	2.56392	0.546644	4.69029	2.72824e-06	6.08462e-05
BnaA05G0399200ZS	DAP-147	DAP-24	22.9905	4.18272	13.5866	2.46698	0.526227	4.68806	2.75813e-06	6.1445e-05
BnaA08G0291100ZS	DAP-147	DAP-24	0	8.51564	4.25782	-5.9414	1.26736	-4.68802	2.7586e-06	6.1445e-05
BnaC02G0065600ZS	DAP-147	DAP-24	7.12873	33.9691	20.5489	-2.26153	0.482417	-4.68792	2.75998e-06	6.1445e-05
BnaC09G0338800ZS	DAP-147	DAP-24	0	8.77564	4.38782	-5.97484	1.27476	-4.68701	2.77221e-06	6.16774e-05
BnaC09G0090300ZS	DAP-147	DAP-24	51.0023	13.581	32.2916	1.90427	0.406296	4.6869	2.77369e-06	6.16774e-05
BnaC09G0097300ZS	DAP-147	DAP-24	0.182116	12.9731	6.5776	-5.81166	1.24051	-4.6849	2.80098e-06	6.22474e-05
BnaA08G0191900ZS	DAP-147	DAP-24	1.34188	14.386	7.86396	-3.43955	0.734227	-4.68459	2.80527e-06	6.23062e-05
BnaC03G0385100ZS	DAP-147	DAP-24	21.2952	0.859527	11.0773	4.49547	0.959795	4.68378	2.81639e-06	6.25162e-05
BnaA07G0198600ZS	DAP-147	DAP-24	22.8453	3.51065	13.178	2.69839	0.576182	4.68322	2.82397e-06	6.26477e-05
BnaA02G0186800ZS	DAP-147	DAP-24	2.88438	18.2125	10.5484	-2.68392	0.573171	-4.68258	2.83288e-06	6.28082e-05
BnaC03G0315800ZS	DAP-147	DAP-24	71.2387	24.5443	47.8915	1.54626	0.330349	4.68067	2.85935e-06	6.3358e-05
BnaC06G0177400ZS	DAP-147	DAP-24	26.0066	70.2373	48.122	-1.43749	0.307556	-4.67391	2.95525e-06	6.54445e-05
BnaC05G0104300ZS	DAP-147	DAP-24	0.203407	14.43	7.31673	-5.97066	1.27781	-4.67258	2.97445e-06	6.58308e-05
BnaC08G0404600ZS	DAP-147	DAP-24	2.09184	15.3348	8.71331	-2.88211	0.617008	-4.67111	2.99573e-06	6.62629e-05
BnaA01G0058200ZS	DAP-147	DAP-24	0	9.44128	4.72064	-6.09039	1.30393	-4.6708	3.00031e-06	6.63254e-05
BnaC05G0249900ZS	DAP-147	DAP-24	24.4547	4.65262	14.5537	2.43391	0.521155	4.67023	3.00865e-06	6.64708e-05
BnaC03G0142700ZS	DAP-147	DAP-24	20.5241	2.73456	11.6293	2.85133	0.61072	4.66881	3.02956e-06	6.68935e-05
BnaC01G0312000ZS	DAP-147	DAP-24	1.79902	26.522	14.1605	-3.91956	0.839885	-4.66678	3.05956e-06	6.75164e-05
BnaA05G0388200ZS	DAP-147	DAP-24	1.71686	18.7523	10.2346	-3.4455	0.738427	-4.666	3.0712e-06	6.77335e-05
BnaC03G0353800ZS	DAP-147	DAP-24	0.756728	14.3275	7.54213	-4.25569	0.912301	-4.66478	3.08943e-06	6.80958e-05
BnaC09G0465900ZS	DAP-147	DAP-24	27.2329	70.9741	49.1035	-1.37976	0.295799	-4.66452	3.09342e-06	6.81438e-05
BnaA02G0380400ZS	DAP-147	DAP-24	0	22.0849	11.0425	-7.31603	1.56852	-4.66429	3.09686e-06	6.81797e-05
BnaA06G0450600ZS	DAP-147	DAP-24	32.8024	5.6238	19.2131	2.57085	0.551197	4.66412	3.09936e-06	6.81949e-05
BnaA06G0381900ZS	DAP-147	DAP-24	25.6975	4.64685	15.1722	2.43823	0.522935	4.66259	3.12248e-06	6.86636e-05
BnaC09G0547500ZS	DAP-147	DAP-24	62.1343	25.83	43.9822	1.26687	0.271752	4.66186	3.13364e-06	6.88688e-05
BnaC03G0435300ZS	DAP-147	DAP-24	55.017	22.9845	39.0007	1.2582	0.269921	4.66138	3.14097e-06	6.89897e-05
BnaA02G0320900ZS	DAP-147	DAP-24	15.717	81.8663	48.7916	-2.37774	0.510134	-4.66101	3.14663e-06	6.90736e-05
BnaA03G0098200ZS	DAP-147	DAP-24	0	8.61193	4.30596	-5.95395	1.27748	-4.6607	3.1513e-06	6.91361e-05
BnaA06G0101500ZS	DAP-147	DAP-24	23.1993	1.47964	12.3395	3.88887	0.834678	4.65912	3.17557e-06	6.96278e-05
BnaC05G0050500ZS	DAP-147	DAP-24	32.5029	3.51839	18.0107	3.21184	0.689503	4.6582	3.18981e-06	6.98995e-05
BnaC07G0174500ZS	DAP-147	DAP-24	1.15977	20.4176	10.7887	-4.15104	0.8913	-4.65729	3.20405e-06	7.01708e-05
BnaA09G0499700ZS	DAP-147	DAP-24	1.38147	16.2225	8.80199	-3.59332	0.771622	-4.65683	3.21111e-06	7.02846e-05
BnaA08G0029700ZS	DAP-147	DAP-24	2.10258	17.0923	9.59743	-3.0464	0.654421	-4.65511	3.23808e-06	7.08337e-05
BnaC05G0466000ZS	DAP-147	DAP-24	11.802	55.3089	33.5554	-2.23864	0.480967	-4.65445	3.2484e-06	7.10182e-05
BnaC03G0138300ZS	DAP-147	DAP-24	0.406813	16.7219	8.56438	-5.45625	1.17238	-4.65397	3.25602e-06	7.11435e-05
BnaC04G0099500ZS	DAP-147	DAP-24	13.7536	54.1389	33.9462	-1.97714	0.424948	-4.65267	3.27666e-06	7.15188e-05
BnaA03G0130000ZS	DAP-147	DAP-24	38.056	4.36887	21.2125	3.16243	0.679704	4.65265	3.27699e-06	7.15188e-05
BnaC02G0430000ZS	DAP-147	DAP-24	9.91195	33.0536	21.4828	-1.7336	0.372649	-4.65209	3.28584e-06	7.16704e-05
BnaA03G0187400ZS	DAP-147	DAP-24	0	8.7031	4.35155	-5.97708	1.28494	-4.65165	3.29293e-06	7.17836e-05
BnaA05G0011000ZS	DAP-147	DAP-24	33.0248	2.81669	17.9207	3.538	0.760693	4.65102	3.30292e-06	7.19597e-05
BnaA03G0063700ZS	DAP-147	DAP-24	11.7874	0	5.89368	5.63875	1.21249	4.65054	3.31066e-06	7.20635e-05
BnaC03G0155700ZS	DAP-147	DAP-24	5.29709	22.3624	13.8297	-2.07201	0.445547	-4.65049	3.31151e-06	7.20635e-05
BnaA09G0557600ZS	DAP-147	DAP-24	1.3564	14.2069	7.78163	-3.4123	0.734195	-4.64768	3.35691e-06	7.30094e-05
BnaA09G0387500ZS	DAP-147	DAP-24	33.6377	9.42778	21.5327	1.82161	0.391968	4.64735	3.36233e-06	7.30449e-05
BnaC07G0260600ZS	DAP-147	DAP-24	166.206	21.3751	93.7905	2.9501	0.634793	4.64734	3.36242e-06	7.30449e-05
BnaC03G0646900ZS	DAP-147	DAP-24	5.52459	25.5296	15.5271	-2.21095	0.475894	-4.6459	3.38605e-06	7.35158e-05
BnaC07G0449500ZS	DAP-147	DAP-24	1.32059	13.4154	7.368	-3.34449	0.720435	-4.64232	3.44513e-06	7.47555e-05
BnaA07G0274200ZS	DAP-147	DAP-24	20.7611	65.0343	42.8977	-1.65066	0.355598	-4.64193	3.45164e-06	7.48538e-05
BnaC07G0518500ZS	DAP-147	DAP-24	41.526	9.48748	25.5067	2.12575	0.457966	4.64173	3.45502e-06	7.48839e-05
BnaA05G0413900ZS	DAP-147	DAP-24	12.7303	61.9488	37.3395	-2.29437	0.494506	-4.63972	3.48882e-06	7.55588e-05
BnaC06G0375700ZS	DAP-147	DAP-24	1.00649	16.598	8.80224	-4.10973	0.885787	-4.63964	3.49016e-06	7.55588e-05
BnaA05G0414200ZS	DAP-147	DAP-24	5.81383	24.1348	14.9743	-2.05159	0.442203	-4.63949	3.49275e-06	7.55713e-05
BnaA05G0003400ZS	DAP-147	DAP-24	102.68	217.225	159.953	-1.07925	0.232667	-4.6386	3.50769e-06	7.58511e-05
BnaC07G0443200ZS	DAP-147	DAP-24	24.966	0.859527	12.9127	4.73443	1.02146	4.63498	3.56965e-06	7.71467e-05
BnaC03G0418500ZS	DAP-147	DAP-24	152.982	382.49	267.736	-1.32111	0.285155	-4.63295	3.60484e-06	7.78624e-05
BnaC04G0431600ZS	DAP-147	DAP-24	26.8416	5.87226	16.3569	2.15861	0.466175	4.63048	3.64814e-06	7.87525e-05
BnaC04G0418300ZS	DAP-147	DAP-24	37.883	7.47062	22.6768	2.32536	0.502225	4.63011	3.65473e-06	7.88497e-05
BnaC01G0074500ZS	DAP-147	DAP-24	67.9181	26.6388	47.2784	1.34449	0.290401	4.62977	3.66068e-06	7.89328e-05
BnaC06G0063400ZS	DAP-147	DAP-24	399.052	919.764	659.408	-1.20511	0.260361	-4.6286	3.68145e-06	7.93353e-05
BnaA06G0293400ZS	DAP-147	DAP-24	0.182116	12.4866	6.33436	-5.7605	1.24459	-4.62844	3.68428e-06	7.93509e-05
BnaA07G0073800ZS	DAP-147	DAP-24	11.251	34.3598	22.8054	-1.61555	0.34917	-4.62682	3.71321e-06	7.99284e-05
BnaC08G0061500ZS	DAP-147	DAP-24	17.3019	0.27667	8.7893	5.47511	1.1835	4.62619	3.72454e-06	8.01265e-05
BnaA01G0151300ZS	DAP-147	DAP-24	8.18824	28.7443	18.4663	-1.81842	0.393098	-4.62588	3.73019e-06	8.02023e-05
BnaC06G0360400ZS	DAP-147	DAP-24	11.9539	93.4314	52.6927	-2.97069	0.642379	-4.62451	3.75478e-06	8.06849e-05
BnaA03G0408500ZS	DAP-147	DAP-24	200.864	413.998	307.431	-1.04296	0.225567	-4.62373	3.76898e-06	8.0944e-05
BnaA01G0417600ZS	DAP-147	DAP-24	76.8115	21.8282	49.3198	1.8095	0.391428	4.6228	3.7859e-06	8.12526e-05
BnaC01G0396900ZS	DAP-147	DAP-24	2.98733	17.487	10.2372	-2.54145	0.549785	-4.62262	3.78919e-06	8.12526e-05
BnaA03G0189600ZS	DAP-147	DAP-24	24.6406	68.436	46.5383	-1.47546	0.31919	-4.62253	3.79089e-06	8.12526e-05
BnaA10G0121100ZS	DAP-147	DAP-24	4.32921	20.5932	12.4612	-2.24388	0.485429	-4.62247	3.79198e-06	8.12526e-05
BnaC03G0750400ZS	DAP-147	DAP-24	19.0826	1.01551	10.0491	4.30633	0.93217	4.61968	3.84328e-06	8.23052e-05
BnaC04G0259100ZS	DAP-147	DAP-24	0.192861	12.3029	6.24786	-5.74189	1.24312	-4.61892	3.8575e-06	8.25628e-05
BnaA08G0037900ZS	DAP-147	DAP-24	1.1886	16.6924	8.94051	-3.85313	0.834263	-4.6186	3.86339e-06	8.26419e-05
BnaA06G0361600ZS	DAP-147	DAP-24	14.7633	39.0369	26.9001	-1.40384	0.304043	-4.61724	3.88878e-06	8.31379e-05
BnaC04G0286800ZS	DAP-147	DAP-24	9.10202	30.534	19.818	-1.74102	0.37729	-4.61455	3.93952e-06	8.41749e-05
BnaC02G0237800ZS	DAP-147	DAP-24	56.2566	18.8954	37.576	1.5997	0.346794	4.61283	3.97228e-06	8.48267e-05
BnaC03G0220200ZS	DAP-147	DAP-24	0	8.0965	4.04825	-5.85908	1.27033	-4.61225	3.98338e-06	8.49906e-05
BnaA05G0493700ZS	DAP-147	DAP-24	0.203407	12.2703	6.23685	-5.73222	1.24287	-4.6121	3.98624e-06	8.49906e-05
BnaC04G0562700ZS	DAP-147	DAP-24	14.0196	0	7.00978	5.89349	1.27784	4.61207	3.98672e-06	8.49906e-05
BnaA08G0267600ZS	DAP-147	DAP-24	37.5215	10.4792	24.0004	1.86367	0.404212	4.61063	4.01452e-06	8.55349e-05
BnaA04G0211400ZS	DAP-147	DAP-24	1.71309	15.7071	8.71009	-3.19544	0.693086	-4.61045	4.01807e-06	8.55621e-05
BnaA09G0166800ZS	DAP-147	DAP-24	6.68533	26.2537	16.4695	-1.9761	0.428812	-4.60831	4.05955e-06	8.63966e-05
BnaA05G0141600ZS	DAP-147	DAP-24	32.9488	6.20088	19.5748	2.38781	0.518169	4.60817	4.06236e-06	8.64078e-05
BnaC01G0260400ZS	DAP-147	DAP-24	20.8641	1.26974	11.0669	4.03322	0.876256	4.60278	4.1688e-06	8.86216e-05
BnaA08G0105800ZS	DAP-147	DAP-24	72.524	203.431	137.977	-1.4895	0.323671	-4.60189	4.1868e-06	8.89541e-05
BnaA06G0375000ZS	DAP-147	DAP-24	1.71686	14.1857	7.9513	-3.06505	0.66616	-4.60107	4.20336e-06	8.92557e-05
BnaA10G0224500ZS	DAP-147	DAP-24	0.203407	12.2935	6.24845	-5.74222	1.24876	-4.59835	4.2585e-06	9.03756e-05
BnaA04G0022500ZS	DAP-147	DAP-24	0.203407	10.779	5.4912	-5.55821	1.20914	-4.59683	4.28967e-06	9.09859e-05
BnaC04G0172600ZS	DAP-147	DAP-24	111.893	42.9678	77.4305	1.38987	0.302418	4.59588	4.30929e-06	9.13505e-05
BnaA10G0209300ZS	DAP-147	DAP-24	0	9.05417	4.52708	-6.03161	1.31246	-4.59565	4.31408e-06	9.14007e-05
BnaC02G0160700ZS	DAP-147	DAP-24	3.66239	20.092	11.8772	-2.46767	0.537059	-4.5948	4.33172e-06	9.17229e-05
BnaA03G0186400ZS	DAP-147	DAP-24	33.4919	4.33936	18.9156	2.9837	0.649542	4.59354	4.35786e-06	9.22248e-05
BnaC05G0542100ZS	DAP-147	DAP-24	22.0663	3.57034	12.8183	2.64282	0.575398	4.59303	4.36855e-06	9.2399e-05
BnaA08G0307200ZS	DAP-147	DAP-24	140.024	46.033	93.0285	1.61301	0.351234	4.5924	4.38178e-06	9.26269e-05
BnaA02G0072900ZS	DAP-147	DAP-24	28.9903	0.27667	14.6335	6.21896	1.35425	4.59218	4.38633e-06	9.26711e-05
BnaC03G0556600ZS	DAP-147	DAP-24	3.36908	18.6213	10.9952	-2.45657	0.535006	-4.59167	4.3972e-06	9.28487e-05
BnaC04G0095700ZS	DAP-147	DAP-24	16.1685	0.27667	8.22259	5.37791	1.17155	4.59044	4.42319e-06	9.33451e-05
BnaA09G0687600ZS	DAP-147	DAP-24	1.12096	16.4118	8.76639	-3.87145	0.843591	-4.58925	4.44848e-06	9.38263e-05
BnaC07G0175800ZS	DAP-147	DAP-24	0	8.08942	4.04471	-5.8579	1.27651	-4.58901	4.4535e-06	9.38486e-05
BnaC08G0369900ZS	DAP-147	DAP-24	33.2673	10.1217	21.6945	1.70875	0.372361	4.58896	4.45451e-06	9.38486e-05
BnaA06G0142900ZS	DAP-147	DAP-24	22.0726	54.5788	38.3257	-1.29843	0.28314	-4.58581	4.52238e-06	9.52252e-05
BnaC03G0370200ZS	DAP-147	DAP-24	1.76322	18.0436	9.90342	-3.38127	0.737829	-4.58273	4.58939e-06	9.65821e-05
BnaC03G0670100ZS	DAP-147	DAP-24	0.599675	14.0124	7.30605	-4.61689	1.0078	-4.58117	4.62384e-06	9.72528e-05
BnaA04G0004000ZS	DAP-147	DAP-24	37.534	9.57483	23.5544	1.99803	0.436215	4.58037	4.64148e-06	9.75693e-05
BnaA03G0261100ZS	DAP-147	DAP-24	27.5752	6.37101	16.9731	2.11011	0.460852	4.57871	4.67861e-06	9.8295e-05
BnaA01G0429500ZS	DAP-147	DAP-24	0	8.35128	4.17564	-5.90644	1.2902	-4.57793	4.69595e-06	9.86046e-05
BnaC08G0386000ZS	DAP-147	DAP-24	0.203407	10.8298	5.51658	-5.5525	1.21312	-4.57703	4.7163e-06	9.89767e-05
BnaA02G0137700ZS	DAP-147	DAP-24	50.1679	18.8237	34.4958	1.41481	0.309168	4.5762	4.735e-06	9.9285e-05
BnaA09G0020600ZS	DAP-147	DAP-24	140.292	30.48	85.3862	2.19964	0.480674	4.57614	4.73626e-06	9.9285e-05
BnaA01G0428500ZS	DAP-147	DAP-24	24.2613	5.18352	14.7224	2.2428	0.490311	4.57424	4.77943e-06	0.000100134
Bnascaffold0027G0000800ZS	DAP-147	DAP-24	0	8.14846	4.07423	-5.86641	1.28254	-4.57405	4.78394e-06	0.000100173
BnaC09G0599500ZS	DAP-147	DAP-24	18.6145	2.1517	10.3831	3.06888	0.671023	4.57343	4.79808e-06	0.000100413
BnaA09G0495900ZS	DAP-147	DAP-24	49.0329	177.594	113.314	-1.8577	0.406276	-4.57251	4.81918e-06	0.000100799
BnaA06G0006000ZS	DAP-147	DAP-24	5.27183	21.9227	13.5973	-2.04882	0.448213	-4.57108	4.85211e-06	0.000101431
BnaC06G0076100ZS	DAP-147	DAP-24	62.428	21.9518	42.1899	1.51278	0.330997	4.57036	4.86882e-06	0.000101724
BnaA03G0529000ZS	DAP-147	DAP-24	41.1932	10.8387	26.0159	1.92776	0.421843	4.56987	4.88033e-06	0.000101908
BnaA07G0362600ZS	DAP-147	DAP-24	21.2029	0.553341	10.8781	5.0604	1.10763	4.56869	4.90789e-06	0.000102427
BnaC01G0388800ZS	DAP-147	DAP-24	0.792536	22.0316	11.4121	-4.83348	1.05816	-4.56783	4.92803e-06	0.00010279
BnaA02G0081800ZS	DAP-147	DAP-24	11.3652	33.6935	22.5294	-1.5685	0.343455	-4.56683	4.9515e-06	0.000103143
BnaC01G0172600ZS	DAP-147	DAP-24	0	11.8736	5.93679	-6.40675	1.40289	-4.56683	4.95161e-06	0.000103143
BnaA09G0717200ZS	DAP-147	DAP-24	10.2365	32.7666	21.5016	-1.67419	0.366603	-4.56676	4.95315e-06	0.000103143
BnaC04G0192000ZS	DAP-147	DAP-24	85.8701	32.5632	59.2166	1.41505	0.309903	4.56609	4.96913e-06	0.000103419
BnaA04G0137400ZS	DAP-147	DAP-24	64.2196	128.672	96.4458	-1.00129	0.219297	-4.5659	4.97347e-06	0.000103452
BnaC05G0094500ZS	DAP-147	DAP-24	27.9009	5.0795	16.4902	2.45545	0.538071	4.56344	5.03231e-06	0.000104618
BnaA03G0156800ZS	DAP-147	DAP-24	0	8.14976	4.07488	-5.88002	1.28879	-4.56243	5.05653e-06	0.00010501
BnaC03G0258500ZS	DAP-147	DAP-24	0	7.9476	3.9738	-5.83916	1.27984	-4.56242	5.05675e-06	0.00010501
BnaC08G0447300ZS	DAP-147	DAP-24	0.935071	15.3302	8.13263	-4.0386	0.885297	-4.56186	5.0702e-06	0.000105232
BnaA09G0516700ZS	DAP-147	DAP-24	9.10879	29.2226	19.1657	-1.68922	0.370346	-4.56119	5.08649e-06	0.000105512
BnaA03G0340600ZS	DAP-147	DAP-24	8.714	41.1713	24.9427	-2.25298	0.49419	-4.55892	5.14162e-06	0.00010654
BnaA08G0242000ZS	DAP-147	DAP-24	0	7.88083	3.94041	-5.82988	1.27879	-4.55892	5.1417e-06	0.00010654
BnaA09G0528600ZS	DAP-147	DAP-24	1.2993	17.1089	9.20412	-3.71588	0.81517	-4.55841	5.15419e-06	0.00010674
BnaC09G0180600ZS	DAP-147	DAP-24	524.831	1405.2	965.017	-1.4207	0.311715	-4.55768	5.17219e-06	0.000107054
BnaA10G0116100ZS	DAP-147	DAP-24	41.1618	14.5221	27.842	1.49421	0.32786	4.55746	5.17765e-06	0.000107108
BnaA01G0037500ZS	DAP-147	DAP-24	9.26585	29.7669	19.5164	-1.69032	0.371115	-4.55471	5.24573e-06	0.000108438
BnaA06G0179600ZS	DAP-147	DAP-24	0.767473	14.8994	7.83344	-4.28612	0.941046	-4.55463	5.24768e-06	0.000108438
BnaC02G0007600ZS	DAP-147	DAP-24	13.7566	42.5135	28.1351	-1.62907	0.357973	-4.55081	5.344e-06	0.000110368
BnaC06G0350400ZS	DAP-147	DAP-24	2.6199	16.1724	9.39616	-2.62154	0.576337	-4.54863	5.39954e-06	0.000111453
BnaA08G0020700ZS	DAP-147	DAP-24	2.96981	17.3439	10.1569	-2.52751	0.555738	-4.54803	5.41512e-06	0.000111714
BnaA02G0040000ZS	DAP-147	DAP-24	3.00872	46.845	24.9269	-3.98558	0.876594	-4.54666	5.45038e-06	0.00011238
BnaC04G0426700ZS	DAP-147	DAP-24	1.33511	13.2517	7.2934	-3.32905	0.732297	-4.54604	5.46657e-06	0.000112652
BnaA04G0131800ZS	DAP-147	DAP-24	373.238	2195.75	1284.5	-2.55682	0.562489	-4.54555	5.47918e-06	0.00011285
BnaC01G0223100ZS	DAP-147	DAP-24	2.09861	15.5877	8.84316	-2.89628	0.637287	-4.54471	5.50117e-06	0.000113241
BnaC06G0303200ZS	DAP-147	DAP-24	31.5163	3.078	17.2971	3.3277	0.73237	4.54375	5.52629e-06	0.000113696
BnaC06G0391300ZS	DAP-147	DAP-24	69.0097	9.0838	39.0468	2.91813	0.642309	4.54319	5.54097e-06	0.000113936
BnaC04G0289300ZS	DAP-147	DAP-24	2.9911	17.0897	10.0404	-2.5004	0.550698	-4.54042	5.61432e-06	0.000115381
BnaA01G0421800ZS	DAP-147	DAP-24	27.3592	0	13.6796	6.85642	1.51097	4.53777	5.68524e-06	0.000116676
BnaA01G0020200ZS	DAP-147	DAP-24	8.92995	57.9283	33.4291	-2.69882	0.594748	-4.53776	5.68553e-06	0.000116676
BnaA03G0301900ZS	DAP-147	DAP-24	2.29147	17.8351	10.0633	-2.95866	0.652037	-4.53757	5.69057e-06	0.000116689
BnaA02G0163500ZS	DAP-147	DAP-24	0	11.2187	5.60935	-6.33958	1.39716	-4.53746	5.69345e-06	0.000116689
BnaA09G0486200ZS	DAP-147	DAP-24	24.0049	5.51215	14.7585	2.13809	0.471248	4.53709	5.70365e-06	0.000116835
BnaA06G0323900ZS	DAP-147	DAP-24	0.203407	11.7656	5.98452	-5.69081	1.25509	-4.53417	5.78298e-06	0.000118362
BnaC06G0165600ZS	DAP-147	DAP-24	1.11719	13.9412	7.5292	-3.63901	0.802584	-4.53412	5.78446e-06	0.000118362
BnaC03G0166700ZS	DAP-147	DAP-24	2.96256	24.6714	13.817	-3.08857	0.681213	-4.53392	5.78981e-06	0.000118407
BnaC02G0263200ZS	DAP-147	DAP-24	10.5122	37.5488	24.0305	-1.84344	0.406614	-4.53364	5.79764e-06	0.000118503
BnaA04G0191000ZS	DAP-147	DAP-24	0.599675	13.8622	7.23095	-4.59647	1.01442	-4.53111	5.86739e-06	0.000119848
BnaA06G0015800ZS	DAP-147	DAP-24	6.65707	24.7613	15.7092	-1.89799	0.418887	-4.53103	5.86981e-06	0.000119848
BnaC07G0268600ZS	DAP-147	DAP-24	4.36132	51.351	27.8562	-3.54554	0.782806	-4.52927	5.91881e-06	0.000120783
BnaC05G0088300ZS	DAP-147	DAP-24	4.16219	50.6142	27.3882	-3.59961	0.794955	-4.52806	5.95265e-06	0.000121408
BnaA01G0033700ZS	DAP-147	DAP-24	19.764	56.4823	38.1231	-1.5057	0.333016	-4.52142	6.14268e-06	0.000125216
BnaA01G0134100ZS	DAP-147	DAP-24	0	9.98951	4.99475	-6.17877	1.36674	-4.5208	6.16074e-06	0.000125516
BnaA10G0157500ZS	DAP-147	DAP-24	62.3903	21.9907	42.1905	1.5014	0.332135	4.52047	6.17031e-06	0.000125643
BnaC06G0428100ZS	DAP-147	DAP-24	0.588929	16.1975	8.3932	-4.83618	1.07004	-4.51964	6.19455e-06	0.000126068
BnaC07G0506400ZS	DAP-147	DAP-24	0.192861	11.4711	5.83198	-5.63839	1.24776	-4.5188	6.21902e-06	0.000126491
BnaA01G0015400ZS	DAP-147	DAP-24	53.7782	11.5205	32.6493	2.21099	0.489298	4.5187	6.222e-06	0.000126491
BnaC01G0271700ZS	DAP-147	DAP-24	50.0687	20.3263	35.1975	1.29557	0.286825	4.51694	6.27393e-06	0.000127477
BnaA08G0260500ZS	DAP-147	DAP-24	34.1718	1.35187	17.7619	4.71498	1.04398	4.51633	6.29209e-06	0.000127778
BnaA10G0253900ZS	DAP-147	DAP-24	1.13848	14.3571	7.74777	-3.67162	0.81332	-4.51436	6.35081e-06	0.000128901
BnaC07G0418400ZS	DAP-147	DAP-24	14.2957	38.1157	26.2057	-1.40588	0.31158	-4.5121	6.41885e-06	0.000130211
BnaC03G0333800ZS	DAP-147	DAP-24	19.2666	54.0514	36.659	-1.49521	0.331459	-4.51098	6.45274e-06	0.000130828
BnaC03G0272400ZS	DAP-147	DAP-24	105.617	41.1494	73.3832	1.36069	0.301817	4.50832	6.53443e-06	0.000132414
BnaA10G0012200ZS	DAP-147	DAP-24	54.391	117.591	85.991	-1.10836	0.245913	-4.50711	6.57175e-06	0.000133098
BnaC04G0617000ZS	DAP-147	DAP-24	35.7651	7.16258	21.4638	2.33563	0.518448	4.50504	6.63598e-06	0.000134327
BnaC02G0247200ZS	DAP-147	DAP-24	6.67876	24.7106	15.6947	-1.90087	0.422027	-4.50414	6.66435e-06	0.000134829
BnaC09G0554100ZS	DAP-147	DAP-24	20.7633	2.95023	11.8568	2.84357	0.631392	4.50365	6.67955e-06	0.000135064
BnaC06G0063100ZS	DAP-147	DAP-24	8.00215	27.8033	17.9027	-1.80981	0.401865	-4.50352	6.68384e-06	0.000135066
BnaC01G0455600ZS	DAP-147	DAP-24	257.824	946.872	602.348	-1.87718	0.416844	-4.50333	6.68984e-06	0.000135066
BnaA09G0221000ZS	DAP-147	DAP-24	1.10644	16.2666	8.68653	-3.85066	0.855074	-4.50331	6.69042e-06	0.000135066
BnaA09G0035000ZS	DAP-147	DAP-24	63.3847	5.70854	34.5466	3.44474	0.765313	4.50109	6.76063e-06	0.000136411
BnaA09G0142600ZS	DAP-147	DAP-24	4.95095	22.9139	13.9324	-2.20707	0.490457	-4.50004	6.79406e-06	0.000137012
BnaC08G0360100ZS	DAP-147	DAP-24	1.53475	14.1478	7.84128	-3.22908	0.718008	-4.49727	6.88304e-06	0.000138732
BnaC09G0119700ZS	DAP-147	DAP-24	37.2942	10.7419	24.018	1.78842	0.397753	4.49632	6.91391e-06	0.00013928
BnaC08G0509900ZS	DAP-147	DAP-24	241.649	47.1929	144.421	2.35761	0.524396	4.49586	6.92907e-06	0.000139452
BnaC04G0288700ZS	DAP-147	DAP-24	0.203407	11.4819	5.84264	-5.6549	1.25781	-4.49583	6.92986e-06	0.000139452
BnaA10G0230900ZS	DAP-147	DAP-24	0	8.74864	4.37432	-5.9812	1.33046	-4.49558	6.93795e-06	0.00013954
BnaA01G0394700ZS	DAP-147	DAP-24	0.396268	13.3409	6.86859	-5.14111	1.14385	-4.49458	6.97072e-06	0.000140125
BnaC07G0103600ZS	DAP-147	DAP-24	25.8769	5.44538	15.6611	2.24911	0.500561	4.49318	7.01675e-06	0.000140975
BnaC07G0303400ZS	DAP-147	DAP-24	24.229	4.17564	14.2023	2.5462	0.566908	4.49138	7.07637e-06	0.000142028
BnaA09G0662300ZS	DAP-147	DAP-24	72.514	2.48033	37.4972	4.85395	1.08073	4.49137	7.07672e-06	0.000142028
BnaC08G0212400ZS	DAP-147	DAP-24	1.17806	14.1016	7.63985	-3.62206	0.806492	-4.49113	7.08468e-06	0.000142112
BnaC06G0311300ZS	DAP-147	DAP-24	0.203407	10.9209	5.56216	-5.58215	1.24299	-4.4909	7.09212e-06	0.000142186
BnaC08G0401600ZS	DAP-147	DAP-24	40.1597	13.8647	27.0122	1.52449	0.339762	4.48693	7.22573e-06	0.000144787
BnaA09G0067400ZS	DAP-147	DAP-24	43.7067	227.498	135.602	-2.38227	0.531141	-4.48519	7.28488e-06	0.000145895
BnaC02G0068100ZS	DAP-147	DAP-24	0.203407	9.79312	4.99826	-5.42161	1.20942	-4.4828	7.36695e-06	0.00014746
BnaA09G0041900ZS	DAP-147	DAP-24	42.4661	6.11167	24.2889	2.77056	0.618297	4.48095	7.43108e-06	0.000148633
BnaC04G0216000ZS	DAP-147	DAP-24	1.33134	13.3242	7.32779	-3.32378	0.741768	-4.48088	7.43343e-06	0.000148633
BnaC08G0258100ZS	DAP-147	DAP-24	1.153	12.4294	6.79121	-3.45206	0.770479	-4.48041	7.44998e-06	0.000148885
BnaA02G0018600ZS	DAP-147	DAP-24	22.4085	49.9578	36.1831	-1.15746	0.258453	-4.47841	7.51999e-06	0.000150205
BnaC06G0368000ZS	DAP-147	DAP-24	0.599675	14.0143	7.30698	-4.62178	1.03214	-4.47787	7.53914e-06	0.000150507
BnaC02G0494600ZS	DAP-147	DAP-24	3.84868	23.1411	13.4949	-2.59979	0.580721	-4.47683	7.57596e-06	0.000151162
BnaA06G0074600ZS	DAP-147	DAP-24	0	8.53742	4.26871	-5.94379	1.32817	-4.47518	7.63486e-06	0.000152257
BnaA10G0277700ZS	DAP-147	DAP-24	46.2649	112.148	79.2066	-1.27551	0.285111	-4.47372	7.68716e-06	0.000153219
BnaC09G0465800ZS	DAP-147	DAP-24	31.8106	71.4999	51.6552	-1.16314	0.260013	-4.47338	7.69919e-06	0.000153377
BnaA03G0519500ZS	DAP-147	DAP-24	62.2383	7.69522	34.9668	2.99998	0.670953	4.47122	7.77759e-06	0.000154857
BnaC08G0410100ZS	DAP-147	DAP-24	2.60935	17.4017	10.0055	-2.71466	0.607274	-4.47024	7.81332e-06	0.000155454
BnaA10G0024500ZS	DAP-147	DAP-24	0.203407	10.4125	5.30794	-5.49874	1.2302	-4.46978	7.83005e-06	0.000155655
BnaC03G0151100ZS	DAP-147	DAP-24	34.6634	6.39411	20.5287	2.44252	0.546474	4.4696	7.83653e-06	0.000155702
BnaA04G0229700ZS	DAP-147	DAP-24	0.406813	13.6324	7.0196	-5.17228	1.15806	-4.46633	7.95746e-06	0.000158021
BnaC02G0290500ZS	DAP-147	DAP-24	466.178	58.1707	262.175	2.9991	0.671643	4.46531	7.99511e-06	0.000158685
BnaA01G0008200ZS	DAP-147	DAP-24	2.29147	19.3563	10.8239	-3.0997	0.694225	-4.46498	8.00752e-06	0.000158848
BnaC05G0049100ZS	DAP-147	DAP-24	70.5074	254.923	162.715	-1.85614	0.415807	-4.46396	8.04599e-06	0.000159527
BnaA09G0422700ZS	DAP-147	DAP-24	3.44824	17.5089	10.4786	-2.36013	0.528929	-4.46209	8.11652e-06	0.000160841
BnaC02G0050100ZS	DAP-147	DAP-24	0.756728	12.1463	6.45153	-4.00679	0.898348	-4.46017	8.18928e-06	0.000162198
BnaA03G0357300ZS	DAP-147	DAP-24	55.4019	23.4781	39.44	1.23505	0.27692	4.45997	8.19715e-06	0.000162268
BnaC01G0473100ZS	DAP-147	DAP-24	1.33134	19.502	10.4167	-3.89175	0.873149	-4.45714	8.30605e-06	0.000164338
BnaA06G0358900ZS	DAP-147	DAP-24	2.08109	14.5221	8.3016	-2.81134	0.630783	-4.45691	8.31498e-06	0.000164428
BnaA04G0230500ZS	DAP-147	DAP-24	72.297	19.9771	46.137	1.84678	0.414734	4.45292	8.4712e-06	0.000167429
BnaA06G0378400ZS	DAP-147	DAP-24	6.16055	23.3792	14.7699	-1.91379	0.429814	-4.45259	8.4839e-06	0.000167593
BnaC08G0138500ZS	DAP-147	DAP-24	0	8.27556	4.13778	-5.89723	1.32479	-4.45146	8.52896e-06	0.000168348
BnaC01G0114800ZS	DAP-147	DAP-24	82.3209	14.4713	48.3961	2.49575	0.560667	4.4514	8.53106e-06	0.000168348
BnaA03G0248500ZS	DAP-147	DAP-24	18.2998	47.1589	32.7294	-1.37296	0.30845	-4.45117	8.54019e-06	0.00016844
BnaC01G0111900ZS	DAP-147	DAP-24	17.5543	1.29218	9.42325	3.78107	0.849488	4.451	8.54715e-06	0.000168489
BnaA06G0408900ZS	DAP-147	DAP-24	4.97941	24.3106	14.645	-2.29326	0.515313	-4.45024	8.57749e-06	0.000168973
BnaC07G0169100ZS	DAP-147	DAP-24	1.16354	13.0861	7.12483	-3.52195	0.791422	-4.45016	8.58065e-06	0.000168973
BnaA05G0089900ZS	DAP-147	DAP-24	31.4918	6.45511	18.9735	2.25709	0.507289	4.44931	8.6147e-06	0.000169466
BnaC09G0024100ZS	DAP-147	DAP-24	27.0586	6.27473	16.6667	2.08994	0.469832	4.44827	8.65658e-06	0.000170201
BnaA08G0093300ZS	DAP-147	DAP-24	26.0825	64.2264	45.1545	-1.29879	0.292003	-4.44785	8.67325e-06	0.00017044
BnaA08G0206100ZS	DAP-147	DAP-24	13.671	40.8156	27.2433	-1.58906	0.357401	-4.44614	8.74282e-06	0.000171717
BnaA05G0448900ZS	DAP-147	DAP-24	39.8409	88.9027	64.3718	-1.16041	0.261035	-4.44541	8.77245e-06	0.00017221
BnaC02G0077700ZS	DAP-147	DAP-24	26.9494	6.98405	16.9667	1.93954	0.436374	4.44467	8.80284e-06	0.000172653
BnaA01G0123800ZS	DAP-147	DAP-24	45.1256	15.2385	30.182	1.56372	0.351822	4.44463	8.80419e-06	0.000172653
BnaA09G0572200ZS	DAP-147	DAP-24	26.0146	6.3196	16.1671	2.03109	0.456998	4.44442	8.81302e-06	0.000172736
BnaA08G0022500ZS	DAP-147	DAP-24	68.9111	16.3881	42.6496	2.07697	0.467384	4.44383	8.83724e-06	0.000173121
BnaA01G0007100ZS	DAP-147	DAP-24	51.3866	125.445	88.4157	-1.29322	0.291148	-4.44179	8.92146e-06	0.00017468
BnaC03G0452300ZS	DAP-147	DAP-24	181.443	425.354	303.398	-1.23128	0.277382	-4.43893	9.04073e-06	0.000176923
BnaA07G0015400ZS	DAP-147	DAP-24	52.1755	8.29693	30.2362	2.67362	0.602352	4.43863	9.05322e-06	0.000177076
BnaA04G0141200ZS	DAP-147	DAP-24	20.9378	3.36175	12.1498	2.59072	0.583845	4.43733	9.10805e-06	0.000177963
BnaA02G0182000ZS	DAP-147	DAP-24	28.6961	157.396	93.0463	-2.45912	0.554321	-4.43628	9.15279e-06	0.000178745
BnaC02G0455300ZS	DAP-147	DAP-24	585.986	176.337	381.161	1.73337	0.390786	4.43559	9.18186e-06	0.00017922
BnaA09G0043500ZS	DAP-147	DAP-24	0	7.87179	3.93589	-5.81515	1.31108	-4.43539	9.19066e-06	0.000179299
BnaA03G0518400ZS	DAP-147	DAP-24	2.68774	16.1782	9.43296	-2.59958	0.586162	-4.43492	9.21057e-06	0.000179594
BnaC02G0299400ZS	DAP-147	DAP-24	19.2095	0.64255	9.92604	4.91198	1.10817	4.43251	9.31409e-06	0.000181519
BnaC09G0573400ZS	DAP-147	DAP-24	0.781791	13.8687	7.32522	-4.17691	0.942466	-4.4319	9.34072e-06	0.000181944
BnaA05G0386200ZS	DAP-147	DAP-24	0.203407	10.0236	5.11351	-5.44647	1.22904	-4.43147	9.3594e-06	0.000182213
BnaA10G0013000ZS	DAP-147	DAP-24	0.396268	14.0182	7.20723	-5.20283	1.17428	-4.43067	9.39414e-06	0.000182795
BnaC07G0488700ZS	DAP-147	DAP-24	2.11313	14.5144	8.31374	-2.80419	0.632947	-4.43037	9.40717e-06	0.000182949
BnaC07G0461400ZS	DAP-147	DAP-24	33.6825	86.0827	59.8826	-1.35535	0.305929	-4.43027	9.41173e-06	0.000182949
BnaA03G0066400ZS	DAP-147	DAP-24	3.96905	37.6188	20.7939	-3.26808	0.737749	-4.4298	9.432e-06	0.000183248
BnaC08G0247600ZS	DAP-147	DAP-24	0.203407	11.3664	5.78492	-5.62001	1.26895	-4.42888	9.47232e-06	0.000183937
BnaA01G0015500ZS	DAP-147	DAP-24	37.1012	7.5008	22.301	2.29389	0.518034	4.42806	9.50856e-06	0.000184545
BnaC02G0271300ZS	DAP-147	DAP-24	15.9151	0.365879	8.14051	5.35523	1.20968	4.42698	9.55601e-06	0.000185359
BnaC05G0503700ZS	DAP-147	DAP-24	17.2689	1.87503	9.57195	3.17901	0.718114	4.42689	9.5603e-06	0.000185359
BnaA08G0052500ZS	DAP-147	DAP-24	15.1914	39.2313	27.2113	-1.36494	0.308365	-4.42638	9.58279e-06	0.000185699
BnaC05G0075700ZS	DAP-147	DAP-24	8.32778	29.6205	18.9741	-1.8431	0.416446	-4.42579	9.60885e-06	0.000186109
BnaC02G0277100ZS	DAP-147	DAP-24	21.0661	2.73456	11.9003	2.89613	0.654465	4.42518	9.63604e-06	0.000186539
BnaA10G0204600ZS	DAP-147	DAP-24	3.18726	37.5597	20.3735	-3.58474	0.810161	-4.42473	9.65647e-06	0.000186743
BnaC03G0046400ZS	DAP-147	DAP-24	23.7841	102.012	62.8979	-2.10316	0.475431	-4.4237	9.70248e-06	0.000187536
BnaA09G0452400ZS	DAP-147	DAP-24	8.08102	29.5574	18.8192	-1.86525	0.421703	-4.42314	9.72752e-06	0.000187924
BnaA02G0296800ZS	DAP-147	DAP-24	80.0818	37.8359	58.9588	1.07794	0.243742	4.42248	9.75752e-06	0.000188407
BnaA03G0486800ZS	DAP-147	DAP-24	17.1832	0.91922	9.05123	4.17201	0.943868	4.42011	9.86486e-06	0.000190382
BnaC09G0268600ZS	DAP-147	DAP-24	53.618	147.512	100.565	-1.46229	0.330851	-4.41979	9.87977e-06	0.000190572
BnaA05G0416300ZS	DAP-147	DAP-24	1.48142	20.3494	10.9154	-3.75348	0.849633	-4.41777	9.97239e-06	0.00019226
BnaC01G0399200ZS	DAP-147	DAP-24	1.17826	20.7326	10.9554	-4.17162	0.944507	-4.41671	1.00213e-05	0.000193104
BnaA01G0305000ZS	DAP-147	DAP-24	16.0829	0.27667	8.17981	5.3704	1.21602	4.41637	1.00371e-05	0.000193301
BnaA02G0377000ZS	DAP-147	DAP-24	0.203407	10.1943	5.19885	-5.46555	1.23759	-4.41627	1.00417e-05	0.000193301
BnaC09G0123200ZS	DAP-147	DAP-24	4.15484	19.7222	11.9385	-2.25713	0.511245	-4.41496	1.01029e-05	0.000194378
BnaC01G0241700ZS	DAP-147	DAP-24	1.50271	13.0418	7.27225	-3.11506	0.705621	-4.41463	1.01184e-05	0.000194578
BnaA07G0036100ZS	DAP-147	DAP-24	3.11962	19.6446	11.3821	-2.67807	0.606707	-4.4141	1.01431e-05	0.000194953
BnaC09G0088200ZS	DAP-147	DAP-24	0.203407	10.1346	5.169	-5.45914	1.23702	-4.41313	1.01888e-05	0.000195732
BnaA02G0323300ZS	DAP-147	DAP-24	21.427	4.09351	12.7603	2.37078	0.537274	4.41262	1.02129e-05	0.000196095
BnaA08G0158400ZS	DAP-147	DAP-24	0	19.4899	9.74493	-7.1262	1.61555	-4.411	1.02896e-05	0.000197384
BnaC04G0231700ZS	DAP-147	DAP-24	514.782	1098.49	806.635	-1.09403	0.248023	-4.41098	1.02905e-05	0.000197384
BnaC06G0265600ZS	DAP-147	DAP-24	4.24725	32.5297	18.3885	-2.93386	0.665155	-4.41079	1.02993e-05	0.000197452
BnaA09G0457400ZS	DAP-147	DAP-24	1.51346	12.9885	7.251	-3.09564	0.701895	-4.4104	1.03179e-05	0.000197709
BnaC05G0459700ZS	DAP-147	DAP-24	6.13956	25.3814	15.7605	-2.06289	0.467772	-4.41004	1.03352e-05	0.000197938
BnaC05G0287900ZS	DAP-147	DAP-24	4.70419	19.5104	12.1073	-2.04897	0.464669	-4.40954	1.03593e-05	0.000198299
BnaA08G0169300ZS	DAP-147	DAP-24	56.7104	23.2617	39.9861	1.27252	0.288649	4.40854	1.04071e-05	0.000199114
BnaC05G0514200ZS	DAP-147	DAP-24	47.8745	10.4523	29.1634	2.17463	0.493368	4.40773	1.04459e-05	0.000199755
BnaC05G0080000ZS	DAP-147	DAP-24	8.1562	26.4123	17.2843	-1.70188	0.38626	-4.40604	1.05276e-05	0.000201121
BnaA05G0139700ZS	DAP-147	DAP-24	1.39221	18.0609	9.72658	-3.74468	0.849909	-4.40597	1.05309e-05	0.000201121
BnaC09G0404900ZS	DAP-147	DAP-24	54.2304	22.2296	38.23	1.28137	0.290836	4.40582	1.05384e-05	0.000201121
BnaC05G0253000ZS	DAP-147	DAP-24	0.38175	12.7215	6.5516	-5.07617	1.15215	-4.40581	1.05387e-05	0.000201121
BnaA01G0105500ZS	DAP-147	DAP-24	24.0491	5.16163	14.6053	2.22975	0.506148	4.40533	1.05621e-05	0.000201466
BnaC08G0516800ZS	DAP-147	DAP-24	44.4303	10.5006	27.4655	2.09907	0.476576	4.40448	1.06037e-05	0.000202157
BnaC06G0342400ZS	DAP-147	DAP-24	1.153	16.4657	8.80936	-3.86484	0.878227	-4.40073	1.07887e-05	0.000205579
BnaA02G0342500ZS	DAP-147	DAP-24	28.4096	4.88496	16.6473	2.56028	0.581931	4.39962	1.08439e-05	0.000206526
BnaA01G0207300ZS	DAP-147	DAP-24	32.3743	6.71697	19.5456	2.23433	0.507892	4.39922	1.08638e-05	0.000206749
BnaC05G0442400ZS	DAP-147	DAP-24	379.562	146.722	263.142	1.3718	0.311831	4.39917	1.08665e-05	0.000206749
BnaC06G0425300ZS	DAP-147	DAP-24	10.0151	45.5547	27.7849	-2.18405	0.496519	-4.39872	1.08891e-05	0.000207075
BnaC03G0681600ZS	DAP-147	DAP-24	0.756728	12.3935	6.5751	-4.04919	0.921385	-4.39467	1.1094e-05	0.000210863
BnaA05G0012400ZS	DAP-147	DAP-24	21.5198	2.58435	12.0521	3.07319	0.699611	4.39271	1.11946e-05	0.000212668
BnaA03G0260400ZS	DAP-147	DAP-24	0	7.51495	3.75747	-5.76326	1.31258	-4.39079	1.1294e-05	0.000214449
BnaA03G0024000ZS	DAP-147	DAP-24	0.599675	13.115	6.85734	-4.50939	1.02707	-4.39053	1.13077e-05	0.000214601
BnaA08G0180500ZS	DAP-147	DAP-24	30.2252	9.07475	19.65	1.75179	0.399153	4.38876	1.14001e-05	0.000216245
BnaA10G0289300ZS	DAP-147	DAP-24	0.203407	9.44837	4.82589	-5.35762	1.22162	-4.38567	1.15629e-05	0.000219114
BnaA06G0369900ZS	DAP-147	DAP-24	1.95608	15.5081	8.73208	-3.0239	0.689547	-4.38534	1.15803e-05	0.000219334
BnaC02G0554900ZS	DAP-147	DAP-24	19.7326	2.71082	11.2217	2.92618	0.667302	4.38509	1.15938e-05	0.000219478
BnaA10G0162700ZS	DAP-147	DAP-24	0.578384	11.7496	6.164	-4.3736	0.99743	-4.38487	1.16054e-05	0.000219589
BnaC05G0085100ZS	DAP-147	DAP-24	0	7.54447	3.77223	-5.76772	1.31568	-4.38385	1.16602e-05	0.000220515
BnaA03G0125400ZS	DAP-147	DAP-24	9.38332	0	4.69166	5.31257	1.21235	4.38204	1.17572e-05	0.000222237
BnaC07G0384900ZS	DAP-147	DAP-24	9.9084	44.6575	27.2829	-2.18221	0.498045	-4.38156	1.17835e-05	0.000222623
BnaA05G0310600ZS	DAP-147	DAP-24	0	7.77484	3.88742	-5.80156	1.32442	-4.38046	1.1843e-05	0.000223635
BnaC07G0501100ZS	DAP-147	DAP-24	53.6121	13.5752	33.5937	1.96384	0.448338	4.38027	1.1853e-05	0.000223711
BnaA02G0077000ZS	DAP-147	DAP-24	0.203407	9.53822	4.87081	-5.3813	1.22884	-4.37918	1.19126e-05	0.000224723
BnaC07G0143000ZS	DAP-147	DAP-24	0.203407	9.21026	4.70683	-5.33097	1.21759	-4.37831	1.19602e-05	0.00022551
BnaA06G0357700ZS	DAP-147	DAP-24	0	7.39426	3.69713	-5.73136	1.30933	-4.37731	1.2015e-05	0.00022643
BnaA07G0140800ZS	DAP-147	DAP-24	25.9546	6.74463	16.3496	1.94803	0.445092	4.37669	1.20497e-05	0.000226969
BnaA04G0260000ZS	DAP-147	DAP-24	24.6637	3.86945	14.2666	2.67931	0.612329	4.37561	1.21095e-05	0.000227982
BnaA02G0124700ZS	DAP-147	DAP-24	1.17806	13.2575	7.21776	-3.52922	0.806846	-4.3741	1.21934e-05	0.000229447
BnaA09G0462400ZS	DAP-147	DAP-24	0.203407	9.22562	4.71451	-5.33222	1.21939	-4.37284	1.22638e-05	0.000230657
BnaC08G0340100ZS	DAP-147	DAP-24	3.67671	19.323	11.4998	-2.4113	0.551495	-4.3723	1.22943e-05	0.000231115
BnaC05G0202900ZS	DAP-147	DAP-24	10.75	0	5.37498	5.51062	1.26046	4.37193	1.23156e-05	0.00023134
BnaA09G0681300ZS	DAP-147	DAP-24	20.2164	133.178	76.6974	-2.72446	0.623179	-4.37187	1.23186e-05	0.00023134
BnaC06G0442400ZS	DAP-147	DAP-24	114.623	323.501	219.062	-1.4977	0.342875	-4.36807	1.25352e-05	0.000235291
BnaA03G0445900ZS	DAP-147	DAP-24	16.5808	0.926297	8.75353	4.11857	0.942974	4.36764	1.25597e-05	0.000235634
BnaC07G0480100ZS	DAP-147	DAP-24	8.39959	29.9659	19.1828	-1.83436	0.420187	-4.36558	1.26788e-05	0.00023775
BnaC04G0025800ZS	DAP-147	DAP-24	174.428	21.1395	97.7835	3.04288	0.697049	4.36538	1.26902e-05	0.000237845
BnaC04G0579600ZS	DAP-147	DAP-24	28.3423	2.42837	15.3853	3.50424	0.802807	4.36498	1.27136e-05	0.000238166
BnaC01G0151400ZS	DAP-147	DAP-24	13.1677	39.1805	26.1741	-1.58425	0.363009	-4.36423	1.27574e-05	0.000238866
BnaC01G0354600ZS	DAP-147	DAP-24	44.3187	90.5018	67.4102	-1.02574	0.235084	-4.36329	1.2812e-05	0.000239769
BnaC08G0463500ZS	DAP-147	DAP-24	36.5551	7.53031	22.0427	2.26956	0.520387	4.36129	1.29295e-05	0.000241773
BnaA01G0405100ZS	DAP-147	DAP-24	16.7364	0.859527	8.79798	4.14479	0.950365	4.36126	1.29318e-05	0.000241773
BnaC03G0360500ZS	DAP-147	DAP-24	2.28073	14.7833	8.53201	-2.71129	0.621698	-4.3611	1.29412e-05	0.000241827
BnaC02G0511200ZS	DAP-147	DAP-24	17.8857	0.985991	9.43586	4.22028	0.968183	4.35897	1.30676e-05	0.000243948
BnaC01G0142600ZS	DAP-147	DAP-24	24.1258	5.38568	14.7558	2.15816	0.495269	4.35756	1.31522e-05	0.000245406
BnaA07G0175300ZS	DAP-147	DAP-24	0.396268	13.0591	6.7277	-5.1161	1.17414	-4.35732	1.31665e-05	0.000245551
BnaC06G0384500ZS	DAP-147	DAP-24	41.4581	12.1175	26.7878	1.75631	0.403093	4.35708	1.31809e-05	0.000245699
[truncated: 3,513 more rows]

## Sheet: Table S9
Table S9. Differentially expressed genes in two semi-winter cultivars Gangan and ZS11 before and after vernalization
GeneID	Sample A	Sample B	Base mean A	Base mean B	Base mean	log2FoldChange	lfcSE	Stat	P value	Padj
BnaC03G0243700ZS	DAP-147	DAP-24	2543.81	26.6175	1285.21	6.58131	0.218318	30.1455	1.22915e-199	4.81618e-195
BnaC02G0071800ZS	DAP-147	DAP-24	3497.25	19.0804	1758.16	7.53117	0.291286	25.8549	2.1413e-147	4.19512e-143
BnaA03G0206900ZS	DAP-147	DAP-24	2473.57	11.7142	1242.64	7.71293	0.312627	24.6714	2.17068e-134	2.83513e-130
BnaC03G0162000ZS	DAP-147	DAP-24	1494.21	14.6454	754.428	6.70668	0.287735	23.3086	3.6292e-120	3.55507e-116
BnaC03G0243500ZS	DAP-147	DAP-24	2515.02	10.8925	1262.96	7.8002	0.343929	22.6797	7.11467e-114	5.57548e-110
BnaA02G0062100ZS	DAP-147	DAP-24	1375.78	12.4445	694.11	6.79075	0.324258	20.9424	2.19913e-97	1.43614e-93
BnaA03G0206700ZS	DAP-147	DAP-24	2201.67	18.1702	1109.92	6.93034	0.340584	20.3484	4.79579e-92	2.68448e-88
BnaC04G0207500ZS	DAP-147	DAP-24	16.5215	529.001	272.761	-5.00937	0.263668	-18.9988	1.74561e-80	8.54976e-77
BnaA03G0438900ZS	DAP-147	DAP-24	1237.44	31.3277	634.386	5.30689	0.288422	18.3997	1.31998e-75	5.74677e-72
BnaC07G0413500ZS	DAP-147	DAP-24	946.317	20.2576	483.287	5.53868	0.30811	17.9763	2.98815e-72	1.17085e-68
BnaA01G0203600ZS	DAP-147	DAP-24	866.85	3.92137	435.386	7.84539	0.440324	17.8173	5.18748e-71	1.84783e-67
BnaC07G0297500ZS	DAP-147	DAP-24	14.9101	461.46	238.185	-4.96371	0.283542	-17.5061	1.28691e-68	4.20209e-65
BnaA02G0146000ZS	DAP-147	DAP-24	419.702	10.5471	215.125	5.30131	0.305534	17.351	1.93975e-67	5.84656e-64
BnaA06G0389600ZS	DAP-147	DAP-24	6.37874	645.938	326.159	-6.67435	0.384981	-17.3368	2.48072e-67	6.94301e-64
BnaA06G0152300ZS	DAP-147	DAP-24	16.1568	919.808	467.982	-5.8459	0.339466	-17.2209	1.85229e-66	4.83855e-63
BnaC02G0186200ZS	DAP-147	DAP-24	486.646	6.88064	246.763	6.13682	0.360418	17.027	5.18361e-65	1.26943e-61
BnaC08G0225700ZS	DAP-147	DAP-24	1463.29	127.061	795.174	3.53077	0.210334	16.7865	3.06599e-63	7.06675e-60
BnaC06G0083100ZS	DAP-147	DAP-24	446.953	6.23766	226.595	6.19719	0.371626	16.6759	1.96225e-62	4.27149e-59
BnaC06G0056100ZS	DAP-147	DAP-24	35.0042	1339.45	687.228	-5.26304	0.329348	-15.9802	1.75719e-57	3.6238e-54
BnaA08G0102300ZS	DAP-147	DAP-24	27.5552	844.153	435.854	-4.94764	0.313464	-15.7838	4.02346e-56	7.88256e-53
BnaC08G0147100ZS	DAP-147	DAP-24	25.1172	651.086	338.101	-4.70675	0.304675	-15.4484	7.72929e-54	1.44218e-50
BnaA05G0399100ZS	DAP-147	DAP-24	5.92675	333.236	169.582	-5.82275	0.377605	-15.4202	1.19704e-53	2.13199e-50
BnaA09G0161700ZS	DAP-147	DAP-24	3.16114	243.192	123.176	-6.26931	0.449118	-13.9592	2.76693e-44	4.71376e-41
BnaC01G0230400ZS	DAP-147	DAP-24	248.953	9.43868	129.196	4.74345	0.345718	13.7206	7.64316e-43	1.24784e-39
BnaC07G0067700ZS	DAP-147	DAP-24	302.964	30.788	166.876	3.30283	0.241084	13.6999	1.01665e-42	1.59342e-39
BnaA07G0357800ZS	DAP-147	DAP-24	27.7091	474.193	250.951	-4.09999	0.302526	-13.5526	7.65236e-42	1.15324e-38
BnaC05G0140200ZS	DAP-147	DAP-24	284.088	25.1136	154.601	3.49191	0.259172	13.4733	2.24514e-41	3.25819e-38
BnaA06G0114100ZS	DAP-147	DAP-24	185.137	20.8728	103.005	3.15394	0.234446	13.4527	2.9666e-41	4.15145e-38
BnaA10G0220100ZS	DAP-147	DAP-24	376.42	90.693	233.556	2.05542	0.152964	13.4373	3.65646e-41	4.94038e-38
BnaC03G0488000ZS	DAP-147	DAP-24	5.61181	151.004	78.3078	-4.78304	0.362897	-13.1802	1.1415e-39	1.49091e-36
BnaA08G0161600ZS	DAP-147	DAP-24	721.21	4229.68	2475.44	-2.55234	0.195977	-13.0237	8.97426e-39	1.13432e-35
BnaC03G0810100ZS	DAP-147	DAP-24	7.04149	229.276	118.159	-5.0394	0.387966	-12.9893	1.40722e-38	1.7231e-35
BnaC02G0454300ZS	DAP-147	DAP-24	10.5307	751.306	380.918	-6.17733	0.477459	-12.9379	2.74891e-38	3.26396e-35
BnaC07G0412300ZS	DAP-147	DAP-24	23.2632	1079.8	551.53	-5.54625	0.428939	-12.9302	3.04191e-38	3.50562e-35
BnaA03G0393800ZS	DAP-147	DAP-24	6.02793	138.602	72.3152	-4.55293	0.355884	-12.7933	1.78731e-37	1.96198e-34
BnaC07G0188700ZS	DAP-147	DAP-24	29.7814	251.981	140.881	-3.0882	0.241405	-12.7926	1.8026e-37	1.96198e-34
BnaC05G0437900ZS	DAP-147	DAP-24	58.6107	544.812	301.711	-3.21959	0.253788	-12.6862	7.05694e-37	7.4733e-34
BnaC04G0158800ZS	DAP-147	DAP-24	793.327	15.7981	404.563	5.64741	0.445587	12.6741	8.23006e-37	8.48627e-34
BnaC01G0367700ZS	DAP-147	DAP-24	1797.25	1.16694	899.207	10.602	0.843719	12.5658	3.25693e-36	3.27221e-33
BnaA03G0389200ZS	DAP-147	DAP-24	2.42972	199.292	100.861	-6.42108	0.512312	-12.5335	4.89264e-36	4.79271e-33
BnaC07G0231000ZS	DAP-147	DAP-24	13.2345	146.61	79.922	-3.4725	0.2782	-12.482	9.35537e-36	8.94077e-33
BnaC06G0342300ZS	DAP-147	DAP-24	200.705	5.0521	102.879	5.34582	0.429269	12.4533	1.34139e-35	1.25142e-32
BnaA01G0298400ZS	DAP-147	DAP-24	1581.84	0	790.919	12.855	1.03427	12.4291	1.81725e-35	1.65284e-32
BnaA09G0068700ZS	DAP-147	DAP-24	287.102	13.0046	150.053	4.48204	0.360658	12.4274	1.85603e-35	1.65284e-32
BnaA08G0131100ZS	DAP-147	DAP-24	100.439	495.364	297.902	-2.30369	0.186869	-12.3279	6.41225e-35	5.58336e-32
BnaC05G0422200ZS	DAP-147	DAP-24	2.19967	155.342	78.7706	-6.20422	0.506929	-12.2388	1.9282e-34	1.64245e-31
BnaA03G0483400ZS	DAP-147	DAP-24	40.2518	327.035	183.643	-3.02925	0.249094	-12.1611	5.00995e-34	4.1767e-31
BnaC04G0125000ZS	DAP-147	DAP-24	1665.87	10966.5	6316.17	-2.71879	0.226284	-12.015	2.96433e-33	2.41982e-30
BnaC05G0090200ZS	DAP-147	DAP-24	146.952	8.09048	77.5213	4.18576	0.348643	12.0059	3.30989e-33	2.64676e-30
BnaC06G0043700ZS	DAP-147	DAP-24	38.2402	203.766	121.003	-2.4208	0.202193	-11.9727	4.93753e-33	3.86934e-30
BnaA04G0290300ZS	DAP-147	DAP-24	32.9279	449.335	241.131	-3.77682	0.316397	-11.937	7.59404e-33	5.83446e-30
BnaC07G0224900ZS	DAP-147	DAP-24	3.77143	99.8596	51.8155	-4.72399	0.397052	-11.8976	1.21731e-32	9.1727e-30
BnaC09G0524700ZS	DAP-147	DAP-24	301.131	83.0298	192.081	1.86213	0.15764	11.8125	3.36226e-32	2.48573e-29
BnaC08G0180100ZS	DAP-147	DAP-24	629.878	3189.82	1909.85	-2.34056	0.198384	-11.7982	3.98921e-32	2.89461e-29
BnaC01G0037400ZS	DAP-147	DAP-24	18.0073	445.527	231.767	-4.63296	0.393523	-11.773	5.37619e-32	3.8301e-29
BnaC07G0137700ZS	DAP-147	DAP-24	1.93545	149.158	75.5468	-6.3	0.53571	-11.7601	6.2663e-32	4.38451e-29
BnaC01G0080000ZS	DAP-147	DAP-24	788.824	68.581	428.703	3.51968	0.299842	11.7384	8.09572e-32	5.56517e-29
BnaA07G0194700ZS	DAP-147	DAP-24	209.159	27.795	118.477	2.92932	0.250264	11.7049	1.20234e-31	8.12266e-29
BnaA07G0284300ZS	DAP-147	DAP-24	202.735	6.70853	104.722	4.9283	0.423857	11.6273	2.99536e-31	1.98927e-28
BnaA03G0437700ZS	DAP-147	DAP-24	65.3062	1480.32	772.814	-4.50633	0.387786	-11.6207	3.23621e-31	2.11341e-28
BnaA06G0003300ZS	DAP-147	DAP-24	160.272	1296.25	728.26	-3.01652	0.259679	-11.6163	3.4045e-31	2.18686e-28
BnaA09G0067400ZS	DAP-147	DAP-24	34.3627	211.162	122.762	-2.6208	0.225809	-11.6063	3.82946e-31	2.42016e-28
BnaA10G0022300ZS	DAP-147	DAP-24	2.83432	141.057	71.9458	-5.68062	0.491924	-11.5478	7.57565e-31	4.71169e-28
BnaA08G0028200ZS	DAP-147	DAP-24	31.4905	176.421	103.956	-2.49198	0.217448	-11.4601	2.09159e-30	1.28054e-27
BnaA03G0402300ZS	DAP-147	DAP-24	167.109	23.6245	95.3669	2.81207	0.24599	11.4317	2.90439e-30	1.75081e-27
BnaC09G0539300ZS	DAP-147	DAP-24	70.1765	450.537	260.357	-2.68342	0.236331	-11.3545	7.04517e-30	4.18259e-27
BnaC03G0566200ZS	DAP-147	DAP-24	6.71807	141.887	74.3026	-4.42911	0.391439	-11.3149	1.10668e-29	6.47212e-27
BnaC01G0100600ZS	DAP-147	DAP-24	253.257	1189.85	721.555	-2.23307	0.19767	-11.2969	1.35883e-29	7.82987e-27
BnaA07G0377700ZS	DAP-147	DAP-24	2.74465	145.272	74.0082	-5.73363	0.508186	-11.2825	1.60057e-29	9.08915e-27
BnaC01G0140000ZS	DAP-147	DAP-24	44.8802	304.513	174.697	-2.76676	0.245294	-11.2794	1.6592e-29	9.28747e-27
BnaA09G0107500ZS	DAP-147	DAP-24	10.4323	187.955	99.1937	-4.17972	0.370616	-11.2778	1.68961e-29	9.3245e-27
BnaC07G0230800ZS	DAP-147	DAP-24	16.8016	145.673	81.2371	-3.11921	0.278435	-11.2026	3.95731e-29	2.1536e-26
BnaA03G0484900ZS	DAP-147	DAP-24	2.42972	218.995	110.712	-6.54713	0.585095	-11.1899	4.57185e-29	2.45396e-26
BnaA08G0199700ZS	DAP-147	DAP-24	356.901	2309.99	1333.45	-2.69488	0.24091	-11.1862	4.76214e-29	2.52155e-26
BnaA02G0263300ZS	DAP-147	DAP-24	166.498	12.4333	89.4656	3.74579	0.335985	11.1487	7.2681e-29	3.79715e-26
BnaA06G0072500ZS	DAP-147	DAP-24	189.156	11.688	100.422	4.0271	0.362323	11.1147	1.0643e-28	5.48718e-26
BnaC01G0494300ZS	DAP-147	DAP-24	1.78356	225.439	113.611	-7.05105	0.635671	-11.0923	1.36747e-28	6.95864e-26
BnaA10G0031700ZS	DAP-147	DAP-24	31.0377	164.195	97.6162	-2.39997	0.217658	-11.0263	2.8524e-28	1.43289e-25
BnaA01G0083000ZS	DAP-147	DAP-24	332.178	1239.01	785.593	-1.89968	0.172833	-10.9914	4.20347e-28	2.08487e-25
BnaC06G0324700ZS	DAP-147	DAP-24	47.7932	251.257	149.525	-2.39332	0.218443	-10.9563	6.20103e-28	3.03719e-25
BnaA06G0024100ZS	DAP-147	DAP-24	12.5373	960.669	486.603	-6.27314	0.576021	-10.8905	1.27982e-27	6.19101e-25
BnaC04G0246000ZS	DAP-147	DAP-24	0	1022.89	511.447	-12.6914	1.16591	-10.8854	1.35301e-27	6.46523e-25
BnaC02G0283900ZS	DAP-147	DAP-24	4.18176	346.849	175.515	-6.40724	0.592381	-10.8161	2.88848e-27	1.3636e-24
BnaA08G0006500ZS	DAP-147	DAP-24	4.02148	125.359	64.6904	-4.97051	0.460973	-10.7826	4.15741e-27	1.93928e-24
BnaC04G0245700ZS	DAP-147	DAP-24	0	879.719	439.859	-12.4738	1.15709	-10.7803	4.26414e-27	1.96567e-24
BnaC03G0295500ZS	DAP-147	DAP-24	50.5169	311.104	180.81	-2.62722	0.24412	-10.762	5.20279e-27	2.37047e-24
BnaC07G0374000ZS	DAP-147	DAP-24	132.938	13.7558	73.3469	3.26814	0.307909	10.614	2.56565e-26	1.15552e-23
BnaA01G0011500ZS	DAP-147	DAP-24	9.00804	93.2737	51.1409	-3.36688	0.317902	-10.591	3.28228e-26	1.46147e-23
BnaA10G0182200ZS	DAP-147	DAP-24	4.01432	105.138	54.5763	-4.71945	0.448825	-10.5151	7.35692e-26	3.23894e-23
BnaA05G0100700ZS	DAP-147	DAP-24	670.87	3671.48	2171.17	-2.45225	0.233942	-10.4823	1.04202e-25	4.53659e-23
BnaA03G0562300ZS	DAP-147	DAP-24	1.07209	144.96	73.0161	-7.10845	0.678999	-10.469	1.19897e-25	5.16256e-23
BnaC09G0021800ZS	DAP-147	DAP-24	297.1	1808.12	1052.61	-2.60544	0.249497	-10.4428	1.58095e-25	6.73329e-23
BnaC08G0081200ZS	DAP-147	DAP-24	1297	4509.83	2903.41	-1.79796	0.172245	-10.4383	1.65666e-25	6.97987e-23
Bnascaffold0027G0029300ZS	DAP-147	DAP-24	1.57616	219.855	110.715	-7.20276	0.690345	-10.4336	1.74204e-25	7.26152e-23
BnaA07G0198300ZS	DAP-147	DAP-24	133.376	4.7161	69.0459	4.84509	0.46511	10.4171	2.07175e-25	8.54498e-23
BnaA07G0068500ZS	DAP-147	DAP-24	111.494	3.53702	57.5156	5.00471	0.481705	10.3896	2.76593e-25	1.12893e-22
BnaA03G0373800ZS	DAP-147	DAP-24	268.435	1.21529	134.825	7.85721	0.756928	10.3804	3.04538e-25	1.23018e-22
BnaA10G0105600ZS	DAP-147	DAP-24	1410.95	5547.57	3479.26	-1.97532	0.190394	-10.3749	3.22552e-25	1.28965e-22
BnaC04G0016400ZS	DAP-147	DAP-24	20.3318	148.251	84.2915	-2.87362	0.277176	-10.3675	3.48488e-25	1.36978e-22
BnaA01G0032400ZS	DAP-147	DAP-24	22.9567	355.774	189.365	-3.9582	0.3818	-10.3672	3.49584e-25	1.36978e-22
BnaA03G0317300ZS	DAP-147	DAP-24	5.38006	182.732	94.0562	-5.10396	0.494143	-10.3289	5.21552e-25	2.02336e-22
BnaC04G0575600ZS	DAP-147	DAP-24	35.0752	180.719	107.897	-2.37255	0.230062	-10.3127	6.17522e-25	2.37219e-22
BnaC03G0457300ZS	DAP-147	DAP-24	365.585	0	182.792	10.7418	1.04306	10.2984	7.16613e-25	2.72612e-22
BnaA08G0018800ZS	DAP-147	DAP-24	171.635	859.156	515.396	-2.32399	0.226048	-10.281	8.58466e-25	3.23435e-22
BnaC09G0117400ZS	DAP-147	DAP-24	3.17228	161.508	82.3404	-5.67633	0.55228	-10.278	8.8555e-25	3.30462e-22
BnaC05G0185400ZS	DAP-147	DAP-24	10.4371	209.413	109.925	-4.3465	0.424876	-10.23	1.45458e-24	5.37687e-22
BnaA05G0020000ZS	DAP-147	DAP-24	7.43125	248.759	128.095	-5.08772	0.499612	-10.1833	2.35373e-24	8.61927e-22
BnaC08G0361800ZS	DAP-147	DAP-24	170.922	20.8605	95.8913	3.05718	0.300884	10.1606	2.97112e-24	1.07794e-21
BnaA08G0057800ZS	DAP-147	DAP-24	1216.64	4414.44	2815.54	-1.85934	0.183021	-10.1591	3.01736e-24	1.08467e-21
BnaC06G0090200ZS	DAP-147	DAP-24	334.739	1923.02	1128.88	-2.52263	0.24851	-10.151	3.27959e-24	1.16822e-21
BnaA04G0096800ZS	DAP-147	DAP-24	263.689	17.7905	140.74	3.89516	0.384195	10.1385	3.7285e-24	1.31616e-21
BnaA02G0338000ZS	DAP-147	DAP-24	58.6328	1120.76	589.694	-4.26072	0.422642	-10.0811	6.69395e-24	2.34187e-21
BnaC07G0112300ZS	DAP-147	DAP-24	284.356	19.8899	152.123	3.84378	0.381738	10.0692	7.56245e-24	2.6223e-21
BnaC02G0485900ZS	DAP-147	DAP-24	10.9807	87.6105	49.2956	-3.00063	0.298949	-10.0373	1.04545e-23	3.59331e-21
BnaA05G0472300ZS	DAP-147	DAP-24	0.84204	157	78.9213	-7.54849	0.752115	-10.0363	1.05509e-23	3.59492e-21
BnaC03G0380700ZS	DAP-147	DAP-24	10.6573	109.885	60.2712	-3.3766	0.338723	-9.96864	2.09074e-23	7.06219e-21
BnaA05G0015900ZS	DAP-147	DAP-24	7.74618	87.5725	47.6593	-3.52256	0.354293	-9.94252	2.71874e-23	9.10499e-21
BnaC08G0205600ZS	DAP-147	DAP-24	93.423	6.05988	49.7414	4.00152	0.402711	9.93645	2.88931e-23	9.59422e-21
BnaA09G0079800ZS	DAP-147	DAP-24	3.41081	81.9426	42.6767	-4.60061	0.463881	-9.91765	3.48859e-23	1.14869e-20
BnaA07G0128300ZS	DAP-147	DAP-24	29.6177	170.539	100.079	-2.52794	0.255486	-9.89462	4.39265e-23	1.43431e-20
BnaC08G0439700ZS	DAP-147	DAP-24	312.594	0.922191	156.758	8.4927	0.86245	9.84718	7.04912e-23	2.28269e-20
BnaC04G0060400ZS	DAP-147	DAP-24	190.896	1.24605	96.071	7.36591	0.749043	9.83376	8.05544e-23	2.58718e-20
BnaC01G0209200ZS	DAP-147	DAP-24	376.834	55.1694	216.001	2.77923	0.283032	9.81949	9.28133e-23	2.95667e-20
BnaC03G0790700ZS	DAP-147	DAP-24	232.568	1084.9	658.736	-2.22212	0.226369	-9.81638	9.57169e-23	3.02458e-20
BnaA03G0345300ZS	DAP-147	DAP-24	0	201.57	100.785	-10.3476	1.05584	-9.80042	1.12121e-22	3.5146e-20
BnaC09G0366900ZS	DAP-147	DAP-24	1191.5	3733.51	2462.51	-1.64786	0.168378	-9.78668	1.28439e-22	3.99415e-20
BnaC01G0246600ZS	DAP-147	DAP-24	16.6348	122.808	69.7212	-2.89416	0.296493	-9.76133	1.64985e-22	5.07231e-20
BnaA06G0438400ZS	DAP-147	DAP-24	2.43953	113.379	57.9091	-5.59615	0.573324	-9.76089	1.65698e-22	5.07231e-20
BnaA08G0246600ZS	DAP-147	DAP-24	282.104	66.606	174.355	2.07907	0.21325	9.74947	1.85437e-22	5.63253e-20
BnaC04G0551600ZS	DAP-147	DAP-24	28.2717	413.633	220.952	-3.87398	0.398068	-9.73195	2.20323e-22	6.6407e-20
BnaA05G0469100ZS	DAP-147	DAP-24	6.86216	78.0189	42.4405	-3.49821	0.359918	-9.71947	2.49069e-22	7.44981e-20
BnaC04G0183400ZS	DAP-147	DAP-24	453.624	179.432	316.528	1.33916	0.137852	9.71445	2.61654e-22	7.76695e-20
BnaC02G0075000ZS	DAP-147	DAP-24	443.542	36.05	239.796	3.62556	0.375506	9.65512	4.67625e-22	1.37766e-19
BnaA09G0588200ZS	DAP-147	DAP-24	164.398	1.43031	82.9141	6.83326	0.709647	9.62909	6.02585e-22	1.76202e-19
BnaC02G0067600ZS	DAP-147	DAP-24	2.6256	144.979	73.8023	-5.82854	0.60544	-9.62695	6.15272e-22	1.78579e-19
BnaC08G0029300ZS	DAP-147	DAP-24	82.2465	9.79423	46.0204	3.06884	0.318905	9.62305	6.39085e-22	1.84127e-19
BnaC02G0509000ZS	DAP-147	DAP-24	1.33631	97.284	49.3101	-6.26459	0.651098	-9.62158	6.48304e-22	1.85268e-19
BnaC09G0593800ZS	DAP-147	DAP-24	96.1638	2.49951	49.3317	5.21579	0.54213	9.62091	6.52504e-22	1.85268e-19
BnaA08G0200700ZS	DAP-147	DAP-24	111.426	18.3305	64.878	2.5969	0.270438	9.60256	7.79858e-22	2.19836e-19
BnaC08G0314600ZS	DAP-147	DAP-24	112.026	4.8158	58.4208	4.52119	0.471061	9.59787	8.16131e-22	2.28418e-19
BnaA09G0625000ZS	DAP-147	DAP-24	360.003	1813.69	1086.85	-2.33334	0.244115	-9.55835	1.19644e-21	3.32482e-19
BnaC03G0038400ZS	DAP-147	DAP-24	12.7558	94.6011	53.6784	-2.90513	0.304535	-9.53958	1.43418e-21	3.95741e-19
BnaC08G0191900ZS	DAP-147	DAP-24	917.299	213.496	565.398	2.10117	0.221579	9.48269	2.47799e-21	6.78988e-19
BnaA10G0205400ZS	DAP-147	DAP-24	101.548	6.38919	53.9686	4.04266	0.427194	9.4633	2.98377e-21	8.11896e-19
BnaA02G0212500ZS	DAP-147	DAP-24	0.230048	322.534	161.382	-10.3052	1.09193	-9.4376	3.8142e-21	1.0307e-18
BnaA01G0337000ZS	DAP-147	DAP-24	42.5553	669.935	356.245	-3.97649	0.422002	-9.42292	4.38698e-21	1.17736e-18
BnaC07G0310100ZS	DAP-147	DAP-24	65.4551	395.866	230.66	-2.60131	0.276386	-9.41189	4.87313e-21	1.29894e-18
BnaC05G0046100ZS	DAP-147	DAP-24	197.384	32.0192	114.702	2.63879	0.280516	9.40693	5.10817e-21	1.35239e-18
BnaC03G0670700ZS	DAP-147	DAP-24	291.828	1617.2	954.514	-2.47132	0.263684	-9.37229	7.09761e-21	1.86648e-18
BnaC09G0619400ZS	DAP-147	DAP-24	252.952	1320.23	786.589	-2.38462	0.2547	-9.3625	7.78731e-21	2.0342e-18
BnaC03G0457600ZS	DAP-147	DAP-24	214.292	0	107.146	9.97124	1.06595	9.35434	8.41209e-21	2.18285e-18
BnaC04G0560400ZS	DAP-147	DAP-24	183.614	21.5307	102.572	3.08944	0.33069	9.3424	9.41733e-21	2.42763e-18
BnaA03G0165600ZS	DAP-147	DAP-24	1689.31	6829.8	4259.56	-2.01532	0.216544	-9.30672	1.31835e-20	3.37628e-18
BnaC04G0586700ZS	DAP-147	DAP-24	45.6885	169.364	107.526	-1.89319	0.20365	-9.29627	1.45458e-20	3.70096e-18
BnaC02G0070800ZS	DAP-147	DAP-24	1.97944	97.0331	49.5063	-5.66726	0.609911	-9.29193	1.51512e-20	3.83013e-18
BnaC03G0395600ZS	DAP-147	DAP-24	6.15717	65.3172	35.7372	-3.42055	0.368382	-9.28533	1.61212e-20	4.04588e-18
BnaC09G0154000ZS	DAP-147	DAP-24	89.1425	278.771	183.957	-1.64878	0.17758	-9.28473	1.62112e-20	4.04588e-18
BnaA03G0317500ZS	DAP-147	DAP-24	8.61595	235.703	122.16	-4.78607	0.51586	-9.27785	1.72935e-20	4.28868e-18
BnaC02G0357300ZS	DAP-147	DAP-24	127.942	10.5825	69.262	3.58974	0.387401	9.26622	1.92858e-20	4.75269e-18
BnaA09G0219200ZS	DAP-147	DAP-24	56.7695	241.957	149.363	-2.09144	0.22577	-9.26359	1.97666e-20	4.84071e-18
BnaC02G0411500ZS	DAP-147	DAP-24	81.6684	5.9138	43.7911	3.81376	0.411823	9.2607	2.031e-20	4.94289e-18
BnaA03G0239900ZS	DAP-147	DAP-24	100.75	375.883	238.317	-1.90184	0.20634	-9.21701	3.05508e-20	7.38933e-18
BnaC09G0277000ZS	DAP-147	DAP-24	175.622	42.9521	109.287	2.03993	0.221573	9.20658	3.3667e-20	8.09309e-18
BnaC03G0263400ZS	DAP-147	DAP-24	10.9343	105.525	58.2295	-3.28406	0.357248	-9.19264	3.83303e-20	9.1579e-18
BnaA10G0171200ZS	DAP-147	DAP-24	107.61	9.51131	58.5607	3.52483	0.383719	9.18596	4.07886e-20	9.68618e-18
BnaA07G0038800ZS	DAP-147	DAP-24	213.52	34.1547	123.837	2.64516	0.288013	9.18416	4.14764e-20	9.79019e-18
BnaA02G0077800ZS	DAP-147	DAP-24	4.53973	120.696	62.6179	-4.75646	0.518434	-9.17467	4.52963e-20	1.06278e-17
BnaA01G0180200ZS	DAP-147	DAP-24	77.558	4.81383	41.1859	4.05937	0.442694	9.16969	4.7437e-20	1.10638e-17
BnaC05G0273200ZS	DAP-147	DAP-24	1607.75	3702.09	2654.92	-1.20312	0.131598	-9.14241	6.10785e-20	1.41612e-17
BnaC03G0550500ZS	DAP-147	DAP-24	3.60669	67.7084	35.6575	-4.23817	0.464498	-9.1242	7.22678e-20	1.66569e-17
BnaC08G0344200ZS	DAP-147	DAP-24	1.38029	87.9929	44.6866	-6.10909	0.672415	-9.0853	1.03417e-19	2.35624e-17
BnaC03G0780700ZS	DAP-147	DAP-24	34.588	127.235	80.9113	-1.87844	0.206769	-9.08476	1.03932e-19	2.35624e-17
BnaA09G0160400ZS	DAP-147	DAP-24	1096.47	4142.51	2619.49	-1.91776	0.211099	-9.08465	1.04032e-19	2.35624e-17
BnaC09G0080900ZS	DAP-147	DAP-24	47.9497	221.036	134.493	-2.20826	0.243273	-9.0773	1.11306e-19	2.5065e-17
BnaC05G0023600ZS	DAP-147	DAP-24	8.46879	122.481	65.475	-3.8773	0.427443	-9.07091	1.18026e-19	2.64263e-17
BnaC03G0535400ZS	DAP-147	DAP-24	429.814	1330.23	880.024	-1.62973	0.179707	-9.06884	1.2029e-19	2.67802e-17
BnaC08G0516800ZS	DAP-147	DAP-24	111.09	23.8374	67.4635	2.20655	0.243657	9.05597	1.35361e-19	2.99653e-17
BnaC01G0423400ZS	DAP-147	DAP-24	0.853555	200.478	100.666	-7.89576	0.874268	-9.03128	1.69679e-19	3.73514e-17
BnaA01G0048600ZS	DAP-147	DAP-24	998.998	355.368	677.183	1.4907	0.165279	9.01928	1.89324e-19	4.1443e-17
BnaC04G0070500ZS	DAP-147	DAP-24	12.6062	103.512	58.0591	-3.03577	0.337385	-8.99794	2.29995e-19	5.0066e-17
BnaA09G0588400ZS	DAP-147	DAP-24	1.46384	70.7949	36.1294	-5.58774	0.623223	-8.96587	3.07854e-19	6.66444e-17
BnaA09G0662300ZS	DAP-147	DAP-24	181.132	1.71692	91.4244	6.71221	0.749681	8.95342	3.4465e-19	7.42001e-17
BnaA07G0105100ZS	DAP-147	DAP-24	142.416	0	71.2079	9.38251	1.04901	8.94412	3.74933e-19	8.02787e-17
BnaC03G0528500ZS	DAP-147	DAP-24	16.0435	275.574	145.809	-4.103	0.458804	-8.94282	3.79358e-19	8.07847e-17
BnaC09G0246000ZS	DAP-147	DAP-24	149.609	23.0799	86.3442	2.71266	0.30377	8.92997	4.26108e-19	9.02496e-17
BnaC09G0222000ZS	DAP-147	DAP-24	0	99.2184	49.6092	-9.325	1.04447	-8.92793	4.34054e-19	9.14383e-17
BnaA06G0437200ZS	DAP-147	DAP-24	7.32092	89.9547	48.6378	-3.61571	0.406374	-8.89748	5.7129e-19	1.19705e-16
BnaC06G0323800ZS	DAP-147	DAP-24	132.187	0	66.0934	9.2749	1.04431	8.88139	6.60287e-19	1.37617e-16
BnaA05G0393600ZS	DAP-147	DAP-24	899.114	2570.73	1734.92	-1.51569	0.170694	-8.87958	6.71104e-19	1.39132e-16
BnaC04G0214400ZS	DAP-147	DAP-24	81.4132	9.31422	45.3637	3.10757	0.350728	8.86034	7.97738e-19	1.64515e-16
BnaA02G0061000ZS	DAP-147	DAP-24	5.10603	65.0844	35.0952	-3.68457	0.416091	-8.85519	8.35379e-19	1.71375e-16
BnaA06G0004900ZS	DAP-147	DAP-24	1.0836	75.873	38.4783	-6.17121	0.698144	-8.83945	9.61947e-19	1.96312e-16
BnaA01G0015600ZS	DAP-147	DAP-24	81.1123	218.923	150.018	-1.42888	0.162024	-8.81898	1.15505e-18	2.34498e-16
BnaA09G0620900ZS	DAP-147	DAP-24	162.794	0.873841	81.8337	7.55428	0.857567	8.80896	1.26314e-18	2.55123e-16
BnaC03G0417000ZS	DAP-147	DAP-24	0	126.8	63.3998	-9.67973	1.09901	-8.80768	1.27763e-18	2.56725e-16
BnaC02G0216000ZS	DAP-147	DAP-24	311.008	920.981	615.994	-1.5669	0.177988	-8.80339	1.32749e-18	2.65383e-16
BnaA10G0205300ZS	DAP-147	DAP-24	1733.18	26.1405	879.661	6.05898	0.689477	8.78779	1.52531e-18	3.03382e-16
BnaA02G0028400ZS	DAP-147	DAP-24	4.95584	63.5746	34.2652	-3.71125	0.423739	-8.75833	1.98157e-18	3.9214e-16
BnaA06G0143800ZS	DAP-147	DAP-24	215.446	64.5118	139.979	1.74334	0.199157	8.75361	2.06634e-18	4.06862e-16
BnaA05G0392800ZS	DAP-147	DAP-24	0.460095	257.218	128.839	-9.2568	1.05991	-8.73356	2.46789e-18	4.83496e-16
BnaC05G0288500ZS	DAP-147	DAP-24	78.4036	457.485	267.945	-2.54861	0.291972	-8.72897	2.57008e-18	5.01013e-16
BnaC05G0394400ZS	DAP-147	DAP-24	4.7356	65.521	35.1283	-3.81789	0.437523	-8.72615	2.63497e-18	5.11119e-16
BnaA09G0476900ZS	DAP-147	DAP-24	67.151	3.76418	35.4576	4.15965	0.476765	8.72474	2.66801e-18	5.14979e-16
BnaA01G0114800ZS	DAP-147	DAP-24	57.2331	594.196	325.715	-3.37807	0.387244	-8.72338	2.70012e-18	5.18622e-16
BnaC03G0308200ZS	DAP-147	DAP-24	33.2784	125.463	79.3709	-1.91015	0.219201	-8.71413	2.92989e-18	5.6001e-16
BnaA07G0295100ZS	DAP-147	DAP-24	607.658	214.437	411.047	1.50337	0.172562	8.71207	2.98374e-18	5.65112e-16
BnaC02G0092500ZS	DAP-147	DAP-24	4.49575	77.7701	41.1329	-4.13195	0.474282	-8.71201	2.98543e-18	5.65112e-16
BnaC07G0148100ZS	DAP-147	DAP-24	40.8235	179.725	110.274	-2.13721	0.245641	-8.70051	3.30388e-18	6.22384e-16
BnaC02G0540200ZS	DAP-147	DAP-24	420.18	1371.78	895.978	-1.70726	0.196311	-8.69672	3.41601e-18	6.40429e-16
BnaC09G0565100ZS	DAP-147	DAP-24	74.6063	4.00893	39.3076	4.20901	0.4851	8.67659	4.07798e-18	7.60893e-16
BnaA06G0444700ZS	DAP-147	DAP-24	67.5006	5.39088	36.4458	3.62911	0.418718	8.66719	4.42923e-18	8.22515e-16
BnaA07G0347400ZS	DAP-147	DAP-24	127.678	35.212	81.4451	1.86401	0.215925	8.63265	5.99461e-18	1.10796e-15
BnaA03G0428100ZS	DAP-147	DAP-24	28.1697	143.911	86.0401	-2.35642	0.273078	-8.62914	6.18168e-18	1.13717e-15
BnaC04G0121700ZS	DAP-147	DAP-24	19.0473	101.495	60.271	-2.41732	0.280171	-8.62803	6.24196e-18	1.14289e-15
BnaA02G0266400ZS	DAP-147	DAP-24	267.82	81.1225	174.471	1.73147	0.200798	8.62295	6.52529e-18	1.18921e-15
BnaC01G0186100ZS	DAP-147	DAP-24	443.551	1154.62	799.087	-1.37949	0.160242	-8.60878	7.38435e-18	1.33954e-15
BnaC09G0271100ZS	DAP-147	DAP-24	1377.09	4058.25	2717.67	-1.55931	0.181195	-8.60569	7.5859e-18	1.36976e-15
BnaC01G0063000ZS	DAP-147	DAP-24	6.32291	138.55	72.4365	-4.47715	0.52068	-8.59866	8.06522e-18	1.44963e-15
BnaA10G0276200ZS	DAP-147	DAP-24	87.1114	1.96167	44.5365	5.43568	0.632622	8.5923	8.52432e-18	1.52515e-15
BnaC02G0345000ZS	DAP-147	DAP-24	184.304	6.94031	95.6224	4.73254	0.551111	8.58728	8.90528e-18	1.58607e-15
BnaA06G0267300ZS	DAP-147	DAP-24	1.32346	69.6126	35.4681	-5.7786	0.673041	-8.58581	9.01998e-18	1.59923e-15
BnaA05G0455600ZS	DAP-147	DAP-24	67.3019	4.77659	36.0392	3.85629	0.449226	8.5843	9.13912e-18	1.61305e-15
BnaA09G0247900ZS	DAP-147	DAP-24	112.282	20.5526	66.4172	2.46416	0.287107	8.58272	9.26545e-18	1.62802e-15
BnaA08G0011700ZS	DAP-147	DAP-24	82.8654	7.83163	45.3485	3.44346	0.401297	8.58084	9.41794e-18	1.64743e-15
BnaC08G0263900ZS	DAP-147	DAP-24	221.559	49.1314	135.345	2.18203	0.254317	8.57997	9.49017e-18	1.65268e-15
BnaA02G0058500ZS	DAP-147	DAP-24	3.77716	160.673	82.2253	-5.44968	0.635277	-8.57844	9.6169e-18	1.66734e-15
BnaA06G0145500ZS	DAP-147	DAP-24	135.983	32.0715	84.0271	2.07349	0.241729	8.57776	9.67357e-18	1.66978e-15
BnaC09G0583100ZS	DAP-147	DAP-24	115.129	3.73908	59.4339	4.94204	0.576195	8.57703	9.73542e-18	1.67308e-15
BnaA02G0182000ZS	DAP-147	DAP-24	23.8306	114.241	69.0358	-2.26913	0.264736	-8.57131	1.02313e-17	1.75063e-15
BnaC06G0163200ZS	DAP-147	DAP-24	1075.36	211.312	643.338	2.34775	0.273927	8.57071	1.02846e-17	1.75209e-15
BnaC03G0658700ZS	DAP-147	DAP-24	12.0582	115.127	63.5924	-3.26368	0.381335	-8.55857	1.14275e-17	1.93836e-15
BnaA08G0003600ZS	DAP-147	DAP-24	782.486	2313.39	1547.94	-1.56373	0.182873	-8.55092	1.22113e-17	2.06239e-15
BnaC03G0669400ZS	DAP-147	DAP-24	85.3004	8.29799	46.7992	3.35485	0.392646	8.54421	1.29415e-17	2.17633e-15
BnaC07G0364800ZS	DAP-147	DAP-24	98.4115	20.441	59.4262	2.25466	0.263933	8.54253	1.31318e-17	2.1989e-15
BnaC08G0024800ZS	DAP-147	DAP-24	757.535	2977.75	1867.64	-1.97496	0.231288	-8.53899	1.35402e-17	2.25765e-15
BnaC05G0377200ZS	DAP-147	DAP-24	266.92	1075.99	671.453	-2.01184	0.235989	-8.52516	1.52592e-17	2.53348e-15
BnaC08G0446900ZS	DAP-147	DAP-24	1.31365	61.2271	31.2704	-5.59493	0.656497	-8.52241	1.56266e-17	2.56481e-15
BnaA02G0320900ZS	DAP-147	DAP-24	23.0897	105.394	64.2418	-2.19916	0.258046	-8.52237	1.56325e-17	2.56481e-15
BnaC07G0522700ZS	DAP-147	DAP-24	64.5447	4.69182	34.6183	3.80048	0.445947	8.52228	1.56443e-17	2.56481e-15
BnaC02G0031100ZS	DAP-147	DAP-24	7.51746	66.7639	37.1407	-3.17521	0.372755	-8.51821	1.62038e-17	2.64548e-15
BnaC05G0447600ZS	DAP-147	DAP-24	5.03637	108.14	56.588	-4.42667	0.520521	-8.5043	1.82692e-17	2.9703e-15
BnaA10G0019900ZS	DAP-147	DAP-24	103.877	490.187	297.032	-2.24079	0.26368	-8.49813	1.92672e-17	3.11962e-15
BnaA05G0054300ZS	DAP-147	DAP-24	100.297	0	50.1485	8.87657	1.04833	8.46732	2.51111e-17	4.04908e-15
BnaA10G0045600ZS	DAP-147	DAP-24	243.185	48.0863	145.636	2.34945	0.277655	8.46177	2.6336e-17	4.22919e-15
BnaA04G0258100ZS	DAP-147	DAP-24	6.47888	56.8291	31.654	-3.12735	0.369682	-8.45957	2.68357e-17	4.29185e-15
BnaC05G0174300ZS	DAP-147	DAP-24	481.364	103.713	292.538	2.21557	0.261986	8.45682	2.74764e-17	4.37645e-15
BnaA02G0065000ZS	DAP-147	DAP-24	245.743	28.5947	137.169	3.10415	0.367385	8.44933	2.92984e-17	4.64776e-15
BnaA10G0035800ZS	DAP-147	DAP-24	77.8625	3.47005	40.6663	4.49132	0.532052	8.4415	3.13297e-17	4.94996e-15
BnaC03G0614900ZS	DAP-147	DAP-24	364.707	101.75	233.229	1.84415	0.218897	8.42472	3.61615e-17	5.69043e-15
BnaC07G0232700ZS	DAP-147	DAP-24	165.908	51.7944	108.851	1.68039	0.199703	8.41448	3.94644e-17	6.18533e-15
BnaC07G0115400ZS	DAP-147	DAP-24	9.48098	59.9318	34.7064	-2.66294	0.316772	-8.40647	4.22519e-17	6.59584e-15
BnaA06G0442400ZS	DAP-147	DAP-24	79.8261	10.3973	45.1117	2.9679	0.353133	8.40448	4.29759e-17	6.68224e-15
BnaA08G0056800ZS	DAP-147	DAP-24	74.9577	13.1964	44.077	2.52265	0.300269	8.4013	4.41575e-17	6.83883e-15
BnaC04G0477100ZS	DAP-147	DAP-24	146.63	23.7137	85.1721	2.65075	0.316004	8.38835	4.93016e-17	7.60545e-15
BnaC07G0213800ZS	DAP-147	DAP-24	603.353	2877.94	1740.64	-2.25427	0.269414	-8.3673	5.89519e-17	9.05848e-15
BnaA10G0107800ZS	DAP-147	DAP-24	125.753	395.07	260.411	-1.65407	0.197833	-8.36091	6.22387e-17	9.52617e-15
BnaA08G0081400ZS	DAP-147	DAP-24	140.753	2.18686	71.4701	6.08778	0.729884	8.34075	7.38231e-17	1.12553e-14
BnaA01G0053700ZS	DAP-147	DAP-24	1.53218	62.6132	32.0727	-5.40761	0.648569	-8.33775	7.57147e-17	1.1499e-14
BnaA05G0465100ZS	DAP-147	DAP-24	59.8749	6.08591	32.9804	3.30301	0.396322	8.33418	7.8039e-17	1.18062e-14
BnaC07G0103600ZS	DAP-147	DAP-24	76.1112	1.4908	38.801	5.71931	0.686913	8.32612	8.35377e-17	1.25894e-14
BnaC05G0525100ZS	DAP-147	DAP-24	58.5742	4.97947	31.7768	3.57334	0.429619	8.31747	8.98623e-17	1.34907e-14
BnaC05G0367400ZS	DAP-147	DAP-24	85.6436	1.41168	43.5277	5.89435	0.708798	8.31598	9.09991e-17	1.36092e-14
BnaC09G0087900ZS	DAP-147	DAP-24	8.05433	79.9999	44.0271	-3.32462	0.400864	-8.29364	1.09837e-16	1.6364e-14
BnaC07G0157500ZS	DAP-147	DAP-24	100.268	0	50.134	8.87637	1.07216	8.27893	1.24288e-16	1.84106e-14
BnaA09G0140300ZS	DAP-147	DAP-24	90.088	307.153	198.62	-1.77317	0.214184	-8.27871	1.24513e-16	1.84106e-14
BnaC01G0265300ZS	DAP-147	DAP-24	232.474	758.916	495.695	-1.70681	0.206213	-8.27693	1.26387e-16	1.86174e-14
BnaC04G0578400ZS	DAP-147	DAP-24	98.4131	9.37171	53.8924	3.40472	0.411417	8.27559	1.27818e-16	1.87576e-14
BnaA03G0427200ZS	DAP-147	DAP-24	17.5878	139.998	78.7927	-3.00161	0.363211	-8.26409	1.40762e-16	2.05801e-14
BnaA09G0654900ZS	DAP-147	DAP-24	100.707	23.5024	62.1047	2.08407	0.252233	8.26248	1.42672e-16	2.07819e-14
BnaA08G0225200ZS	DAP-147	DAP-24	19.4248	102.02	60.7222	-2.39219	0.290418	-8.23706	1.76496e-16	2.56135e-14
BnaA01G0337200ZS	DAP-147	DAP-24	28.959	369.656	199.308	-3.68031	0.446837	-8.23636	1.77535e-16	2.56693e-14
BnaA09G0459300ZS	DAP-147	DAP-24	4.68689	140.218	72.4525	-4.91153	0.596915	-8.2282	1.90052e-16	2.7378e-14
BnaA04G0264800ZS	DAP-147	DAP-24	6.77049	52.8192	29.7948	-2.97659	0.361795	-8.22727	1.91521e-16	2.74885e-14
BnaC09G0568300ZS	DAP-147	DAP-24	13.4202	80.1231	46.7716	-2.59281	0.315713	-8.21255	2.16536e-16	3.09654e-14
BnaC04G0124900ZS	DAP-147	DAP-24	970.789	3798.37	2384.58	-1.96801	0.239877	-8.20423	2.32076e-16	3.30671e-14
BnaA01G0309400ZS	DAP-147	DAP-24	549.566	2987.3	1768.43	-2.44288	0.298121	-8.19425	2.52161e-16	3.57986e-14
BnaC05G0507600ZS	DAP-147	DAP-24	698.039	2111.19	1404.61	-1.59679	0.194963	-8.19024	2.60698e-16	3.6877e-14
BnaA10G0117800ZS	DAP-147	DAP-24	3.90641	62.4677	33.187	-4.03479	0.492797	-8.18753	2.66644e-16	3.75825e-14
BnaA05G0073800ZS	DAP-147	DAP-24	10.7805	64.9575	37.869	-2.59791	0.317399	-8.18501	2.72283e-16	3.82397e-14
BnaC09G0247200ZS	DAP-147	DAP-24	48.5254	230.466	139.496	-2.25365	0.275537	-8.17913	2.85912e-16	4.00103e-14
BnaA05G0444800ZS	DAP-147	DAP-24	40.102	134.406	87.2541	-1.74652	0.213783	-8.1696	3.09402e-16	4.31434e-14
BnaA07G0355200ZS	DAP-147	DAP-24	0	97.3306	48.6653	-9.29926	1.13843	-8.16848	3.12308e-16	4.33942e-14
BnaA03G0221300ZS	DAP-147	DAP-24	79.9858	0	39.9929	8.54911	1.04755	8.16102	3.32194e-16	4.59942e-14
BnaC05G0081400ZS	DAP-147	DAP-24	56.632	5.46248	31.0472	3.36995	0.413137	8.15699	3.43479e-16	4.73892e-14
BnaC04G0191400ZS	DAP-147	DAP-24	615.888	201.211	408.55	1.61422	0.197909	8.15639	3.45199e-16	4.74593e-14
BnaA08G0079100ZS	DAP-147	DAP-24	41.5708	136.476	89.0234	-1.71665	0.210489	-8.15552	3.47687e-16	4.76344e-14
BnaC08G0161200ZS	DAP-147	DAP-24	5.78504	66.4375	36.1112	-3.53821	0.43478	-8.13792	4.02135e-16	5.49019e-14
BnaC06G0326100ZS	DAP-147	DAP-24	214.615	48.0586	131.337	2.17059	0.267016	8.12906	4.32618e-16	5.8814e-14
BnaC01G0018400ZS	DAP-147	DAP-24	85.3458	431.924	258.635	-2.33951	0.287808	-8.12874	4.33791e-16	5.8814e-14
BnaA09G0503600ZS	DAP-147	DAP-24	4.63072	82.123	43.3769	-4.18907	0.515416	-8.12755	4.38051e-16	5.91867e-14
BnaA02G0180900ZS	DAP-147	DAP-24	103.257	19.4043	61.3304	2.4268	0.298637	8.12626	4.42748e-16	5.96157e-14
BnaA07G0021300ZS	DAP-147	DAP-24	68.9584	8.69899	38.8287	3.02359	0.372294	8.12151	4.60421e-16	6.17832e-14
BnaC02G0362600ZS	DAP-147	DAP-24	246.53	85.0228	165.777	1.54047	0.189697	8.12069	4.63536e-16	6.19889e-14
BnaC08G0111900ZS	DAP-147	DAP-24	51.3218	159.624	105.473	-1.63741	0.201872	-8.1111	5.01654e-16	6.68582e-14
BnaC03G0443800ZS	DAP-147	DAP-24	3.40233	43.5255	23.4639	-3.69063	0.456945	-8.07675	6.65157e-16	8.83487e-14
BnaA09G0400100ZS	DAP-147	DAP-24	1321.54	2765.5	2043.52	-1.06502	0.13205	-8.0653	7.30568e-16	9.67089e-14
BnaC07G0021100ZS	DAP-147	DAP-24	156.091	59.2383	107.664	1.39522	0.173242	8.05361	8.03884e-16	1.06056e-13
BnaA05G0053100ZS	DAP-147	DAP-24	43.6496	499.857	271.753	-3.52268	0.437601	-8.04998	8.28066e-16	1.0888e-13
BnaC05G0033200ZS	DAP-147	DAP-24	36.6863	152.068	94.3773	-2.04794	0.254463	-8.04807	8.41105e-16	1.10224e-13
BnaC08G0526000ZS	DAP-147	DAP-24	125.318	0	62.6588	9.19736	1.14303	8.04645	8.52267e-16	1.11315e-13
BnaC05G0439600ZS	DAP-147	DAP-24	0	68.3567	34.1783	-8.78887	1.09443	-8.03057	9.70226e-16	1.263e-13
BnaC02G0544800ZS	DAP-147	DAP-24	8.87243	121.868	65.3704	-3.79458	0.472543	-8.03013	9.73708e-16	1.26334e-13
BnaA10G0072200ZS	DAP-147	DAP-24	119.869	24.5997	72.2341	2.29432	0.28606	8.02044	1.0537e-15	1.36261e-13
BnaC05G0064600ZS	DAP-147	DAP-24	1.68408	53.5803	27.6322	-4.99017	0.622919	-8.01095	1.13826e-15	1.46711e-13
BnaC04G0611400ZS	DAP-147	DAP-24	106.513	19.0536	62.7834	2.47259	0.308852	8.00576	1.18735e-15	1.52538e-13
BnaC08G0261600ZS	DAP-147	DAP-24	618.972	162.96	390.966	1.92267	0.240241	8.0031	1.21327e-15	1.55358e-13
BnaC05G0530000ZS	DAP-147	DAP-24	5.66594	89.2175	47.4417	-3.97911	0.497679	-7.99534	1.29215e-15	1.6492e-13
BnaA06G0025700ZS	DAP-147	DAP-24	23.2801	93.5979	58.439	-2.0144	0.252058	-7.99179	1.32996e-15	1.6876e-13
BnaC04G0162400ZS	DAP-147	DAP-24	94.221	1.46003	47.8405	6.02619	0.754055	7.9917	1.33085e-15	1.6876e-13
BnaA02G0361600ZS	DAP-147	DAP-24	13.2866	68.3774	40.832	-2.3667	0.296643	-7.97828	1.48392e-15	1.87563e-13
BnaA08G0028100ZS	DAP-147	DAP-24	134.869	24.5334	79.701	2.47293	0.30999	7.97744	1.49399e-15	1.88228e-13
BnaC07G0456300ZS	DAP-147	DAP-24	18.4691	100.814	59.6416	-2.45802	0.308691	-7.96272	1.68294e-15	2.11354e-13
BnaA07G0141000ZS	DAP-147	DAP-24	0	55.9813	27.9907	-8.50279	1.06873	-7.95599	1.77698e-15	2.22314e-13
BnaA03G0365400ZS	DAP-147	DAP-24	820.668	3531.86	2176.26	-2.10573	0.264683	-7.95568	1.78155e-15	2.22314e-13
BnaA02G0062500ZS	DAP-147	DAP-24	5.04551	75.2229	40.1342	-3.93321	0.494919	-7.94717	1.90823e-15	2.37366e-13
BnaA01G0167300ZS	DAP-147	DAP-24	83.5748	488.426	286	-2.55054	0.32098	-7.94611	1.9246e-15	2.38645e-13
BnaA03G0328200ZS	DAP-147	DAP-24	0	60.5158	30.2579	-8.60821	1.08351	-7.94474	1.94601e-15	2.40538e-13
BnaC03G0618700ZS	DAP-147	DAP-24	1595.3	4253	2924.15	-1.41472	0.178191	-7.93935	2.03238e-15	2.50424e-13
BnaC06G0441500ZS	DAP-147	DAP-24	54.048	3.54916	28.7986	3.95926	0.499286	7.92985	2.19412e-15	2.69505e-13
BnaA02G0168400ZS	DAP-147	DAP-24	452.948	1242.1	847.522	-1.45553	0.183565	-7.92924	2.20489e-15	2.69982e-13
BnaA09G0040400ZS	DAP-147	DAP-24	7.11855	115.366	61.2423	-4.03342	0.508915	-7.92552	2.2719e-15	2.77321e-13
BnaC04G0084600ZS	DAP-147	DAP-24	7.19509	54.2653	30.7302	-2.92331	0.368996	-7.92234	2.33082e-15	2.83629e-13
BnaA07G0097000ZS	DAP-147	DAP-24	22.6511	86.3137	54.4824	-1.92666	0.243271	-7.91982	2.37861e-15	2.88549e-13
BnaC04G0518800ZS	DAP-147	DAP-24	95.1046	16.9307	56.0176	2.48433	0.313797	7.917	2.43303e-15	2.9424e-13
BnaA06G0179500ZS	DAP-147	DAP-24	1.11607	59.483	30.2995	-5.81729	0.735487	-7.90944	2.5855e-15	3.11716e-13
BnaC03G0233800ZS	DAP-147	DAP-24	0.230048	105.142	52.686	-8.68678	1.09836	-7.90888	2.59719e-15	3.12164e-13
BnaA09G0036400ZS	DAP-147	DAP-24	235.971	1029.34	632.656	-2.12509	0.268741	-7.90758	2.62441e-15	3.14472e-13
BnaC06G0375100ZS	DAP-147	DAP-24	31.1575	113.017	72.0873	-1.86082	0.235578	-7.89895	2.81271e-15	3.36008e-13
BnaC07G0407100ZS	DAP-147	DAP-24	2.95205	46.8386	24.8953	-3.98754	0.505111	-7.89439	2.9173e-15	3.47443e-13
BnaA05G0359500ZS	DAP-147	DAP-24	2.5701	51.5874	27.0787	-4.35473	0.551775	-7.89221	2.96872e-15	3.52495e-13
BnaC05G0336400ZS	DAP-147	DAP-24	154.956	28.564	91.7601	2.44922	0.310386	7.89088	3.00059e-15	3.55203e-13
BnaA10G0267200ZS	DAP-147	DAP-24	69.2031	2.62697	35.915	4.73364	0.601145	7.87437	3.42452e-15	4.04166e-13
BnaC06G0421000ZS	DAP-147	DAP-24	16.7996	171.958	94.3789	-3.35849	0.427184	-7.86193	3.78256e-15	4.45081e-13
BnaA09G0006300ZS	DAP-147	DAP-24	48.4525	325.816	187.134	-2.74962	0.350677	-7.84089	4.47355e-15	5.24812e-13
BnaC04G0529400ZS	DAP-147	DAP-24	298.838	894.092	596.465	-1.58255	0.201903	-7.83815	4.57235e-15	5.34801e-13
BnaA10G0287900ZS	DAP-147	DAP-24	4.06812	45.2303	24.6492	-3.49534	0.446002	-7.83704	4.6128e-15	5.37927e-13
BnaC05G0521700ZS	DAP-147	DAP-24	3.34991	117.421	60.3856	-5.17503	0.662299	-7.81373	5.55201e-15	6.45533e-13
BnaA04G0173100ZS	DAP-147	DAP-24	17.3449	82.1418	49.7433	-2.25115	0.288475	-7.80363	6.0151e-15	6.97307e-13
BnaC05G0333100ZS	DAP-147	DAP-24	0.655974	76.1938	38.4249	-6.91932	0.88676	-7.80293	6.04873e-15	6.98491e-13
BnaC09G0057300ZS	DAP-147	DAP-24	35.8306	349.408	192.619	-3.28967	0.421608	-7.80267	6.06097e-15	6.98491e-13
BnaA02G0380400ZS	DAP-147	DAP-24	2.4737	83.6161	43.0449	-5.13982	0.65904	-7.79895	6.24259e-15	7.17312e-13
BnaC02G0169300ZS	DAP-147	DAP-24	150.021	673.173	411.597	-2.1667	0.277888	-7.79702	6.33851e-15	7.25332e-13
BnaA03G0219400ZS	DAP-147	DAP-24	4.39324	63.4935	33.9433	-3.85246	0.494108	-7.79681	6.34941e-15	7.25332e-13
BnaA03G0457600ZS	DAP-147	DAP-24	239.502	509.348	374.425	-1.0897	0.139789	-7.79531	6.42528e-15	7.31865e-13
BnaA07G0320200ZS	DAP-147	DAP-24	63.2596	0	31.6298	8.21131	1.05391	7.79131	6.63171e-15	7.53189e-13
BnaA07G0282700ZS	DAP-147	DAP-24	64.4589	0	32.2294	8.23927	1.05756	7.79083	6.65717e-15	7.53895e-13
BnaC03G0481900ZS	DAP-147	DAP-24	1.77507	66.8882	34.3316	-5.29583	0.680254	-7.78507	6.96758e-15	7.86774e-13
BnaC01G0231600ZS	DAP-147	DAP-24	13.4517	282.773	148.112	-4.40729	0.566612	-7.77831	7.35001e-15	8.27573e-13
BnaA06G0084400ZS	DAP-147	DAP-24	0.655974	73.6621	37.1591	-6.86828	0.883115	-7.77734	7.40681e-15	8.31579e-13
BnaA04G0010300ZS	DAP-147	DAP-24	7.14395	60.7109	33.9274	-3.08783	0.397075	-7.77645	7.45898e-15	8.35044e-13
BnaA04G0272400ZS	DAP-147	DAP-24	0.230048	223.38	111.805	-9.77629	1.25782	-7.77242	7.69997e-15	8.59567e-13
BnaC04G0149200ZS	DAP-147	DAP-24	3.68787	55.8225	29.7552	-3.95146	0.509313	-7.7584	8.6008e-15	9.57401e-13
BnaC06G0076100ZS	DAP-147	DAP-24	97.4403	29.314	63.3771	1.73749	0.224365	7.74403	9.63168e-15	1.06912e-12
BnaA03G0497900ZS	DAP-147	DAP-24	66.2204	247.828	157.024	-1.90899	0.246692	-7.73835	1.00716e-14	1.11479e-12
BnaC09G0223200ZS	DAP-147	DAP-24	0.864695	64.3693	32.617	-6.25534	0.808606	-7.73596	1.02627e-14	1.13275e-12
BnaC05G0302000ZS	DAP-147	DAP-24	5.12906	64.4725	34.8008	-3.66859	0.474461	-7.73213	1.05765e-14	1.16409e-12
BnaA01G0210500ZS	DAP-147	DAP-24	303.201	909.31	606.255	-1.5844	0.204937	-7.73114	1.06591e-14	1.1699e-12
BnaC09G0465500ZS	DAP-147	DAP-24	79.3828	16.8908	48.1368	2.25613	0.291857	7.73027	1.07317e-14	1.17459e-12
BnaC06G0063000ZS	DAP-147	DAP-24	0	48.1144	24.0572	-8.28525	1.07312	-7.72072	1.15676e-14	1.26254e-12
BnaC03G0283200ZS	DAP-147	DAP-24	112.14	346.294	229.217	-1.62849	0.211215	-7.71009	1.25732e-14	1.36849e-12
BnaC03G0083900ZS	DAP-147	DAP-24	85.5368	12.9767	49.2568	2.73635	0.355993	7.68653	1.51184e-14	1.64096e-12
BnaA02G0187600ZS	DAP-147	DAP-24	2.51328	42.4784	22.4959	-4.07253	0.530304	-7.67961	1.59571e-14	1.72721e-12
BnaA05G0003400ZS	DAP-147	DAP-24	109.892	259.634	184.763	-1.24408	0.162078	-7.67579	1.64406e-14	1.77463e-12
BnaA03G0082800ZS	DAP-147	DAP-24	4.02281	55.0229	29.5229	-3.78399	0.493532	-7.66717	1.75831e-14	1.89071e-12
BnaC05G0132200ZS	DAP-147	DAP-24	1060.07	4051.69	2555.88	-1.9345	0.252317	-7.66696	1.76125e-14	1.89071e-12
BnaA06G0297700ZS	DAP-147	DAP-24	34.6336	389.21	211.922	-3.48837	0.455613	-7.65645	1.91149e-14	2.04639e-12
BnaC01G0432300ZS	DAP-147	DAP-24	0.208721	76.9842	38.5965	-8.23606	1.07632	-7.65207	1.97771e-14	2.11152e-12
BnaC05G0460800ZS	DAP-147	DAP-24	0	48.4924	24.2462	-8.29154	1.08399	-7.6491	2.02383e-14	2.15488e-12
BnaC02G0002200ZS	DAP-147	DAP-24	111.516	21.2112	66.3635	2.40689	0.314682	7.64863	2.03132e-14	2.157e-12
BnaA01G0367200ZS	DAP-147	DAP-24	144.659	33.9046	89.2819	2.10118	0.274834	7.64527	2.08508e-14	2.2081e-12
BnaC05G0491700ZS	DAP-147	DAP-24	56.9282	5.03996	30.9841	3.52747	0.461644	7.64111	2.15365e-14	2.27457e-12
BnaC01G0009000ZS	DAP-147	DAP-24	58.6041	3.28579	30.945	4.19518	0.549415	7.63572	2.24562e-14	2.36532e-12
BnaC08G0448600ZS	DAP-147	DAP-24	101.066	11.4181	56.2422	3.15646	0.413842	7.62722	2.39868e-14	2.51977e-12
BnaA02G0284700ZS	DAP-147	DAP-24	4.70447	45.0239	24.8642	-3.28248	0.43048	-7.62515	2.43742e-14	2.55362e-12
BnaC04G0199700ZS	DAP-147	DAP-24	64.8965	10.0958	37.4961	2.65881	0.349271	7.61246	2.68933e-14	2.81002e-12
BnaA05G0178600ZS	DAP-147	DAP-24	9.91268	266.288	138.1	-4.76243	0.625872	-7.60927	2.75644e-14	2.87249e-12
BnaC05G0005800ZS	DAP-147	DAP-24	7.76447	92.5977	50.1811	-3.59096	0.472404	-7.60145	2.92834e-14	3.04354e-12
BnaC05G0455400ZS	DAP-147	DAP-24	112.472	25.989	69.2307	2.12276	0.279376	7.59821	3.00248e-14	3.11234e-12
BnaA03G0523400ZS	DAP-147	DAP-24	59.1537	8.25981	33.7067	2.86353	0.377388	7.58778	3.25442e-14	3.36459e-12
BnaC05G0440400ZS	DAP-147	DAP-24	971.048	2501.93	1736.49	-1.36539	0.180098	-7.58136	3.41942e-14	3.52587e-12
BnaC02G0386100ZS	DAP-147	DAP-24	4.943	53.667	29.305	-3.46758	0.457419	-7.58076	3.43544e-14	3.53309e-12
BnaA05G0100800ZS	DAP-147	DAP-24	957.393	3733.45	2345.42	-1.96325	0.259325	-7.57063	3.71433e-14	3.80991e-12
BnaC05G0035400ZS	DAP-147	DAP-24	160.167	522.346	341.257	-1.70711	0.225584	-7.56753	3.80385e-14	3.89155e-12
BnaA02G0036100ZS	DAP-147	DAP-24	0.646162	84.3891	42.5176	-7.06116	0.933401	-7.56497	3.87951e-14	3.95862e-12
BnaA02G0302700ZS	DAP-147	DAP-24	58.9412	7.99079	33.466	2.90597	0.384575	7.55632	4.14647e-14	4.22003e-12
BnaC09G0108500ZS	DAP-147	DAP-24	24.9801	100.555	62.7673	-2.01049	0.266246	-7.55123	4.31182e-14	4.37695e-12
BnaA03G0144200ZS	DAP-147	DAP-24	49.5547	2.27338	25.9141	4.42808	0.586699	7.54745	4.43866e-14	4.49406e-12
BnaC03G0780800ZS	DAP-147	DAP-24	123.072	31.5053	77.2886	1.97932	0.26227	7.54686	4.45868e-14	4.50269e-12
BnaA09G0242400ZS	DAP-147	DAP-24	59.1231	0	29.5616	8.11348	1.07685	7.53448	4.90279e-14	4.93441e-12
BnaC08G0133500ZS	DAP-147	DAP-24	17.5536	77.354	47.4538	-2.14052	0.284105	-7.53425	4.91136e-14	4.93441e-12
BnaC03G0239400ZS	DAP-147	DAP-24	37.2777	136.572	86.9246	-1.87114	0.248625	-7.52597	5.23291e-14	5.24402e-12
BnaC03G0360300ZS	DAP-147	DAP-24	68.6996	5.03996	36.8698	3.79396	0.50444	7.52114	5.43026e-14	5.42791e-12
BnaC02G0158700ZS	DAP-147	DAP-24	4.35366	60.8981	32.6259	-3.83749	0.510698	-7.51421	5.72571e-14	5.70866e-12
BnaA07G0072100ZS	DAP-147	DAP-24	154.136	14.8442	84.4901	3.38909	0.45135	7.50878	5.96788e-14	5.93501e-12
BnaC03G0127800ZS	DAP-147	DAP-24	50.1843	3.69721	26.9408	3.74745	0.499612	7.50073	6.34637e-14	6.29544e-12
BnaA06G0023300ZS	DAP-147	DAP-24	67.5339	14.866	41.1999	2.19373	0.292488	7.50026	6.36932e-14	6.30224e-12
BnaC05G0455300ZS	DAP-147	DAP-24	57.2307	4.54029	30.8855	3.64044	0.4854	7.49987	6.38808e-14	6.30489e-12
BnaC05G0459400ZS	DAP-147	DAP-24	11.6607	101.478	56.5693	-3.13638	0.418237	-7.49904	6.4286e-14	6.32894e-12
BnaA01G0378900ZS	DAP-147	DAP-24	16.4473	80.1328	48.29	-2.28357	0.305219	-7.48175	7.33368e-14	7.20189e-12
BnaA01G0002500ZS	DAP-147	DAP-24	10.568	69.551	40.0595	-2.71972	0.363753	-7.47682	7.61401e-14	7.4585e-12
BnaA06G0032700ZS	DAP-147	DAP-24	10.6705	157.11	83.8901	-3.8861	0.520124	-7.47149	7.92903e-14	7.74771e-12
BnaA10G0230300ZS	DAP-147	DAP-24	345.588	114.857	230.222	1.59269	0.21361	7.45608	8.91365e-14	8.68815e-12
BnaA05G0118600ZS	DAP-147	DAP-24	6.58442	56.7454	31.6649	-3.11474	0.418323	-7.44578	9.63725e-14	9.37014e-12
BnaC02G0255000ZS	DAP-147	DAP-24	20.6258	82.3579	51.4918	-1.99935	0.268564	-7.4446	9.72393e-14	9.43101e-12
BnaC03G0665500ZS	DAP-147	DAP-24	81.6069	331.506	206.557	-2.02356	0.271916	-7.44185	9.92876e-14	9.60589e-12
BnaC03G0466600ZS	DAP-147	DAP-24	20.2062	103.61	61.9083	-2.36649	0.318025	-7.4412	9.97742e-14	9.6292e-12
BnaC06G0141300ZS	DAP-147	DAP-24	1158.08	3139.93	2149	-1.43904	0.1935	-7.43687	1.03099e-13	9.92563e-12
BnaC06G0382700ZS	DAP-147	DAP-24	10.4614	65.5207	37.991	-2.6645	0.358508	-7.43218	1.06822e-13	1.02589e-11
BnaA08G0303900ZS	DAP-147	DAP-24	49.7684	6.26738	28.0179	3.02552	0.40713	7.43132	1.0752e-13	1.03006e-11
BnaC09G0521200ZS	DAP-147	DAP-24	66.5336	14.8975	40.7155	2.15201	0.289801	7.42583	1.12071e-13	1.07104e-11
BnaA10G0104500ZS	DAP-147	DAP-24	57.2629	0	28.6314	8.06491	1.08626	7.42445	1.13249e-13	1.07967e-11
BnaA02G0126200ZS	DAP-147	DAP-24	120.126	35.7248	77.9256	1.75252	0.236274	7.41733	1.19501e-13	1.1365e-11
BnaC05G0408500ZS	DAP-147	DAP-24	21.5679	83.4082	52.4881	-1.95579	0.263741	-7.41558	1.21092e-13	1.14885e-11
BnaA03G0346800ZS	DAP-147	DAP-24	46.5152	131.534	89.0243	-1.50216	0.202997	-7.39992	1.3627e-13	1.28972e-11
BnaA09G0073000ZS	DAP-147	DAP-24	4.24437	39.3549	21.7996	-3.22712	0.436873	-7.38685	1.50345e-13	1.41951e-11
BnaC04G0502100ZS	DAP-147	DAP-24	486.962	1449.18	968.071	-1.57339	0.21317	-7.38094	1.57181e-13	1.48049e-11
BnaC01G0001900ZS	DAP-147	DAP-24	28.6389	129.577	79.1079	-2.18138	0.295562	-7.38047	1.57734e-13	1.48213e-11
BnaA06G0301600ZS	DAP-147	DAP-24	173.063	626.782	399.923	-1.85812	0.252592	-7.35621	1.89207e-13	1.77361e-11
BnaA04G0285800ZS	DAP-147	DAP-24	2.52612	44.728	23.627	-4.1435	0.563334	-7.35532	1.9047e-13	1.78119e-11
BnaA08G0244700ZS	DAP-147	DAP-24	169.689	49.4675	109.578	1.78577	0.242951	7.35032	1.9773e-13	1.84468e-11
BnaC05G0425500ZS	DAP-147	DAP-24	23.5416	83.065	53.3033	-1.82465	0.248441	-7.34439	2.06696e-13	1.92374e-11
BnaA03G0258900ZS	DAP-147	DAP-24	28.7312	102.604	65.6678	-1.83155	0.249512	-7.34054	2.12733e-13	1.97524e-11
BnaA08G0280400ZS	DAP-147	DAP-24	676.201	2501.58	1588.89	-1.88732	0.257126	-7.34005	2.13516e-13	1.97782e-11
BnaA10G0050000ZS	DAP-147	DAP-24	44.7191	4.09915	24.4091	3.46555	0.472681	7.3317	2.27247e-13	2.10005e-11
BnaC09G0149900ZS	DAP-147	DAP-24	69.6473	251.203	160.425	-1.85532	0.253076	-7.3311	2.28273e-13	2.10457e-11
BnaC09G0186400ZS	DAP-147	DAP-24	3.21626	37.9172	20.5667	-3.58251	0.488782	-7.32947	2.31061e-13	2.12527e-11
BnaC08G0024900ZS	DAP-147	DAP-24	106.135	29.6842	67.9096	1.8515	0.25313	7.31443	2.5848e-13	2.37191e-11
BnaA05G0154500ZS	DAP-147	DAP-24	1.31498	41.5437	21.4293	-5.03176	0.68816	-7.3119	2.63384e-13	2.41126e-11
BnaC06G0341000ZS	DAP-147	DAP-24	370.257	138.906	254.581	1.41642	0.193746	7.31073	2.65698e-13	2.42677e-11
BnaC09G0023600ZS	DAP-147	DAP-24	68.6924	205.261	136.977	-1.57958	0.216256	-7.30423	2.78852e-13	2.54099e-11
BnaA10G0027500ZS	DAP-147	DAP-24	47.5751	0	23.7875	7.80011	1.06816	7.30241	2.8266e-13	2.56971e-11
BnaC05G0514200ZS	DAP-147	DAP-24	51.4439	5.02134	28.2326	3.38287	0.463815	7.29357	3.01837e-13	2.73771e-11
BnaC03G0161400ZS	DAP-147	DAP-24	80.7415	19.0497	49.8956	2.09715	0.287556	7.293	3.03127e-13	2.74306e-11
BnaC09G0281400ZS	DAP-147	DAP-24	216.864	29.8695	123.367	2.87427	0.394238	7.29071	3.08326e-13	2.78367e-11
BnaC02G0157200ZS	DAP-147	DAP-24	136.511	49.3194	92.9151	1.47082	0.20197	7.28239	3.27967e-13	2.95419e-11
BnaA09G0212500ZS	DAP-147	DAP-24	34.3369	171.138	102.737	-2.32515	0.319303	-7.28195	3.29017e-13	2.95686e-11
BnaA05G0081400ZS	DAP-147	DAP-24	8.38078	71.7442	40.0625	-3.0922	0.425069	-7.27459	3.47479e-13	3.11563e-11
BnaC09G0322300ZS	DAP-147	DAP-24	201.357	51.6437	126.5	1.96729	0.2705	7.27277	3.52183e-13	3.15059e-11
BnaC03G0182700ZS	DAP-147	DAP-24	0	35.1263	17.5632	-7.82842	1.07845	-7.25897	3.90043e-13	3.48133e-11
BnaA01G0162400ZS	DAP-147	DAP-24	231.361	39.7267	135.544	2.55244	0.351754	7.25632	3.97775e-13	3.54228e-11
BnaA02G0410000ZS	DAP-147	DAP-24	10.2331	140.668	75.4505	-3.79434	0.52358	-7.24692	4.26363e-13	3.78825e-11
BnaC03G0250800ZS	DAP-147	DAP-24	101.143	1.94953	51.5462	5.6639	0.78244	7.23876	4.52807e-13	4.0141e-11
BnaC05G0477700ZS	DAP-147	DAP-24	128.351	29.0156	78.6834	2.13865	0.295466	7.23823	4.54568e-13	4.02062e-11
BnaA09G0534000ZS	DAP-147	DAP-24	0.230048	52.3177	26.2739	-7.6806	1.06202	-7.23205	4.75751e-13	4.1985e-11
BnaC05G0537900ZS	DAP-147	DAP-24	0	38.2602	19.1301	-7.94655	1.09947	-7.22761	4.91566e-13	4.32832e-11
BnaC06G0188500ZS	DAP-147	DAP-24	100.201	257.539	178.87	-1.36569	0.189329	-7.21332	5.46027e-13	4.79708e-11
BnaA05G0139000ZS	DAP-147	DAP-24	518.183	195.574	356.878	1.40877	0.195332	7.21217	5.50664e-13	4.827e-11
BnaC05G0199000ZS	DAP-147	DAP-24	69.7241	16.3612	43.0426	2.10099	0.29163	7.20429	5.83476e-13	5.1032e-11
BnaC01G0281200ZS	DAP-147	DAP-24	3.04171	38.4568	20.7493	-3.69991	0.514399	-7.19268	6.35333e-13	5.54438e-11
BnaA03G0546200ZS	DAP-147	DAP-24	44.7264	5.22421	24.9753	3.10411	0.43172	7.1901	6.47449e-13	5.63756e-11
BnaC02G0093200ZS	DAP-147	DAP-24	2.99773	37.2296	20.1137	-3.65944	0.509145	-7.18743	6.60207e-13	5.7359e-11
BnaA05G0098800ZS	DAP-147	DAP-24	23.4607	95.5214	59.491	-2.02623	0.281926	-7.1871	6.61804e-13	5.73705e-11
BnaC04G0575400ZS	DAP-147	DAP-24	9.05202	49.3324	29.1922	-2.44704	0.340691	-7.18258	6.841e-13	5.91724e-11
BnaC02G0261100ZS	DAP-147	DAP-24	111.847	30.856	71.3517	1.86516	0.259984	7.17411	7.2778e-13	6.28119e-11
BnaA08G0085100ZS	DAP-147	DAP-24	238.742	572.347	405.545	-1.26139	0.175913	-7.17056	7.46942e-13	6.4324e-11
BnaC01G0497500ZS	DAP-147	DAP-24	117.132	21.7288	69.4302	2.43981	0.340781	7.15947	8.09913e-13	6.95939e-11
BnaC05G0021000ZS	DAP-147	DAP-24	36.4405	115.294	75.8673	-1.67004	0.233417	-7.15474	8.383e-13	7.18756e-11
BnaA08G0309500ZS	DAP-147	DAP-24	36.4994	115.435	75.9674	-1.66551	0.232812	-7.15388	8.43563e-13	7.21688e-11
BnaA07G0315300ZS	DAP-147	DAP-24	3.98015	37.2972	20.6387	-3.22274	0.450619	-7.1518	8.56449e-13	7.31116e-11
BnaC05G0053000ZS	DAP-147	DAP-24	98.587	338.944	218.765	-1.784	0.249505	-7.15015	8.66812e-13	7.38354e-11
BnaA07G0095500ZS	DAP-147	DAP-24	1.07209	38.8829	19.9775	-5.21396	0.729764	-7.14472	9.01781e-13	7.66474e-11
BnaC01G0383500ZS	DAP-147	DAP-24	199.56	1037.4	618.481	-2.3787	0.333086	-7.14139	9.23912e-13	7.83585e-11
BnaC07G0083900ZS	DAP-147	DAP-24	146.234	0.940812	73.5875	7.37195	1.0339	7.13024	1.00194e-12	8.47929e-11
BnaC03G0347700ZS	DAP-147	DAP-24	2.11171	35.6029	18.8573	-4.08449	0.573286	-7.12469	1.04316e-12	8.80906e-11
BnaC01G0280700ZS	DAP-147	DAP-24	3.04171	37.8882	20.4649	-3.67813	0.517238	-7.1111	1.15122e-12	9.70071e-11
BnaA02G0272000ZS	DAP-147	DAP-24	92.1313	25.2229	58.6771	1.88111	0.264936	7.10025	1.2453e-12	1.0471e-10
BnaA03G0073600ZS	DAP-147	DAP-24	68.6976	12.1448	40.4212	2.52021	0.355468	7.08984	1.34266e-12	1.12654e-10
Bnascaffold0027G0039200ZS	DAP-147	DAP-24	4.62196	46.2135	25.4177	-3.32295	0.469351	-7.07989	1.44268e-12	1.20787e-10
BnaC08G0476800ZS	DAP-147	DAP-24	87.7524	0.568604	44.1605	7.24719	1.02383	7.07851	1.45715e-12	1.21738e-10
BnaC04G0020700ZS	DAP-147	DAP-24	10.593	240.343	125.468	-4.51758	0.63843	-7.07608	1.4829e-12	1.23627e-10
BnaA04G0287900ZS	DAP-147	DAP-24	51.8	1.21529	26.5076	5.4834	0.775179	7.07372	1.50835e-12	1.25482e-10
BnaA08G0017700ZS	DAP-147	DAP-24	131.018	28.9677	79.9931	2.19513	0.31055	7.06852	1.56592e-12	1.29994e-10
BnaA03G0324500ZS	DAP-147	DAP-24	176.976	603.953	390.465	-1.77247	0.250975	-7.06236	1.637e-12	1.35608e-10
BnaC06G0252600ZS	DAP-147	DAP-24	1097.36	2858.58	1977.97	-1.38097	0.19559	-7.06056	1.65836e-12	1.37088e-10
BnaA09G0649200ZS	DAP-147	DAP-24	54.1545	4.85201	29.5033	3.47142	0.491688	7.0602	1.6626e-12	1.37148e-10
BnaA02G0246100ZS	DAP-147	DAP-24	66.195	0.84308	33.519	6.25977	0.886825	7.05864	1.68144e-12	1.38411e-10
BnaC03G0480300ZS	DAP-147	DAP-24	345.04	1985.37	1165.2	-2.5242	0.357639	-7.05795	1.68972e-12	1.38801e-10
BnaA03G0352400ZS	DAP-147	DAP-24	0	33.4468	16.7234	-7.75944	1.10051	-7.05074	1.77969e-12	1.45886e-10
BnaA05G0178700ZS	DAP-147	DAP-24	17.3601	442.306	229.833	-4.67876	0.663633	-7.05023	1.78625e-12	1.46118e-10
BnaC06G0283000ZS	DAP-147	DAP-24	0	41.3252	20.6626	-8.0581	1.14352	-7.04678	1.8311e-12	1.49475e-10
BnaA03G0139800ZS	DAP-147	DAP-24	93.7163	0	46.8582	8.7781	1.2464	7.04276	1.88471e-12	1.53532e-10
BnaC07G0454300ZS	DAP-147	DAP-24	3.54579	63.2864	33.4161	-4.20099	0.597247	-7.03391	2.00818e-12	1.6325e-10
BnaA01G0007900ZS	DAP-147	DAP-24	40.3815	2.39437	21.3879	4.12058	0.586422	7.02665	2.11544e-12	1.71613e-10
BnaC09G0535000ZS	DAP-147	DAP-24	13.0894	58.3274	35.7084	-2.16469	0.308272	-7.022	2.18708e-12	1.77059e-10
BnaA06G0326400ZS	DAP-147	DAP-24	53.2243	1.47217	27.3483	5.20316	0.741041	7.02142	2.19627e-12	1.77436e-10
BnaC03G0089900ZS	DAP-147	DAP-24	3.55556	55.0346	29.2951	-3.94439	0.561884	-7.01994	2.21969e-12	1.78959e-10
BnaC04G0001500ZS	DAP-147	DAP-24	79.922	11.889	45.9055	2.75316	0.392244	7.01901	2.23453e-12	1.79786e-10
BnaC03G0147500ZS	DAP-147	DAP-24	100.764	26.6421	63.7028	1.92857	0.275083	7.01086	2.36863e-12	1.90185e-10
BnaC02G0399700ZS	DAP-147	DAP-24	1.26797	34.3007	17.7844	-4.7643	0.679701	-7.00941	2.39322e-12	1.91766e-10
BnaA03G0032200ZS	DAP-147	DAP-24	11.0362	62.9667	37.0014	-2.52053	0.359798	-7.00541	2.46262e-12	1.96925e-10
BnaA05G0481400ZS	DAP-147	DAP-24	5.06205	43.2662	24.1641	-3.09879	0.442969	-6.9955	2.64314e-12	2.10929e-10
BnaA01G0306300ZS	DAP-147	DAP-24	54.7294	1.10645	27.9179	5.5735	0.796775	6.99508	2.65113e-12	2.11137e-10
BnaA07G0154600ZS	DAP-147	DAP-24	36.9084	203.79	120.349	-2.46989	0.35326	-6.9917	2.71575e-12	2.15844e-10
BnaC07G0401700ZS	DAP-147	DAP-24	65.7567	185.274	125.515	-1.49728	0.214204	-6.98999	2.74896e-12	2.18042e-10
BnaA03G0400400ZS	DAP-147	DAP-24	62.716	0.305237	31.5106	7.47838	1.07014	6.98821	2.78422e-12	2.20093e-10
BnaC03G0533200ZS	DAP-147	DAP-24	18.714	79.8073	49.2606	-2.08932	0.298982	-6.98811	2.78606e-12	2.20093e-10
BnaC09G0058800ZS	DAP-147	DAP-24	735.751	196.292	466.022	1.90852	0.273486	6.97849	2.9837e-12	2.34927e-10
BnaA06G0084300ZS	DAP-147	DAP-24	47.7785	402.395	225.087	-3.07815	0.441097	-6.97839	2.98583e-12	2.34927e-10
BnaC08G0482400ZS	DAP-147	DAP-24	224.299	1357.69	790.995	-2.59828	0.372457	-6.97605	3.03591e-12	2.38389e-10
BnaA08G0007000ZS	DAP-147	DAP-24	1.09341	38.1925	19.643	-5.18431	0.743207	-6.97559	3.04591e-12	2.38696e-10
BnaA07G0337800ZS	DAP-147	DAP-24	2.83432	41.0365	21.9354	-3.89287	0.558142	-6.9747	3.0653e-12	2.39736e-10
BnaA06G0202700ZS	DAP-147	DAP-24	237.162	550.363	393.762	-1.21562	0.174335	-6.9729	3.10468e-12	2.42332e-10
BnaC04G0386000ZS	DAP-147	DAP-24	314.682	32.9873	173.835	3.2616	0.467781	6.97249	3.1138e-12	2.42561e-10
BnaC03G0011500ZS	DAP-147	DAP-24	0	31.712	15.856	-7.67556	1.10143	-6.96871	3.19855e-12	2.48668e-10
BnaA07G0366400ZS	DAP-147	DAP-24	6.00831	49.8938	27.9511	-3.0768	0.442112	-6.95932	3.41907e-12	2.65286e-10
BnaC08G0284400ZS	DAP-147	DAP-24	131.085	53.4389	92.2619	1.29608	0.186269	6.95811	3.44878e-12	2.67063e-10
BnaA09G0028400ZS	DAP-147	DAP-24	933.124	3423.72	2178.42	-1.87543	0.269543	-6.95781	3.45611e-12	2.67102e-10
BnaC03G0332400ZS	DAP-147	DAP-24	90.7025	20.1693	55.4359	2.15697	0.310058	6.95664	3.48476e-12	2.68786e-10
BnaC05G0386700ZS	DAP-147	DAP-24	0	29.4794	14.7397	-7.57443	1.0889	-6.95607	3.49908e-12	2.6936e-10
BnaA03G0193800ZS	DAP-147	DAP-24	477.29	2116.8	1297.04	-2.14878	0.309032	-6.95325	3.56955e-12	2.74247e-10
BnaA09G0188300ZS	DAP-147	DAP-24	48.5854	1.10645	24.8459	5.39904	0.777003	6.94855	3.69063e-12	2.82994e-10
BnaA01G0053800ZS	DAP-147	DAP-24	1.30214	37.6868	19.4945	-4.89854	0.705003	-6.94825	3.69843e-12	2.83038e-10
BnaA01G0286200ZS	DAP-147	DAP-24	0	29.6451	14.8226	-7.58054	1.09178	-6.9433	3.83045e-12	2.9257e-10
BnaC04G0254400ZS	DAP-147	DAP-24	194.28	43.5709	118.925	2.16824	0.312388	6.94084	3.89787e-12	2.9714e-10
BnaC09G0536000ZS	DAP-147	DAP-24	465.262	116.948	291.105	1.99446	0.287428	6.93899	3.94924e-12	3.00472e-10
BnaA01G0093600ZS	DAP-147	DAP-24	52.9809	4.34389	28.6624	3.61345	0.520882	6.93718	4.00001e-12	3.03745e-10
BnaC06G0198500ZS	DAP-147	DAP-24	184.581	25.6313	105.106	2.86279	0.412986	6.93194	4.15113e-12	3.14611e-10
BnaC03G0032700ZS	DAP-147	DAP-24	40.4527	2.04078	21.2468	4.32411	0.62393	6.93044	4.19519e-12	3.17336e-10
BnaA09G0411700ZS	DAP-147	DAP-24	39.2356	0	19.6178	7.52403	1.0869	6.92248	4.43814e-12	3.35066e-10
BnaC06G0204700ZS	DAP-147	DAP-24	8.43192	47.3826	27.9073	-2.48964	0.359826	-6.91901	4.54822e-12	3.42717e-10
BnaC04G0594800ZS	DAP-147	DAP-24	18.1686	66.6423	42.4055	-1.88046	0.271814	-6.9182	4.57414e-12	3.44008e-10
BnaC03G0809300ZS	DAP-147	DAP-24	0	33.5818	16.7909	-7.76893	1.12387	-6.91265	4.75698e-12	3.56191e-10
BnaC04G0387500ZS	DAP-147	DAP-24	97.4517	20.7705	59.1111	2.2484	0.325264	6.91256	4.7598e-12	3.56191e-10
BnaC03G0780600ZS	DAP-147	DAP-24	172.847	73.6627	123.255	1.23403	0.178524	6.91238	4.76592e-12	3.56191e-10
BnaC09G0595300ZS	DAP-147	DAP-24	14.9284	62.5802	38.7543	-2.06784	0.299158	-6.91218	4.77249e-12	3.56191e-10
[truncated: 5,325 more rows]

## Sheet: Table S10
Table S10. Selective sweeps of semi-winter vs spring oilseed rape using XP-CLR
[truncated: 955 more rows]
